# Supplementary material for: Mechanistic insights into the early life stage microbiota of silver pompano (Trachinotus blochii)
Source: Front Microbiol. 2024 Apr 17;15:1356828. doi: 10.3389/fmicb.2024.1356828 (PMC11061439; doi:10.3389/fmicb.2024.1356828)
Supplement: SUPPLEMENTARY FILE 3 — Taxonomic landscape in the microbiota profiles of T. blochii across different studied groups. [file Data_Sheet_3.xlsx]

## Sheet: Genes
function	description	Egg	1dph	3dph	5dph	7dph	10dph	12dph	20dph	25dph	Gut
K00001	E1.1.1.1, adh; alcohol dehydrogenase [EC:1.1.1.1]	147.607	14	23.44	16.4467	27.6633	45	41	88.3333	54.67	96
K00002	AKR1A1, adh; alcohol dehydrogenase (NADP+) [EC:1.1.1.2]	1.77667	0.333333	0.443333	0	1	0.443333	0	0	2.33333	1.27833
K00003	E1.1.1.3; homoserine dehydrogenase [EC:1.1.1.3]	236.523	10.6667	29.3867	23.39	31.11	57	42.8333	157.833	95.7267	151.737
K00004	BDH, butB; (R,R)-butanediol dehydrogenase / meso-butanediol dehydrogenase / diacetyl reductase [EC:1.1.1.4 1.1.1.- 1.1.1.303]	28.4167	1.66667	1.66667	1	1.33333	4.66667	5	12.6667	9.33333	16.2083
K00005	gldA; glycerol dehydrogenase [EC:1.1.1.6]	29.7833	1.19333	1.66667	0.676667	0.2	5.7	8.11667	26.7333	7.15667	12.8617
K00006	GPD1; glycerol-3-phosphate dehydrogenase (NAD+) [EC:1.1.1.8]	1.66667	0	0	0	0	0	0	0	0	0
K00007	dalD; D-arabinitol 4-dehydrogenase [EC:1.1.1.11]	8.33333	0	0	0	0	1.33333	0	0	6.33333	7.33333
K00008	SORD, gutB; L-iditol 2-dehydrogenase [EC:1.1.1.14]	64.8333	2	13.6667	5.66667	13	16.6667	4.66667	28.3333	25	70.9167
K00009	mtlD; mannitol-1-phosphate 5-dehydrogenase [EC:1.1.1.17]	6.45	2.19333	1.66667	4.84333	0.2	13.7	2.78333	4.73333	6.93333	12.6117
K00010	iolG; myo-inositol 2-dehydrogenase / D-chiro-inositol 1-dehydrogenase [EC:1.1.1.18 1.1.1.369]	99.7267	6	21.3333	12	4.53	20.8667	47.2	115.067	61.1567	75.8867
K00011	AKR1B; aldehyde reductase [EC:1.1.1.21]	0	0	0	0	0	0	0	0	2.33333	0
K00012	UGDH, ugd; UDPglucose 6-dehydrogenase [EC:1.1.1.22]	252.723	12.5267	30.3867	24.5667	31.42	76.2	46.95	158.9	115.103	158.282
K00013	hisD; histidinol dehydrogenase [EC:1.1.1.23]	235.89	12.86	27.3867	24.5667	31.6433	66.0333	42.1167	147.233	104.437	150.523
K00014	aroE; shikimate dehydrogenase [EC:1.1.1.25]	305.693	17.1933	33.9433	28.2333	37.9767	85.4767	65.45	187.567	124.217	201.718
K00015	gyaR, GOR1; glyoxylate reductase [EC:1.1.1.26]	67.8033	4.66667	13.4433	9	11	20.5567	7.83333	22	22.9467	47.125
K00016	LDH, ldh; L-lactate dehydrogenase [EC:1.1.1.27]	19.36	2.52667	3.44333	5.34333	3.33333	13.2233	1.91667	29.8333	21.67	35.3783
K00018	hprA; glycerate dehydrogenase [EC:1.1.1.29]	64.5	3.52667	8	4.84333	1.66667	16.3333	19.25	36.6667	27.1667	19.845
K00019	E1.1.1.30, bdh; 3-hydroxybutyrate dehydrogenase [EC:1.1.1.30]	157.637	9.66667	16.5	14.3333	15.11	30.8333	31	55	47.4467	93.7083
K00020	mmsB, HIBADH; 3-hydroxyisobutyrate dehydrogenase [EC:1.1.1.31]	332.163	22.2467	40.7767	28.1967	42.11	89.39	79.25	164.667	115.17	176.593
K00021	HMGCR; hydroxymethylglutaryl-CoA reductase (NADPH) [EC:1.1.1.34]	1.91667	0.193333	0	0.176667	0	0	0.25	0	0	0.378333
K00023	phbB; acetoacetyl-CoA reductase [EC:1.1.1.36]	102.917	7.52667	14.6667	8.84333	9	32	30.4167	67	45.5	61.295
K00024	mdh; malate dehydrogenase [EC:1.1.1.37]	183.447	11.5267	24.72	21.5667	32.31	61.3667	31.45	111.067	83.27	136.148
K00027	ME2, sfcA, maeA; malate dehydrogenase (oxaloacetate-decarboxylating) [EC:1.1.1.38]	99.2833	7.52667	8.33333	13.4	21.7533	50.2	12.45	103.233	34.3233	91.5283
K00028	E1.1.1.39; malate dehydrogenase (decarboxylating) [EC:1.1.1.39]	0	0	0	0	0	0	0	0	0	0
K00029	E1.1.1.40, maeB; malate dehydrogenase (oxaloacetate-decarboxylating)(NADP+) [EC:1.1.1.40]	161.417	13.86	21.9433	14.7333	20.2	48.9767	43.6167	74.4	81.8267	93.2733
K00030	IDH3; isocitrate dehydrogenase (NAD+) [EC:1.1.1.41]	24.4967	0.666667	6.72	1.89	2.33333	11.1133	6.33333	5	10.1133	18.2217
K00031	IDH1, IDH2, icd; isocitrate dehydrogenase [EC:1.1.1.42]	235.697	14.1933	28.0533	24.5667	28.31	61.8667	56.2833	164.733	123.27	160.398
K00032	E1.1.1.43; phosphogluconate 2-dehydrogenase [EC:1.1.1.43]	22.3333	1.33333	6.66667	3.66667	0	6	14.6667	36.6667	15	16.1667
K00033	PGD, gnd, gntZ; 6-phosphogluconate dehydrogenase [EC:1.1.1.44 1.1.1.343]	176.863	9.52667	21.9433	16.1233	26.8633	51.9233	29.45	130.733	82.2167	131.182
K00034	gdh; glucose 1-dehydrogenase [EC:1.1.1.47]	36.22	0.333333	1.66667	2.66667	1.44333	4	8.33333	31.3333	21.78	19.7217
K00035	gal; D-galactose 1-dehydrogenase [EC:1.1.1.48]	4.52667	2	3.66667	1.66667	5.33333	5.33333	1.5	0	0.556667	6.375
K00036	G6PD, zwf; glucose-6-phosphate 1-dehydrogenase [EC:1.1.1.49 1.1.1.363]	277.863	12.1933	29.9433	19.79	34.0867	63.59	51.1167	168.733	89.27	156.32
K00038	E1.1.1.53; 3alpha(or 20beta)-hydroxysteroid dehydrogenase [EC:1.1.1.53]	33.3333	4	2	4	14.11	12.3333	4	18.3333	0.333333	34.8333
K00039	rbtD; ribitol 2-dehydrogenase [EC:1.1.1.56]	5.11	0	1.66667	0	0	0	1	0	0.556667	3.5
K00040	uxuB; fructuronate reductase [EC:1.1.1.57]	24.2267	2.19333	4	3.51	8.2	5.03333	6.61667	13.0667	4.15667	16.945
K00041	uxaB; tagaturonate reductase [EC:1.1.1.58]	16.86	1.66667	1.11	1.33333	4.66667	4.61	1	1.66667	11.0567	15.2867
K00042	garR, glxR; 2-hydroxy-3-oxopropionate reductase [EC:1.1.1.60]	120.2	7.66667	18.3333	13.3333	11.31	32.2	31.5333	88.7333	47.1	77.2333
K00045	E1.1.1.67, mtlK; mannitol 2-dehydrogenase [EC:1.1.1.67]	46.1933	2	8.33333	3.66667	0	6	21	37.6667	18	21.875
K00046	idnO; gluconate 5-dehydrogenase [EC:1.1.1.69]	31.17	3.66667	4.11	3	8.08667	17.2567	7.2	10.7333	20.88	30.1583
K00048	fucO; lactaldehyde reductase [EC:1.1.1.77]	0.666667	0	0	0	0	0.166667	0	0	1.33333	2.33333
K00050	ttuD; hydroxypyruvate reductase [EC:1.1.1.81]	83.4133	5	13.7767	6.22333	9.33333	19.89	25	59	33.9467	60.5133
K00051	E1.1.1.82; malate dehydrogenase (NADP+) [EC:1.1.1.82]	0	0	0	0	0	0	0	0	0	0
K00052	leuB, IMDH; 3-isopropylmalate dehydrogenase [EC:1.1.1.85]	241.14	12.86	27.3867	24.5667	30.9767	64.3667	41.95	152.9	104.77	151.26
K00053	ilvC; ketol-acid reductoisomerase [EC:1.1.1.86]	228.807	12.86	26.72	24.3433	32.6433	65.3667	40.95	152.233	103.77	146.482
K00054	mvaA; hydroxymethylglutaryl-CoA reductase [EC:1.1.1.88]	20.7767	0.333333	1.44333	0.89	1	2.77667	2	23	18	12.7783
K00055	E1.1.1.90; aryl-alcohol dehydrogenase [EC:1.1.1.90]	7.33333	1.33333	0	1.33333	3.44333	4	0.666667	6.33333	0	9.16667
K00057	gpsA; glycerol-3-phosphate dehydrogenase (NAD(P)+) [EC:1.1.1.94]	227.557	12.86	27.72	23.4567	32.31	64.5333	39.95	141.233	96.3267	154.398
K00058	serA, PHGDH; D-3-phosphoglycerate dehydrogenase / 2-oxoglutarate reductase [EC:1.1.1.95 1.1.1.399]	325.05	20.5267	44.6033	33.1233	50.8633	99.7567	49.95	181.567	157.11	254.288
K00059	fabG; 3-oxoacyl-[acyl-carrier protein] reductase [EC:1.1.1.100]	1185.92	67.9667	150.433	134.613	172.433	319.34	217.75	667	485.027	844.242
K00060	tdh; threonine 3-dehydrogenase [EC:1.1.1.103]	34.6167	2.86	0.833333	1.17667	2.64333	17.7	10.45	17.0667	18.9333	16.1117
K00064	E1.1.1.122; D-threo-aldose 1-dehydrogenase [EC:1.1.1.122]	42.3033	2.33333	6.44333	3.33333	5.11	6.44333	8.5	23.3333	6.39	20.1533
K00065	kduD; 2-dehydro-3-deoxy-D-gluconate 5-dehydrogenase [EC:1.1.1.127]	22.75	4.86	5.5	6.51	9	20.1667	4.41667	12.3333	1.66667	29.9067
K00066	algD; GDP-mannose 6-dehydrogenase [EC:1.1.1.132]	23.6667	2	5	2.33333	3.11	4.33333	9.66667	12.6667	8	11.3333
K00067	rfbD, rmlD; dTDP-4-dehydrorhamnose reductase [EC:1.1.1.133]	252.773	10.6667	30.1633	22.5567	27.11	60.11	47	174.5	116.78	141.51
K00068	srlD; sorbitol-6-phosphate 2-dehydrogenase [EC:1.1.1.140]	1.53333	0	0	0	0.2	0.366667	2.53333	4.73333	2.26667	3.9
K00073	allD; ureidoglycolate dehydrogenase (NAD+) [EC:1.1.1.350]	0	0	0	0	0	0.166667	0	0	0	0
K00074	paaH, hbd, fadB, mmgB; 3-hydroxybutyryl-CoA dehydrogenase [EC:1.1.1.157]	217.973	15	30.4433	31.78	41.4167	74.6433	41.7	134.9	87.94	189.928
K00075	murB; UDP-N-acetylmuramate dehydrogenase [EC:1.3.1.98]	236.057	12.86	26.3867	23.5667	31.9767	65.3667	41.6167	150.567	96.2167	154.648
K00076	hdhA; 7-alpha-hydroxysteroid dehydrogenase [EC:1.1.1.159]	10.8867	0.666667	0.333333	0	1	1.83333	5.33333	5.66667	2.78	2.5
K00077	panE, apbA; 2-dehydropantoate 2-reductase [EC:1.1.1.169]	232.843	9.86	19.2767	18.6267	28.9533	49.8433	36.3167	82.8	85.8667	147.623
K00082	ribD2; 5-amino-6-(5-phosphoribosylamino)uracil reductase [EC:1.1.1.193]	13.1667	0	1.66667	1.66667	6.22	1	0	10	0	13.4167
K00086	dhaT; 1,3-propanediol dehydrogenase [EC:1.1.1.202]	0	0	0	0	0	0	0	0	0	0
K00087	ygeS, xdhA; xanthine dehydrogenase molybdenum-binding subunit [EC:1.17.1.4]	6.33333	0	0.666667	0.666667	0	0.166667	0	15.3333	5	3.83333
K00088	IMPDH, guaB; IMP dehydrogenase [EC:1.1.1.205]	267.223	15.5267	31.0533	28.4	42.1967	77.7	44.95	175.567	117.66	197.065
K00090	ghrB; glyoxylate/hydroxypyruvate/2-ketogluconate reductase [EC:1.1.1.79 1.1.1.81 1.1.1.215]	68.2	2	7.16667	3.66667	1.2	9.36667	25.2	46.4	36.2667	34.65
K00091	E1.1.1.219; dihydroflavonol-4-reductase [EC:1.1.1.219]	77.5533	1.33333	4.77667	3.78	2	2.55667	13	63	31.5567	27.8333
K00094	E1.1.1.251, gatD; galactitol-1-phosphate 5-dehydrogenase [EC:1.1.1.251]	0	0	0	0	0	0.333333	0	0	0	0
K00096	araM, egsA; glycerol-1-phosphate dehydrogenase [NAD(P)+] [EC:1.1.1.261]	16.6667	0	1.66667	1.66667	0.11	2	0.666667	10.3333	3.33333	15.7783
K00097	pdxA; 4-hydroxythreonine-4-phosphate dehydrogenase [EC:1.1.1.262]	189.307	11.1933	20.3867	13.7333	23.5333	45.2	41.2833	81.4	80.9367	101.857
K00098	idnD; L-idonate 5-dehydrogenase [EC:1.1.1.264]	15.5267	0	0	0	0.11	2	0	0	6.33333	9.20833
K00099	dxr; 1-deoxy-D-xylulose-5-phosphate reductoisomerase [EC:1.1.1.267]	217.087	11.86	27.2767	23.6767	31.6433	65.9233	39.2833	129.233	91.4367	143.162
K00100	bdhAB; butanol dehydrogenase [EC:1.1.1.-]	81.1233	12.1933	18.9967	17.8433	23.7767	41.33	28.5833	35.3333	46.17	91.43
K00101	lldD; L-lactate dehydrogenase (cytochrome) [EC:1.1.2.3]	94.5867	6.86	10.6667	4.84333	15.5333	18.0333	25.95	42.7333	25.49	49.4583
K00102	LDHD, dld; D-lactate dehydrogenase (cytochrome) [EC:1.1.2.4]	45.6367	6.33333	9	7	8.66667	15.6667	12.6667	25	21.5567	52.4583
K00103	GULO; L-gulonolactone oxidase [EC:1.1.3.8]	14.3333	0	0	2.66667	0	0	0	11.3333	0	6.5
K00104	glcD; glycolate oxidase [EC:1.1.3.15]	200.47	9.33333	25.11	15.5567	32.22	46.0567	35	140.333	70.5033	140.458
K00105	E1.1.3.21; alpha-glycerophosphate oxidase [EC:1.1.3.21]	0	0	0	0	0	0	0	0	0	0
K00107	ALO; D-arabinono-1,4-lactone oxidase [EC:1.1.3.37]	4.66667	0	0	0	0	0	0	0	0	1.66667
K00108	betA, CHDH; choline dehydrogenase [EC:1.1.99.1]	223.28	7.52667	21.8333	10.0667	16.0867	31.5333	61.1167	109.733	81.6033	104.195
K00109	L2HGDH; 2-hydroxyglutarate dehydrogenase [EC:1.1.99.2]	8.16667	0	0	1	1.33333	0.833333	0	11.3333	0	3.75
K00111	glpA, glpD; glycerol-3-phosphate dehydrogenase [EC:1.1.5.3]	267.7	16.86	28.7767	29.4	35.3967	79.9567	56.15	174.967	95.5933	169.817
K00112	glpB; glycerol-3-phosphate dehydrogenase subunit B [EC:1.1.5.3]	5.53333	1.33333	0.666667	1	0.2	11.7	2.53333	12.4	5.43333	4.4
K00113	glpC; glycerol-3-phosphate dehydrogenase subunit C [EC:1.1.5.3]	8.53333	1.33333	0	1.22333	0.2	11.7	2.53333	12.4	5.43333	7.4
K00114	exaA; alcohol dehydrogenase (cytochrome c) [EC:1.1.2.8]	67.4433	2	15.3333	4.33333	5.33333	16.3333	30.3333	49.3333	24.3333	35.8333
K00116	mqo; malate dehydrogenase (quinone) [EC:1.1.5.4]	120.92	5.33333	11.11	10.1667	11.2	19.1433	31.5333	60.4	41.3233	48.595
K00117	gcd; quinoprotein glucose dehydrogenase [EC:1.1.5.2]	93.8867	5.33333	18.22	5.33333	8.86667	21.0333	35.5333	52.7333	35.38	46.8033
K00118	gfo; glucose-fructose oxidoreductase [EC:1.1.99.28]	1.77667	0.333333	1.61	0	2.33333	1.77667	0	0	1.22333	2.08333
K00121	frmA, ADH5, adhC; S-(hydroxymethyl)glutathione dehydrogenase / alcohol dehydrogenase [EC:1.1.1.284 1.1.1.1]	262.14	12.86	21.5	19.0667	25.8633	53.0333	51.7833	143.067	66.1567	124.653
K00122	FDH; formate dehydrogenase [EC:1.17.1.9]	34.6667	0	0	0	3.11	0.5	1	0	2.33333	4.72167
K00123	fdoG, fdhF, fdwA; formate dehydrogenase major subunit [EC:1.17.1.9]	311.127	16.72	34.4433	24.3533	35.71	88.8233	60.4333	162.033	99.0233	163.553
K00124	fdoH, fdsB; formate dehydrogenase iron-sulfur subunit	142.2	8.19333	14.3333	9.84333	14.5333	32.5333	30.7833	66.5667	44.9333	75.9583
K00125	fdhB; formate dehydrogenase (coenzyme F420) beta subunit [EC:1.17.98.3 1.8.98.6]	0	0	0	0	0	0	0	0	0	0.333333
K00126	fdsD; formate dehydrogenase subunit delta [EC:1.17.1.9]	34	0.666667	3.66667	0.666667	1.33333	4.33333	6.66667	12.6667	14	21.6667
K00127	fdoI, fdsG; formate dehydrogenase subunit gamma	118.867	5.52667	11.6667	6.51	9.97667	25.8667	29.1167	48.4	43.6	52.7367
K00128	ALDH; aldehyde dehydrogenase (NAD+) [EC:1.2.1.3]	423.74	34	61.2733	51.67	83.2167	132.333	91.5	228	156.677	346.598
K00129	E1.2.1.5; aldehyde dehydrogenase (NAD(P)+) [EC:1.2.1.5]	0	0	0	0	0	0	0	0	0	0
K00130	betB, gbsA; betaine-aldehyde dehydrogenase [EC:1.2.1.8]	210.81	2.19333	11.3333	5.51	21.0833	26.8667	32.1167	88.7333	42.1567	93.4033
K00131	gapN; glyceraldehyde-3-phosphate dehydrogenase (NADP+) [EC:1.2.1.9]	29.2767	0.333333	4.11	3	2.33333	4.27667	9.33333	25.3333	14.5567	19.8617
K00132	E1.2.1.10; acetaldehyde dehydrogenase (acetylating) [EC:1.2.1.10]	0	0	1.33333	0	0.666667	1.33333	1	0	0	1.83333
K00133	asd; aspartate-semialdehyde dehydrogenase [EC:1.2.1.11]	256.973	15.0533	30.0533	28.0767	32.7533	79.0333	46.5333	169.233	113.993	168.693
K00134	GAPDH, gapA; glyceraldehyde 3-phosphate dehydrogenase [EC:1.2.1.12]	378.553	22.2467	40.6067	36.0867	42.1967	98.0867	69.45	233.733	153.66	210.878
K00135	gabD; succinate-semialdehyde dehydrogenase / glutarate-semialdehyde dehydrogenase [EC:1.2.1.16 1.2.1.79 1.2.1.20]	358.223	20.3867	34.4967	25.41	54.3967	98.1767	67.7333	162.467	91.65	214.28
K00137	prr; aminobutyraldehyde dehydrogenase [EC:1.2.1.19]	35.95	0	4.33333	1.33333	0.2	6.7	14.5333	31.0667	15.2667	16.775
K00138	aldB; aldehyde dehydrogenase [EC:1.2.1.-]	137.253	8.86	11.4433	12.9	10.9767	42.4767	40.95	71.0667	49.8233	72.9317
K00140	mmsA, iolA, ALDH6A1; malonate-semialdehyde dehydrogenase (acetylating) / methylmalonate-semialdehyde dehydrogenase [EC:1.2.1.18 1.2.1.27]	283.393	16.0533	33.1667	21.91	20.6433	64.3667	76.8667	171.4	93.1567	152.198
K00141	xylC; benzaldehyde dehydrogenase (NAD) [EC:1.2.1.28]	14.3333	0	1.66667	2.33333	2.77667	2.33333	4	22	6	11.1667
K00145	argC; N-acetyl-gamma-glutamyl-phosphate reductase [EC:1.2.1.38]	234.307	12.86	28.3867	24.79	31.31	66.0333	45.45	147.567	105.437	151.398
K00146	feaB; phenylacetaldehyde dehydrogenase [EC:1.2.1.39]	60.2	0	4.66667	2.33333	0.2	8.36667	20.2	48.7333	23.6	21.4
K00147	proA; glutamate-5-semialdehyde dehydrogenase [EC:1.2.1.41]	235.973	13.86	25.0533	22.5667	28.9767	64.2	43.95	156.567	87.27	136.232
K00148	fdhA; glutathione-independent formaldehyde dehydrogenase [EC:1.2.1.46]	37.86	1.33333	2	0.666667	0.11	5	10.3333	22.6667	14.3333	15.5417
K00150	gap2; glyceraldehyde-3-phosphate dehydrogenase (NAD(P)) [EC:1.2.1.59]	21.3333	1	0	0	0	1	2.66667	20.6667	3	4.83333
K00151	hpaE, hpcC; 5-carboxymethyl-2-hydroxymuconic-semialdehyde dehydrogenase [EC:1.2.1.60]	24.81	1.33333	1.66667	0.666667	1.53333	4.86667	8.53333	16.4	10.1567	15.9833
K00153	E1.1.1.306; S-(hydroxymethyl)mycothiol dehydrogenase [EC:1.1.1.306]	12.8333	1.33333	1.66667	2.16667	6.22	4.33333	1.66667	12.3333	2.66667	16.75
K00154	E1.2.1.68; coniferyl-aldehyde dehydrogenase [EC:1.2.1.68]	87.8867	5.19333	12.2767	6.51	6.33333	27.61	29.4167	45.6667	25.2233	28.115
K00156	poxB; pyruvate dehydrogenase (quinone) [EC:1.2.5.1]	52.1167	5.33333	4.66667	6.05667	13.31	13.0333	8.53333	24.0667	12.6	44.8583
K00158	E1.2.3.3, poxL; pyruvate oxidase [EC:1.2.3.3]	7	1.33333	0	2	3	3.33333	0	1	0	7.5
K00161	PDHA, pdhA; pyruvate dehydrogenase E1 component alpha subunit [EC:1.2.4.1]	207.773	16.86	23.3867	22.6233	32.9967	59.1667	27.75	117	74.3367	151.948
K00162	PDHB, pdhB; pyruvate dehydrogenase E1 component beta subunit [EC:1.2.4.1]	200.773	16.86	21.72	22.4	32.8867	58.8333	28.75	112.333	74.3367	145.115
K00163	aceE; pyruvate dehydrogenase E1 component [EC:1.2.4.1]	160.227	7.19333	15.61	11.6767	16.42	36.09	39.1167	93.7333	55.8233	80.5
K00164	OGDH, sucA; 2-oxoglutarate dehydrogenase E1 component [EC:1.2.4.2]	177.64	11.86	22.0533	16.0667	26.9767	55.7	33.7833	85.0667	68.9367	114.765
K00166	BCKDHA, bkdA1; 2-oxoisovalerate dehydrogenase E1 component alpha subunit [EC:1.2.4.4]	62.0267	4.33333	12	10.4467	11	19.1667	6.83333	18.3333	15.0567	39.8467
K00167	BCKDHB, bkdA2; 2-oxoisovalerate dehydrogenase E1 component beta subunit [EC:1.2.4.4]	68.0267	4.33333	12	10.89	11	19.1667	6.83333	18.3333	15.0567	44.68
K00169	porA; pyruvate ferredoxin oxidoreductase alpha subunit [EC:1.2.7.1]	7	0	0	0	1.33333	2.66667	0	12.3333	2	7
K00170	porB; pyruvate ferredoxin oxidoreductase beta subunit [EC:1.2.7.1]	6.33333	0	0	0	1.33333	2.66667	0	12.3333	2	5.66667
K00171	porD; pyruvate ferredoxin oxidoreductase delta subunit [EC:1.2.7.1]	0	0	0	0	0	0	0	1	1	1
K00172	porG; pyruvate ferredoxin oxidoreductase gamma subunit [EC:1.2.7.1]	7	0	0	0	1.33333	2.66667	0	12.3333	2	6.5
K00174	korA, oorA, oforA; 2-oxoglutarate/2-oxoacid ferredoxin oxidoreductase subunit alpha [EC:1.2.7.3 1.2.7.11]	110.61	2.66667	16.4433	16.3333	23.7767	34.5567	8.5	92.6667	63.9467	99.3833
K00175	korB, oorB, oforB; 2-oxoglutarate/2-oxoacid ferredoxin oxidoreductase subunit beta [EC:1.2.7.3 1.2.7.11]	107.61	2.66667	16.4433	16.3333	23.7767	34.5567	8.5	92.6667	63.9467	99.7167
K00176	korD, oorD; 2-oxoglutarate ferredoxin oxidoreductase subunit delta [EC:1.2.7.3]	14.5833	0	1.66667	0.666667	2.33333	1.33333	0	28.6667	10.8333	7.46667
K00177	korC, oorC; 2-oxoglutarate ferredoxin oxidoreductase subunit gamma [EC:1.2.7.3]	15.25	0	1.66667	0.666667	2.33333	2	0	28.6667	10.8333	9.3
K00179	iorA; indolepyruvate ferredoxin oxidoreductase, alpha subunit [EC:1.2.7.8]	2	0	1	0	0.666667	4	1.33333	7.16667	5	13.1667
K00180	iorB; indolepyruvate ferredoxin oxidoreductase, beta subunit [EC:1.2.7.8]	2	0	3	1	0.666667	4	1.33333	7.16667	5	14.3333
K00183	K00183; prokaryotic molybdopterin-containing oxidoreductase family, molybdopterin binding subunit	0	0	0	0	0	0	0	0	0	0
K00184	K00184; prokaryotic molybdopterin-containing oxidoreductase family, iron-sulfur binding subunit	50.22	3.33333	12.8867	5.78	11	16.5	4.33333	25	30.1133	45.1667
K00185	K00185; prokaryotic molybdopterin-containing oxidoreductase family, membrane subunit	48.8867	3.33333	13.5533	6.78	9.66667	14.5	3.33333	23.6667	30.1133	42.7783
K00186	vorA; 2-oxoisovalerate ferredoxin oxidoreductase, alpha subunit [EC:1.2.7.7]	0	0	0	0	0	0	0	0	0	0
K00187	vorB; 2-oxoisovalerate ferredoxin oxidoreductase, beta subunit [EC:1.2.7.7]	0	0	0	0	0	0	0	0	0	0.333333
K00188	vorD; 2-oxoisovalerate ferredoxin oxidoreductase, delta subunit [EC:1.2.7.7]	0	0	0	0	0	0	0	0	0	0
K00192	cdhA; acetyl-CoA decarbonylase/synthase complex subunit alpha [EC:1.2.7.4]	0	0	0	0	0	0	0	0	0	0
K00193	cdhC; acetyl-CoA decarbonylase/synthase complex subunit beta [EC:2.3.1.-]	0	0	0	0	0	0	0	0	0	0
K00194	cdhD, acsD; acetyl-CoA decarbonylase/synthase complex subunit delta [EC:2.1.1.245]	0	0	0	0	0	0	0	0	0	0.333333
K00195	cdhB; acetyl-CoA decarbonylase/synthase complex subunit epsilon	0	0	0	0	0	0	0	0	0	0
K00196	cooF; anaerobic carbon-monoxide dehydrogenase iron sulfur subunit	0	0	0	0	0	0.333333	0	0	0	0.333333
K00197	cdhE, acsC; acetyl-CoA decarbonylase/synthase complex subunit gamma [EC:2.1.1.245]	0	0	0	0	0	0	0	6.16667	0	0.833333
K00198	cooS, acsA; anaerobic carbon-monoxide dehydrogenase catalytic subunit [EC:1.2.7.4]	1.33333	0	0	0	0	0	0	6.16667	0	1.33333
K00200	fwdA, fmdA; formylmethanofuran dehydrogenase subunit A [EC:1.2.7.12]	13.61	0.333333	0.776667	0	1	4.22333	1.66667	0	8.55667	7.91667
K00201	fwdB, fmdB; formylmethanofuran dehydrogenase subunit B [EC:1.2.7.12]	12.9433	0.333333	0.776667	0	1	4.22333	1.66667	0	8.55667	7.91667
K00202	fwdC, fmdC; formylmethanofuran dehydrogenase subunit C [EC:1.2.7.12]	12.9433	0.333333	0.776667	0	1	4.22333	1.66667	0	8.55667	7.91667
K00203	fwdD, fmdD; formylmethanofuran dehydrogenase subunit D [EC:1.2.7.12]	0	0	0	0	0	0	0	0	0	0
K00205	fwdF, fmdF; 4Fe-4S ferredoxin	0	0	0	0	0	0	0	0	0	0
K00208	fabI; enoyl-[acyl-carrier protein] reductase I [EC:1.3.1.9 1.3.1.10]	220.91	17.6667	32.9967	21.89	37.11	56.11	49	127	94.7267	152.44
K00209	fabV, ter; enoyl-[acyl-carrier protein] reductase / trans-2-enoyl-CoA reductase (NAD+) [EC:1.3.1.9 1.3.1.44]	19.8667	3.05333	0.5	2.35333	0.866667	22.8667	6.7	9.4	10.7667	10.9067
K00210	E1.3.1.12; prephenate dehydrogenase [EC:1.3.1.12]	3.08333	0	0	0	0	0	0	0	0	0.0416667
K00211	TYR1; prephenate dehydrogenase (NADP+) [EC:1.3.1.13]	0	0.666667	0	0	0	0	0	0	0	0
K00213	DHCR7; 7-dehydrocholesterol reductase [EC:1.3.1.21]	0	0	0	0	0	0	0	0	0	0
K00214	BLVRA, bvdR; biliverdin reductase [EC:1.3.1.24]	21.3333	1	0	0	0	1	2.66667	19.6667	3	4.33333
K00215	dapB; 4-hydroxy-tetrahydrodipicolinate reductase [EC:1.17.1.8]	241.89	14.86	32.3867	25.5667	41.6433	72.7	42.6167	144.567	103.66	168.732
K00216	entA; 2,3-dihydro-2,3-dihydroxybenzoate dehydrogenase [EC:1.3.1.28]	22.31	1.33333	0	1.33333	2.53333	3.03333	7.2	14.4	6.15667	9.06667
K00217	E1.3.1.32; maleylacetate reductase [EC:1.3.1.32]	3	0	0.333333	0	0	1.66667	1.33333	1	0.333333	1
K00218	por; protochlorophyllide reductase [EC:1.3.1.33]	21.3333	1	0	0	0	1	2.66667	19.6667	3	4.33333
K00219	fadH; 2,4-dienoyl-CoA reductase (NADPH2) [EC:1.3.1.34]	106.617	3.52667	8.83333	5.51	8.97667	21.0333	28.1167	57.4	34.1	29.0283
K00220	tyrC; cyclohexadieny/prephenate dehydrogenase [EC:1.3.1.43 1.3.1.12]	27.6367	3.33333	4	1.66667	6.33333	5	3.83333	0	2.89	14.125
K00221	E4.99.1.2; alkylmercury lyase [EC:4.99.1.2]	0	0	0	0	0	0	0	0	0	0
K00222	TM7SF2, ERG24; Delta14-sterol reductase [EC:1.3.1.70]	0	0	0	0	0	0	0	0	0	0.5
K00226	pyrD; dihydroorotate dehydrogenase (fumarate) [EC:1.3.98.1]	23.5	0	2	0.666667	1.33333	4	2.66667	24.6667	19.8333	16.8333
K00227	SC5DL, ERG3; Delta7-sterol 5-desaturase [EC:1.14.19.20]	0	0	0.5	0	0	0.333333	0	0	0	1.08333
K00228	CPOX, hemF; coproporphyrinogen III oxidase [EC:1.3.3.3]	145.197	8.86	14.2767	6.51	13.2	29.4767	32.6167	68.4	55.5467	62.6533
K00230	hemG; menaquinone-dependent protoporphyrinogen oxidase [EC:1.3.5.3]	14.95	1.52667	0.666667	2.51	1.53333	11.0333	2.78333	20.0667	9.93333	5.52833
K00231	PPOX, hemY; protoporphyrinogen/coproporphyrinogen III oxidase [EC:1.3.3.4 1.3.3.15]	51.2767	5.66667	6.44333	10.0567	14.4433	23.7233	4.33333	36.6667	24.39	64.2167
K00232	E1.3.3.6, ACOX1, ACOX3; acyl-CoA oxidase [EC:1.3.3.6]	17.5	1.33333	1.66667	2.16667	6.11	5	1	12.3333	2.66667	19.75
K00239	sdhA, frdA; succinate dehydrogenase / fumarate reductase, flavoprotein subunit [EC:1.3.5.1 1.3.5.4]	248.113	12.86	27.3867	24.5667	33.8633	65.7	43.95	163.233	108.103	159.148
K00240	sdhB, frdB; succinate dehydrogenase / fumarate reductase, iron-sulfur subunit [EC:1.3.5.1 1.3.5.4]	257.447	12.86	27.3867	24.5667	33.8633	65.7	43.95	161.233	114.437	166.315
K00241	sdhC, frdC; succinate dehydrogenase / fumarate reductase, cytochrome b subunit	224.613	12.86	26.0533	21.4567	27.7533	56.0333	42.2833	139.233	97.1033	138.648
K00242	sdhD, frdD; succinate dehydrogenase / fumarate reductase, membrane anchor subunit	121.477	8.19333	12.5	6.51	13.31	29.0333	30.95	53.0667	37.49	59.07
K00243	K00243; uncharacterized protein	35.9433	4.19333	6.11	7.4	4	21.11	10.5833	15	31.89	32.79
K00244	frdA; fumarate reductase flavoprotein subunit [EC:1.3.5.4]	6.95	4.86	2.66667	4.17667	6.2	18.0333	3.78333	5.06667	3.26667	19.2783
K00245	frdB; fumarate reductase iron-sulfur subunit [EC:1.3.5.4]	2.78333	1.52667	1.33333	1.17667	0.866667	12.0333	3.78333	4.73333	3.26667	3.945
K00246	frdC; fumarate reductase subunit C	2.78333	1.52667	1.33333	1.17667	0.866667	12.0333	3.78333	4.73333	3.26667	3.945
K00247	frdD; fumarate reductase subunit D	1.11667	1.52667	1.33333	1.17667	0.866667	12.0333	3.78333	4.73333	3.26667	3.27833
K00248	ACADS, bcd; butyryl-CoA dehydrogenase [EC:1.3.8.1]	104	4.66667	23.3333	9.44667	16.6667	24.3333	32.3333	72.6667	41.7233	77.6667
K00249	ACADM, acd; acyl-CoA dehydrogenase [EC:1.3.8.7]	445.693	15.6667	39.6667	35.2267	79.8867	102.333	66.1667	204	83.2233	279.042
K00252	GCDH, gcdH; glutaryl-CoA dehydrogenase [EC:1.3.8.6]	154.58	11.3333	15.3867	8.89	19.11	30.72	30.1667	69.3333	54.3367	90.0983
K00253	IVD, ivd; isovaleryl-CoA dehydrogenase [EC:1.3.8.4]	103.36	6.38667	11.1667	6.91	9.33333	25.1667	27	41.6667	33.2233	43.1317
K00254	DHODH, pyrD; dihydroorotate dehydrogenase [EC:1.3.5.2]	162.53	9.52667	15.9433	10.2333	21.31	36.1433	34.2833	87.0667	68.7133	84.9317
K00255	ACADL; long-chain-acyl-CoA dehydrogenase [EC:1.3.8.8]	7.33333	0	1.66667	0	6	2.66667	2.5	1	0	9.16667
K00256	E1.3.99.16; isoquinoline 1-oxidoreductase [EC:1.3.99.16]	20.6667	0	0	0	1	0	0	0	0	0
K00257	mbtN, fadE14; acyl-ACP dehydrogenase [EC:1.3.99.-]	538.353	22.9133	55.44	37.9767	74.2133	124.107	115.25	283	155.113	319.582
K00259	ald; alanine dehydrogenase [EC:1.4.1.1]	157.053	10.1933	12.3867	13.7333	25.7767	60.8333	14.4167	101.833	59.3367	103.198
K00260	gudB, rocG; glutamate dehydrogenase [EC:1.4.1.2]	10.1667	2.33333	3	5.33333	4	8	0	0	7	18.6667
K00261	GLUD1_2, gdhA; glutamate dehydrogenase (NAD(P)+) [EC:1.4.1.3]	93.22	4.33333	13.22	8.55667	7.77667	22.1667	12.6667	70.6667	43.4467	60.6117
K00262	E1.4.1.4, gdhA; glutamate dehydrogenase (NADP+) [EC:1.4.1.4]	85.42	10.3333	9.77667	12.5	8.86667	34.4767	25.2	60.7333	49.6567	66.715
K00263	E1.4.1.9; leucine dehydrogenase [EC:1.4.1.9]	105.943	3.33333	5.94333	6.89	8.66667	15.11	16.8333	23	31.8333	47.5283
K00265	gltB; glutamate synthase (NADPH/NADH) large chain [EC:1.4.1.13 1.4.1.14]	164.113	13.0533	19.61	18.2433	24.6433	64.4233	35.3667	90.7333	67.1033	101.97
K00266	gltD; glutamate synthase (NADPH/NADH) small chain [EC:1.4.1.13 1.4.1.14]	269.777	18.3867	34.3867	29.8	33.42	84.8667	60.2	174.9	110.66	183.335
K00270	pdh; phenylalanine dehydrogenase [EC:1.4.1.20]	0	0	0.666667	0	0	0	0	0	0	2.33333
K00271	vdh; valine dehydrogenase (NAD+) [EC:1.4.1.23]	9.66667	0	1	1.66667	1.77667	2.66667	0.666667	5.33333	0	11.5
K00273	DAO, aao; D-amino-acid oxidase [EC:1.4.3.3]	14.3333	0	1	1.66667	1.77667	3.66667	0.666667	10	0	10.5
K00274	MAO, aofH; monoamine oxidase [EC:1.4.3.4]	66.6667	3.33333	11.3333	10.3333	10.7767	14.3333	20.1667	74	19.7233	47.5
K00275	pdxH, PNPO; pyridoxamine 5'-phosphate oxidase [EC:1.4.3.5]	185.64	9.19333	19.3867	9.73333	22.0867	38.3667	39.95	108.067	66.6033	93.1817
K00276	AOC3, AOC2, tynA; primary-amine oxidase [EC:1.4.3.21]	23	1.33333	0.333333	0	2.11	3.5	3	7.66667	0.333333	11
K00278	nadB; L-aspartate oxidase [EC:1.4.3.16]	191.947	7.86	24.7767	20.4	23.9767	58.4233	34.95	126.567	82.0467	132.453
K00280	LOXL2_3_4; lysyl oxidase-like protein 2/3/4 [EC:1.4.3.-]	2.33333	0	0	0	0	1	0	2	2	3
K00281	GLDC, gcvP; glycine dehydrogenase [EC:1.4.4.2]	149.863	6.86	14.61	7.01	11.6433	41.31	47.1167	98.7333	64.2133	77.265
K00282	gcvPA; glycine dehydrogenase subunit 1 [EC:1.4.4.2]	88.6933	6	14.7767	15.2233	17.6667	31.39	2.66667	55.8333	27.5567	67.9167
K00283	gcvPB; glycine dehydrogenase subunit 2 [EC:1.4.4.2]	88.6933	6	14.7767	15.2233	17.6667	31.39	2.16667	55.8333	27.5567	68.25
K00284	E1.4.7.1; glutamate synthase (ferredoxin) [EC:1.4.7.1]	60.0533	2.33333	5.55333	3.33333	5.66667	17.8333	2.66667	48.6667	15.2233	31.695
K00285	dadA; D-amino-acid dehydrogenase [EC:1.4.5.1]	279.86	14.72	38.4433	21.6867	21.8667	48.4233	78.2	144.733	111.217	139.073
K00286	proC; pyrroline-5-carboxylate reductase [EC:1.5.1.2]	258.917	15.1933	32.1633	29.5667	35.9767	73.81	46.6167	162.9	111.66	175.26
K00287	DHFR, folA; dihydrofolate reductase [EC:1.5.1.3]	145.503	10.86	19.61	13.2333	23.5333	46.31	32.6167	72.7333	76.27	99.5933
K00288	MTHFD; methylenetetrahydrofolate dehydrogenase (NADP+) / methenyltetrahydrofolate cyclohydrolase / formyltetrahydrofolate synthetase [EC:1.5.1.5 3.5.4.9 6.3.4.3]	6.83333	0	0.666667	0.666667	0	0	0	15.3333	5	1.33333
K00290	LYS1; saccharopine dehydrogenase (NAD+, L-lysine forming) [EC:1.5.1.7]	10.25	2	0	1.33333	2.33333	3.66667	1	1	6.16667	10.8
K00293	LYS9; saccharopine dehydrogenase (NADP+, L-glutamate forming) [EC:1.5.1.10]	4.33333	0	0.666667	0	0	1.33333	1	0	4.89	0
K00294	E1.2.1.88; 1-pyrroline-5-carboxylate dehydrogenase [EC:1.2.1.88]	51.2767	3.33333	8.11	9.22333	11.11	13.7767	3.33333	29	33.2233	57.445
K00297	metF, MTHFR; methylenetetrahydrofolate reductase (NADPH) [EC:1.5.1.20]	229.193	11.1933	18.0533	15.01	27.0867	57.7	45.2833	139.9	90.4367	125.482
K00298	ceo; N5-(carboxyethyl)ornithine synthase [EC:1.5.1.24]	0	0	0	0	0	0	0	0	0	0
K00299	ssuE; FMN reductase [EC:1.5.1.38]	140.117	8.33333	19	13.3333	20.1967	32.0333	45.7	116.067	51.9333	106.442
K00301	E1.5.3.1; sarcosine oxidase [EC:1.5.3.1]	24.0267	3.66667	3.77667	1.66667	6.66667	11.89	2.66667	12	3.39	21.4583
K00302	soxA; sarcosine oxidase, subunit alpha [EC:1.5.3.1]	64.1933	2.66667	3	0.89	1.11	6.33333	19.1667	23.6667	20.89	25.375
K00303	soxB; sarcosine oxidase, subunit beta [EC:1.5.3.1]	128.86	4.66667	10	3.89	9.88667	19.1667	30.6667	60	41.0567	66.625
K00304	soxD; sarcosine oxidase, subunit delta [EC:1.5.3.1]	57.5267	2	2.33333	0.666667	0.333333	6.33333	18.1667	23.6667	19.89	19.2083
K00305	soxG; sarcosine oxidase, subunit gamma [EC:1.5.3.1]	57.5267	2	2.33333	0.666667	0.443333	6.33333	17.6667	23.6667	19.89	18.7083
K00306	PIPOX; sarcosine oxidase / L-pipecolate oxidase [EC:1.5.3.1 1.5.3.7]	0	0	0	0	0	0	0	0	0	2.16667
K00311	ETFDH; electron-transferring-flavoprotein dehydrogenase [EC:1.5.5.1]	123.58	7.05333	12.5	7.68667	10.6667	26.1667	27	54	35.2233	46.465
K00313	fixC; electron transfer flavoprotein-quinone oxidoreductase [EC:1.5.5.-]	5.5	0	1.66667	0	1.33333	2.33333	0	2	1.33333	6.58333
K00315	DMGDH; dimethylglycine dehydrogenase [EC:1.5.8.4]	12.3333	0.666667	0	0	0	0	6.66667	0	8.66667	0
K00316	spdH; spermidine dehydrogenase [EC:1.5.99.6]	0	0	0	0	0	0	0	0	0	0
K00317	dmd-tmd; dimethylamine/trimethylamine dehydrogenase [EC:1.5.8.1 1.5.8.2]	0.0833333	0	0	0	0	0	0	0	0	0.0416667
K00318	PRODH; proline dehydrogenase [EC:1.5.-.-]	52.7767	5	7.44333	10.6667	14.7767	19.61	3.33333	30.3333	37.6133	67.3617
K00319	mtd; methylenetetrahydromethanopterin dehydrogenase [EC:1.5.98.1]	0	0	0	0	0	0	0	0	0	0
K00320	mer; 5,10-methylenetetrahydromethanopterin reductase [EC:1.5.98.2]	25	0	0.666667	2.33333	0	0	0	15.3333	5	14.5
K00322	sthA, udhA; NAD(P) transhydrogenase [EC:1.6.1.1]	64.3933	1.86	3.44333	3.73333	3.97667	17.2567	16.1167	18.4	18.49	20.4167
K00324	pntA; NAD(P) transhydrogenase subunit alpha [EC:1.6.1.2]	299.557	12.5267	34.3333	17.1767	39.2	66.8667	64.1167	153.733	79.7133	150.528
K00325	pntB; NAD(P) transhydrogenase subunit beta [EC:1.6.1.2]	180.087	7.86	17.8333	9.51	22.8667	41.0333	33.6167	93.4	47.8233	86.9033
K00329	E1.6.5.3; NADH dehydrogenase [EC:1.6.5.3]	0	0	0	0	0	0	0	0	0	0
K00330	nuoA; NADH-quinone oxidoreductase subunit A [EC:1.6.5.3]	236.53	8.66667	33.3867	21.89	30.0867	49.48	49.0333	186.567	106.773	149.742
K00331	nuoB; NADH-quinone oxidoreductase subunit B [EC:1.6.5.3]	222.42	7	26.9433	18.89	29.42	43.59	38.7	158.233	96.55	133.297
K00332	nuoC; NADH-quinone oxidoreductase subunit C [EC:1.6.5.3]	170.637	7	24.9433	17.5567	28.11	41.89	25.8333	142.833	82.8933	117.597
K00333	nuoD; NADH-quinone oxidoreductase subunit D [EC:1.6.5.3]	177.97	7	24.9433	18.2233	28.22	41.89	26.5	142.5	82.8933	123.263
K00334	nuoE; NADH-quinone oxidoreductase subunit E [EC:1.6.5.3]	205.67	6.33333	26.2767	19.2233	29.31	43.9233	36.3667	167.4	93.3267	120.275
K00335	nuoF; NADH-quinone oxidoreductase subunit F [EC:1.6.5.3]	217.67	6.33333	25.61	20.5567	29.42	45.2567	38.7	157.4	85.66	131.108
K00336	nuoG; NADH-quinone oxidoreductase subunit G [EC:1.6.5.3]	191.837	6.33333	21.2767	14.89	27.9767	37.4233	36.3667	125.4	76.3267	115.858
K00337	nuoH; NADH-quinone oxidoreductase subunit H [EC:1.6.5.3]	224.197	7.33333	27.3867	19.1133	29.42	44.48	38.7	163.567	98.1067	134.242
K00338	nuoI; NADH-quinone oxidoreductase subunit I [EC:1.6.5.3]	225.53	7.33333	26.0533	17.89	30.0867	46.8133	39.7	160.233	98.1067	136.742
K00339	nuoJ; NADH-quinone oxidoreductase subunit J [EC:1.6.5.3]	219.753	7	26.9433	18.89	29.42	43.59	38.7	158.233	95.8833	129.52
K00340	nuoK; NADH-quinone oxidoreductase subunit K [EC:1.6.5.3]	223.197	7.33333	28.72	18.89	30.0867	45.8133	39.7	158.233	98.1067	137.408
K00341	nuoL; NADH-quinone oxidoreductase subunit L [EC:1.6.5.3]	222.197	7.33333	27.3867	18.89	28.7533	44.48	38.7	157.567	87.44	133.408
K00342	nuoM; NADH-quinone oxidoreductase subunit M [EC:1.6.5.3]	237.473	7.66667	28.83	19.78	30.42	48.7033	40.3667	184.567	107.497	137.158
K00343	nuoN; NADH-quinone oxidoreductase subunit N [EC:1.6.5.3]	222.863	7.33333	27.3867	18.89	29.42	44.48	38.7	158.233	96.7733	130.408
K00344	qor, CRYZ; NADPH2:quinone reductase [EC:1.6.5.5]	338.057	18.86	38.0533	27.07	48.9733	77.5333	69.45	199.733	106.103	231.195
K00346	nqrA; Na+-transporting NADH:ubiquinone oxidoreductase subunit A [EC:1.6.5.8]	38.4767	1.86	0.443333	1.17667	2.86667	13.31	9.45	4.73333	22.9333	6.85667
K00347	nqrB; Na+-transporting NADH:ubiquinone oxidoreductase subunit B [EC:1.6.5.8]	38.31	3.19333	0.443333	2.17667	2.86667	23.6433	9.45	4.73333	22.9333	6.85667
K00348	nqrC; Na+-transporting NADH:ubiquinone oxidoreductase subunit C [EC:1.6.5.8]	38.31	1.86	0.443333	1.17667	2.86667	13.31	9.45	4.73333	22.9333	6.85667
K00349	nqrD; Na+-transporting NADH:ubiquinone oxidoreductase subunit D [EC:1.6.5.8]	38.31	1.86	0.443333	1.17667	2.86667	13.31	9.45	4.73333	22.9333	6.85667
K00350	nqrE; Na+-transporting NADH:ubiquinone oxidoreductase subunit E [EC:1.6.5.8]	38.31	1.86	0.443333	1.17667	2.86667	13.31	9.45	4.73333	22.9333	6.85667
K00351	nqrF; Na+-transporting NADH:ubiquinone oxidoreductase subunit F [EC:1.6.5.8]	38.31	1.86	0.443333	1.17667	2.86667	11.6433	9.45	4.73333	22.9333	5.85667
K00354	E1.6.99.1; NADPH2 dehydrogenase [EC:1.6.99.1]	0.666667	1	2	3.33333	0	4.33333	0	0	3.33333	9.33333
K00355	NQO1; NAD(P)H dehydrogenase (quinone) [EC:1.6.5.2]	73.6667	0.333333	5.66667	1.66667	0.666667	8	23.5	42.6667	24.5567	24.1667
K00356	E1.6.99.3; NADH dehydrogenase [EC:1.6.99.3]	64.6367	3.33333	8	4	9	7.83333	7.83333	39.3333	22.5567	34.9583
K00360	nasB; assimilatory nitrate reductase electron transfer subunit [EC:1.7.99.-]	9.66667	0	1.66667	1.66667	5.11	2.66667	0.666667	4.66667	0	12.5
K00362	nirB; nitrite reductase (NADH) large subunit [EC:1.7.1.15]	154.81	6.72	20.11	11.3533	16.9767	39.7567	40.3667	91.0667	62.38	83.795
K00363	nirD; nitrite reductase (NADH) small subunit [EC:1.7.1.15]	125.92	7.05333	22.5533	12.02	15.6433	48.1467	44.7	97.7333	58.1033	84.6567
K00364	E1.7.1.7, guaC; GMP reductase [EC:1.7.1.7]	5.45	3.19333	1	2.84333	3.53333	16.0333	2.78333	5.73333	5.93333	14.945
K00365	uaZ; urate oxidase [EC:1.7.3.3]	9.33333	1.33333	0	0	0.11	2.66667	1.66667	10	2.66667	6.16667
K00366	nirA; ferredoxin-nitrite reductase [EC:1.7.7.1]	35.3333	1	0	0.666667	1	2	2.66667	19.6667	3	8.695
K00367	narB; ferredoxin-nitrate reductase [EC:1.7.7.2]	30.6667	1	0.666667	0	1.33333	1.66667	2.66667	19.6667	4.22333	8
K00368	nirK; nitrite reductase (NO-forming) [EC:1.7.2.1]	26.86	1.33333	5.83333	3	3	7	11.3333	33	14.4467	18.7083
K00370	narG, narZ, nxrA; nitrate reductase / nitrite oxidoreductase, alpha subunit [EC:1.7.5.1 1.7.99.-]	69.3933	1.33333	8	3.66667	7.2	9.53333	22.8667	49.4	20.49	32.9417
K00371	narH, narY, nxrB; nitrate reductase / nitrite oxidoreductase, beta subunit [EC:1.7.5.1 1.7.99.-]	69.3933	1.33333	8	3.66667	7.2	9.53333	22.8667	49.4	20.49	32.9417
K00372	nasA; assimilatory nitrate reductase catalytic subunit [EC:1.7.99.-]	91.86	3.86	12.11	7.17667	9.11	25.2233	22.5833	47	31.2233	51.3783
K00373	narJ, narW; nitrate reductase molybdenum cofactor assembly chaperone NarJ/NarW	69.3933	1.33333	8	3.66667	7.31	9.53333	22.8667	49.4	20.49	33.1083
K00374	narI, narV; nitrate reductase gamma subunit [EC:1.7.5.1 1.7.99.-]	69.3933	1.33333	8	3.66667	7.2	9.53333	22.8667	49.4	20.49	32.4417
K00375	K00375; GntR family transcriptional regulator / MocR family aminotransferase	259.017	11.86	34.3333	28.68	13.04	47.2667	86.1833	204.867	127.747	171.662
K00376	nosZ; nitrous-oxide reductase [EC:1.7.2.4]	38.11	0	1.66667	0.666667	3	2	5	11.6667	7.78	11.1667
K00380	cysJ; sulfite reductase (NADPH) flavoprotein alpha-component [EC:1.8.1.2]	130.56	7.52667	19	11.51	9.86667	32.7	48.45	94.0667	50.6567	58.9733
K00381	cysI; sulfite reductase (NADPH) hemoprotein beta-component [EC:1.8.1.2]	114.42	5.52667	9.83333	8.06667	9.2	30.5333	26.95	54.7333	42.49	54.4867
K00382	DLD, lpd, pdhD; dihydrolipoamide dehydrogenase [EC:1.8.1.4]	452.64	31.86	59.55	50.7333	67.6167	138.343	88.9833	286.967	201.32	321.222
K00383	GSR, gor; glutathione reductase (NADPH) [EC:1.8.1.7]	113.64	7.19333	8.72	3.51	12.2	23.5867	23.6167	43.0667	23.1567	33.5433
K00384	trxB, TRR; thioredoxin reductase (NADPH) [EC:1.8.1.9]	409.19	32.1933	66.55	55.9	84.0867	125.863	81.95	270.4	208.163	336.442
K00385	asrC; anaerobic sulfite reductase subunit C	0.666667	0	1	0	0	1	0	0	0	3
K00387	SUOX; sulfite oxidase [EC:1.8.3.1]	7.66667	0	0	0	0.666667	0.666667	1	0	0	1.66667
K00389	yidH; putative membrane protein	40.72	4	6.22	3.83333	11.7767	15.5	4.66667	13.6667	5.22333	32.2783
K00390	cysH; phosphoadenosine phosphosulfate reductase [EC:1.8.4.8 1.8.4.10]	164.64	9.19333	16.3867	13.2333	18.6433	46.8667	36.45	105.733	67.9367	105.898
K00392	sir; sulfite reductase (ferredoxin) [EC:1.8.7.1]	38.8867	3.66667	3.55333	2.16667	8.11	10.6667	6.66667	43.3333	20.6133	28.7783
K00394	aprA; adenylylsulfate reductase, subunit A [EC:1.8.99.2]	3.66667	0	0	0	0	0	0	0	0	1
K00395	aprB; adenylylsulfate reductase, subunit B [EC:1.8.99.2]	3.66667	0	0	0	0	0	0	0	0	1
K00399	mcrA; methyl-coenzyme M reductase alpha subunit [EC:2.8.4.1]	0	0	0	0	0	0	0	0	0	0
K00400	K00400; methyl coenzyme M reductase system, component A2	0	0	0	0	0	0	0	0	0	0
K00401	mcrB; methyl-coenzyme M reductase beta subunit [EC:2.8.4.1]	0	0	0	0	0	0	0	0	0	0
K00402	mcrG; methyl-coenzyme M reductase gamma subunit [EC:2.8.4.1]	0	0	0	0	0	0	0	0	0	0
K00404	ccoN; cytochrome c oxidase cbb3-type subunit I [EC:1.9.3.1]	107.443	7.52667	13.8333	8.17667	7.66667	39.8333	35.0833	51.3333	32.89	43.3083
K00405	ccoO; cytochrome c oxidase cbb3-type subunit II	104.11	7.52667	13.5	8.17667	7.66667	36.5	33.75	50.3333	32.5567	42.0867
K00406	ccoP; cytochrome c oxidase cbb3-type subunit III	121.887	9.86	18.2767	9.73333	14.6667	31.2767	34.9167	51.6667	46.28	61.6433
K00407	ccoQ; cytochrome c oxidase cbb3-type subunit IV	102.777	6.19333	12.1667	7.17667	7.66667	26.8333	33.75	50.3333	31.5567	43.5867
K00410	fbcH; ubiquinol-cytochrome c reductase cytochrome b/c1 subunit	4	0	0	0	0	0	0	0	0	2.91667
K00411	UQCRFS1, RIP1, petA; ubiquinol-cytochrome c reductase iron-sulfur subunit [EC:1.10.2.2]	117.22	6.86	12.5	6.51	10.6667	26.1667	27.75	42.6667	35.2233	43.92
K00412	CYTB, petB; ubiquinol-cytochrome c reductase cytochrome b subunit	159.887	6.86	16.8333	9.84333	16	40.8333	26.75	66.6667	35.2233	68.365
K00413	CYC1, CYT1, petC; ubiquinol-cytochrome c reductase cytochrome c1 subunit	115.553	4.86	9.5	4.84333	6.66667	24.1667	26.75	42.6667	35.2233	38.17
K00423	E1.10.3.3; L-ascorbate oxidase [EC:1.10.3.3]	24.6667	0	0	0	1	0	0	0	0	3.16667
K00425	cydA; cytochrome bd ubiquinol oxidase subunit I [EC:1.10.3.14]	262.173	14.3867	29.0533	20.2433	25.8433	53.5667	65.7333	165.3	116.87	143.038
K00426	cydB; cytochrome bd ubiquinol oxidase subunit II [EC:1.10.3.14]	252.507	14.3867	29.0533	18.5767	25.8433	50.5667	65.2333	165.3	116.87	137.705
K00427	lldP, lctP; L-lactate permease	15.6667	0	0	0	0	0.166667	3.66667	5.33333	3.33333	0.666667
K00428	E1.11.1.5; cytochrome c peroxidase [EC:1.11.1.5]	118.827	13.3867	26.83	16.8033	14.3333	57.7233	52.5	90	78.0033	108.33
K00432	gpx; glutathione peroxidase [EC:1.11.1.9]	251.003	12.1933	26.11	20.0667	27.6433	57.09	72.2833	128.067	103.66	138.933
K00433	cpo; non-heme chloroperoxidase [EC:1.11.1.10]	90.97	3.33333	16.1667	7.66667	7.33333	16.6667	29.8333	66	31.3333	43.125
K00435	hemQ; Fe-coproporphyrin III decarboxylase [EC:1.11.1.-]	5.33	2.33333	1.33	1	3	11.6633	0	0	0	3.835
K00436	hoxH; NAD-reducing hydrogenase large subunit [EC:1.12.1.2]	2	0	0.666667	0	0	0	0	15.3333	5	3
K00437	hydB; [NiFe] hydrogenase large subunit [EC:1.12.2.1]	0	0	0	0	0	0	0	0	0	0.333333
K00441	frhB; coenzyme F420 hydrogenase subunit beta [EC:1.12.98.1]	23	1	0	0	0	2	2.66667	29.6667	3	5.83333
K00446	dmpB, xylE; catechol 2,3-dioxygenase [EC:1.13.11.2]	25.61	5.33333	0	5.33333	10.6667	11.5	3.33333	5.33333	1.89	30.9167
K00448	pcaG; protocatechuate 3,4-dioxygenase, alpha subunit [EC:1.13.11.3]	57.86	3.33333	5.33333	4.66667	7.44333	11.6667	14.3333	24	16.5567	32.375
K00449	pcaH; protocatechuate 3,4-dioxygenase, beta subunit [EC:1.13.11.3]	60.3867	3.86	6.11	5.51	9.44333	15.89	16.25	24	23.67	35.115
K00450	E1.13.11.4; gentisate 1,2-dioxygenase [EC:1.13.11.4]	9.66667	1.33333	0.666667	1.33333	2.66667	7.33333	2.66667	2.33333	1.33333	14.5
K00451	HGD, hmgA; homogentisate 1,2-dioxygenase [EC:1.13.11.5]	103.027	6.52667	15.9433	9.06667	17.4433	30.2767	29.0833	54	46.39	67.9617
K00452	HAAO; 3-hydroxyanthranilate 3,4-dioxygenase [EC:1.13.11.6]	25.5267	0.333333	1.61	1.66667	1	1.44333	5.33333	6.33333	14.39	7.73667
K00453	TDO2, kynA; tryptophan 2,3-dioxygenase [EC:1.13.11.11]	73.7767	7.33333	15.2767	11.89	16.4433	24.61	18	42	38.7233	71.25
K00455	hpaD, hpcB; 3,4-dihydroxyphenylacetate 2,3-dioxygenase [EC:1.13.11.15]	8	0	1.66667	0.666667	0	0.833333	4	12	6	4.5
K00456	CDO1; cysteine dioxygenase [EC:1.13.11.20]	0.666667	0	0	0.666667	0	0	0	0	0	0.333333
K00457	HPD, hppD; 4-hydroxyphenylpyruvate dioxygenase [EC:1.13.11.27]	165.22	11.86	21.3867	11.4	20.5533	40.1667	40.4167	92.6667	72.28	96.67
K00459	ncd2, npd; nitronate monooxygenase [EC:1.13.12.16]	244.053	10.5267	22.5	19.6233	21.8867	45.1667	55.0833	97.3333	82.1133	136.032
K00463	IDO, INDO; indoleamine 2,3-dioxygenase [EC:1.13.11.52]	1.66667	0	0	0	0	0	0.5	0	0	0.333333
K00464	diox1; all-trans-8'-apo-beta-carotenal 15,15'-oxygenase [EC:1.13.11.75]	24	1	0	0	0	1	2.66667	19.6667	3	9.16667
K00466	iaaM; tryptophan 2-monooxygenase [EC:1.13.12.3]	11	0	2	0.666667	0.11	2.33333	6	12.6667	6.33333	5.5
K00467	E1.13.12.4; lactate 2-monooxygenase [EC:1.13.12.4]	2.66667	0	0.666667	0	5	1	0	0	1.22333	1.83333
K00469	MIOX; inositol oxygenase [EC:1.13.99.1]	0	0.666667	0	0	0	0	0	0	1.22333	0.445
K00471	E1.14.11.1; gamma-butyrobetaine dioxygenase [EC:1.14.11.1]	13.3333	0	2	0.666667	0	2.33333	6.33333	12.6667	6.33333	5.5
K00472	P4HA; prolyl 4-hydroxylase [EC:1.14.11.2]	11	2	3	4.33333	7.66667	12	1	0	1.33333	19.6667
K00476	ASPH; aspartate beta-hydroxylase [EC:1.14.11.16]	0	0	0	0	0	0	0	0	0	0
K00477	PHYH; phytanoyl-CoA hydroxylase [EC:1.14.11.18]	19.6667	1.33333	4.66667	3	0	4.33333	9.33333	24	15	16.5
K00479	gbcA; glycine betaine catabolism A	43.5267	0.666667	2	0.666667	1.11	2.33333	13.1667	23.6667	14.89	16.0417
K00480	E1.14.13.1; salicylate hydroxylase [EC:1.14.13.1]	21.5267	4	3	3	7	9.33333	5.66667	10.3333	2.89	25.9583
K00481	pobA; p-hydroxybenzoate 3-monooxygenase [EC:1.14.13.2]	57.5267	3.33333	6	4	9.11	12	13.6667	28.3333	17.5567	33.9583
K00483	hpaB; 4-hydroxyphenylacetate 3-monooxygenase [EC:1.14.14.9]	13.0333	1.66667	1	1.66667	3.86667	5.2	3.03333	9.4	4.6	15.8167
K00484	hpaC; flavin reductase (NADH) [EC:1.5.1.36]	5.2	0	0.333333	0	0.2	2.03333	3.86667	5.73333	2.6	2.4
K00486	KMO; kynurenine 3-monooxygenase [EC:1.14.13.9]	34.4433	1.66667	6.27667	4.66667	1	5.77667	13.6667	30.3333	24.39	18.695
K00491	nos; nitric-oxide synthase, bacterial [EC:1.14.14.47]	14.3333	2.33333	2	6.33333	2.33333	7	0	10	2.33333	21.8333
K00493	E1.14.14.1; unspecific monooxygenase [EC:1.14.14.1]	2.33333	0	0	0	0.22	0	3.33333	0	0	0
K00496	alkB1_2, alkM; alkane 1-monooxygenase [EC:1.14.15.3]	51	1.33333	1.66667	0	5.33333	4.66667	6.83333	2	13.5	11.8333
K00499	CMO; choline monooxygenase [EC:1.14.15.7]	14.3333	0	0.333333	0	0	2.33333	1.33333	1	6.66667	7.88833
K00500	phhA, PAH; phenylalanine-4-hydroxylase [EC:1.14.16.1]	55.6933	2.52667	4.61	2.51	6	17.9433	14.0833	19	24.8333	22.295
K00501	TH; tyrosine 3-monooxygenase [EC:1.14.16.2]	0	0	0	0.666667	0	0	0	0	0	0.333333
K00505	TYR; tyrosinase [EC:1.14.18.1]	0	0	0	0	0.22	0	0.666667	5.33333	0	0
K00507	SCD, desC; stearoyl-CoA desaturase (Delta-9 desaturase) [EC:1.14.19.1]	178.47	8.86	18.3867	12.29	6.77667	38.28	36.5833	136.333	50.56	82.1817
K00508	E1.14.19.3; linoleoyl-CoA desaturase [EC:1.14.19.3]	54.4767	1.66667	9.61	4.66667	13.31	9.97667	20.8667	44.7333	32.66	42.65
K00510	HMOX1; heme oxygenase 1 [EC:1.14.14.18]	28.11	1.33333	0.443333	0.5	1.44333	4.11	3.33333	35	3	8.36167
K00511	SQLE, ERG1; squalene monooxygenase [EC:1.14.14.17]	0	0	0	0	0	0	0	0	0	0.721667
K00514	ZDS, crtQ; zeta-carotene desaturase [EC:1.3.5.6]	0	0	0	0	0	0	2.66667	19.6667	5.33333	0.445
K00517	CYP81F; indol-3-yl-methylglucosinolate hydroxylase [EC:1.14.-.-]	44.5533	0.333333	2.11	1.66667	12.9967	3.77667	8	42.3333	7.22333	33.2783
K00518	sodN; nickel superoxide dismutase [EC:1.15.1.1]	9.66667	0	1.66667	1.66667	5.11	4.33333	2.33333	10	2.66667	14.1667
K00520	merA; mercuric reductase [EC:1.16.1.1]	52	0	0	0.5	1.66667	0.166667	8.33333	10	6.66667	2.25
K00523	ascD, ddhD, rfbI; CDP-4-dehydro-6-deoxyglucose reductase, E3 [EC:1.17.1.1]	70.3333	1.33333	8.33333	3.66667	4.33333	11.1667	22.1667	38.6667	30.6667	29.6667
K00524	nrdJ; ribonucleotide reductase, class II [EC:1.17.4.1]	0	0	0	0	0	0	0	0	0	0
K00525	E1.17.4.1A, nrdA, nrdE; ribonucleoside-diphosphate reductase alpha chain [EC:1.17.4.1]	330.227	20.1933	31.9967	33.1233	41.9533	94.1767	53.4833	154.3	124.373	203.673
K00526	E1.17.4.1B, nrdB, nrdF; ribonucleoside-diphosphate reductase beta chain [EC:1.17.4.1]	190.673	10.86	15.0533	16.5667	18.51	43.7333	36.8167	106.133	68.5367	98.8317
K00527	rtpR; ribonucleoside-triphosphate reductase (thioredoxin) [EC:1.17.4.2]	29.0333	2.86	7.66667	4.84333	0.866667	17.3667	16.1167	53.2333	38.6567	29.745
K00528	fpr; ferredoxin/flavodoxin---NADP+ reductase [EC:1.18.1.2 1.19.1.1]	221.697	7.19333	22.2767	16.5667	29.42	55.7567	50.2833	137.9	79.0467	127.208
K00529	hcaD; 3-phenylpropionate/trans-cinnamate dioxygenase ferredoxin reductase component [EC:1.18.1.3]	54.2267	0.666667	4	1.66667	12.8667	17.2	10.3667	36.7333	14.1567	40.9417
K00532	E1.12.7.2; ferredoxin hydrogenase [EC:1.12.7.2]	0.666667	0	0	0	0	0	0	0	0	0.333333
K00533	E1.12.7.2L; ferredoxin hydrogenase large subunit [EC:1.12.7.2]	0	0	0	0	0	0	0	0	0	0.666667
K00534	E1.12.7.2S; ferredoxin hydrogenase small subunit [EC:1.12.7.2]	0	0	0	0	0	0	0	0	0	0
K00537	ARSC1, arsC; arsenate reductase [EC:1.20.4.1]	208.64	11.1933	26.0533	17.29	26.6433	45.92	50.45	79.0667	87.3233	115.043
K00544	BHMT; betaine-homocysteine S-methyltransferase [EC:2.1.1.5]	3	0	0	0	0	0	0	0	0	0
K00545	COMT; catechol O-methyltransferase [EC:2.1.1.6]	2.66667	0	0	0	1	0	0	0	0	0.5
K00547	mmuM, BHMT2; homocysteine S-methyltransferase [EC:2.1.1.10]	33.7	2.33333	6.33333	6.89	7.64333	9.7	4.2	24.7333	17.8233	42.4
K00548	metH, MTR; 5-methyltetrahydrofolate--homocysteine methyltransferase [EC:2.1.1.13]	268.25	13.1933	31.9967	25.7333	36.31	67.9767	50.2833	168.567	137.16	169.677
K00549	metE; 5-methyltetrahydropteroyltriglutamate--homocysteine methyltransferase [EC:2.1.1.14]	187.927	12.0533	22.8333	19.1867	11.8433	53.9	49.2333	119.133	59.09	105.905
K00554	trmD; tRNA (guanine37-N1)-methyltransferase [EC:2.1.1.228]	236.723	12.86	28.3867	24.5667	32.6433	67.0333	41.6167	151.233	105.66	154.315
K00555	TRMT1, trm1; tRNA (guanine26-N2/guanine27-N2)-dimethyltransferase [EC:2.1.1.215 2.1.1.216]	0	0	0	0	0	0	0	1	0	0.5
K00556	trmH; tRNA (guanosine-2'-O-)-methyltransferase [EC:2.1.1.34]	41.5033	2.19333	1.55333	1.4	7.2	13.7533	3.45	4.73333	17.3233	19.9183
K00557	trmA; tRNA (uracil-5-)-methyltransferase [EC:2.1.1.35]	27.7833	1.52667	2.66667	2.51	0.866667	13.0333	12.45	17.4	18.6	9.27833
K00558	DNMT1, dcm; DNA (cytosine-5)-methyltransferase 1 [EC:2.1.1.37]	146.087	9	17.61	11	9.42	24.7567	40.7	133.9	56.8233	72.6467
K00560	thyA, TYMS; thymidylate synthase [EC:2.1.1.45]	144.17	10.1933	18.9433	12.5667	22.2	46.6433	32.6167	71.4	71.6033	100.293
K00561	ermC, ermA; 23S rRNA (adenine-N6)-dimethyltransferase [EC:2.1.1.184]	4.66667	0	0	1.66667	0	0	0	4.66667	1.33333	4.16667
K00563	rlmA1; 23S rRNA (guanine745-N1)-methyltransferase [EC:2.1.1.187]	60.6167	4.52667	2	5.67667	4.31	20.0333	14.1167	31.4	18.2667	29.0283
K00564	rsmC; 16S rRNA (guanine1207-N2)-methyltransferase [EC:2.1.1.172]	126.87	9.38667	9.5	11.1867	9.17667	41.0667	32.9	42.4667	38.98	43.82
K00566	mnmA, trmU; tRNA-uridine 2-sulfurtransferase [EC:2.8.1.13]	238.39	12.86	28.3867	24.5667	32.6433	67.0333	42.1167	151.233	111.827	155.815
K00567	ogt, MGMT; methylated-DNA-[protein]-cysteine S-methyltransferase [EC:2.1.1.63]	240.39	14.86	32.3867	29.1233	31.3067	81.7	48.95	166.567	111.327	177.932
K00568	ubiG; 2-polyprenyl-6-hydroxyphenyl methylase / 3-demethylubiquinone-9 3-methyltransferase [EC:2.1.1.222 2.1.1.64]	137.42	6.86	12.5	8.17667	11.8667	28.5333	32.95	57.7333	42.1567	53.0983
K00569	TPMT, tpmT; thiopurine S-methyltransferase [EC:2.1.1.67]	45.36	1.86	2.94333	1.84333	2.66667	13.4433	9.91667	12.6667	11.6667	8.74
K00570	pmtA; phosphatidylethanolamine/phosphatidyl-N-methylethanolamine N-methyltransferase [EC:2.1.1.17 2.1.1.71]	16.97	5.33333	7.33333	3.33333	9.33333	6.66667	4.33333	0	0.556667	19.0417
K00571	E2.1.1.72; site-specific DNA-methyltransferase (adenine-specific) [EC:2.1.1.72]	100.3	8.33333	15.33	15.0033	8.33333	40.5033	16.6667	78.3333	50.8367	74.3833
K00573	E2.1.1.77, pcm; protein-L-isoaspartate(D-aspartate) O-methyltransferase [EC:2.1.1.77]	258.39	17.5267	39.8867	24.0667	36.9767	61.2	51.6167	126.4	98.4933	152.697
K00574	cfa; cyclopropane-fatty-acyl-phospholipid synthase [EC:2.1.1.79]	294.87	14.1933	37	21.79	46.9533	64.7333	75.65	147.467	83.48	156.678
K00575	cheR; chemotaxis protein methyltransferase CheR [EC:2.1.1.80]	337.78	19.1933	43.3867	34.8467	36.5333	75.6467	87.45	215.9	127.33	186.305
K00577	mtrA; tetrahydromethanopterin S-methyltransferase subunit A [EC:2.1.1.86]	0	0	0	0	0	0	0	0	0	0
K00584	mtrH; tetrahydromethanopterin S-methyltransferase subunit H [EC:2.1.1.86]	0	0	0	0	0	0	0	0	0	0
K00586	DPH5; diphthine methyl ester synthase [EC:2.1.1.314]	0	0	0	0	0	0	0	1	0	0.5
K00588	E2.1.1.104; caffeoyl-CoA O-methyltransferase [EC:2.1.1.104]	16.6667	0	0	3.33333	0.11	0	0.666667	5.33333	0	13.6667
K00590	E2.1.1.113; site-specific DNA-methyltransferase (cytosine-N4-specific) [EC:2.1.1.113]	0	0	1.66667	0	0	0	0	0	0	1.5
K00594	xyoA, aldO; alditol oxidase [EC:1.1.3.41]	9.33333	0	0	1.66667	2.77667	0	0	5.33333	1.22333	5.5
K00595	cobL; precorrin-6Y C5,15-methyltransferase (decarboxylating) [EC:2.1.1.132]	82.1367	6	6.66667	4.66667	14.8867	16	14.1667	51.6667	25.7233	53.9033
K00596	E4.1.1.64; 2,2-dialkylglycine decarboxylase (pyruvate) [EC:4.1.1.64]	9.33333	0	0	1.66667	0	1.33333	0	5.33333	0	8.66667
K00598	tam; trans-aconitate 2-methyltransferase [EC:2.1.1.144]	40.1933	1.33333	5.33333	2.55667	6.11	9.16667	8	24.6667	9.55667	33.375
K00600	glyA, SHMT; glycine hydroxymethyltransferase [EC:2.1.2.1]	328.973	15.72	33.0533	29.41	33.8633	84.7	70.8667	199.233	138.327	188.027
K00601	E2.1.2.2; phosphoribosylglycinamide formyltransferase [EC:2.1.2.2]	1.66667	0	0	0	0	0	0	0	0	0
K00602	purH; phosphoribosylaminoimidazolecarboxamide formyltransferase / IMP cyclohydrolase [EC:2.1.2.3 3.5.4.10]	239.64	12.86	27.72	24.5667	32.6433	67.0333	41.6167	136.9	101.993	157.115
K00603	fctD; glutamate formiminotransferase [EC:2.1.2.5]	12.1667	0	0	1	1.66667	0	0	21.3333	3.33333	7.66667
K00604	MTFMT, fmt; methionyl-tRNA formyltransferase [EC:2.1.2.9]	264.223	16.1933	36.0533	29.2333	38.0867	73.7	50.95	180.9	125.217	181.565
K00605	gcvT, AMT; aminomethyltransferase [EC:2.1.2.10]	262.057	12.86	30.72	25.2333	33.9767	72.3667	52.2833	157.9	107.937	165.348
K00606	panB; 3-methyl-2-oxobutanoate hydroxymethyltransferase [EC:2.1.2.11]	222.447	10.86	23.3867	20.5667	27.9767	61.3667	40.6167	132.9	98.4367	137.148
K00608	pyrBI; aspartate carbamoyltransferase [EC:2.1.3.2]	0	0	0	0	0	0	0	0	0	0
K00609	pyrB, PYR2; aspartate carbamoyltransferase catalytic subunit [EC:2.1.3.2]	245.057	12.86	28.3867	24.5667	32.6433	68.3667	41.6167	152.233	111.993	158.648
K00610	pyrI; aspartate carbamoyltransferase regulatory subunit	6.53333	1.52667	0	1.17667	0.2	10.7	2.78333	5.73333	8.1	5.745
K00611	OTC, argF, argI; ornithine carbamoyltransferase [EC:2.1.3.3]	221.697	9.86	21.11	21.5667	29.31	60.4233	37.6167	132.567	77.2133	127.987
K00612	E2.1.3.-; carbamoyltransferase [EC:2.1.3.-]	69.4433	4	7.44333	4.89	5.44333	7.11	12	28	24	37.5567
K00613	GATM; glycine amidinotransferase [EC:2.1.4.1]	8.33333	0	0	0	0	1	0	2	1.33333	3
K00615	E2.2.1.1, tktA, tktB; transketolase [EC:2.2.1.1]	366.767	16.0533	38.83	35.6333	48.35	106.41	63.3	251.933	180.407	259.047
K00616	E2.2.1.2, talA, talB; transaldolase [EC:2.2.1.2]	271.673	14.86	32.83	27.79	31.9533	71.1767	55.65	179.967	112.427	170.498
K00619	argA; amino-acid N-acetyltransferase [EC:2.3.1.1]	26.3333	1.33333	5.66667	3.33333	2.44333	5	7.16667	40.6667	14.5567	26.6117
K00620	argJ; glutamate N-acetyltransferase / amino-acid N-acetyltransferase [EC:2.3.1.35 2.3.1.1]	191.413	9.66667	23.7767	21.1667	27.4433	51.7233	35.1667	130.5	77.78	128.125
K00621	GNPNAT1, GNA1; glucosamine-phosphate N-acetyltransferase [EC:2.3.1.4]	0	0	0	0	0	0	0	0	0	0
K00622	nat; arylamine N-acetyltransferase [EC:2.3.1.5]	0	0	0	0	0	0	0	1	0	0
K00624	E2.3.1.7; carnitine O-acetyltransferase [EC:2.3.1.7]	0	0	0	0	0	0	0	0	0	0
K00625	E2.3.1.8, pta; phosphate acetyltransferase [EC:2.3.1.8]	45.6667	6	16	13	7.33333	17.3333	18.6667	49	36.8333	55.2583
K00626	E2.3.1.9, atoB; acetyl-CoA C-acetyltransferase [EC:2.3.1.9]	871.077	42.58	103.663	77.09	130.103	202.443	151.083	467.5	277.12	503.275
K00627	DLAT, aceF, pdhC; pyruvate dehydrogenase E2 component (dihydrolipoamide acetyltransferase) [EC:2.3.1.12]	332.47	22.72	35.6633	27.8	38.0867	97.7567	69.3667	155.733	118.607	191.157
K00630	ATS1; glycerol-3-phosphate O-acyltransferase [EC:2.3.1.15]	0	0	0	0	0	0	0	0	0	0
K00631	plsB; glycerol-3-phosphate O-acyltransferase [EC:2.3.1.15]	73.6167	2.19333	3.16667	2.29	2.86667	14.7	17.1167	23.4	22.1567	14.5283
K00632	fadA, fadI; acetyl-CoA acyltransferase [EC:2.3.1.16]	249.647	13.3867	38.0533	30.1333	36.3967	83.4	59.9	180.467	100.203	170.072
K00633	lacA; galactoside O-acetyltransferase [EC:2.3.1.18]	0.916667	0.193333	0	0.176667	0	0.166667	0.25	0	0	0.045
K00634	ptb; phosphate butyryltransferase [EC:2.3.1.19]	14.4167	2.66667	7.66667	6	0	8.33333	9.83333	24	13.6667	22.6667
K00635	E2.3.1.20; diacylglycerol O-acyltransferase [EC:2.3.1.20]	15.3333	0	5	0	12.3333	5.33333	0	0	0	22
K00638	catB; chloramphenicol O-acetyltransferase type B [EC:2.3.1.28]	1.36667	1.72	0	1.35333	0.2	10.5333	3.03333	4.4	2.26667	1.49
K00639	kbl, GCAT; glycine C-acetyltransferase [EC:2.3.1.29]	94.6967	8.86	12.83	12.0667	12.31	37.81	22.1167	75.7333	75.27	84.835
K00640	cysE; serine O-acetyltransferase [EC:2.3.1.30]	288.973	17.86	41.22	30.1233	28.2	75.2	69.6167	216.233	137.603	171.865
K00641	metX; homoserine O-acetyltransferase/O-succinyltransferase [EC:2.3.1.31 2.3.1.46]	168.72	7	15.4433	7.5	18	28.11	30	71.6667	50.39	75.8067
K00643	E2.3.1.37, ALAS; 5-aminolevulinate synthase [EC:2.3.1.37]	26.97	4	4	1.66667	8	6	3.83333	0	4.22333	14.7917
K00645	fabD; [acyl-carrier-protein] S-malonyltransferase [EC:2.3.1.39]	260.39	12.86	27.72	24.0667	35.0867	69.3667	47.1167	140.9	103.993	158.593
K00647	fabB; 3-oxoacyl-[acyl-carrier-protein] synthase I [EC:2.3.1.41]	147.98	8.38667	11.8867	6.24333	11.4	38.7867	35.2333	57.4667	44.3167	49.6717
K00648	fabH; 3-oxoacyl-[acyl-carrier-protein] synthase III [EC:2.3.1.180]	282.447	21.72	34.8833	33.0267	43.7233	100.677	62.5667	213.633	151.153	239.663
K00651	metA; homoserine O-succinyltransferase/O-acetyltransferase [EC:2.3.1.46 2.3.1.31]	14.6433	5.19333	2	5.84333	3.53333	18.8667	6.11667	11.9	13.3233	23.4533
K00652	bioF; 8-amino-7-oxononanoate synthase [EC:2.3.1.47]	199.75	7.19333	19.3867	13.0667	13.9767	39.0333	49.1167	134.067	72.27	93.1817
K00654	SPT; serine palmitoyltransferase [EC:2.3.1.50]	0.443333	0	0	0	0	0	0	0	0	0
K00655	plsC; 1-acyl-sn-glycerol-3-phosphate acyltransferase [EC:2.3.1.51]	425.303	24.86	51.83	41.9033	56.3067	110.643	73.7833	270.9	180.773	275.33
K00656	E2.3.1.54, pflD; formate C-acetyltransferase [EC:2.3.1.54]	37.45	6.05333	5	5.68667	3.2	25.8667	3.03333	19.2333	12.9333	31.9567
K00657	speG, SAT; diamine N-acetyltransferase [EC:2.3.1.57]	33.56	7.19333	7.11	12.51	8.31	18.1433	12.7833	40.4	29.9333	52.8983
K00658	DLST, sucB; 2-oxoglutarate dehydrogenase E2 component (dihydrolipoamide succinyltransferase) [EC:2.3.1.61]	190.917	13.5267	24.4967	17.2333	33.31	61.81	36.45	103.733	95.8267	139.96
K00661	maa; maltose O-acetyltransferase [EC:2.3.1.79]	28.67	5.05333	3.55333	7.74333	6.86667	26.7	7.7	11.0667	17.5467	29.485
K00662	aacC; aminoglycoside 3-N-acetyltransferase [EC:2.3.1.81]	8.44333	0	0.666667	1.66667	0.11	0	0.666667	26	5	9.16667
K00663	aacA; aminoglycoside 6'-N-acetyltransferase [EC:2.3.1.82]	19.6667	0	1.66667	2.33333	5	2.66667	2.33333	1	0	20.8333
K00666	K00666; fatty-acyl-CoA synthase [EC:6.2.1.-]	553.193	22.6667	46	37.34	77.3267	103.333	88.8333	254	150.5	312.237
K00670	NAA30, MAK3; N-alpha-acetyltransferase 30 [EC:2.3.1.256]	0	0	0	0	0	0	0	0	0	0
K00672	ftr; formylmethanofuran--tetrahydromethanopterin N-formyltransferase [EC:2.3.1.101]	13.61	0.333333	0.776667	0	1	4.22333	1.66667	0	8.55667	8.13833
K00673	astA; arginine N-succinyltransferase [EC:2.3.1.109]	182.45	4.19333	19.3333	10.0667	6.86667	31.3667	53.2833	104.4	68.6	60.445
K00674	dapD; 2,3,4,5-tetrahydropyridine-2,6-dicarboxylate N-succinyltransferase [EC:2.3.1.117]	147.03	9.19333	17.61	10.0667	19.31	35.6433	31.6167	74.0667	57.88	87.5983
K00675	nhoA; N-hydroxyarylamine O-acetyltransferase [EC:2.3.1.118]	49.0267	0.526667	3.77667	0.843333	1.22	4.39	10.9167	28	18.2233	16.3783
K00677	lpxA; UDP-N-acetylglucosamine acyltransferase [EC:2.3.1.129]	157.64	9.19333	14.72	11.8433	14.5333	39.5333	38.45	75.4	79.9933	76.3933
K00680	ytmI; uncharacterized N-acetyltransferase [EC:2.3.1.-]	64.9067	10.6667	16.3267	11.6667	12	32.6067	23.1667	48.6667	29.7233	62.35
K00681	ggt; gamma-glutamyltranspeptidase / glutathione hydrolase [EC:2.3.2.2 3.4.19.13]	356.42	21.5267	44.9967	28.5133	52.2867	87.9567	60.8167	162.133	128.093	229.873
K00683	QPCT; glutaminyl-peptide cyclotransferase [EC:2.3.2.5]	13.11	1.66667	5.11	3	1	4.11	9.33333	24	8.66667	11.945
K00684	aat; leucyl/phenylalanyl-tRNA---protein transferase [EC:2.3.2.6]	160.14	9.19333	17.0533	9.06667	18.8667	37.8667	32.95	85.0667	54.7133	79.3983
K00685	ATE1; arginyl-tRNA---protein transferase [EC:2.3.2.8]	107.553	6.19333	13.1667	9.06667	10	26.1667	26.75	44	36.4467	44.975
K00686	tgl; protein-glutamine gamma-glutamyltransferase [EC:2.3.2.13]	1	0	0.666667	0	0	0	0	0	0	5.83333
K00687	pbp2B, penA; penicillin-binding protein 2B	0	0	0	0	0	0	0	1	0	0
K00688	PYG, glgP; glycogen phosphorylase [EC:2.4.1.1]	205.62	7.86	15.4433	13.9	22.8433	52.9567	29.3167	141.467	78.6467	120.728
K00689	E2.4.1.5; dextransucrase [EC:2.4.1.5]	0	0	0	0	0	0	0	0	0	0
K00690	E2.4.1.7; sucrose phosphorylase [EC:2.4.1.7]	29	0	0	0	1	0.166667	1	1	5	3.33333
K00691	mapA; maltose phosphorylase [EC:2.4.1.8]	2.77667	0.333333	1.44333	0	1	1.44333	0	0	4.55667	8.77833
K00692	sacB; levansucrase [EC:2.4.1.10]	8.44333	0	1.66667	0.666667	0.333333	0.666667	4	11.6667	6	4.83333
K00693	GYS; glycogen synthase [EC:2.4.1.11]	0	0	0.666667	0	0	0	0	1.33333	0	0
K00694	bcsA; cellulose synthase (UDP-forming) [EC:2.4.1.12]	46.6433	9	6.33333	5.33333	6.31	31.0333	8.53333	30.7333	12.49	30.2333
K00695	E2.4.1.13; sucrose synthase [EC:2.4.1.13]	0	0	0	0	0	0	0	0	0	0
K00696	E2.4.1.14; sucrose-phosphate synthase [EC:2.4.1.14]	4.16667	1.33333	0.333333	1	1.66667	14.3333	1.66667	0	0	2.08333
K00697	otsA; trehalose 6-phosphate synthase [EC:2.4.1.15 2.4.1.347]	110.06	5.33333	13.8333	10.1667	16.9767	22.2	17.2	75.4	41.6	84.7183
K00700	GBE1, glgB; 1,4-alpha-glucan branching enzyme [EC:2.4.1.18]	151.473	10.1933	12.9967	9.56667	21.7533	45.4233	28.45	68.0667	57.6033	112.107
K00701	cgt; cyclomaltodextrin glucanotransferase [EC:2.4.1.19]	0	0	0.5	0	0	0.333333	0	0	0	0.583333
K00702	E2.4.1.20; cellobiose phosphorylase [EC:2.4.1.20]	0.333333	0	0	0	0	0	0	5.33333	0	3.46667
K00703	glgA; starch synthase [EC:2.4.1.21]	164.14	11.5267	21.33	17.29	20.5333	42.81	26.7833	78.9	74.2133	104.302
K00705	malQ; 4-alpha-glucanotransferase [EC:2.4.1.25]	135.477	3.52667	6.77667	6.23333	9.64333	25.4233	26.1167	87.5667	47.1567	64.9117
K00712	tagE; poly(glycerol-phosphate) alpha-glucosyltransferase [EC:2.4.1.52]	2.66667	0	0	0	0	0	0	0	0	0
K00720	UGCG; ceramide glucosyltransferase [EC:2.4.1.80]	18.7767	0	0.666667	0.223333	0.333333	0	0.5	0	11	9.945
K00721	DPM1; dolichol-phosphate mannosyltransferase [EC:2.4.1.83]	177.02	4.33333	22.3833	15.6133	30.8867	53.17	32.5	206.5	90.23	129.912
K00729	ALG5; dolichyl-phosphate beta-glucosyltransferase [EC:2.4.1.117]	0	0	0	0	0.11	0	0	0	0	2.16667
K00737	MGAT3; beta-1,4-mannosyl-glycoprotein beta-1,4-N-acetylglucosaminyltransferase [EC:2.4.1.144]	1	0	0	0	0	0	0	0	0	0
K00748	lpxB; lipid-A-disaccharide synthase [EC:2.4.1.182]	178.39	10.1933	16.0533	11.8433	15.2	40.2	42.1167	95.0667	80.8267	82.1483
K00752	hasA; hyaluronan synthase [EC:2.4.1.212]	4.66667	0	0	0.223333	0	0	0	0	0	4
K00754	bshA; L-malate glycosyltransferase [EC:2.4.1.-]	16.5433	2	3.32667	0	7	3.66	1	3.33333	9.11333	20.8933
K00756	pdp; pyrimidine-nucleoside phosphorylase [EC:2.4.2.2]	34.9433	2.66667	6.44333	7.33333	6.33333	13.89	2.66667	27.8333	17.5567	40.75
K00757	udp, UPP; uridine phosphorylase [EC:2.4.2.3]	6.72667	4.05333	2.77667	2.35333	2.53333	23.1433	3.7	11.7333	21.88	12.735
K00758	deoA, TYMP; thymidine phosphorylase [EC:2.4.2.4]	55.7833	7.52667	10.6667	7.51	13.31	25.5333	17.6167	48.4	21.9333	54.2233
K00759	APRT, apt; adenine phosphoribosyltransferase [EC:2.4.2.7]	217.75	10.1933	21.0533	22.2333	28.6433	59.0333	32.2833	122.233	85.4933	136.69
K00760	hprT, hpt, HPRT1; hypoxanthine phosphoribosyltransferase [EC:2.4.2.8]	212.837	11.5267	28.61	26.2333	28.6433	74.4233	38.45	145.9	100.493	148.453
K00761	upp, UPRT; uracil phosphoribosyltransferase [EC:2.4.2.9]	185.39	12.1933	20.0533	17.01	26.31	51.7	41.1167	112.567	89.66	120.982
K00762	pyrE; orotate phosphoribosyltransferase [EC:2.4.2.10]	234.89	12.86	28.3867	24.5667	33.9767	67.8667	41.6167	137.9	96.3267	158.398
K00763	pncB, NAPRT1; nicotinate phosphoribosyltransferase [EC:6.3.4.21]	182.447	11.1933	24.61	21.5667	25.31	54.6433	37.7833	146.233	68.5467	131.877
K00764	purF, PPAT; amidophosphoribosyltransferase [EC:2.4.2.14]	227.723	12.86	27.72	23.9	32.6433	67.0333	42.1167	136.9	98.4933	154.948
K00765	hisG; ATP phosphoribosyltransferase [EC:2.4.2.17]	235.807	12.86	27.3867	24.5667	31.6433	66.0333	42.1167	151.233	103.437	150.148
K00766	trpD; anthranilate phosphoribosyltransferase [EC:2.4.2.18]	232.973	12.86	27.3867	22.9	32.6433	63.8667	40.95	149.9	103.103	146.482
K00767	nadC, QPRT; nicotinate-nucleotide pyrophosphorylase (carboxylating) [EC:2.4.2.19]	219.113	10.86	27.72	22.5667	30.31	62.7	40.6167	133.9	95.2133	142.648
K00768	E2.4.2.21, cobU, cobT; nicotinate-nucleotide--dimethylbenzimidazole phosphoribosyltransferase [EC:2.4.2.21]	119.72	7.52667	14.6667	14.01	21.8867	39.1667	25.4167	99.1667	51.06	89.8867
K00769	gpt; xanthine phosphoribosyltransferase [EC:2.4.2.22]	16.42	4.86	3	2.84333	6.2	14.0333	6.11667	4.73333	5.15667	13.57
K00772	mtaP, MTAP; 5'-methylthioadenosine phosphorylase [EC:2.4.2.28]	106.777	3.66667	15	9.89	19.4433	21.6667	6.83333	83.8333	26.7233	72.1667
K00773	tgt, QTRT1; queuine tRNA-ribosyltransferase [EC:2.4.2.29]	232.943	12.86	27.3867	22.9	27.5333	64.3667	42.95	156.233	105.273	139.982
K00782	lldG; L-lactate dehydrogenase complex protein LldG	108.527	9.33333	15.7767	14.5	17.11	38.89	19.3333	63.1667	52.6133	84.495
K00783	rlmH; 23S rRNA (pseudouridine1915-N3)-methyltransferase [EC:2.1.1.177]	157.28	10.1933	18.61	15.0667	22.2	45.31	34.6167	69.5667	73.38	97.065
K00784	rnz; ribonuclease Z [EC:3.1.26.11]	127.303	8	16.22	16.3333	14.4433	29.6667	16.8333	86	49.9467	86.4667
K00786	E2.4.-.-; glycosyltransferase [EC:2.4.-.-]	29.83	2.33333	5.99667	3	5.33333	7.16333	9.33333	24	11	23.2517
K00788	thiE; thiamine-phosphate pyrophosphorylase [EC:2.5.1.3]	282.223	15.3867	31.61	28.3	33.6433	80.09	46.3667	149.567	109.16	186.89
K00789	metK; S-adenosylmethionine synthetase [EC:2.5.1.6]	237.223	12.86	28.3867	24.5667	32.6433	67.0333	41.6167	156.9	105.66	156.815
K00790	murA; UDP-N-acetylglucosamine 1-carboxyvinyltransferase [EC:2.5.1.7]	252.28	16.1933	27.61	30.5667	35.7533	72.81	41.95	163.733	111.437	184.732
K00791	miaA, TRIT1; tRNA dimethylallyltransferase [EC:2.5.1.75]	238.64	12.86	28.3867	24.5667	33.31	67.0333	41.6167	152.567	110.493	156.782
K00793	ribE, RIB5; riboflavin synthase [EC:2.5.1.9]	225.473	14.3867	27.72	25.0767	32.6433	77.0333	41.8667	130.233	95.16	146.193
K00794	ribH, RIB4; 6,7-dimethyl-8-ribityllumazine synthase [EC:2.5.1.78]	241.083	12.86	29.72	24.5667	32.6433	70.7	50.2833	142.9	107.717	157.857
K00795	ispA; farnesyl diphosphate synthase [EC:2.5.1.1 2.5.1.10]	74.0867	6.86	11.1667	6.51	9.86667	24.2	19.6167	34.7333	29.49	41.4867
K00796	folP; dihydropteroate synthase [EC:2.5.1.15]	268.557	12.86	30.3867	26.7333	41.42	74.3667	43.2833	186.567	111.993	170.898
K00797	speE, SRM; spermidine synthase [EC:2.5.1.16]	175.253	7.66667	20.2767	16.4467	14.9767	29.09	43.8667	97.5667	62.38	97.0117
K00798	MMAB, pduO; cob(I)alamin adenosyltransferase [EC:2.5.1.17]	196.44	9	24.72	17.89	28.7767	45	34.1667	126.333	91.7267	122.653
K00799	GST, gst; glutathione S-transferase [EC:2.5.1.18]	937.6	47.5267	110.5	59.41	79.6667	162	245.083	499	281.56	424.587
K00800	aroA; 3-phosphoshikimate 1-carboxyvinyltransferase [EC:2.5.1.19]	241.39	12.86	28.3867	24.5667	31.7533	67.0333	42.7833	157.567	105.66	154.982
K00801	FDFT1; farnesyl-diphosphate farnesyltransferase [EC:2.5.1.21]	34.3333	2.66667	0	1.66667	2.33333	5	2.66667	19.6667	11.6667	17.2217
K00803	AGPS, agpS; alkyldihydroxyacetonephosphate synthase [EC:2.5.1.26]	62.1667	1.33333	6.33333	6.11333	4.44333	6.33333	10.3333	52.3333	11.3333	29.6667
K00805	hepST; heptaprenyl diphosphate synthase [EC:2.5.1.30]	71.3333	6	11.3333	15.8333	18.11	30.8333	1.66667	58.5	33.8333	86
K00806	uppS; undecaprenyl diphosphate synthase [EC:2.5.1.31]	238.723	12.86	28.3867	24.5667	31.6433	67.0333	41.6167	157.4	106.66	154.815
K00808	hss; homospermidine synthase [EC:2.5.1.44]	8.19333	2.66667	4.66667	1.66667	4.66667	2.66667	2.33333	0	0.556667	10.7917
K00809	DHPS, dys; deoxyhypusine synthase [EC:2.5.1.46]	49.0533	2.33333	6.22	1.78	7.33333	12.3333	5.83333	27.6667	21.1133	30.195
K00812	aspB; aspartate aminotransferase [EC:2.6.1.1]	132.047	10.6667	18.2167	14.89	29	44.7233	20.3333	47.5	71.1167	109.073
K00813	aspC; aspartate aminotransferase [EC:2.6.1.1]	3.11667	1.52667	0	1.17667	0.866667	12.3667	4.45	4.73333	2.26667	4.945
K00816	CCBL; kynurenine---oxoglutarate transaminase / cysteine-S-conjugate beta-lyase / glutamine---phenylpyruvate transaminase [EC:2.6.1.7 4.4.1.13 2.6.1.64]	0	0	0	0	0	0	0	0	0	2.16667
K00817	hisC; histidinol-phosphate aminotransferase [EC:2.6.1.9]	375.637	18.1933	45.5533	36.0667	42.9733	91.5333	84.6167	255.233	166.107	231.065
K00818	E2.6.1.11, argD; acetylornithine aminotransferase [EC:2.6.1.11]	110.887	6.66667	12.5533	11.1667	20.11	32.0533	15.3333	79.1667	57.2233	97.2733
K00819	rocD, OAT; ornithine--oxo-acid transaminase [EC:2.6.1.13]	39.3033	2.66667	7.11	7.66667	8.99667	11.4433	3	28	27.6133	41.6533
K00820	glmS, GFPT; glucosamine---fructose-6-phosphate aminotransferase (isomerizing) [EC:2.6.1.16]	324.61	16.1933	42.5533	33.5667	44.1967	77.7	59.7833	238.9	145.717	213.365
K00821	argD; acetylornithine/N-succinyldiaminopimelate aminotransferase [EC:2.6.1.11 2.6.1.17]	164.087	6.19333	20.1667	15.7333	15.5333	41.3667	31.6167	82.2333	48.99	76.6533
K00822	E2.6.1.18; beta-alanine--pyruvate transaminase [EC:2.6.1.18]	85.97	5.33333	11.8333	5.33333	6.33333	15.8333	25	42.6667	32.89	48.7083
K00823	puuE; 4-aminobutyrate aminotransferase [EC:2.6.1.19]	60.2267	0.526667	5.44333	4.73333	3.64333	7.92333	9.45	68.4	34.6567	35.1117
K00824	dat; D-alanine transaminase [EC:2.6.1.21]	43.4433	5.66667	6.33333	7	10.3333	15.8333	4.83333	1	21.3367	42.2783
K00826	E2.6.1.42, ilvE; branched-chain amino acid aminotransferase [EC:2.6.1.42]	327.36	18.1933	45.94	32.1233	52.7533	98.8667	52.2833	220.9	153.773	232.552
K00830	AGXT; alanine-glyoxylate transaminase / serine-glyoxylate transaminase / serine-pyruvate transaminase [EC:2.6.1.44 2.6.1.45 2.6.1.51]	24.1933	4.52667	2.11	2.84333	5	19.0567	4.25	4.66667	5.55667	16.8783
K00831	serC, PSAT1; phosphoserine aminotransferase [EC:2.6.1.52]	167.613	11.5267	21.61	17.2333	24.9767	45.6433	39.45	95.4	75.9933	118.065
K00832	tyrB; aromatic-amino-acid transaminase [EC:2.6.1.57]	103.45	5.52667	13.1667	7.4	7.86667	27.3667	36.1167	60.0667	51.8233	48.0283
K00833	bioA; adenosylmethionine---8-amino-7-oxononanoate aminotransferase [EC:2.6.1.62]	138.64	4.86	14.0533	10.5667	8.97667	33.5333	32.2833	80.0667	62.8267	68.1267
K00835	avtA; valine--pyruvate aminotransferase [EC:2.6.1.66]	44.45	2.52667	0	1.17667	1.2	11.7	5.45	24.4	5.26667	5.77833
K00836	ectB, dat; diaminobutyrate-2-oxoglutarate transaminase [EC:2.6.1.76]	73.0333	5.05333	3.66667	4.68667	1.42	34.2	20.7	35.7333	19.9333	21.6567
K00839	pucG; (S)-ureidoglycine---glyoxylate transaminase [EC:2.6.1.112]	1.31	0	0	0	0.2	0.533333	2.53333	4.4	2.26667	1.4
K00840	astC; succinylornithine aminotransferase [EC:2.6.1.81]	12.2	1.33333	4.66667	3	0.2	4.03333	11.8667	28.7333	10.9333	12.0667
K00841	patA; aminotransferase [EC:2.6.1.-]	1.33333	1	2	3.33333	0	4.33333	0	1	2.33333	8
K00842	E2.6.1.-E, patB; aminotransferase [EC:2.6.1.-]	0.666667	0	0	0	0	0	0	0	0	0
K00844	HK; hexokinase [EC:2.7.1.1]	0.5	0	0	0	0	0	0	0	0	0.666667
K00845	glk; glucokinase [EC:2.7.1.2]	324.36	15	36.7733	31.7233	44.9733	71.98	63.3667	241.233	140.217	210.853
K00847	E2.7.1.4, scrK; fructokinase [EC:2.7.1.4]	213.45	11.6667	21.3867	15.3367	30.1767	43.2333	44.9	108.8	94.48	125.942
K00848	rhaB; rhamnulokinase [EC:2.7.1.5]	10.9433	0.333333	3.77667	0	6.77667	6.72333	3.33333	16.6667	8.22333	19.495
K00849	galK; galactokinase [EC:2.7.1.6]	72.7267	4.52667	13.11	14.3433	14.9767	34.1433	5.45	66.4	43.49	72.7183
K00850	pfkA, PFK; 6-phosphofructokinase 1 [EC:2.7.1.11]	217.64	10.86	26.2733	22.9	30.8633	67.2	32.45	193.733	114.717	159.692
K00851	E2.7.1.12, gntK, idnK; gluconokinase [EC:2.7.1.12]	85.31	4.19333	12.8333	10.51	12.9767	20.2	23.95	71.0667	48.0467	73.625
K00852	rbsK, RBKS; ribokinase [EC:2.7.1.15]	185.947	11.1933	23.2767	19.6767	24.7533	55.9233	36.1167	157.4	72.9367	128.307
K00853	araB; L-ribulokinase [EC:2.7.1.16]	10.56	0.526667	3.44333	1.84333	3.2	6.47667	5.45	6.73333	10.49	16.39
K00854	xylB, XYLB; xylulokinase [EC:2.7.1.17]	148.197	9.66667	26.2767	18.2233	18.53	41.2567	42.0333	133.067	72.9367	136.783
K00855	PRK, prkB; phosphoribulokinase [EC:2.7.1.19]	85.1167	3.52667	0	1.17667	2.86667	12.7	8.11667	44.0667	20.6	23.0283
K00856	E2.7.1.20, ADK; adenosine kinase [EC:2.7.1.20]	62.8333	1.33333	7.5	5.33333	7.77667	12.1667	14.6667	74	31.7233	42.75
K00857	tdk, TK; thymidine kinase [EC:2.7.1.21]	94.5867	10.1933	17.61	17.4	19.31	39.6433	21.45	76.7333	53.99	84.1067
K00858	ppnK, NADK; NAD+ kinase [EC:2.7.1.23]	267.39	14.5267	30.3867	29.2333	32.7533	71.0333	44.2833	177.233	108.66	172.26
K00859	coaE; dephospho-CoA kinase [EC:2.7.1.24]	236.973	12.86	28.3867	24.5667	32.6433	67.0333	41.6167	151.233	105.66	155.115
K00860	cysC; adenylylsulfate kinase [EC:2.7.1.25]	65.17	4.52667	10.5533	5.73333	2.97667	24.0333	21.1167	72.4	27.2133	41.3617
K00862	eryA; erythritol kinase (D-erythritol 1-phosphate-forming) [EC:2.7.1.215]	1.61	0	0	0	0	0	1	0	0.556667	0.75
K00863	DAK, TKFC; triose/dihydroxyacetone kinase / FAD-AMP lyase (cyclizing) [EC:2.7.1.28 2.7.1.29 4.6.1.15]	9.41333	0	0	0.5	0	1	1	8	2.55667	8.45833
K00864	glpK, GK; glycerol kinase [EC:2.7.1.30]	215.423	13.1933	24.7767	23.5667	31.62	63.79	45.15	168.3	85.4267	140.762
K00865	glxK, garK; glycerate 2-kinase [EC:2.7.1.165]	71.7833	5.19333	7.66667	11.01	13.6433	35.2	9.78333	62.5667	39.6567	68.7733
K00867	coaA; type I pantothenate kinase [EC:2.7.1.33]	23.4767	3.52667	4.66667	2.34333	10.9767	7.7	6.78333	14.7333	7.49	28.9867
K00868	pdxK, pdxY; pyridoxine kinase [EC:2.7.1.35]	66.0933	8.38667	9.66667	9.85333	12.4	33.4	16.9	38.8	37.98	64.2317
K00869	E2.7.1.36, MVK, mvaK1; mevalonate kinase [EC:2.7.1.36]	17.7767	0.333333	1.11	0.89	1	1.11	0.666667	23	17.6667	14.7783
K00870	E2.7.1.37; protein kinase [EC:2.7.1.37]	0	0	0	0	0	0	0	0	0	0
K00872	thrB1; homoserine kinase [EC:2.7.1.39]	126.727	7.19333	14.9433	15.01	20.31	42.6433	16.45	107.233	51.2133	94.8067
K00873	PK, pyk; pyruvate kinase [EC:2.7.1.40]	304.923	16.9133	33.0533	28.5867	32.9533	86.0667	66.9833	212.3	133.703	190.138
K00874	kdgK; 2-dehydro-3-deoxygluconokinase [EC:2.7.1.45]	109.037	12.0533	15.2767	20.1333	19.9533	50.8433	29.0667	82.4667	72.98	100.17
K00875	E2.7.1.47; D-ribulokinase [EC:2.7.1.47]	1.63667	0	0	0	0	0	1	0	0.556667	0.208333
K00876	udk, UCK; uridine kinase [EC:2.7.1.48]	93.3933	8.86	15.4433	15.7333	12.9767	35.81	15.1167	85.9	59.88	89.99
K00878	thiM; hydroxyethylthiazole kinase [EC:2.7.1.50]	36.95	4.52667	5	7.17667	9.53333	13.7	2.78333	22.2333	32.99	43.195
K00879	fucK; L-fuculokinase [EC:2.7.1.51]	0	0	0	0	0	0.166667	0	0	0	0
K00880	lyxK; L-xylulokinase [EC:2.7.1.53]	1.39333	0	0	0	0.2	1.7	2.53333	4.73333	2.26667	4.94167
K00881	alsK; allose kinase [EC:2.7.1.55]	0	0	0	0	0	0.166667	0	0	0	0
K00882	fruK; 1-phosphofructokinase [EC:2.7.1.56]	84.7833	3.86	8	9.67667	9.64333	27.3667	17.1167	64.0667	25.4333	54.8067
K00883	dgoK; 2-dehydro-3-deoxygalactonokinase [EC:2.7.1.58]	47.1933	4.66667	12.5	5.33333	7	13.1667	19.5	37	24.2233	37.0417
K00884	NAGK, nagK; N-acetylglucosamine kinase [EC:2.7.1.59]	35.53	2.86	4.66667	4.17667	0.2	15.0333	15.7833	33.7333	14.2667	15.6533
K00885	nanK; N-acylmannosamine kinase [EC:2.7.1.60]	0	0	0	0	0	0.166667	0	0.333333	0	0
K00886	ppgK; polyphosphate glucokinase [EC:2.7.1.63]	27.61	1.66667	2.11	2.16667	7.11	6.77667	1.66667	19.6667	19.3333	29.195
K00887	dgkA; undecaprenol kinase [EC:2.7.1.66]	8	3	2	5.33333	2.33333	7.66667	0.666667	1	9.33333	16.555
K00889	PIP5K; 1-phosphatidylinositol-4-phosphate 5-kinase [EC:2.7.1.68]	3	0	0	0	0	0	0	0	0	0
K00891	E2.7.1.71, aroK, aroL; shikimate kinase [EC:2.7.1.71]	219.23	11.5267	18.3867	17.01	32.51	60.2333	34.8167	106.3	92.15	134.298
K00892	gsk; inosine kinase [EC:2.7.1.73]	1.36667	3.05333	0	2.35333	0.866667	21.0333	3.03333	4.73333	2.26667	1.49
K00895	pfp, PFP; diphosphate-dependent phosphofructokinase [EC:2.7.1.90]	3.75	0	0	0	0	1	0	2.66667	6.83333	3.96667
K00897	aphA; kanamycin kinase [EC:2.7.1.95]	0	0	0	0	1	0	0	0	0	0.833333
K00899	mtnK; 5-methylthioribose kinase [EC:2.7.1.100]	5.31	0.666667	2	3.66667	0.2	3.2	3.86667	4.73333	6.93333	13.0667
K00901	dgkA, DGK; diacylglycerol kinase (ATP) [EC:2.7.1.107]	128.447	6.72	12.0533	5.68667	7.86667	29.8667	40.0333	101.567	70.1033	53.31
K00906	aceK; isocitrate dehydrogenase kinase/phosphatase [EC:2.7.11.5 3.1.3.-]	61.2	2.66667	7.16667	4.66667	1.86667	18.3667	25.2	47.4	33.6	26.9833
K00912	lpxK; tetraacyldisaccharide 4'-kinase [EC:2.7.1.130]	134.723	8.19333	16.0533	10.1767	14.2	37.2	32.1167	55.7333	74.8267	71.4817
K00917	lacC; tagatose 6-phosphate kinase [EC:2.7.1.144]	27.3333	0	1.33333	1.66667	3.44333	7	0.666667	17.6667	0	13.445
K00919	ispE; 4-diphosphocytidyl-2-C-methyl-D-erythritol kinase [EC:2.7.1.148]	220.613	11.86	27.2767	23.6767	31.6433	65.9233	42.1167	129.233	91.9933	144.203
K00924	E2.7.1.-; kinase [EC:2.7.1.-]	23.0733	5	9.99	1.66667	16.11	40.2833	18	6.66667	21.12	36.485
K00925	ackA; acetate kinase [EC:2.7.2.1]	133.503	11.0533	16.4433	18.1867	19.9767	50.7567	31.3667	86.5667	52.2133	103.373
K00926	arcC; carbamate kinase [EC:2.7.2.2]	44.8333	1.33333	4.33333	2.33333	5.66667	14.1667	9.66667	31.3333	23	27.5
K00927	PGK, pgk; phosphoglycerate kinase [EC:2.7.2.3]	238.39	12.86	28.3867	24.5667	33.31	69.7	41.6167	163.567	106.66	155.982
K00928	lysC; aspartate kinase [EC:2.7.2.4]	265.833	20.2467	33.6633	35.81	39.31	101.143	41.45	153.4	120.55	189.767
K00929	buk; butyrate kinase [EC:2.7.2.7]	3.91667	0.666667	3	3	0	4	0	0	6	12.3333
K00930	argB; acetylglutamate kinase [EC:2.7.2.8]	230.307	12.86	27.3867	24.1233	31.31	65.2	41.45	135.9	99.4367	150.065
K00931	proB; glutamate 5-kinase [EC:2.7.2.11]	219.307	12.86	25.3867	23.2333	28.9767	61.5333	39.95	145.9	93.27	131.398
K00932	tdcD; propionate kinase [EC:2.7.2.15]	0	0	0	0	0	0.166667	0	0.333333	0	0
K00936	pdtaS; two-component system, sensor histidine kinase PdtaS [EC:2.7.13.3]	187.23	13	30.5433	13.1133	36.6667	76.1567	67.1667	210.833	140.457	149.767
K00937	ppk; polyphosphate kinase [EC:2.7.4.1]	188.417	13.1933	18.4967	15.0667	23.6433	50.31	39.6167	98.4	68.3833	116.96
K00938	E2.7.4.2, mvaK2; phosphomevalonate kinase [EC:2.7.4.2]	1.33333	0	0	0.223333	0	0	0	1	0	0.333333
K00939	adk, AK; adenylate kinase [EC:2.7.4.3]	252.777	13.1933	29.1633	24.5667	33.6433	72.2567	45.2833	163.233	110.94	161.62
K00940	ndk, NME; nucleoside-diphosphate kinase [EC:2.7.4.6]	235.14	12.86	27.3867	22.9	32.6433	65.0333	41.6167	152.233	104.827	148.515
K00941	thiD; hydroxymethylpyrimidine/phosphomethylpyrimidine kinase [EC:2.7.1.49 2.7.4.7]	232.087	12.1933	26.8333	25.2333	23.31	63.7	49.2833	147.9	96.0467	151.753
K00942	E2.7.4.8, gmk; guanylate kinase [EC:2.7.4.8]	236.89	12.86	28.3867	24.5667	32.6433	67.0333	41.6167	151.233	105.66	153.315
K00943	tmk, DTYMK; dTMP kinase [EC:2.7.4.9]	258.03	11.86	27.2767	27.9	30.31	64.9233	45.1167	165.9	91.77	155.07
K00945	cmk; CMP/dCMP kinase [EC:2.7.4.25]	212.723	11.86	28.3867	24.5667	31.6433	65.0333	38.95	130.567	101.327	148.315
K00946	thiL; thiamine-monophosphate kinase [EC:2.7.4.16]	206.03	9.86	24.72	18.5667	29.6433	58.0333	38.2833	130.233	88.6033	122.44
K00947	mosAB; molybdenum storage protein	0	0	0	0	0	0	0	0	0	0.333333
K00948	PRPS, prsA; ribose-phosphate pyrophosphokinase [EC:2.7.6.1]	245.89	12.86	29.72	24.79	36.42	68.5333	42.1167	164.9	110.383	164.065
K00949	thiN, TPK1, THI80; thiamine pyrophosphokinase [EC:2.7.6.2]	34.11	3.66667	6.33333	7.66667	4.66667	11.6667	3.33333	29.5	22.39	34.675
K00950	folK; 2-amino-4-hydroxy-6-hydroxymethyldihydropteridine diphosphokinase [EC:2.7.6.3]	292.337	14.0533	29.4433	24.7433	33.31	77.2567	54.0333	166.567	116.993	150.243
K00951	relA; GTP pyrophosphokinase [EC:2.7.6.5]	281.503	14.5267	31.9433	29.2333	30.42	63.9767	47.6167	196.233	123.047	179.823
K00952	nadM; nicotinamide-nucleotide adenylyltransferase [EC:2.7.7.1]	0	0	0	0	0	0	0	1	0	0.5
K00954	E2.7.7.3A, coaD, kdtB; pantetheine-phosphate adenylyltransferase [EC:2.7.7.3]	248.057	14.1933	33.0533	27.5667	32.6433	70.7	50.95	180.567	114.327	165.982
K00955	cysNC; bifunctional enzyme CysN/CysC [EC:2.7.7.4 2.7.1.25]	103.247	2.33333	6.27667	4.55667	13.3333	16.2233	16.5	63.6667	19.67	48.9583
K00956	cysN; sulfate adenylyltransferase subunit 1 [EC:2.7.7.4]	69.2267	8.52667	10.4433	9.01	13.42	34.6433	14.45	48.7333	41.99	49.9733
K00957	cysD; sulfate adenylyltransferase subunit 2 [EC:2.7.7.4]	130.973	8.86	16.72	10.5667	20.6433	38.2	31.1167	89.4	56.4367	86.5983
K00958	sat, met3; sulfate adenylyltransferase [EC:2.7.7.4]	48.8333	1.66667	2.66667	2.33333	6.66667	6	3.66667	30.6667	11.1667	27.1117
K00960	E2.7.7.6; DNA-directed RNA polymerase [EC:2.7.7.6]	0	0	0.666667	0	0	0	0	0	0	2.33333
K00962	pnp, PNPT1; polyribonucleotide nucleotidyltransferase [EC:2.7.7.8]	252.39	12.86	28.3867	24.5667	32.6433	67.0333	45.2833	156.233	108.993	155.482
K00963	UGP2, galU, galF; UTP--glucose-1-phosphate uridylyltransferase [EC:2.7.7.9]	183.313	11.3867	27.2767	21.0767	24.62	63.79	39.4	108.967	75.5367	124.848
K00965	galT, GALT; UDPglucose--hexose-1-phosphate uridylyltransferase [EC:2.7.7.12]	67.17	5.19333	7.88667	8.17667	12.31	32.0333	11.7833	48.4	24.2133	61.4733
K00966	GMPP; mannose-1-phosphate guanylyltransferase [EC:2.7.7.13]	66.1667	3.66667	10.6667	7.72333	5.77667	25.6667	15.6667	89	29.8333	41.25
K00968	PCYT1; choline-phosphate cytidylyltransferase [EC:2.7.7.15]	0.25	0	0	0	0	0	0	0	0	0
K00969	nadD; nicotinate-nucleotide adenylyltransferase [EC:2.7.7.18]	235.613	12.86	28.3867	24.5667	32.6433	67.0333	41.6167	151.233	105.66	154.315
K00970	pcnB; poly(A) polymerase [EC:2.7.7.19]	192.03	6.52667	20.61	18.1233	23.31	54.9233	33.6167	117.4	79.88	116.57
K00971	manC, cpsB; mannose-1-phosphate guanylyltransferase [EC:2.7.7.13]	144.717	7.52667	11.6633	9.73333	24.6667	30.9433	26.25	73	57.8933	90.7933
K00972	UAP1; UDP-N-acetylglucosamine/UDP-N-acetylgalactosamine diphosphorylase [EC:2.7.7.23 2.7.7.83]	5.27667	0.333333	0.776667	0	1	6.22333	1.66667	2	4.22333	6.75
K00973	E2.7.7.24, rfbA, rffH; glucose-1-phosphate thymidylyltransferase [EC:2.7.7.24]	248.89	10.1933	28.1633	21.6767	32.9767	62.31	40.1167	175.567	123.437	150.01
K00974	cca; tRNA nucleotidyltransferase (CCA-adding enzyme) [EC:2.7.7.72 3.1.3.- 3.1.4.-]	198.893	8.19333	21.2767	20.0667	12.8667	44.6433	37.7833	134.233	64.6	103.473
K00975	glgC; glucose-1-phosphate adenylyltransferase [EC:2.7.7.27]	124.42	10.0533	15.5533	16.7433	19.6433	45.6467	15.7	81.4	53.7133	113.323
K00978	rfbF; glucose-1-phosphate cytidylyltransferase [EC:2.7.7.33]	41.6367	1.66667	7.44333	5.55667	1.44333	5.22333	17.5	77	25.28	25.875
K00979	kdsB; 3-deoxy-manno-octulosonate cytidylyltransferase (CMP-KDO synthetase) [EC:2.7.7.38]	138.057	8.19333	16.0533	11.8433	14.5333	38.2	32.1167	55.7333	74.8267	75.9817
K00980	tagD; glycerol-3-phosphate cytidylyltransferase [EC:2.7.7.39]	6.58333	0	2.33333	0.666667	8.33333	2.83333	0	0	0	9.16667
K00981	E2.7.7.41, CDS1, CDS2, cdsA; phosphatidate cytidylyltransferase [EC:2.7.7.41]	266.307	14.1933	30.72	26.2333	34.6433	85.8667	53.6167	168.9	116.66	168.94
K00982	glnE; [glutamine synthetase] adenylyltransferase / [glutamine synthetase]-adenylyl-L-tyrosine phosphorylase [EC:2.7.7.42 2.7.7.89]	133.087	8.52667	16.2767	9.56667	18.6433	36.09	33.6167	63.0667	44.38	78.6533
K00983	neuA; N-acylneuraminate cytidylyltransferase [EC:2.7.7.43]	27.22	0.666667	3.88667	1.33333	2.66667	2.55333	4	28.3333	25.6133	16.5567
K00984	aadA; streptomycin 3"-adenylyltransferase [EC:2.7.7.47]	3	0	0.333333	0	0	3	1.33333	1	0.333333	4.66667
K00986	ltrA; RNA-directed DNA polymerase [EC:2.7.7.49]	16	1.33333	6.66667	3	0	5.33333	15.6667	30.6667	10.1667	13.5
K00988	APA1_2; ATP adenylyltransferase [EC:2.7.7.53]	8.33333	1.33333	0	1	0	10.3333	0	0	6.33333	4.5
K00989	rph; ribonuclease PH [EC:2.7.7.56]	210.53	11.86	25.61	19.9	29.6433	61.9233	40.95	133.567	78.5467	132.403
K00990	glnD; [protein-PII] uridylyltransferase [EC:2.7.7.59]	132.42	6.86	15.1667	8.4	19.31	34.8667	32.6167	61.0667	42.49	70.57
K00991	ispD; 2-C-methyl-D-erythritol 4-phosphate cytidylyltransferase [EC:2.7.7.60]	187.477	8.72	18.2767	21.1867	28.0867	55.9233	37.0333	134.9	83.5467	134.59
K00992	murU; N-acetyl-alpha-D-muramate 1-phosphate uridylyltransferase [EC:2.7.7.99]	110.86	4.66667	12.5	5.33333	10	15.1667	26.5	48	34.2233	43.875
K00993	EPT1; ethanolaminephosphotransferase [EC:2.7.8.1]	0	0	0	0	0	0	0	0	0	0
K00995	pgsA, PGS1; CDP-diacylglycerol---glycerol-3-phosphate 3-phosphatidyltransferase [EC:2.7.8.5]	291.977	11.1933	29.61	29.5133	41.0867	77.7567	40.45	190.9	94.38	184.453
K00996	rfbP; undecaprenyl-phosphate galactose phosphotransferase [EC:2.7.8.6]	0	0	0	0	0	0	0	0.333333	1.22333	0.5
K00997	acpS; holo-[acyl-carrier protein] synthase [EC:2.7.8.7]	166.03	12.5267	22.11	23.01	29.31	58.9233	24.95	107.9	75.3267	131.32
K00998	pssA; CDP-diacylglycerol---serine O-phosphatidyltransferase [EC:2.7.8.8]	12.1167	1.52667	2	1.84333	0.866667	13.0333	8.11667	17.4	8.6	6.945
K00999	CDIPT; CDP-diacylglycerol--inositol 3-phosphatidyltransferase [EC:2.7.8.11]	5	0	1.66667	0	5	2.66667	0	0	0	7.5
K01000	mraY; phospho-N-acetylmuramoyl-pentapeptide-transferase [EC:2.7.8.13]	234.447	12.5267	27.61	24.5667	31.6433	63.4767	39.95	156.567	103.437	152.732
K01001	ALG7; UDP-N-acetylglucosamine--dolichyl-phosphate N-acetylglucosaminephosphotransferase [EC:2.7.8.15]	0	0	0	0	0	0	0	0	0	0.5
K01002	mdoB; phosphoglycerol transferase [EC:2.7.8.20]	16.6667	0	0	0	0	0.166667	3.66667	5.33333	3.33333	0.666667
K01003	bcpA; oxaloacetate decarboxylase [EC:4.1.1.3]	22.6667	0	2	0.666667	0	2.33333	9.66667	12.6667	8	6.33333
K01004	pcs; phosphatidylcholine synthase [EC:2.7.8.24]	22.1933	0.666667	1.66667	0	1.33333	4.66667	10	1	3.89	4.90333
K01006	ppdK; pyruvate, orthophosphate dikinase [EC:2.7.9.1]	120.22	3.66667	14.7767	15.2233	18.8867	31.39	11.8333	87.1667	41.4467	96.0917
K01007	pps, ppsA; pyruvate, water dikinase [EC:2.7.9.2]	175.617	6.86	16.5	10.9567	10.6433	35.3667	32.45	103.067	56.38	83.5
K01008	selD, SEPHS; selenide, water dikinase [EC:2.7.9.3]	163.727	6.66667	21.7767	13.89	14.2	37.9233	27.2	87.5667	63.0467	85.3583
K01011	TST, MPST, sseA; thiosulfate/3-mercaptopyruvate sulfurtransferase [EC:2.8.1.1 2.8.1.2]	275.723	17.0533	31.0533	26.2433	39.7533	82.98	53.5333	151.067	90.3267	172.865
K01012	bioB; biotin synthase [EC:2.8.1.6]	184.14	8.86	17.72	17.5667	18.9767	49.2	40.45	124.067	76.3267	108.71
K01023	assT; arylsulfate sulfotransferase [EC:2.8.2.22]	0	0	0	0	0	0	0	0	0	0
K01026	pct; propionate CoA-transferase [EC:2.8.3.1]	4.33333	0	1	0	1	1	0	0	1.33333	4.83333
K01027	OXCT; 3-oxoacid CoA-transferase [EC:2.8.3.5]	0	0	0	0.223333	0.666667	0.666667	1	0	2.33333	0
K01028	E2.8.3.5A, scoA; 3-oxoacid CoA-transferase subunit A [EC:2.8.3.5]	97.2767	11.3333	15.61	12.89	22.8867	32.4433	25.8333	54	47.5	84.8617
K01029	E2.8.3.5B, scoB; 3-oxoacid CoA-transferase subunit B [EC:2.8.3.5]	97.9433	11.3333	15.61	12.89	23.5533	32.4433	25.8333	54	47.5	84.8617
K01031	pcaI; 3-oxoadipate CoA-transferase, alpha subunit [EC:2.8.3.6]	23.86	2.66667	6.66667	3	4.66667	8.33333	13	31.3333	15.89	27.0417
K01032	pcaJ; 3-oxoadipate CoA-transferase, beta subunit [EC:2.8.3.6]	23.86	2.66667	6.66667	3	4.66667	8.66667	13	31.3333	15.89	27.0417
K01034	atoD; acetate CoA/acetoacetate CoA-transferase alpha subunit [EC:2.8.3.8 2.8.3.9]	0.666667	0	2.33333	0	0	0	0	1	1	4.5
K01035	atoA; acetate CoA/acetoacetate CoA-transferase beta subunit [EC:2.8.3.8 2.8.3.9]	0.666667	0	1.66667	0	0	0	0	1	1	2.16667
K01039	gctA; glutaconate CoA-transferase, subunit A [EC:2.8.3.12]	65	2	7.33333	6.33333	6.77667	13	13	61	17	30.805
K01040	gctB; glutaconate CoA-transferase, subunit B [EC:2.8.3.12]	52.3333	2	6	5.33333	4	7	12.3333	33.6667	13.3333	24.1383
K01042	selA; L-seryl-tRNA(Ser) seleniumtransferase [EC:2.9.1.1]	101.76	1.66667	18.11	9.22333	7.06667	24.6233	29.7333	68.6333	49.6467	70.675
K01045	PON; arylesterase / paraoxonase [EC:3.1.1.2 3.1.8.1]	1.33333	0	0	0	0	0	0	0	0	0
K01046	lip, TGL2; triacylglycerol lipase [EC:3.1.1.3]	97.0833	1.52667	8.66667	5.62333	5	11.6667	27.25	54.3333	26.3333	36.3233
K01048	pldB; lysophospholipase [EC:3.1.1.5]	26.31	6.52667	6	7.51	8.53333	23.3667	6.61667	6.73333	8.82333	31.57
K01051	E3.1.1.11; pectinesterase [EC:3.1.1.11]	1.33333	0	0.666667	0	0	0.166667	0	27	2.44667	0.933333
K01053	E3.1.1.17, gnl, RGN; gluconolactonase [EC:3.1.1.17]	60.0767	5	8.83	5.55667	13.3333	26.7233	11.1667	18.3333	18.56	63.765
K01055	pcaD; 3-oxoadipate enol-lactonase [EC:3.1.1.24]	76.86	5.33333	9.66667	7.66667	6.66667	16.3333	25	42.6667	32.2233	57.0417
K01056	PTH1, pth, spoVC; peptidyl-tRNA hydrolase, PTH1 family [EC:3.1.1.29]	236.057	12.86	28.3867	25.7333	32.6433	67.0333	41.6167	151.233	105.66	155.065
K01057	PGLS, pgl, devB; 6-phosphogluconolactonase [EC:3.1.1.31]	145.553	4.86	13.5	8.23333	17.11	38	21.75	97	47.1133	66.5033
K01058	pldA; phospholipase A1/A2 [EC:3.1.1.32 3.1.1.4]	54.81	2.05333	5.61	3.35333	3.86667	6.14333	16.0333	33.7333	16.4333	18.685
K01060	cah; cephalosporin-C deacetylase [EC:3.1.1.41]	5.66667	0	0	1.66667	2.88667	0	0	11.6667	0	5.16667
K01061	E3.1.1.45; carboxymethylenebutenolidase [EC:3.1.1.45]	176.53	12.1933	25.9433	13.6267	29.7533	39.59	37.95	138.4	66.77	134.208
K01066	aes; acetyl esterase [EC:3.1.1.-]	185.053	5.66667	16.6667	9.89	30.11	37.8333	39.8333	98	54.6667	111.778
K01067	E3.1.2.1, ACH1; acetyl-CoA hydrolase [EC:3.1.2.1]	3.66667	0	0.333333	0	0.666667	1.66667	1.33333	1	0.333333	1.33333
K01069	gloB, HAGH; hydroxyacylglutathione hydrolase [EC:3.1.2.6]	156.587	9.86	12.5	6.73333	13.2	32.5333	38.2833	73.7333	41.6567	67.9033
K01070	frmB, ESD, fghA; S-formylglutathione hydrolase [EC:3.1.2.12]	144.197	7.19333	12.5	6.51	9.2	26.2	35.1167	71.0667	42.8233	44.4033
K01071	MCH; medium-chain acyl-[acyl-carrier-protein] hydrolase [EC:3.1.2.21]	2.66667	0	0	0	0	0	0	1	0	4.5
K01073	E3.1.2.20; acyl-CoA hydrolase [EC:3.1.2.20]	0	0	0	0	0	0	0	0	0	0
K01075	E3.1.2.23; 4-hydroxybenzoyl-CoA thioesterase [EC:3.1.2.23]	36	0	2.66667	0.89	1	6.66667	12.3333	12.6667	13.6667	22.8333
K01077	E3.1.3.1, phoA, phoB; alkaline phosphatase [EC:3.1.3.1]	85.67	7.72	13.2767	12.02	5.53333	35.59	31.7	75.0667	40.9367	59.5317
K01078	PHO; acid phosphatase [EC:3.1.3.2]	32.4433	1.33333	5.16667	3	0	4.66667	13	29	12	16.4167
K01079	serB, PSPH; phosphoserine phosphatase [EC:3.1.3.3]	107.17	7.52667	13.6667	7.67667	17.0867	30.8667	27.95	59.4	51.6567	63.9533
K01081	E3.1.3.5; 5'-nucleotidase [EC:3.1.3.5]	116.94	10.86	18.2733	13.2333	21.11	47.6067	35.9167	91	54.6667	81.9583
K01082	cysQ, MET22, BPNT1; 3'(2'), 5'-bisphosphate nucleotidase [EC:3.1.3.7]	135.307	8.52667	12.0533	7.56667	18.8667	39.3667	25.2833	64.0667	34.27	58.765
K01083	E3.1.3.8; 3-phytase [EC:3.1.3.8]	46.3333	1.33333	7.83333	3.66667	0.666667	7	17	47.3333	21.5567	18.4167
K01085	agp; glucose-1-phosphatase [EC:3.1.3.10]	16.5333	0	0	0	0.2	0.366667	6.2	9.73333	5.6	2.06667
K01086	fbp-SEBP; fructose-1,6-bisphosphatase I / sedoheptulose-1,7-bisphosphatase [EC:3.1.3.11 3.1.3.37]	0	0	0	0	1	0	0	0	1.33333	0.833333
K01087	otsB; trehalose 6-phosphate phosphatase [EC:3.1.3.12]	88.1933	5.33333	12.1667	8.5	16.7767	22	14.6667	66.3333	26.6667	66.875
K01089	hisB; imidazoleglycerol-phosphate dehydratase / histidinol-phosphatase [EC:4.2.1.19 3.1.3.15]	20.56	2.52667	1.61	1.84333	3.86667	13.4767	7.11667	11.0667	22.8233	9.44
K01090	E3.1.3.16; protein phosphatase [EC:3.1.3.16]	190.747	11.1933	18.3867	22.1867	29.5533	71.4467	19.25	114.833	43.8367	162.933
K01091	gph; phosphoglycolate phosphatase [EC:3.1.3.18]	462.583	20.5267	48.7767	31.7333	39.9767	93.7567	101.283	240.9	172.107	216.113
K01092	E3.1.3.25, IMPA, suhB; myo-inositol-1(or 4)-monophosphatase [EC:3.1.3.25]	383.557	22.86	41.61	38.4	50.62	89.9567	66.65	254.467	120.597	219.915
K01093	appA; 4-phytase / acid phosphatase [EC:3.1.3.26 3.1.3.2]	0.443333	0	0	0	1.33333	1.83333	1	0	2.33333	0.833333
K01095	pgpA; phosphatidylglycerophosphatase A [EC:3.1.3.27]	91.45	3.52667	6	3.17667	5.53333	19.8667	14.45	23.7333	32.1567	36.9117
K01096	pgpB; phosphatidylglycerophosphatase B [EC:3.1.3.27 3.1.3.81 3.1.3.4 3.6.1.27]	1.11667	1.52667	0	1.17667	0.2	10.7	2.78333	4.73333	2.26667	1.445
K01101	E3.1.3.41; 4-nitrophenyl phosphatase [EC:3.1.3.41]	19.8333	2.33333	2.66667	6	3.66667	7.83333	0	22	13.1667	23.4167
K01104	E3.1.3.48; protein-tyrosine phosphatase [EC:3.1.3.48]	254.917	17.3867	21.33	30.41	36.8633	87.9767	37.8667	104.9	105.993	203.36
K01113	phoD; alkaline phosphatase D [EC:3.1.3.1]	156.19	5.19333	20.4967	11.79	12.9967	43.5567	51.9167	118.667	52.67	85.99
K01114	plc; phospholipase C [EC:3.1.4.3]	80.6633	3.33333	9.33333	7.44667	2.22	10.3333	26.6667	69	44.89	45.6667
K01115	PLD1_2; phospholipase D1/2 [EC:3.1.4.4]	0	0	0	0	0	0	0	0	0	0
K01117	E3.1.4.12; sphingomyelin phosphodiesterase [EC:3.1.4.12]	0	0	0	0	0.11	0	0	0	0	0
K01118	acpD, azoR; FMN-dependent NADH-azoreductase [EC:1.7.1.17]	198.76	9.19333	25.8333	22.8433	7.17667	48.5667	71.4833	155.133	84.7567	114.65
K01119	cpdB; 2',3'-cyclic-nucleotide 2'-phosphodiesterase / 3'-nucleotidase [EC:3.1.4.16 3.1.3.6]	44.7333	11.86	14.3333	15.8433	9.51	41.2333	27.9833	64.4667	34.5333	57.645
K01120	cpdP; 3',5'-cyclic-nucleotide phosphodiesterase [EC:3.1.4.17]	0.443333	0	1.66667	0.223333	0	0	0	0	1.22333	1.5
K01126	E3.1.4.46, glpQ, ugpQ; glycerophosphoryl diester phosphodiesterase [EC:3.1.4.46]	390.867	30.72	55.2733	56.6333	66.5033	136.567	76.5667	262.967	154.427	318.872
K01129	dgt; dGTPase [EC:3.1.5.1]	165.223	8.19333	23.5533	19.3433	28.6433	56.5333	35.6167	133.567	81.66	128.787
K01130	E3.1.6.1, aslA; arylsulfatase [EC:3.1.6.1]	68.1067	4.77333	16.1067	1.93	15.3333	52.06	23	31.3333	21.23	50.46
K01133	betC; choline-sulfatase [EC:3.1.6.6]	38.5833	0	2.33333	0.666667	1	5.66667	12.3333	12.6667	16.6667	15.625
K01134	ARSA; arylsulfatase A [EC:3.1.6.8]	2.27667	0.333333	0.776667	0	1	5.89	3.33333	0	2.22333	3.08333
K01135	ARSB; arylsulfatase B [EC:3.1.6.12]	0	0	0	0	0	0	0	0	0	0
K01136	IDS; iduronate 2-sulfatase [EC:3.1.6.13]	1.16667	0	0.333333	0	1	3.33333	1.66667	0	0	1.75
K01137	GNS; N-acetylglucosamine-6-sulfatase [EC:3.1.6.14]	0	0	0	0	0	0.666667	0	0	0	0
K01138	K01138; uncharacterized sulfatase [EC:3.1.6.-]	9.27333	2.66667	4.10667	1	5.66667	27	6.5	0	5.44667	14.085
K01139	spoT; GTP diphosphokinase / guanosine-3',5'-bis(diphosphate) 3'-diphosphatase [EC:2.7.6.5 3.1.7.2]	39.9767	2.19333	2.16667	1.17667	2.53333	13.7	14.45	10.7333	10.8233	7.23667
K01141	sbcB, exoI; exodeoxyribonuclease I [EC:3.1.11.1]	77.1167	2.86	7.16667	4.84333	2.86667	20.0333	25.45	46.4	27.2667	22.8617
K01142	E3.1.11.2, xthA; exodeoxyribonuclease III [EC:3.1.11.2]	356.25	19.1933	37.7767	27.0667	42.0867	80.1433	81.45	197.567	142.16	197.44
K01144	E3.1.11.5; exodeoxyribonuclease V [EC:3.1.11.5]	13.7467	3.66667	3.44333	1.66667	5	3.11	4	1.33333	15.89	9.57
K01146	xni; protein Xni	1.11667	1.52667	0	1.17667	0.866667	10.7	2.78333	4.73333	2.26667	1.445
K01147	rnb; exoribonuclease II [EC:3.1.13.1]	46.95	3.86	4.66667	4.17667	1.2	17.2	14.7833	49.4	26.2667	28.1117
K01150	endA; deoxyribonuclease I [EC:3.1.21.1]	59.1167	0.193333	2.33333	0.843333	1.86667	4.36667	18.1167	18.4	12.2667	7.945
K01151	nfo; deoxyribonuclease IV [EC:3.1.21.2]	94.7267	4.19333	12.7767	14.8433	22.6433	42.7567	10.7833	91.5667	50.0467	88.1117
K01153	hsdR; type I restriction enzyme, R subunit [EC:3.1.21.3]	122.107	7.86	9.88667	9.56667	14.4433	43.1667	24.25	56.8333	72.7267	79.0067
K01154	hsdS; type I restriction enzyme, S subunit [EC:3.1.21.3]	130.69	6.86	12.9967	9.56667	13.7767	46.61	20.25	69.5	59.9467	80.1183
K01155	E3.1.21.4; type II restriction enzyme [EC:3.1.21.4]	0.666667	0	0	0	0.666667	0	0.5	0	2.55667	0.333333
K01156	res; type III restriction enzyme [EC:3.1.21.5]	5.08333	0	0	0	0.333333	1.33333	1	1.66667	3.66667	4.8
K01159	ruvC; crossover junction endodeoxyribonuclease RuvC [EC:3.1.22.4]	231.39	10.5267	26.3867	19.9	30.31	60.0333	41.6167	150.233	102.327	137.982
K01160	rusA; crossover junction endodeoxyribonuclease RusA [EC:3.1.22.4]	0	0	0	0	0	0.166667	0	0	0	0.5
K01163	K01163; uncharacterized protein	1.83333	0	1	0	0	1.33333	0	4	4.39	8.33333
K01166	E3.1.27.1; ribonuclease T2 [EC:3.1.27.1]	37.86	5.33333	10.6667	6.33333	5.66667	20.6667	19	36.6667	16.89	25.125
K01167	E3.1.27.3; ribonuclease T1 [EC:3.1.27.3]	10.6667	1.33333	0.666667	0	4.44333	3.5	0	2	9	15
K01169	rna; ribonuclease I (enterobacter ribonuclease) [EC:3.1.27.6]	0.443333	0	0	0	0	0.166667	0	0.333333	0	0
K01170	endA; tRNA-intron endonuclease, archaea type [EC:4.6.1.16]	0	0	0	0	0	0	0	1	0	1
K01173	ENDOG; endonuclease G, mitochondrial	33.3033	1.52667	5.33333	3.4	0	6.66667	13.25	30.3333	29.8333	18.4217
K01174	nuc; micrococcal nuclease [EC:3.1.31.1]	55	3.33333	4.33333	7	5	16	2.66667	31.6667	10	33.055
K01175	ybfF; esterase [EC:3.1.-.-]	22.2267	1.52667	0	1.17667	1.86667	10.7	2.78333	4.73333	5.93333	1.445
K01176	AMY, amyA, malS; alpha-amylase [EC:3.2.1.1]	45.8933	4.44	6.77667	11.04	3.64333	18.6433	13.5333	35.4	12.8233	30.5467
K01178	SGA1; glucoamylase [EC:3.2.1.3]	9.33333	0	0	0	0	1.66667	0	0	2.33333	6.16667
K01179	E3.2.1.4; endoglucanase [EC:3.2.1.4]	147.92	6	14.72	22.2267	18.64	45.2	9.2	154.733	58.2133	104.533
K01181	E3.2.1.8, xynA; endo-1,4-beta-xylanase [EC:3.2.1.8]	51.3333	0	1.33333	16.6667	2.11	2	1.16667	49.3333	5.11333	38.4667
K01182	IMA, malL; oligo-1,6-glucosidase [EC:3.2.1.10]	7.77667	2	3	4	0	14.3333	0	5.33333	0	14.8333
K01183	E3.2.1.14; chitinase [EC:3.2.1.14]	87.95	11.2467	14	19.53	1.86333	63.5333	40.6167	112.733	39.49	52.535
K01184	E3.2.1.15; polygalacturonase [EC:3.2.1.15]	0	0	0	0	0	0	0	0	0	0
K01185	E3.2.1.17; lysozyme [EC:3.2.1.17]	24.7833	0	0	0	0.866667	3.86667	6.7	15.7333	5.6	6.06667
K01186	NEU1; sialidase-1 [EC:3.2.1.18]	7.61	0.333333	0.776667	0	1.33	8.55667	1.66667	9.33333	10.5567	8.63833
K01187	malZ; alpha-glucosidase [EC:3.2.1.20]	188.76	11.1933	20.11	17.8433	36.2833	52.8433	35.8167	138.133	84.4267	134.123
K01188	E3.2.1.21; beta-glucosidase [EC:3.2.1.21]	0	0	0	0	0	0	0	0	0	0
K01190	lacZ; beta-galactosidase [EC:3.2.1.23]	29.8067	4	2.44	1	11.8633	19.4733	5.2	18.4	42.4367	28.2467
K01191	MAN2C1; alpha-mannosidase [EC:3.2.1.24]	15.9433	1.66667	0.776667	0	1.22	7.89	5	24.6667	10.2233	20.5283
K01192	E3.2.1.25, MANBA, manB; beta-mannosidase [EC:3.2.1.25]	39.0833	1.52667	1.16667	2.84333	0.666667	12	5.58333	28	16	15.1283
K01193	INV, sacA; beta-fructofuranosidase [EC:3.2.1.26]	25.1767	0.666667	3.66667	5.83333	0.51	4.06667	9.06667	27.4667	10.5333	22.2167
K01194	TREH, treA, treF; alpha,alpha-trehalase [EC:3.2.1.28]	18.11	0.333333	2.11	0.666667	3	2.77667	4	12.3333	12.3333	11.5
K01195	uidA, GUSB; beta-glucuronidase [EC:3.2.1.31]	14.3333	0	0	1	1.33333	1.83333	1.5	13.3333	6.94667	5.16667
K01197	hya; hyaluronoglucosaminidase [EC:3.2.1.35]	0	0	0	0	0.666667	0.666667	0	0	3	0.333333
K01198	xynB; xylan 1,4-beta-xylosidase [EC:3.2.1.37]	16.6667	0	0.666667	3.33333	0.776667	1.33333	0	5.33333	2.44667	11
K01200	pulA; pullulanase [EC:3.2.1.41]	0.916667	0.666667	1.66667	3	0.666667	3	0	1	5.83333	7.3
K01201	GBA, srfJ; glucosylceramidase [EC:3.2.1.45]	3	0.666667	0	0	1.44333	1	0	12	13.7233	3.66667
K01205	NAGLU; alpha-N-acetylglucosaminidase [EC:3.2.1.50]	0	0	0	0	0	0.333333	0	0	4.61333	0.333333
K01206	FUCA; alpha-L-fucosidase [EC:3.2.1.51]	12.1933	3	5.44333	0.666667	11.7767	12.2233	4.33333	8	49.1233	27.5283
K01207	nagZ; beta-N-acetylhexosaminidase [EC:3.2.1.52]	182.977	10.86	22.1667	22.2333	22.8633	57.2	39.2833	110.733	56.7133	133.903
K01208	cd, ma, nplT; cyclomaltodextrinase / maltogenic alpha-amylase / neopullulanase [EC:3.2.1.54 3.2.1.133 3.2.1.135]	0	0	0	0	0	0	0	0	0	0
K01209	abfA; alpha-N-arabinofuranosidase [EC:3.2.1.55]	33.4433	1.66667	8.27667	4.66667	3.77667	8.11	12	45.6667	27.1133	30.795
K01210	E3.2.1.58; glucan 1,3-beta-glucosidase [EC:3.2.1.58]	0	0	0	0	0	0	0	0	0	0.916667
K01212	sacC, levB; levanase [EC:3.2.1.65]	2.22	0.333333	0.443333	0	1	0.443333	0	0	0	1.57833
K01214	ISA, treX; isoamylase [EC:3.2.1.68]	0	0	0	0	0	0	0	0	0	0
K01215	dexB; glucan 1,6-alpha-glucosidase [EC:3.2.1.70]	1.33333	0	0	0	0	0	0	1	0	0
K01216	E3.2.1.73; licheninase [EC:3.2.1.73]	0	0	0	0	0.666667	0.666667	0	0	0	0
K01218	gmuG; mannan endo-1,4-beta-mannosidase [EC:3.2.1.78]	5.33333	0	0	1.66667	0	0	0.666667	16	8.61333	5.66667
K01219	E3.2.1.81; beta-agarase [EC:3.2.1.81]	0	0	0	0	0	0	0	0	0	0
K01220	E3.2.1.85, lacG; 6-phospho-beta-galactosidase [EC:3.2.1.85]	1.33333	0	0	0	0	0	0	1	0	0
K01222	E3.2.1.86A, celF; 6-phospho-beta-glucosidase [EC:3.2.1.86]	15.0333	0.386667	0	1.02	0.42	1.36667	4.36667	23.4	7.43333	13.3233
K01223	E3.2.1.86B, bglA; 6-phospho-beta-glucosidase [EC:3.2.1.86]	14.05	2.19333	3	4.17667	0.8	16.6333	10.3833	23.9333	15.4	23.3117
K01224	E3.2.1.89; arabinogalactan endo-1,4-beta-galactosidase [EC:3.2.1.89]	6.44333	0.333333	0.443333	1.66667	1.11	0.443333	0	10.6667	2.44667	4.91167
K01226	treC; trehalose-6-phosphate hydrolase [EC:3.2.1.93]	14.45	0.86	3.66667	4.51	0.2	4.03333	6.78333	16.4	13.9333	14.445
K01227	E3.2.1.96; mannosyl-glycoprotein endo-beta-N-acetylglucosaminidase [EC:3.2.1.96]	2.33333	0	0	0	0	1	0	3	1.33333	3
K01232	glvA; maltose-6'-phosphate glucosidase [EC:3.2.1.122]	1.33333	0	0	0	0	0.166667	0	0.666667	0	1.33333
K01233	csn; chitosanase [EC:3.2.1.132]	0	0	0	0	0.11	0	0.666667	10.6667	0	0
K01235	aguA; alpha-glucuronidase [EC:3.2.1.139]	6.33333	0	1.16667	1.66667	2	2	1	5.33333	3.89	5.38333
K01236	treZ, glgZ; maltooligosyltrehalose trehalohydrolase [EC:3.2.1.141]	79.5533	2.33333	7.77667	4.94667	12.11	12.7233	15	25.6667	28.0033	44.75
K01239	iunH; purine nucleosidase [EC:3.2.2.1]	95.9467	4.33333	17.61	8	4.2	20.9233	31.5333	89.7333	40.7133	58.08
K01241	amn; AMP nucleosidase [EC:3.2.2.4]	83.06	5.33333	11.3333	5.83333	9.86667	15.7	29.7	48.7333	41.5467	43.2467
K01243	mtnN, mtn, pfs; adenosylhomocysteine nucleosidase [EC:3.2.2.9]	62.4767	7.72	8.33333	14.6867	9.86667	37.3667	14.7	34.4	36.99	71.4433
K01244	MTN; 5'-methylthioadenosine nucleosidase [EC:3.2.2.16]	0	0	0	0	0	0	0	0	0	0
K01246	tag; DNA-3-methyladenine glycosylase I [EC:3.2.2.20]	137.697	9.86	14.9433	10.2333	20.6433	33.81	35.7833	62.7333	62.5467	87.4817
K01247	alkA; DNA-3-methyladenine glycosylase II [EC:3.2.2.21]	138.747	7.33333	22.9433	14.89	17.3333	40.0567	36.1667	85	60.67	97.2083
K01250	rihA; pyrimidine-specific ribonucleoside hydrolase [EC:3.2.-.-]	10.8333	1.33333	1.66667	1.33333	3.77667	3.66667	0	10.3333	0	12.25
K01251	E3.3.1.1, ahcY; adenosylhomocysteinase [EC:3.3.1.1]	236.19	9	25.3867	17.7233	29.4433	47	38.8333	154.5	95.8933	134.015
K01252	entB, dhbB, vibB, mxcF; bifunctional isochorismate lyase / aryl carrier protein [EC:3.3.2.1 6.3.2.14]	26.9767	2.66667	0	2.66667	4.97667	5.7	7.2	9.73333	6.15667	15.9
K01253	EPHX1; microsomal epoxide hydrolase [EC:3.3.2.9]	3.66667	0	0	0	0	0	0	0	0	0
K01255	CARP, pepA; leucyl aminopeptidase [EC:3.4.11.1]	269.167	15.1933	32.4433	27.2333	39.6433	71.9233	49.1167	139.4	78.4367	168.028
K01256	pepN; aminopeptidase N [EC:3.4.11.2]	155.03	12.1933	24.11	14.9	29.1967	43.9767	42.1167	127.4	68.6567	117.543
K01258	pepT; tripeptide aminopeptidase [EC:3.4.11.4]	40.62	12.3867	9.88667	18.02	13.7333	55.9	8.9	17.9667	30.6467	67.5367
K01259	pip; proline iminopeptidase [EC:3.4.11.5]	184.443	12.6667	22.8333	13.2233	16.7767	33.6667	47.8333	124.667	61.89	99.1333
K01261	pepA; glutamyl aminopeptidase [EC:3.4.11.7]	1.33333	0	0	0	0	0	0	1	0	0
K01262	pepP; Xaa-Pro aminopeptidase [EC:3.4.11.9]	281.057	14.3867	37.0533	28.8	33.6433	75.7	56.5333	182.233	144.717	189.577
K01263	E3.4.11.14; cytosol alanyl aminopeptidase [EC:3.4.11.14]	0	0	0	0	0	0	0	0	0	0
K01264	APE3; aminopeptidase Y [EC:3.4.11.15]	0	0	0	0	0	0	0	0	0	0
K01265	map; methionyl aminopeptidase [EC:3.4.11.18]	355.473	20.5267	43.22	37.6233	49.1967	88.5333	65.2833	228.9	146.217	247.407
K01266	dmpA, dap; D-aminopeptidase [EC:3.4.11.19]	28.33	5	6.16667	7	6.66667	13.8333	5.66667	2.33333	15.0033	33.0833
K01267	DNPEP; aspartyl aminopeptidase [EC:3.4.11.21]	50.5	1.33333	3	1.39	2.11	6	11.3333	17	15.89	18.55
K01269	E3.4.11.-; aminopeptidase [EC:3.4.11.-]	0.443333	0	0	0	0	0	0	0	0	0
K01270	pepD; dipeptidase D [EC:3.4.13.-]	19.7267	1.86	2.44333	1.17667	2.53333	13.1433	3.45	4.73333	20.4333	20.99
K01271	pepQ; Xaa-Pro dipeptidase [EC:3.4.13.9]	117.363	6	10.5	10	9.53333	26.7	22.2	62.9	37.9367	56.9
K01273	DPEP; membrane dipeptidase [EC:3.4.13.19]	117.327	6	18.4967	10.1133	22.11	30.39	23	63.5	50.2833	75.4733
K01274	E3.4.13.-; D-alanyl-D-alanine dipeptidase [EC:3.4.13.-]	6.44333	0.333333	0.443333	0	1	0.443333	0	1	0	2.945
K01277	DPP3; dipeptidyl-peptidase III [EC:3.4.14.4]	3.69333	0.333333	1.77667	0	1.66667	1.77667	1.66667	0	4.83333	5.07833
K01278	DPP4, CD26; dipeptidyl-peptidase 4 [EC:3.4.14.5]	55.4967	2.66667	10.3867	5.55667	5.77667	11	17.6667	47	38.4467	43.5167
K01281	pepX; X-Pro dipeptidyl-peptidase [EC:3.4.14.11]	34.3333	0	0	1.66667	0.11	0	0.666667	15.6667	2.33333	14.6667
K01283	ACE, CD143; peptidyl-dipeptidase A [EC:3.4.15.1]	29.7767	0.333333	2.61	0.223333	1.33333	4.55667	4.16667	5	5.55667	6.91667
K01284	dcp; peptidyl-dipeptidase Dcp [EC:3.4.15.5]	76.39	8	15.8867	8.83333	11.5333	16.2533	32.8667	65.0667	53.0467	47.265
K01286	E3.4.16.4; D-alanyl-D-alanine carboxypeptidase [EC:3.4.16.4]	76.8567	12.3333	16.3333	19.1133	20.1033	22.6667	21	50	25.3367	87.375
K01295	cpg; glutamate carboxypeptidase [EC:3.4.17.11]	47.25	6.86	11	7.4	17	28.8333	11.75	28.6667	17.6667	52.99
K01297	ldcA; muramoyltetrapeptide carboxypeptidase [EC:3.4.17.13]	101.777	8.66667	17.9433	16.2233	13.7767	29.9433	29	99.3333	58.2233	85.75
K01299	E3.4.17.19; carboxypeptidase Taq [EC:3.4.17.19]	60.8933	8.52667	8.11	10.51	9.53333	27.7567	6.78333	25.7333	21.3233	49.3617
K01301	NAALAD; N-acetylated-alpha-linked acidic dipeptidase [EC:3.4.17.21]	2.66667	0	2	0.666667	0.666667	1.33333	1	0	2.33333	7.61167
K01302	CPQ; carboxypeptidase Q [EC:3.4.17.-]	1.66667	0	0	0	0	0	0	0	0	0
K01303	APEH; acylaminoacyl-peptidase [EC:3.4.19.1]	1.66667	0	0	0	0	0.333333	0	0	0	0
K01304	pcp; pyroglutamyl-peptidase [EC:3.4.19.3]	29.7833	4.86	2	4.84333	4.53333	12.5333	6.11667	24.4	9.93333	32.195
K01305	iadA; beta-aspartyl-dipeptidase (metallo-type) [EC:3.4.19.-]	0.666667	0	0	0	0	0.166667	0	0	1	1.83333
K01308	yqgT; g-D-glutamyl-meso-diaminopimelate peptidase [EC:3.4.19.11]	6.66667	3.66667	1.66667	6	4.66667	10	0	0	2.33333	23.8333
K01312	PRSS1_2_3; trypsin [EC:3.4.21.4]	0	0	0	0	0	0	0	0	0	0
K01318	sspA; glutamyl endopeptidase [EC:3.4.21.19]	6	0	0	1.66667	0	0	0	0	0	3.33333
K01322	PREP; prolyl oligopeptidase [EC:3.4.21.26]	110.413	9.38667	16.72	11.1333	10.6667	45.8333	30.3333	86.3333	57.28	72.0017
K01338	lon; ATP-dependent Lon protease [EC:3.4.21.53]	332.333	11.5267	33.0533	29.96	35.6433	67.2	52.7833	201.4	137.05	194.26
K01340	E3.4.21.59; tryptase [EC:3.4.21.59]	0	0	0	0	0	0	0	0	0	0
K01342	aprE; subtilisin [EC:3.4.21.62]	3.66667	1.33333	0	1.33333	2.33333	4	0	0	0	9.88833
K01354	ptrB; oligopeptidase B [EC:3.4.21.83]	84.6133	6.72	15.2767	9.52	16.5333	30.31	32.7	61.0667	35.0467	57.56
K01356	lexA; repressor LexA [EC:3.4.21.88]	243.363	11.86	29.7767	25.2333	30.31	68.59	46.2833	176.233	84.1033	153.487
K01358	clpP, CLPP; ATP-dependent Clp protease, protease subunit [EC:3.4.21.92]	374.777	19.1933	39.94	34.9567	52.4167	95.0333	64.45	298.9	135.107	244.427
K01361	E3.4.21.96; lactocepin [EC:3.4.21.96]	0	0	1.66667	0	0	1	0	1	1	5.33333
K01372	BLMH, pepC; bleomycin hydrolase [EC:3.4.22.40]	4.83333	0	0	0	0.666667	0	0.666667	1.33333	13.9467	6.43333
K01378	CYM; chymosin [EC:3.4.23.4]	0	0	0	0	0	0	0	0	0	0
K01387	colA; microbial collagenase [EC:3.4.24.3]	0.75	1.91333	0	1.53	0.11	10.3333	1.41667	0	0	0.135
K01389	MME, CD10; neprilysin [EC:3.4.24.11]	0	0	0	0	0	0	1	0	0	0
K01392	THOP1; thimet oligopeptidase [EC:3.4.24.15]	5	0	1.66667	0.223333	6	2.66667	0	0	1.33333	8.83333
K01399	lasB; pseudolysin [EC:3.4.24.26]	0	0	0	0	0	0	0	0	0	0
K01400	nprE; bacillolysin [EC:3.4.24.28]	0	0	0	0	0	0	0	0	0	0.333333
K01401	aur; aureolysin [EC:3.4.24.29]	1.33333	0	0	0	0	0	0	0	0	0
K01406	prtC; serralysin [EC:3.4.24.40]	24.2	10	20.3333	9	15.2	14.8667	8.86667	17.0667	8.6	35.0667
K01407	ptrA; protease III [EC:3.4.24.55]	0.866667	0	0	0	0.2	0.366667	2.53333	4.73333	2.26667	1.4
K01408	IDE, ide; insulysin [EC:3.4.24.56]	0	0	0	0	0	0	0	0	0	0
K01409	KAE1, tsaD, QRI7; N6-L-threonylcarbamoyladenine synthase [EC:2.3.1.234]	239.39	12.86	28.3867	25.2333	32.6433	67.3667	42.7833	154.4	111.55	156.815
K01414	prlC; oligopeptidase A [EC:3.4.24.70]	119.893	4.86	10.61	5.73333	4.53333	23.9767	32.1167	78.7333	43.6	41.14
K01415	ECE; endothelin-converting enzyme [EC:3.4.24.71]	10.3333	0	1.66667	0.666667	6.66667	3.66667	2.16667	0	4.66667	11.8333
K01416	snpA; snapalysin [EC:3.4.24.77]	4.66667	0	0	1.66667	0.22	0	0.666667	10	0	4.33333
K01419	hslV, clpQ; ATP-dependent HslUV protease, peptidase subunit HslV [EC:3.4.25.2]	148.863	9.52667	18.61	17.1767	19.2	43.2567	31.95	56.2333	52.8267	91.4867
K01420	fnr; CRP/FNR family transcriptional regulator, anaerobic regulatory protein	239.917	12.86	30.33	23.51	24.2	56.6967	52.6167	154.067	118.38	143.405
K01421	yhgE; putative membrane protein	19.8333	5.33333	2	8.5	5.77667	18	1.66667	13.6667	15.6667	40.9167
K01424	E3.5.1.1, ansA, ansB; L-asparaginase [EC:3.5.1.1]	190.23	11.72	19.2767	18.0767	11.0667	52.6767	55.2333	138.633	86.9267	107.052
K01425	glsA, GLS; glutaminase [EC:3.5.1.2]	80.3633	5.52667	4.11	6.01	4.64333	21.6433	17.45	37.0667	23.1567	40.6817
K01426	E3.5.1.4, amiE; amidase [EC:3.5.1.4]	355.747	10.3333	36.2767	21.0567	49.9967	70.9433	56	176.333	95.3367	207.82
K01428	ureC; urease subunit alpha [EC:3.5.1.5]	99.0533	6	10.3333	7.22333	7.88667	12.3333	25.6667	48.6667	27.78	53.89
K01429	ureB; urease subunit beta [EC:3.5.1.5]	112.72	3.66667	7.33333	5.33333	3.77667	9.66667	27.6667	68.3333	29.78	47.7233
K01430	ureA; urease subunit gamma [EC:3.5.1.5]	115.72	5	7.33333	6.66667	6.11	12.3333	27.6667	68.3333	33.4467	55.7233
K01432	AFMID; arylformamidase [EC:3.5.1.9]	5.08333	2	1.33333	1.66667	5	4.66667	1.33333	0	1.33333	12.375
K01433	purU; formyltetrahydrofolate deformylase [EC:3.5.1.10]	174.53	11.86	18.2767	11.1767	16.0867	47.59	49.95	106.4	58.2133	92.625
K01434	E3.5.1.11; penicillin amidase [EC:3.5.1.11]	90.6367	6	11.61	7.89	11.5533	18.7233	17.6667	41	42.5033	59.4583
K01436	K01436; amidohydrolase [EC:3.5.1.-]	83.72	4.33333	8.11	7	10.4433	20.4433	12	61.3333	23.7233	56.3067
K01437	ASPA, aspA; aspartoacylase [EC:3.5.1.15]	0	1.33333	0	1	0	10.3333	0	0	0	0
K01438	argE; acetylornithine deacetylase [EC:3.5.1.16]	192.863	7.52667	20.3867	8.06667	18.6433	33.8667	41.2833	74.4	75.5467	99.7317
K01439	dapE; succinyl-diaminopimelate desuccinylase [EC:3.5.1.18]	188.087	10.86	17.5	18.5667	25.9767	53.7	38.6167	102.067	58.6567	114.32
K01442	E3.5.1.24; choloylglycine hydrolase [EC:3.5.1.24]	21.61	1.33333	0	1	1	11	4.66667	5	6.89	6.5
K01443	nagA, AMDHD2; N-acetylglucosamine-6-phosphate deacetylase [EC:3.5.1.25]	139.197	15.86	22.61	20.8433	23.6433	59.9233	37.1167	98.4	70.7133	108.625
K01444	AGA, aspG; N4-(beta-N-acetylglucosaminyl)-L-asparaginase [EC:3.5.1.26]	21.72	1.33333	4.38667	0	4.66667	8.66667	7.5	6.33333	19.78	11.7783
K01446	PGRP; peptidoglycan recognition protein	0	0	0	0	0	0	0	0	0	0
K01447	xlyAB; N-acetylmuramoyl-L-alanine amidase [EC:3.5.1.28]	61.3033	4.33333	5.44333	1.66667	9.66667	7.77667	10.6667	10	9.55667	19.4033
K01448	amiABC; N-acetylmuramoyl-L-alanine amidase [EC:3.5.1.28]	310.29	23.5267	30.0533	36.9	45.3767	84.9867	52.0167	197.2	130.637	224.143
K01449	cwlJ, sleB; N-acetylmuramoyl-L-alanine amidase [EC:3.5.1.28]	22.6667	5.33333	6.66667	14.3333	8	17.6667	0	12.3333	15	47.6667
K01451	hipO; hippurate hydrolase [EC:3.5.1.32]	105.503	9.66667	17.4433	8.33333	22.6433	38.9233	29.2	46.7333	48.27	82.6083
K01452	E3.5.1.41; chitin deacetylase [EC:3.5.1.41]	3	2	0	1.33333	2.33333	2.66667	0	0	0	6.83333
K01453	nylB; 6-aminohexanoate-oligomer exohydrolase [EC:3.5.1.46]	26.86	1.33333	6.66667	3.66667	0	9.66667	17.5	38.6667	20.5567	25.0417
K01455	E3.5.1.49; formamidase [EC:3.5.1.49]	41	0	0	0	4.66667	5.33333	0	0	0	13
K01457	atzF; allophanate hydrolase [EC:3.5.1.54]	23.8667	1.33333	2	3.33333	2.2	15.2	9.86667	23.4	11.2667	17.9833
K01458	hutG; N-formylglutamate deformylase [EC:3.5.1.68]	20.7767	2	5.16667	3	1	7.33333	9.33333	24	18.89	23
K01459	E3.5.1.77; N-carbamoyl-D-amino-acid hydrolase [EC:3.5.1.77]	0	0	0	0	0	0	0	0	0	0
K01460	gsp; glutathionylspermidine amidase/synthetase [EC:3.5.1.78 6.3.1.8]	0	0	0	0	0	0.166667	0	0.333333	0	0
K01461	E3.5.1.82; N-acyl-D-glutamate deacylase [EC:3.5.1.82]	0	0	0	0	0	0	0	0	0	0
K01462	PDF, def; peptide deformylase [EC:3.5.1.88]	352.777	25.0533	44.72	40.69	48.3067	108.533	70.2	232.567	141.55	261.263
K01464	DPYS, dht, hydA; dihydropyrimidinase [EC:3.5.2.2]	72.97	6	12	8.22333	5.44333	16.8333	20.6667	63	29.2233	64.5417
K01465	URA4, pyrC; dihydroorotase [EC:3.5.2.3]	368.53	21.86	47.2733	30.9	52.51	94.4	74.9833	205.633	158.32	227.298
K01466	allB; allantoinase [EC:3.5.2.5]	18.8333	3.33333	4.66667	1.89	10.4433	8.33333	0.666667	10	2.66667	21.25
K01467	ampC; beta-lactamase class C [EC:3.5.2.6]	32.6167	1.33333	4.5	1.66667	2.2	15.3667	12.8667	23.0667	13.1567	10.3583
K01468	hutI, AMDHD1; imidazolonepropionase [EC:3.5.2.7]	132.003	9.52667	19.2767	16.9	19.31	38.9767	31.1167	76.4	65.5467	99.5983
K01469	OPLAH, OXP1, oplAH; 5-oxoprolinase (ATP-hydrolysing) [EC:3.5.2.9]	49.5267	3	5	3	4.44333	10.1667	16	43.6667	14.5567	29.375
K01470	E3.5.2.10; creatinine amidohydrolase [EC:3.5.2.10]	78.8567	4.33333	11.8867	5.22333	15.7767	20.5	9.66667	51.3333	22.3367	60.765
K01471	nylA; 6-aminohexanoate-cyclic-dimer hydrolase [EC:3.5.2.12]	0	0	0	0	0	0	0	0	0	0.833333
K01473	hyuA; N-methylhydantoinase A [EC:3.5.2.14]	84.5	4	12.3333	8.33333	15.6667	24.5	7.66667	31.6667	9.5	60.5
K01474	hyuB; N-methylhydantoinase B [EC:3.5.2.14]	79.8333	4	12.3333	8.33333	15.6667	24.5	6.33333	36.3333	9.5	57.4167
K01476	E3.5.3.1, rocF, arg; arginase [EC:3.5.3.1]	66.8033	5	7.5	11	9.11	15	9.33333	21.6667	21.6133	49.5417
K01477	alc, ALLC; allantoicase [EC:3.5.3.4]	44	0	2	0.89	0.11	2.33333	11.3333	23.6667	20.6667	17
K01478	arcA; arginine deiminase [EC:3.5.3.6]	39.9167	2.19333	5.33333	3.51	12.11	17.6667	11.5833	32.6667	15.3333	34.045
K01479	hutG; formiminoglutamase [EC:3.5.3.8]	80.42	9.52667	9.11	11.01	10.8667	37.6433	23.7833	28.7333	33.2133	41.515
K01480	speB; agmatinase [EC:3.5.3.11]	117.863	9.86	11.7767	13.9567	21.31	38.31	15.1167	44.9	36.27	85.0983
K01481	E3.5.3.15; protein-arginine deiminase [EC:3.5.3.15]	4	0	0	0.223333	0	0	0	0	0	1.83333
K01482	DDAH, ddaH; dimethylargininase [EC:3.5.3.18]	2.33333	0	0	0	0.11	0	1	0	0	0.5
K01483	allA; ureidoglycolate lyase [EC:4.3.2.3]	53.86	2.66667	5	2.55667	3	6.5	13	12.6667	23.5567	27.5417
K01484	astB; succinylarginine dihydrolase [EC:3.5.3.23]	69.5333	2.66667	7.66667	4.66667	4.53333	19.0333	22.5333	41.4	28.9333	23.7333
K01485	codA; cytosine deaminase [EC:3.5.4.1]	121.837	6.52667	12.1667	7.84333	4.75333	29.3667	41.45	95.7333	46.9333	66.7783
K01486	ade; adenine deaminase [EC:3.5.4.2]	70.69	9.33333	15	16.3333	15.3333	26.6667	3.33333	23.1667	30.7233	73.2917
K01487	E3.5.4.3, guaD; guanine deaminase [EC:3.5.4.3]	81.6133	4.66667	6.66667	5.22333	1.53333	21.3667	26.8667	43.0667	34.49	40.5533
K01488	add, ADA; adenosine deaminase [EC:3.5.4.4]	160.697	11.0533	22.3333	15.5767	15.3067	52.5333	48.2	135.067	70.99	116.157
K01489	cdd, CDA; cytidine deaminase [EC:3.5.4.5]	102.697	10.5267	17.5533	19.0667	24.9767	43.8667	24.6167	78.9	56.4367	106.357
K01491	folD; methylenetetrahydrofolate dehydrogenase (NADP+) / methenyltetrahydrofolate cyclohydrolase [EC:1.5.1.5 3.5.4.9]	241.277	14.1933	28.3867	26.5667	32.7533	80.7	46.45	138.9	101.327	158.815
K01492	purNH; phosphoribosylglycinamide/phosphoribosylaminoimidazolecarboxamide formyltransferase [EC:2.1.2.2 2.1.2.3]	0	0	0	0	0	0	0	0	1.33333	0.666667
K01493	comEB; dCMP deaminase [EC:3.5.4.12]	52.9433	4.86	5.11	10.4	9	28.4433	0.916667	13.1667	32.2233	53.1233
K01494	dcd; dCTP deaminase [EC:3.5.4.13]	189.947	8.66667	23.2767	14.1667	24.9767	36.7567	40.7	140.067	73.4367	103.942
K01495	GCH1, folE; GTP cyclohydrolase IA [EC:3.5.4.16]	241.667	12.5267	29.83	22.5667	33.6433	65.1433	50.95	157.233	123.993	154.427
K01496	hisI; phosphoribosyl-AMP cyclohydrolase [EC:3.5.4.19]	115.747	7	14.4433	9.16667	16.11	26.39	26.1667	62.6667	48.4467	72.4583
K01497	ribA, RIB1; GTP cyclohydrolase II [EC:3.5.4.25]	113.7	11.3867	14	14.2433	16.0867	39.7	27.2	62.4	39.2667	64.0733
K01499	mch; methenyltetrahydromethanopterin cyclohydrolase [EC:3.5.4.27]	5.27667	0.333333	0.776667	0	1	4.22333	1.66667	0	2.22333	3.41667
K01501	E3.5.5.1; nitrilase [EC:3.5.5.1]	78.22	4	13	5.33333	5.66667	14.5	22.6667	39.6667	38.8333	36.7783
K01502	E3.5.5.7; aliphatic nitrilase [EC:3.5.5.7]	4.66667	0	0.333333	0	0	5.66667	1.33333	1	1	11.6667
K01505	E3.5.99.7; 1-aminocyclopropane-1-carboxylate deaminase [EC:3.5.99.7]	45.22	3	7.77667	3	4.77667	6.77667	16.3333	35.6667	27.8333	26.2783
K01507	ppa; inorganic pyrophosphatase [EC:3.6.1.1]	189.833	9.52667	19.6633	11.5667	26.31	43.1433	44.95	106.733	77.6033	108.502
K01512	acyP; acylphosphatase [EC:3.6.1.7]	155.393	6.86	16.9433	13.9	19.6433	42.59	19.2833	83.0667	50.2133	91.0283
K01515	nudF; ADP-ribose pyrophosphatase [EC:3.6.1.13]	227.587	13.3867	31.9433	25.41	27.9767	75.9233	47.8667	173.9	94.2133	150.99
K01520	dut, DUT; dUTP pyrophosphatase [EC:3.6.1.23]	193.863	9	24.2767	18.0567	31.6433	45.4767	36.5333	106.567	84.0467	132.187
K01521	cdh; CDP-diacylglycerol pyrophosphatase [EC:3.6.1.26]	19.6433	0	0	0	1.2	0.366667	6.2	9.73333	5.6	2.56667
K01523	hisE; phosphoribosyl-ATP pyrophosphohydrolase [EC:3.6.1.31]	119.913	6	14.3333	8.83333	13.7767	19.5	25	67.3333	41.5567	66.375
K01524	ppx-gppA; exopolyphosphatase / guanosine-5'-triphosphate,3'-diphosphate pyrophosphatase [EC:3.6.1.11 3.6.1.40]	281.06	19.72	30.3867	25.4667	46.2867	82.9533	55.9	159.3	109.93	185.947
K01525	apaH; bis(5'-nucleosyl)-tetraphosphatase (symmetrical) [EC:3.6.1.41]	90.7833	3.52667	8.5	4.84333	2.86667	20.5333	25.45	47.4	34.6	34.5283
K01531	mgtA, mgtB; Mg2+-importing ATPase [EC:3.6.3.2]	35.8367	3	5.44333	3	1.31	8.59	19.3667	35.7333	18.7133	23.4417
K01533	copB; Cu2+-exporting ATPase [EC:3.6.3.4]	139.3	13.1933	17.94	10.5667	21	41.5533	34.25	61	49.56	86.4717
K01534	zntA; Cd2+/Zn2+-exporting ATPase [EC:3.6.3.3 3.6.3.5]	149.333	13.1933	19.7733	21.1767	19.5333	57.0867	38.6167	120.733	62.77	115.983
K01535	PMA1, PMA2; H+-transporting ATPase [EC:3.6.3.6]	0	0	0	0	0	0	0	0	0	0.666667
K01537	E3.6.3.8; Ca2+-transporting ATPase [EC:3.6.3.8]	67.9167	3	9	11.89	11	22.5	4.16667	90	36.4467	60.9383
K01545	kdpF; K+-transporting ATPase ATPase F chain	14	0	2	0.666667	0	2.33333	5.33333	12.6667	6.33333	5.5
K01546	kdpA; K+-transporting ATPase ATPase A chain [EC:3.6.3.12]	93.7267	5	12.2767	8.55667	8.64333	15.2567	28.3667	68.4	40.88	54.1083
K01547	kdpB; K+-transporting ATPase ATPase B chain [EC:3.6.3.12]	92.3933	5	12.2767	8.33333	8.64333	15.2567	27.8667	63.0667	40.88	52.6083
K01548	kdpC; K+-transporting ATPase ATPase C chain [EC:3.6.3.12]	92.7267	3	9.27667	6.89	4.64333	13.2567	27.3667	68.4	40.88	49.1083
K01551	arsA, ASNA1, GET3; arsenite/tail-anchored protein-transporting ATPase [EC:3.6.3.16 3.6.3.-]	79.3333	2	5.33333	2.66667	11.7767	15	10.6667	65.3333	11.5	38.0833
K01555	FAH, fahA; fumarylacetoacetase [EC:3.7.1.2]	53.11	0.333333	6.44333	3	9.11	10.4433	12	24	34.39	40.7783
K01556	KYNU, kynU; kynureninase [EC:3.7.1.3]	74.7767	6	12.61	10	12.11	22.2767	18.1667	46.6667	41.89	73.195
K01560	E3.8.1.2; 2-haloacid dehalogenase [EC:3.8.1.2]	164.663	10.6667	20.11	14	27.4433	36.61	27.3333	77.3333	51.5033	104.195
K01561	dehH; haloacetate dehalogenase [EC:3.8.1.3]	33.75	4	6	5	10.6667	8	0.666667	5.33333	11.3333	34.4583
K01563	dhaA; haloalkane dehalogenase [EC:3.8.1.5]	80.9433	0.333333	1.94333	1.22333	4	5.55667	6.83333	31	5.55667	11.6667
K01565	SGSH; N-sulfoglucosamine sulfohydrolase [EC:3.10.1.1]	0	0	0	0	0	0	0	0	0	0
K01567	pdaA; peptidoglycan-N-acetylmuramic acid deacetylase [EC:3.5.1.-]	8.33333	2.33333	2	5.33333	2.33333	7	0	0	3.33333	18.1667
K01569	oxdD; oxalate decarboxylase [EC:4.1.1.2]	4.11	1.66667	0.443333	1.33333	3.33333	3.55667	0.5	0	2.22333	8.5
K01571	oadA; oxaloacetate decarboxylase, alpha subunit [EC:4.1.1.3]	28.9167	1.52667	0.666667	1.84333	3	12.5	0.25	6.16667	3.66667	9.295
K01572	oadB; oxaloacetate decarboxylase, beta subunit [EC:4.1.1.3]	29.75	1.52667	0.666667	1.17667	2.33333	11.3333	0.25	17.3333	18.8333	10.2117
K01573	oadG; oxaloacetate decarboxylase, gamma subunit [EC:4.1.1.3]	21.4167	1.52667	0	1.17667	1.66667	10.3333	0.25	0	7.66667	0.378333
K01574	adc; acetoacetate decarboxylase [EC:4.1.1.4]	16.6667	0	0	0	0	1.33333	0.666667	0	6.33333	10.3333
K01575	alsD, budA, aldC; acetolactate decarboxylase [EC:4.1.1.5]	2.2	0	0.333333	0.5	0.2	0.2	3.03333	5.73333	3.49	1.76167
K01576	mdlC; benzoylformate decarboxylase [EC:4.1.1.7]	24.6667	0	1.33333	3.33333	2.77667	8.33333	0	22	0	18
K01577	oxc; oxalyl-CoA decarboxylase [EC:4.1.1.8]	3	0	0	0	0	2	0	0	0	2.83333
K01578	MLYCD; malonyl-CoA decarboxylase [EC:4.1.1.9]	14	2.66667	3	1.66667	4	4.5	2.33333	0	2.33333	15.3333
K01579	panD; aspartate 1-decarboxylase [EC:4.1.1.11]	141.17	6	15.72	16.6667	22.6433	38.7	25.8667	92.2333	76.38	98.2283
K01580	E4.1.1.15, gadB, gadA, GAD; glutamate decarboxylase [EC:4.1.1.15]	43.1367	2.86	4.66667	4.84333	2.77667	14.3333	13.25	29.6667	10.6133	15.2117
K01581	E4.1.1.17, ODC1, speC, speF; ornithine decarboxylase [EC:4.1.1.17]	87.92	4.86	6.33333	2.51	10.5333	11.8667	20.1167	23.4	18.7167	32.82
K01582	E4.1.1.18, ldcC, cadA; lysine decarboxylase [EC:4.1.1.18]	17.6167	2.19333	2.33333	6.17667	4.2	7.86667	4.11667	18.0667	7.26667	19.945
K01583	E4.1.1.19; arginine decarboxylase [EC:4.1.1.19]	0	0	0	0	0	0	0	1	0	0
K01584	adiA; arginine decarboxylase [EC:4.1.1.19]	56	2.66667	5.33333	4	1	19.3333	20	37.3333	23	24.6667
K01585	speA; arginine decarboxylase [EC:4.1.1.19]	104.753	4.52667	9.38667	2.73333	6.86667	26.0333	26.7833	49.0667	42.88	39.0783
K01586	lysA; diaminopimelate decarboxylase [EC:4.1.1.20]	263.557	15.0533	33.5533	32.91	40.64	74.3667	51.7	191.9	114.993	188.61
K01588	purE; 5-(carboxyamino)imidazole ribonucleotide mutase [EC:5.4.99.18]	227.723	12.86	27.72	23.9	32.6433	67.0333	41.6167	136.9	96.3267	152.815
K01589	purK; 5-(carboxyamino)imidazole ribonucleotide synthase [EC:6.3.4.18]	171.64	12.86	18.72	15.5667	23.31	51.5333	35.95	110.733	71.27	104.265
K01590	hdc, HDC; histidine decarboxylase [EC:4.1.1.22]	0	0	0	0	0	0	0.666667	10.6667	0	0
K01591	pyrF; orotidine-5'-phosphate decarboxylase [EC:4.1.1.23]	230.723	14.1933	29.3867	25.2333	34.9767	69.7	41.6167	136.9	96.3267	159.315
K01592	TYDC; tyrosine decarboxylase [EC:4.1.1.25]	0	0	0	0	0	0	0	0	0	0
K01593	DDC, TDC; aromatic-L-amino-acid/L-tryptophan decarboxylase [EC:4.1.1.28 4.1.1.105]	9.66667	0	2	2.55667	1.33333	1.33333	2	4.66667	8.66667	11.555
K01594	CSAD; sulfinoalanine decarboxylase [EC:4.1.1.29]	0	0	0	0	0	0	0	0	0	0.5
K01595	ppc; phosphoenolpyruvate carboxylase [EC:4.1.1.31]	171.837	9.52667	19.61	12.0667	15.31	35.31	44.2833	112.4	67.3233	90.4733
K01596	E4.1.1.32, pckA, PCK; phosphoenolpyruvate carboxykinase (GTP) [EC:4.1.1.32]	44.6667	2.66667	6.33333	8.05667	7.11	12.5	11	69	20.1667	41.75
K01597	MVD, mvaD; diphosphomevalonate decarboxylase [EC:4.1.1.33]	17.7767	0.333333	1.11	0.89	1	1.11	0.666667	22	17.6667	14.2783
K01598	PPCDC, coaC; phosphopantothenoylcysteine decarboxylase [EC:4.1.1.36]	0.443333	0.333333	0.443333	0	0	1.22333	0	1	2.22333	0.666667
K01599	hemE, UROD; uroporphyrinogen decarboxylase [EC:4.1.1.37]	231.307	12.86	27.72	23.5667	32.6433	58.0333	39.95	153.9	95.6033	150.682
K01601	rbcL; ribulose-bisphosphate carboxylase large chain [EC:4.1.1.39]	22.0833	0	1.66667	0	1	1.83333	2.66667	21.6667	13.89	19.7083
K01602	rbcS; ribulose-bisphosphate carboxylase small chain [EC:4.1.1.39]	30	1	0	0	1	1	2.66667	19.6667	6.33333	7.41667
K01607	pcaC; 4-carboxymuconolactone decarboxylase [EC:4.1.1.44]	175.81	6.19333	19.3333	10.6767	18.6433	29.0333	45.1167	103.067	76.88	105.62
K01608	gcl; tartronate-semialdehyde synthase [EC:4.1.1.47]	32.75	1.33333	2	0.666667	1.11	6.5	10.3333	17.3333	15.6667	15.875
K01609	trpC; indole-3-glycerol phosphate synthase [EC:4.1.1.48]	225.44	11.3333	26.72	20.8333	30.11	53.3333	38.6667	126.833	92.8367	143.87
K01610	E4.1.1.49, pckA; phosphoenolpyruvate carboxykinase (ATP) [EC:4.1.1.49]	121.447	8.86	10.5533	10.1767	17.5333	33.8667	19.1167	34.7333	59.9367	61.9267
K01611	speD, AMD1; S-adenosylmethionine decarboxylase [EC:4.1.1.50]	81.81	5	13.1667	13	8.86667	18.2	26.8667	50.9	32.7133	52.8167
K01613	psd, PISD; phosphatidylserine decarboxylase [EC:4.1.1.65]	156.113	10.1933	18.2767	15.7333	20.9767	41.6433	37.2833	77.5667	81.77	102.732
K01615	gcdA; glutaconyl-CoA decarboxylase [EC:4.1.1.70]	0	0	0	0	0	0	0	0	2.44667	2
K01616	kgd; 2-oxoglutarate decarboxylase [EC:4.1.1.71]	3.16667	0	0	0.5	1	0	1	5.66667	0	1.91667
K01617	dmpH, xylI, nahK; 2-oxo-3-hexenedioate decarboxylase [EC:4.1.1.77]	9.33333	0	0.333333	1.66667	0	1.66667	1.33333	1	0.333333	4.66667
K01619	deoC, DERA; deoxyribose-phosphate aldolase [EC:4.1.2.4]	137.537	12.86	18.8867	19.9	25.8433	57.0667	29.3167	110.633	67.0367	132.632
K01620	ltaE; threonine aldolase [EC:4.1.2.48]	229.64	8.52667	19.8867	15.4	29.0867	53.3667	35.1167	111.9	78.16	124.315
K01621	xfp, xpk; xylulose-5-phosphate/fructose-6-phosphate phosphoketolase [EC:4.1.2.9 4.1.2.22]	60.4433	1	1.66667	3.33333	2.44333	5.66667	9.33333	65.3333	16.5567	26.055
K01622	K01622; fructose 1,6-bisphosphate aldolase/phosphatase [EC:4.1.2.13 3.1.3.11]	5.5	0	0	0	1.66667	0	0	1	0	1
K01623	ALDO; fructose-bisphosphate aldolase, class I [EC:4.1.2.13]	64.5267	0	1.5	0	3.66667	6	6	7	13	16.4583
K01624	FBA, fbaA; fructose-bisphosphate aldolase, class II [EC:4.1.2.13]	187.447	10.5267	18.4433	20.3433	27.0867	55.9767	34.7833	140.9	101.047	138.148
K01625	eda; 2-dehydro-3-deoxyphosphogluconate aldolase / (4S)-4-hydroxy-2-oxoglutarate aldolase [EC:4.1.2.14 4.1.3.42]	205.973	14.9133	24.72	22.1967	27.0867	64.2	54.1167	117.733	85.66	138.488
K01626	E2.5.1.54, aroF, aroG, aroH; 3-deoxy-7-phosphoheptulonate synthase [EC:2.5.1.54]	285.263	15.2467	24.7767	19.92	21.71	82.8233	80.5167	174.533	105.413	130.182
K01627	kdsA; 2-dehydro-3-deoxyphosphooctonate aldolase (KDO 8-P synthase) [EC:2.5.1.55]	141.39	8.19333	16.3867	11.8433	15.5333	38.2	31.45	55.7333	74.8267	74.1483
K01628	fucA; L-fuculose-phosphate aldolase [EC:4.1.2.17]	84.1367	1.66667	15.11	9.33333	10.7767	23.39	16	71.8333	33.4467	59.1533
K01629	rhaD; rhamnulose-1-phosphate aldolase [EC:4.1.2.19]	1.66667	0	0	0	0	0.166667	0	6	2.5	0.966667
K01630	garL; 2-dehydro-3-deoxyglucarate aldolase [EC:4.1.2.20]	12.1433	0.333333	2.44333	0	1.2	4.59	2.53333	4.73333	10.8233	10.595
K01631	dgoA; 2-dehydro-3-deoxyphosphogalactonate aldolase [EC:4.1.2.21]	32.86	2.66667	6.16667	2.33333	7	9.5	9.16667	13	14.5567	24.875
K01633	folB; 7,8-dihydroneopterin aldolase/epimerase/oxygenase [EC:4.1.2.25 5.1.99.8 1.13.11.81]	213.17	10.5267	16.9433	16.5667	26.6433	50.4767	39.95	109.567	84.27	126.065
K01635	lacD; tagatose 1,6-diphosphate aldolase [EC:4.1.2.40]	3.77667	2.33333	3.44333	1.66667	3	2.89	0	7.66667	5.72333	7.5
K01637	E4.1.3.1, aceA; isocitrate lyase [EC:4.1.3.1]	121.477	9.86	15.1667	14.2333	11.9767	35.0333	29.2833	65.4	44.1567	65.6533
K01638	aceB, glcB; malate synthase [EC:2.3.3.9]	152.727	11.3867	15.1667	14.41	15.7533	39.5333	35.5333	72.0667	53.1567	81.865
K01639	E4.1.3.3, nanA, NPL; N-acetylneuraminate lyase [EC:4.1.3.3]	3.61	0.333333	1.77667	0	1	5.39	1.66667	1.33333	4.39	5.58333
K01640	E4.1.3.4, HMGCL, hmgL; hydroxymethylglutaryl-CoA lyase [EC:4.1.3.4]	162.97	7.72	16.61	13.91	18.7767	51.11	33.8333	91	62.1133	102.743
K01641	E2.3.3.10; hydroxymethylglutaryl-CoA synthase [EC:2.3.3.10]	26.3333	0.666667	2.33333	1.55667	0	0.666667	4	34.6667	12.8333	16.1667
K01643	citF; citrate lyase subunit alpha / citrate CoA-transferase [EC:2.8.3.10]	1.53333	0	0	0	0.866667	0.366667	2.53333	4.73333	3.26667	2.73333
K01644	citE; citrate lyase subunit beta / citryl-CoA lyase [EC:4.1.3.34]	98.7533	8	16	11	34.7533	31.0333	23.2	60.0667	35.0467	105.9
K01646	citD; citrate lyase subunit gamma (acyl carrier protein)	0.866667	0	0	0	0.2	0.366667	2.53333	4.73333	3.26667	1.73333
K01647	CS, gltA; citrate synthase [EC:2.3.3.1]	313.39	20.1933	43.22	35.8467	50.64	92.3667	55.95	218.9	127.27	234.578
K01649	leuA, IMS; 2-isopropylmalate synthase [EC:2.3.3.13]	409.477	20.1933	45.83	41.9	53.62	103.957	74.15	290.467	168.983	258.923
K01652	E2.2.1.6L, ilvB, ilvG, ilvI; acetolactate synthase I/II/III large subunit [EC:2.2.1.6]	589.91	30.3867	64.1633	47.6333	73.44	138.39	119.333	325	197.283	341.877
K01653	E2.2.1.6S, ilvH, ilvN; acetolactate synthase I/III small subunit [EC:2.2.1.6]	212.007	12.86	26.22	24.3433	31.1767	63.4	39.8167	150.633	101.48	145.798
K01654	E2.5.1.56, neuB; N-acetylneuraminate synthase [EC:2.5.1.56]	63.4433	1.66667	5.44333	6.66667	9.77667	7.11	5	49	28.0567	32.2783
K01655	LYS21, LYS20; homocitrate synthase [EC:2.3.3.14]	0	0	0	0	0	0	0	0	0	2.16667
K01657	trpE; anthranilate synthase component I [EC:4.1.3.27]	256.28	15.5267	27.8867	24.9	28.9767	67.3667	46.2833	165.9	111.88	152.523
K01658	trpG; anthranilate synthase component II [EC:4.1.3.27]	237.363	11.5267	28.72	21.2333	31.5333	66.2	43.2833	144.9	102.88	139.69
K01659	prpC; 2-methylcitrate synthase [EC:2.3.3.5]	89.9167	4.19333	8.5	5.34333	1.66667	22	22.9167	42.6667	31	31.3783
K01661	menB; naphthoate synthase [EC:4.1.3.36]	85.31	6.52667	8.77667	9.9	15.8667	34.9767	7.11667	62.4	38.6567	63.69
K01662	dxs; 1-deoxy-D-xylulose-5-phosphate synthase [EC:2.2.1.7]	213.39	12.86	21.72	21.01	32.0867	61.3667	41.2833	124.567	95.27	139.282
K01663	HIS7; glutamine amidotransferase / cyclase [EC:2.4.2.- 4.1.3.-]	0	0	0	0	0	0	0	0	0	0.5
K01664	pabA; para-aminobenzoate synthetase component II [EC:2.6.1.85]	28.95	7.19333	5.66667	10.51	7.31	21.3667	4.45	27.0667	15.9333	37.39
K01665	pabB; para-aminobenzoate synthetase component I [EC:2.6.1.85]	103.447	8.86	10.8867	12.4	13.31	32.0333	22.45	49.4	43.1033	57.065
K01666	mhpE; 4-hydroxy 2-oxovalerate aldolase [EC:4.1.3.39]	25	2.66667	2.33333	4.33333	12.11	11.5	4.16667	14	2.89	34.6667
K01667	tnaA; tryptophanase [EC:4.1.99.1]	5.16667	0.193333	0	0.176667	0.666667	1.16667	0.25	6.66667	4	7.21167
K01668	E4.1.99.2; tyrosine phenol-lyase [EC:4.1.99.2]	1	0	0	0	0	0	0	5.66667	1.16667	0
K01669	phrB; deoxyribodipyrimidine photo-lyase [EC:4.1.99.3]	236.39	14.0533	21.83	13.7433	25.9767	60.9767	38.8667	144.733	83.0467	107.81
K01671	yihT; sulfofructosephosphate aldolase [EC:4.1.2.57]	0	0	0	0	0	0.166667	0	0	0	0
K01673	cynT, can; carbonic anhydrase [EC:4.2.1.1]	317.62	19.86	39.2733	29.0133	38.5933	81.2133	87.35	224.867	121.973	203.185
K01674	cah; carbonic anhydrase [EC:4.2.1.1]	14.8333	4.38667	4.66667	5.68667	4.33333	16.6667	9.83333	24.3333	10	19.09
K01676	E4.2.1.2A, fumA, fumB; fumarate hydratase, class I [EC:4.2.1.2]	124.393	7.86	14.8333	13.7333	15.31	33.7	29.45	58.4	51.3233	77.3983
K01677	E4.2.1.2AA, fumA; fumarate hydratase subunit alpha [EC:4.2.1.2]	7.08333	0	3	1	1.33333	3.16667	0	7.16667	1	9.25
K01678	E4.2.1.2AB, fumB; fumarate hydratase subunit beta [EC:4.2.1.2]	7.08333	0	3	1	1.33333	3.16667	0	7.16667	1	9.25
K01679	E4.2.1.2B, fumC, FH; fumarate hydratase, class II [EC:4.2.1.2]	240.64	14.1933	27.3867	21.9	30.6433	73.0333	47.45	138.4	92.4933	141.348
K01681	ACO, acnA; aconitate hydratase [EC:4.2.1.3]	297.25	12.1933	37.6633	25.79	34.6433	64.81	61.6167	172.567	125.827	176.51
K01682	acnB; aconitate hydratase 2 / 2-methylisocitrate dehydratase [EC:4.2.1.3 4.2.1.99]	96.45	2.52667	5.16667	1.84333	2.86667	23.3667	24.1167	46.0667	24.4333	25.195
K01684	dgoD; galactonate dehydratase [EC:4.2.1.6]	38.61	1	10.61	2.33333	2.88667	8.72333	10.3333	23.3333	17.28	32.6667
K01685	uxaA; altronate hydrolase [EC:4.2.1.7]	40.5867	4.66667	5.55333	3	11.5333	13.0333	4.53333	11.4	31.88	39.5617
K01686	uxuA; mannonate dehydratase [EC:4.2.1.8]	23.3367	4.52667	7.11	3.17667	10.2	11.81	7.61667	8.06667	11.5467	29.8567
K01687	ilvD; dihydroxy-acid dehydratase [EC:4.2.1.9]	368.75	22.1933	56.0533	38.3433	48.7533	95.7	80.6167	241.567	152.773	243.232
K01689	ENO, eno; enolase [EC:4.2.1.11]	257.39	12.86	28.3867	24.5667	33.7533	67.7	41.6167	157.567	105.66	155.76
K01690	edd; phosphogluconate dehydratase [EC:4.2.1.12]	106.42	2.19333	11.5	3.84333	10.8667	13.0333	29.2833	52.0667	35.49	41.07
K01692	paaF, echA; enoyl-CoA hydratase [EC:4.2.1.17]	387.42	11.3333	39.6667	22.2267	70.86	77.0333	77.3667	234.067	90.1033	237.65
K01693	hisB; imidazoleglycerol-phosphate dehydratase [EC:4.2.1.19]	205.913	9.66667	25.7767	22.0567	27.11	51.5567	34.5	136.167	81.6133	137.542
K01694	TRP; tryptophan synthase [EC:4.2.1.20]	0	0	0	0	0	0	0	0	0	0
K01695	trpA; tryptophan synthase alpha chain [EC:4.2.1.20]	229.473	12.86	26.72	22.2333	32.6433	65.0333	40.95	136.9	100.66	147.315
K01696	trpB; tryptophan synthase beta chain [EC:4.2.1.20]	226.807	12.86	26.72	23.9	32.6433	66.0333	40.95	137.9	96.3267	147.148
K01697	CBS; cystathionine beta-synthase [EC:4.2.1.22]	72.03	6.33333	12.83	6.78	14.6433	16.9767	19.2	50.0667	34.7133	57.6233
K01698	hemB, ALAD; porphobilinogen synthase [EC:4.2.1.24]	236.973	12.86	29.72	22.9	32.6433	68.0333	46.95	144.567	99.4933	152.682
K01699	pduC; propanediol dehydratase large subunit [EC:4.2.1.28]	0	0	0	0	0	0	0	0	0	0
K01702	LEU1; 3-isopropylmalate dehydratase [EC:4.2.1.33]	0	0	0	0	0	0.333333	0	0	0	0
K01703	leuC, IPMI-L; 3-isopropylmalate/(R)-2-methylmalate dehydratase large subunit [EC:4.2.1.33 4.2.1.35]	241.307	12.86	27.3867	24.5667	33.9767	69.3667	41.6167	152.567	114.437	162.065
K01704	leuD, IPMI-S; 3-isopropylmalate/(R)-2-methylmalate dehydratase small subunit [EC:4.2.1.33 4.2.1.35]	241.307	12.86	27.3867	24.5667	33.31	69.3667	40.95	151.9	103.77	161.065
K01705	LYS4; homoaconitate hydratase [EC:4.2.1.36]	0	0	0	0	0.666667	0	0	0	0	0
K01706	gudD; glucarate dehydratase [EC:4.2.1.40]	19.8667	0	3.66667	1.33333	1.31	4.7	12.5333	39.0667	15.9333	15.0667
K01707	kdgD; 5-dehydro-4-deoxyglucarate dehydratase [EC:4.2.1.41]	18	0	4	0.666667	0.22	5.33333	7.33333	24.6667	6.66667	13.6667
K01708	garD; galactarate dehydratase [EC:4.2.1.42]	15.3933	0	2	0.666667	1.2	4.03333	9.86667	17.4	10.49	9.94167
K01709	rfbG; CDP-glucose 4,6-dehydratase [EC:4.2.1.45]	34	1.33333	6.33333	5.55667	1	4.33333	14.3333	47	18.3333	21.555
K01710	E4.2.1.46, rfbB, rffG; dTDP-glucose 4,6-dehydratase [EC:4.2.1.46]	302.22	11.5267	30.7167	24.2333	36.7533	74.31	47.6167	210.9	126.383	178.455
K01711	gmd, GMDS; GDPmannose 4,6-dehydratase [EC:4.2.1.47]	132.8	6.52667	15.5533	6.17667	26.3333	26.8333	24.4167	67	61.8933	83.8317
K01712	hutU, UROC1; urocanate hydratase [EC:4.2.1.49]	134.753	9.52667	19.2767	16.9	22.31	40.4767	31.1167	76.4	65.5467	100.89
K01713	pheC; cyclohexadienyl dehydratase [EC:4.2.1.51 4.2.1.91]	22.1167	1.52667	1.66667	1.84333	0.2	12.5333	6.78333	16.0667	14.6	13.2783
K01714	dapA; 4-hydroxy-tetrahydrodipicolinate synthase [EC:4.3.3.7]	421.813	32.3867	67.94	47.41	62.15	126.213	103.267	248.367	177.477	326.965
K01715	crt; enoyl-CoA hydratase [EC:4.2.1.17]	89.2767	4.33333	10.2767	9.44667	10.6667	20.2767	7.66667	25.6667	25.89	61.2783
K01716	fabA; 3-hydroxyacyl-[acyl-carrier protein] dehydratase / trans-2-decenoyl-[acyl-carrier protein] isomerase [EC:4.2.1.59 5.3.3.14]	78.31	4.86	6.83333	3.51	6.53333	17.7	19.45	22.4	20.1567	16.9867
K01719	hemD, UROS; uroporphyrinogen-III synthase [EC:4.2.1.75]	142.057	13.1933	22.3867	12.8433	26.31	43.5867	32.95	66.4	63.2133	102.038
K01720	prpD; 2-methylcitrate dehydratase [EC:4.2.1.79]	79.61	3	2.77667	2.16667	6.66667	20.2233	15	18.6667	22.2233	20.9167
K01721	nthA; nitrile hydratase subunit alpha [EC:4.2.1.84]	30.3333	4	6	3.33333	8	6.66667	2	0	11	29.8333
K01724	PCBD, phhB; 4a-hydroxytetrahydrobiopterin dehydratase [EC:4.2.1.96]	208.33	10.5267	22.72	15.4	26.4433	51	34.4167	109	62.5033	104.088
K01725	cynS; cyanate lyase [EC:4.2.1.104]	48	1	0.333333	0	3	4.16667	5.66667	20.6667	4.66667	11.3333
K01727	hysA, hylA, hylB; hyaluronate lyase [EC:4.2.2.1]	2.33333	0	0	0	0.11	1	0.666667	2	1.33333	3
K01728	pel; pectate lyase [EC:4.2.2.2]	4.66667	0	0	1.66667	0.11	1.66667	2.16667	21.3333	0	5.83333
K01729	algL; poly(beta-D-mannuronate) lyase [EC:4.2.2.3]	54	0	3.66667	0.666667	0	2.33333	17	22.6667	14.6667	8.33333
K01730	ogl; oligogalacturonide lyase [EC:4.2.2.6]	0.916667	0.193333	0	0.176667	0	0	0.25	0.666667	0	0.045
K01733	thrC; threonine synthase [EC:4.2.3.1]	313.86	13.5267	39.94	33.9	42.7533	82.8133	55.1167	262.233	143.44	214.482
K01734	mgsA; methylglyoxal synthase [EC:4.2.3.3]	69.2533	8.19333	11.11	11.8433	12.2	27.1433	14.45	42.9	34.0467	54.5983
K01735	aroB; 3-dehydroquinate synthase [EC:4.2.3.4]	230.723	13.1933	30.1633	23.3433	31.31	71.7567	47.2833	127.567	108.883	157.26
K01736	aroC; chorismate synthase [EC:4.2.3.5]	236.723	12.86	28.3867	24.5667	31.6433	67.0333	41.6167	152.233	105.66	154.648
K01737	queD, ptpS, PTS; 6-pyruvoyltetrahydropterin/6-carboxytetrahydropterin synthase [EC:4.2.3.12 4.1.2.50]	177.36	8.19333	27.6067	16.7333	19.2	47.8667	42.1167	118.233	105.107	124.51
K01738	cysK; cysteine synthase A [EC:2.5.1.47]	305.617	20.3867	40.4433	35.1333	44.95	91.4567	60.4	186.967	106.87	199.995
K01739	metB; cystathionine gamma-synthase [EC:2.5.1.48]	106.893	9.52667	13.9433	12.79	25.31	41.2567	16.7833	62.7333	31.1567	92.4183
K01740	metY; O-acetylhomoserine (thiol)-lyase [EC:2.5.1.49]	185.553	17.5267	22.7767	24.6767	24.6667	59.7767	45.25	124.167	92.9467	139.215
K01744	aspA; aspartate ammonia-lyase [EC:4.3.1.1]	66.1433	5.19333	3	4.34333	3.31	20.7	16.1167	45.2333	27.7133	33.1617
K01745	hutH, HAL; histidine ammonia-lyase [EC:4.3.1.3]	194.03	13.3867	26.72	22.0767	26.42	59.92	46.3667	127.733	88.27	132.838
K01746	E4.3.1.4; formiminotetrahydrofolate cyclodeaminase [EC:4.3.1.4]	0	0	0	0	0	0	0	0	0	0.666667
K01749	hemC, HMBS; hydroxymethylbilane synthase [EC:2.5.1.61]	229.14	12.1933	25.72	21.2333	34.0867	66.5333	42.2833	137.233	86.3267	148.098
K01750	E4.3.1.12, ocd; ornithine cyclodeaminase [EC:4.3.1.12]	107.503	12	16.3333	11.3333	17.53	25.2	23.5333	37.0667	22.6567	85.7467
K01751	E4.3.1.15; diaminopropionate ammonia-lyase [EC:4.3.1.15]	18.3333	1.33333	0	1.33333	2.33333	2.83333	2.33333	0	3.33333	14.5
K01752	E4.3.1.17, sdaA, sdaB, tdcG; L-serine dehydratase [EC:4.3.1.17]	173.563	14.0533	21.61	23.7433	16.8433	59.6767	50.2333	99.1333	109.317	122.955
K01753	dsdA; D-serine dehydratase [EC:4.3.1.18]	27.2267	3.86	6.33333	7.84333	2.53333	13.7	12.1167	28.7333	19.6	36.1117
K01754	E4.3.1.19, ilvA, tdcB; threonine dehydratase [EC:4.3.1.19]	404.393	27.1933	56.44	36.9	59.3967	101.067	76.9833	200.967	159.817	275.355
K01755	argH, ASL; argininosuccinate lyase [EC:4.3.2.1]	250.473	16.6667	36.3867	28.0567	42.31	65.0333	43.3667	157.9	105.993	175.562
K01756	purB, ADSL; adenylosuccinate lyase [EC:4.3.2.2]	241.39	12.86	28.3867	24.5667	32.6433	67.0333	41.6167	152.567	105.66	156.982
K01758	CTH; cystathionine gamma-lyase [EC:4.4.1.1]	60.2267	4.33333	13.61	7.89	6.64333	14.7567	25.5333	56.4	25.1567	41.4417
K01759	GLO1, gloA; lactoylglutathione lyase [EC:4.4.1.5]	242.73	17.44	27.5	22.2633	26.4	88.2333	40.9	86.4667	88.2067	138.647
K01760	metC; cystathionine beta-lyase [EC:4.4.1.8]	62.64	9.19333	14.5533	11.8433	16.8667	36.7533	17.95	32.0667	37.5467	68.6267
K01761	E4.4.1.11; methionine-gamma-lyase [EC:4.4.1.11]	41.1367	3	8.77667	7.66667	12.4433	11.9433	5.33333	21.6667	20.2233	42.8483
K01762	ACS; 1-aminocyclopropane-1-carboxylate synthase [EC:4.4.1.14]	0	0	0	0	0	0	0	0	0	0
K01766	csdA; cysteine sulfinate desulfinase [EC:4.4.1.-]	23.7833	1.52667	2	1.84333	0.866667	13.0333	12.45	17.4	10.2667	6.945
K01768	E4.6.1.1; adenylate cyclase [EC:4.6.1.1]	189.773	17.3333	39.4967	23.4467	46.4433	48.0567	34	105.333	41.2267	162.333
K01770	ispF; 2-C-methyl-D-erythritol 2,4-cyclodiphosphate synthase [EC:4.6.1.12]	181.643	8.52667	16.61	19.3433	22.31	55.9233	36.7833	128.567	72.88	122.078
K01771	plc; 1-phosphatidylinositol phosphodiesterase [EC:4.6.1.13]	3	0	0.333333	0	0	1.66667	1.33333	6.33333	0.333333	1.33333
K01772	hemH, FECH; protoporphyrin/coproporphyrin ferrochelatase [EC:4.99.1.1 4.99.1.9]	193.973	12.86	20.72	15.5667	28.6433	48.7	41.6167	104.733	72.9367	122.182
K01775	alr; alanine racemase [EC:5.1.1.1]	268.647	15.58	33.2767	29.5867	35.51	80.1767	57.9833	191.633	117.37	178.722
K01776	murI; glutamate racemase [EC:5.1.1.3]	194.363	11.86	25.7767	22.9	28.9767	56.4767	35.2833	140.9	98.1033	132.273
K01777	prdF; proline racemase [EC:5.1.1.4]	4.66667	0	1	0	0.11	1	0	0	0	4
K01778	dapF; diaminopimelate epimerase [EC:5.1.1.7]	224.14	12.86	24.0533	21.9	31.31	64.8667	46.95	142.9	101.493	145.732
K01779	racD; aspartate racemase [EC:5.1.1.13]	101.783	6.66667	18.8333	10	15.8667	37.7	30.8667	75.7333	48.7667	78.6083
K01781	mdlA; mandelate racemase [EC:5.1.2.2]	5.33333	0	0	0	0	0	0	0	0	1.66667
K01782	fadJ; 3-hydroxyacyl-CoA dehydrogenase / enoyl-CoA hydratase / 3-hydroxybutyryl-CoA epimerase [EC:1.1.1.35 4.2.1.17 5.1.2.3]	96.0867	5.19333	8.61	3.73333	13.6433	25.7567	24.1167	33.4	20.38	33.6533
K01783	rpe, RPE; ribulose-phosphate 3-epimerase [EC:5.1.3.1]	236.723	12.86	28.3867	24.5667	32.6433	67.0333	41.6167	152.233	105.66	160.982
K01784	galE, GALE; UDP-glucose 4-epimerase [EC:5.1.3.2]	494.663	27.0533	66.05	56.25	75.9733	144.87	75.2	337.733	195.333	356.985
K01785	galM, GALM; aldose 1-epimerase [EC:5.1.3.3]	119.553	9.52667	22.94	13.51	24.53	48.8667	31.45	80.7333	73.16	111.06
K01787	RENBP; N-acylglucosamine 2-epimerase [EC:5.1.3.8]	1	0	0	0	0	0	0	5.66667	6	0.833333
K01788	nanE; N-acylglucosamine-6-phosphate 2-epimerase [EC:5.1.3.9]	29	3	4	1.66667	3	6.16667	2.66667	24.6667	6.33333	20.1667
K01790	rfbC, rmlC; dTDP-4-dehydrorhamnose 3,5-epimerase [EC:5.1.3.13]	203.19	10.3333	24.72	17.8333	24.5533	55.6667	40	140.667	96.8367	130.8
K01791	wecB; UDP-N-acetylglucosamine 2-epimerase (non-hydrolysing) [EC:5.1.3.14]	191.503	8	18.22	19.2233	16.31	49.7	38.3667	143.233	73.88	121.195
K01792	E5.1.3.15; glucose-6-phosphate 1-epimerase [EC:5.1.3.15]	111.783	3.86	7.16667	4.84333	2.86667	21.0333	29.1167	54.4	28.9333	30.195
K01795	algG; mannuronan 5-epimerase [EC:5.1.3.37]	22.6667	0	3.66667	0.666667	0	2.33333	9.66667	12.6667	8	7
K01796	E5.1.99.4, AMACR, mcr; alpha-methylacyl-CoA racemase [EC:5.1.99.4]	32.3333	0	4	1.66667	9.44333	13.3333	9.83333	29.6667	5.33333	24.3333
K01799	nicE, maiA; maleate isomerase [EC:5.2.1.1]	13.3333	0	0	0	0.11	0	4.66667	15.6667	3	8.33333
K01800	maiA, GSTZ1; maleylacetoacetate isomerase [EC:5.2.1.2]	61.25	4.86	12.8333	6.51	5.66667	22.6667	24.4167	41.6667	22.6667	28.6283
K01801	nagL; maleylpyruvate isomerase [EC:5.2.1.4]	31.6667	6	11	5.89	8.33333	21.1667	10.6667	25.3333	16.3333	34
K01802	E5.2.1.8; peptidylprolyl isomerase [EC:5.2.1.8]	215.297	13.5267	33.9933	21.0667	31.8867	62.72	60.9167	185	85.4467	129.908
K01803	TPI, tpiA; triosephosphate isomerase (TIM) [EC:5.3.1.1]	239.137	12.86	28.3867	24.5667	32.6433	67.0333	42.6167	152.233	107.44	156.157
K01804	araA; L-arabinose isomerase [EC:5.3.1.4]	11.2267	0.526667	0.443333	1.84333	2.53333	1.47667	2.78333	15.4	6.15667	9.52333
K01805	xylA; xylose isomerase [EC:5.3.1.5]	35.17	1.66667	7.27667	3	8.97667	12.2567	12.3667	28.4	21.6033	35.22
K01807	rpiA; ribose 5-phosphate isomerase A [EC:5.3.1.6]	149.53	8.19333	14.61	11.4	14.2	38.2567	31.95	86.7333	42.88	67.7367
K01808	rpiB; ribose 5-phosphate isomerase B [EC:5.3.1.6]	118.307	5.66667	18.5533	17.8333	23.42	43.0333	15.3667	88.2333	61.7167	114.908
K01809	manA, MPI; mannose-6-phosphate isomerase [EC:5.3.1.8]	89.1967	4.91333	8.22	9.03	15.31	33.8667	21.7833	64.7333	51.2133	75.8633
K01810	GPI, pgi; glucose-6-phosphate isomerase [EC:5.3.1.9]	216.28	11.5267	27.3867	20.5667	27.42	63.5333	41.6167	124.567	100.66	143.12
K01811	xylS, yicI; alpha-D-xyloside xylohydrolase [EC:3.2.1.177]	16.6667	0	1.16667	3.55667	2.77667	2.83333	1	5.66667	9.89	13.5167
K01812	uxaC; glucuronate isomerase [EC:5.3.1.12]	29.89	4.86	5.88667	6.51	13.2	15.0333	7.95	13.4	16.66	34.7733
K01813	rhaA; L-rhamnose isomerase [EC:5.3.1.14]	3	0	0	0	0	1.83333	1.66667	6	5.16667	2.07833
K01814	hisA; phosphoribosylformimino-5-aminoimidazole carboxamide ribotide isomerase [EC:5.3.1.16]	235.417	13.1933	27.1633	22.9	27.2	67.2567	42.6167	132.9	111.883	138.398
K01815	kduI; 4-deoxy-L-threo-5-hexosulose-uronate ketol-isomerase [EC:5.3.1.17]	5.83333	2	3.5	1.33333	5	4.83333	0.5	5.66667	6.05667	12.7167
K01816	hyi, gip; hydroxypyruvate isomerase [EC:5.3.1.22]	170.863	8	20.8867	9	11.9767	35.5333	55.2	93.0667	67.16	88.2617
K01817	trpF; phosphoribosylanthranilate isomerase [EC:5.3.1.24]	245.773	14	32.72	24.7233	30.11	59.8333	47.5	171.833	111.95	156.87
K01818	fucI; L-fucose/D-arabinose isomerase [EC:5.3.1.25 5.3.1.3]	2.33333	0	0	0	0	1.16667	0	1.66667	5.33333	5
K01819	E5.3.1.26, lacA, lacB; galactose-6-phosphate isomerase [EC:5.3.1.26]	2.66667	0	0	0	0	0	0	2	0	0
K01820	rhaA; L-rhamnose isomerase / sugar isomerase [EC:5.3.1.14 5.3.1.-]	5.41667	0	3.33333	0	6.44333	0.666667	0.666667	10	1.22333	13.2083
K01821	praC, xylH; 4-oxalocrotonate tautomerase [EC:5.3.2.6]	98.8667	4.33333	13.6667	10.6667	6.31	23.2	26.0333	79.9	52.1	66.6783
K01822	E5.3.3.1; steroid Delta-isomerase [EC:5.3.3.1]	7	0	0	0	2	0	1	1	0	2.5
K01823	idi, IDI; isopentenyl-diphosphate Delta-isomerase [EC:5.3.3.2]	53.0267	5.19333	5.44333	7.4	9.44333	21.2767	3.58333	39	25.89	48.4067
K01825	fadB; 3-hydroxyacyl-CoA dehydrogenase / enoyl-CoA hydratase / 3-hydroxybutyryl-CoA epimerase / enoyl-CoA isomerase [EC:1.1.1.35 4.2.1.17 5.1.2.3 5.3.3.8]	46.1167	1.52667	2	1.84333	1.86667	14.7	14.1167	17.4	13.9333	8.39
K01826	hpaF, hpcD; 5-carboxymethyl-2-hydroxymuconate isomerase [EC:5.3.3.10]	35.2267	1.52667	4	2.51	0.976667	18.0333	17.45	30.0667	16.8233	22.445
K01829	E5.3.4.1; protein disulfide-isomerase [EC:5.3.4.1]	16.6667	0	0	0	0	0	3.66667	5	4	2.5
K01834	PGAM, gpmA; 2,3-bisphosphoglycerate-dependent phosphoglycerate mutase [EC:5.4.2.11]	102.727	8.66667	14.8333	13.1667	18.31	26.2	21.0333	94.4	44.2133	84.1367
K01835	pgm; phosphoglucomutase [EC:5.4.2.2]	101.28	11.1933	17.11	18.9	17.31	46.9233	28.45	80.0667	67.8267	103.703
K01838	pgmB; beta-phosphoglucomutase [EC:5.4.2.6]	13.7767	1.66667	7.77667	3	1	5.27667	10.3333	24	14.2233	21.2783
K01839	deoB; phosphopentomutase [EC:5.4.2.7]	59.6167	7.86	14	13.51	12.8667	33.3667	15.45	48.9	23.9333	57.445
K01840	manB; phosphomannomutase [EC:5.4.2.8]	125.327	10.0533	13.33	11.7433	31.5533	48.89	12.6667	61.6667	42.1733	98.71
K01841	pepM; phosphoenolpyruvate phosphomutase [EC:5.4.2.9]	9.5	0	0	0.223333	0	0	0	0	6.33333	5.33333
K01843	kamA; lysine 2,3-aminomutase [EC:5.4.3.2]	40.61	2.66667	6.66667	5.11333	7.66667	8	0	31.5	12.3333	41.1383
K01844	kamD; beta-lysine 5,6-aminomutase alpha subunit [EC:5.4.3.3]	9.66667	0	1	1.89	1.66667	2.66667	0	5.33333	0	10.3333
K01845	hemL; glutamate-1-semialdehyde 2,1-aminomutase [EC:5.4.3.8]	275	12.86	30.1633	29.2333	34.0867	78.2567	47.1167	157.567	110.107	181.223
K01846	glmS, mutS, mamA; methylaspartate mutase sigma subunit [EC:5.4.99.1]	0.25	0	0	0	0	0	0	0	1	0.333333
K01847	MUT; methylmalonyl-CoA mutase [EC:5.4.99.2]	81.08	10.6667	15.8867	12.89	33.22	33.3867	10.3333	18	52.4467	99.5433
K01848	E5.4.99.2A, mcmA1; methylmalonyl-CoA mutase, N-terminal domain [EC:5.4.99.2]	96	0.666667	13.3333	12.6667	12.8867	20.8333	3.33333	73.8333	20.0567	54.9167
K01849	E5.4.99.2B, mcmA2; methylmalonyl-CoA mutase, C-terminal domain [EC:5.4.99.2]	72.6667	0.666667	9.33333	8.66667	9.44333	13.5	1.66667	55.1667	17.7233	37.0833
K01851	pchA; salicylate biosynthesis isochorismate synthase [EC:5.4.4.2]	9.66667	0	0	1	0	0	0	11.3333	0	2.16667
K01852	LSS, ERG7; lanosterol synthase [EC:5.4.99.7]	0	0	0	0	0	0	0	0	0	0.943333
K01854	glf; UDP-galactopyranose mutase [EC:5.4.99.9]	24.2767	3.33333	6.33333	2.16667	17.6667	10	2	6.66667	5.33333	33.105
K01856	catB; muconate cycloisomerase [EC:5.5.1.1]	48.9433	1.66667	7.44333	3.66667	1	9.22333	20	37	25.2233	21.75
K01857	pcaB; 3-carboxy-cis,cis-muconate cycloisomerase [EC:5.5.1.2]	64.86	3.33333	5.33333	4	7.44333	11.6667	15	24.3333	24.89	36.375
K01858	INO1, ISYNA1; myo-inositol-1-phosphate synthase [EC:5.5.1.4]	73.9167	3.33333	14	11.1133	17.5533	20.1667	2.66667	65.3333	22.5567	57.9383
K01865	hab; (hydroxyamino)benzene mutase [EC:5.4.4.1]	0	0	0	0	0.666667	0	0	0	0	0
K01866	YARS, tyrS; tyrosyl-tRNA synthetase [EC:6.1.1.1]	242.64	16.3867	32.0533	27.41	35.6433	79.3667	41.8667	152.233	106.66	165.193
K01867	WARS, trpS; tryptophanyl-tRNA synthetase [EC:6.1.1.2]	244.173	13.0533	30.0533	26.41	32.9533	67.2333	46.0667	166.967	107.927	163.76
K01868	TARS, thrS; threonyl-tRNA synthetase [EC:6.1.1.3]	245.057	13.1933	28.72	26.5667	32.7533	70.0333	43.6167	154.567	108.327	161.648
K01869	LARS, leuS; leucyl-tRNA synthetase [EC:6.1.1.4]	241.39	12.86	28.3867	24.5667	32.6433	67.0333	41.6167	148.233	105.66	156.982
K01870	IARS, ileS; isoleucyl-tRNA synthetase [EC:6.1.1.5]	236.723	12.86	28.3867	24.5667	32.6433	68.3667	42.1167	152.233	105.66	157.648
K01872	AARS, alaS; alanyl-tRNA synthetase [EC:6.1.1.7]	249.473	16.72	33.0533	31.0767	35.6433	86.7	43.5333	154.233	111.327	180.748
K01873	VARS, valS; valyl-tRNA synthetase [EC:6.1.1.9]	243.723	12.86	28.3867	26.2333	32.6433	67.0333	42.1167	157.567	105.66	159.148
K01874	MARS, metG; methionyl-tRNA synthetase [EC:6.1.1.10]	245.39	14.5267	28.3867	26.2333	35.0867	71.0333	41.6167	157.567	108.993	165.815
K01875	SARS, serS; seryl-tRNA synthetase [EC:6.1.1.11]	237.39	12.86	28.3867	24.5667	32.6433	67.0333	41.6167	152.233	105.66	157.315
K01876	aspS; aspartyl-tRNA synthetase [EC:6.1.1.12]	236.833	12.86	28.3867	24.5667	32.6433	67.0333	43.2833	152.233	112.493	155.982
K01878	glyQ; glycyl-tRNA synthetase alpha chain [EC:6.1.1.14]	150.477	7.86	15.8333	9.73333	14.8667	32.2	37.6167	80.5667	48.7133	71.1533
K01879	glyS; glycyl-tRNA synthetase beta chain [EC:6.1.1.14]	153.587	7.86	15.8333	9.73333	14.8667	33.2	37.6167	86.2333	49.88	70.82
K01880	GARS, glyS1; glycyl-tRNA synthetase [EC:6.1.1.14]	76.47	5	11.8867	14.1667	17.7767	34.8333	4	56.3333	51.9467	79.6617
K01881	PARS, proS; prolyl-tRNA synthetase [EC:6.1.1.15]	249.057	13.1933	29.0533	27.2333	32.6433	68.5333	42.2833	178.567	114.16	162.315
K01883	CARS, cysS; cysteinyl-tRNA synthetase [EC:6.1.1.16]	248.057	14.1933	33.0533	27.79	32.6433	70.7	50.95	176.233	114.327	166.315
K01884	cysS1; cysteinyl-tRNA synthetase, unknown class [EC:6.1.1.16]	4	0	0	0	0	0	0	0	1.22333	3.5
K01885	EARS, gltX; glutamyl-tRNA synthetase [EC:6.1.1.17]	275.303	15.5267	32.83	22.29	39.9767	71.59	47.45	148.067	110.44	171.69
K01886	QARS, glnS; glutaminyl-tRNA synthetase [EC:6.1.1.18]	114.81	3.86	13.61	7.4	9.2	32.31	32.7833	60.9	64.38	70.69
K01887	RARS, argS; arginyl-tRNA synthetase [EC:6.1.1.19]	249.723	15.1933	29.3867	30.9	35.0867	74.0333	42.2833	157.567	107.993	172.982
K01889	FARSA, pheS; phenylalanyl-tRNA synthetase alpha chain [EC:6.1.1.20]	236.057	12.86	28.3867	24.5667	32.6433	67.0333	41.6167	148.233	105.66	154.815
K01890	FARSB, pheT; phenylalanyl-tRNA synthetase beta chain [EC:6.1.1.20]	236.723	12.86	28.3867	24.5667	32.6433	67.0333	42.1167	148.233	105.66	155.315
K01892	HARS, hisS; histidyl-tRNA synthetase [EC:6.1.1.21]	253.223	14.1933	30.3867	26.9	36.31	70.5333	41.6167	157.9	107.827	168.843
K01893	NARS, asnS; asparaginyl-tRNA synthetase [EC:6.1.1.22]	78.7533	6.19333	8.05333	9.73333	11.2	30.5333	17.1167	43.5667	43.2133	61.69
K01894	gluQ; glutamyl-Q tRNA(Asp) synthetase [EC:6.1.1.-]	112.087	6.86	12.5	6.51	10.2	26.5333	29.7833	47.4	37.49	46.82
K01895	ACSS, acs; acetyl-CoA synthetase [EC:6.2.1.1]	422.167	21.1933	40.72	35.6233	57.42	103.2	70.1167	207.233	153.493	257.552
K01896	ACSM; medium-chain acyl-CoA synthetase [EC:6.2.1.2]	1.66667	0	0	0	0	1	0	0	0	0.666667
K01897	ACSL, fadD; long-chain acyl-CoA synthetase [EC:6.2.1.3]	567.037	35.7733	71.2767	75.8233	97.1667	180.01	95.4	390.3	221.317	441.533
K01902	sucD; succinyl-CoA synthetase alpha subunit [EC:6.2.1.5]	214.28	11.86	27.3867	22.4	34.0867	65.8667	38.95	127.567	98.27	144.348
K01903	sucC; succinyl-CoA synthetase beta subunit [EC:6.2.1.5]	211.113	11.86	27.3867	22.4	32.7533	65.7	38.95	127.567	98.27	142.432
K01904	4CL; 4-coumarate--CoA ligase [EC:6.2.1.12]	0	0	0	0	0	0	0	0	0	0
K01905	acdA; acetate---CoA ligase (ADP-forming) subunit alpha [EC:6.2.1.13]	0	0	0	0	0	0	0	0	0	0.333333
K01906	bioW; 6-carboxyhexanoate--CoA ligase [EC:6.2.1.14]	2.33333	0	0	0	0	1	0	2	2	3
K01907	AACS, acsA; acetoacetyl-CoA synthetase [EC:6.2.1.16]	93.6933	1.72	3.33333	5.35333	8.55333	23.8333	14.1667	41.3333	18.28	36.715
K01908	prpE; propionyl-CoA synthetase [EC:6.2.1.17]	87.4433	6.19333	8.16667	4.84333	8.33333	12.6667	17.5833	36.3333	26.2233	38.5867
K01909	mbtM; long-chain-fatty-acid--[acyl-carrier-protein] ligase [EC:6.2.1.20]	0	0	0	0	1	0	1	0	0	0.721667
K01910	citC; [citrate (pro-3S)-lyase] ligase [EC:6.2.1.22]	0.866667	0	0	0	0.2	0.366667	2.53333	4.73333	4.49	1.73333
K01911	menE; O-succinylbenzoic acid---CoA ligase [EC:6.2.1.26]	76.6433	6.52667	6.11	8.23333	15.8667	32.31	7.11667	62.4	34.3233	59.8567
K01912	paaK; phenylacetate-CoA ligase [EC:6.2.1.30]	184.447	12.5267	31.9967	19.18	22.0867	44.31	53.7833	166.067	83.5467	127.278
K01914	asnA; aspartate--ammonia ligase [EC:6.3.1.1]	3.7	1.33333	1	1	0.2	11.7	2.53333	5.73333	8.1	6.36667
K01915	glnA, GLUL; glutamine synthetase [EC:6.3.1.2]	662.303	25.5267	63.83	45.9567	76.75	152.09	143.617	376.4	241.553	351.407
K01916	nadE; NAD+ synthase [EC:6.3.1.5]	98.8867	9.86	11.11	10.2333	12.3333	32.2767	20.5833	56.6667	41.0567	64.115
K01918	panC; pantoate--beta-alanine ligase [EC:6.3.2.1]	201.78	9.86	23.3867	22.7333	28.9767	61.3667	37.95	113.233	94.4367	132.232
K01919	gshA; glutamate--cysteine ligase [EC:6.3.2.2]	148.087	9.52667	17.8333	12.4	12.9767	41.8667	40.2833	86.7333	56.49	78.5417
K01920	gshB; glutathione synthase [EC:6.3.2.3]	143.53	10.86	13.61	8.73333	11.8667	50.9767	33.6167	68.0667	40.49	56.4317
K01921	ddl; D-alanine-D-alanine ligase [EC:6.3.2.4]	329.7	15.1933	36.0533	32.1233	43.1767	92.4	51.15	212.633	121.817	211.603
K01922	PPCS, COAB; phosphopantothenate---cysteine ligase (ATP) [EC:6.3.2.51]	0.443333	0.333333	0.443333	0	0	1.22333	0	1	2.22333	0.666667
K01923	purC; phosphoribosylaminoimidazole-succinocarboxamide synthase [EC:6.3.2.6]	231.723	16.5267	30.72	27.2333	38.6433	74.0333	41.6167	136.9	98.66	166.815
K01924	murC; UDP-N-acetylmuramate--alanine ligase [EC:6.3.2.8]	240.223	12.86	29.0533	24.5667	34.31	63.92	40.95	150.567	92.77	158.677
K01925	murD; UDP-N-acetylmuramoylalanine--D-glutamate ligase [EC:6.3.2.9]	234.447	12.5267	27.61	24.5667	31.6433	63.4767	40.45	151.233	103.437	152.732
K01926	rex; redox-sensing transcriptional repressor	74.2767	4	11.4433	14.3333	15.4433	35.39	4.33333	74.1667	33.89	75.5
K01928	murE; UDP-N-acetylmuramoyl-L-alanyl-D-glutamate--2,6-diaminopimelate ligase [EC:6.3.2.13]	236.667	12.86	28.3867	24.5667	34.31	67.0333	43.1167	151.233	106.217	156.593
K01929	murF; UDP-N-acetylmuramoyl-tripeptide--D-alanyl-D-alanine ligase [EC:6.3.2.10]	236.78	12.5267	27.61	24.5667	31.6433	63.4767	39.95	151.233	103.437	154.398
K01933	purM; phosphoribosylformylglycinamidine cyclo-ligase [EC:6.3.3.1]	227.723	12.86	27.72	23.9	32.6433	67.0333	41.6167	136.9	96.3267	153.148
K01934	MTHFS; 5-formyltetrahydrofolate cyclo-ligase [EC:6.3.3.2]	175.223	11.5267	15.3867	16.5667	28.31	54.2	31.2833	67.2333	66.8267	109.565
K01935	bioD; dethiobiotin synthetase [EC:6.3.3.3]	157.84	5.86	13.72	10.5667	9.17667	32.2333	36.15	99.1333	66.9267	72.36
K01937	pyrG, CTPS; CTP synthase [EC:6.3.4.2]	236.723	12.86	27.3867	24.0667	32.6433	66.0333	41.6167	152.233	105.66	152.732
K01938	fhs; formate--tetrahydrofolate ligase [EC:6.3.4.3]	62.3333	5.86	9.66667	12.2333	10	38.6667	3.58333	48.5	37.7233	58.04
K01939	purA, ADSS; adenylosuccinate synthase [EC:6.3.4.4]	243.307	14.3867	28.3867	27.41	32.6433	78.7	41.8667	163.233	106.827	162.027
K01940	argG, ASS1; argininosuccinate synthase [EC:6.3.4.5]	237.973	12.86	28.3867	24.5667	33.9767	67.0333	40.95	152.233	105.66	154.565
K01941	E6.3.4.6; urea carboxylase [EC:6.3.4.6]	18.2	0	2	0.666667	1.2	5.53333	10.2	28.0667	8.6	15.5667
K01945	purD; phosphoribosylamine---glycine ligase [EC:6.3.4.13]	228.723	12.86	27.72	23.9	32.6433	67.0333	41.6167	142.567	97.4933	152.648
K01947	birA-coaX; biotin---[acetyl-CoA-carboxylase] ligase / type III pantothenate kinase [EC:6.3.4.15 2.7.1.33]	1.33333	0	0	0	0	0	0	0	0	0
K01950	E6.3.5.1, NADSYN1, QNS1, nadE; NAD+ synthase (glutamine-hydrolysing) [EC:6.3.5.1]	192.503	5.33333	23.9433	16.89	20.9767	42.7567	40.8667	145.9	81.27	117.7
K01951	guaA, GMPS; GMP synthase (glutamine-hydrolysing) [EC:6.3.5.2]	321.567	19.5267	38.22	29.6233	47.3767	89.7667	58.0167	174.033	129.417	200.032
K01952	purL, PFAS; phosphoribosylformylglycinamidine synthase [EC:6.3.5.3]	451.94	29.5267	56.4967	55.3467	86.1967	139.59	68.1167	286.067	161.83	345.982
K01953	asnB, ASNS; asparagine synthase (glutamine-hydrolysing) [EC:6.3.5.4]	261.25	19.1933	34.44	36.0133	33.8633	76.2	62.6167	186.567	99.66	187.957
K01955	carB, CPA2; carbamoyl-phosphate synthase large subunit [EC:6.3.5.5]	260.723	14.86	30.72	30.5667	34.9767	74.0333	42.7833	170.733	116.16	181.448
K01956	carA, CPA1; carbamoyl-phosphate synthase small subunit [EC:6.3.5.5]	237.39	13.5267	29.3867	28.2333	32.6433	70.0333	42.1167	136.9	105.327	161.815
K01958	PC, pyc; pyruvate carboxylase [EC:6.4.1.1]	32.47	4.66667	5.44333	5.83333	10.11	18.89	6	6.33333	14.67	38.625
K01959	pycA; pyruvate carboxylase subunit A [EC:6.4.1.1]	48	0	2	0.666667	1	2.33333	9.66667	12.6667	8	7.66667
K01960	pycB; pyruvate carboxylase subunit B [EC:6.4.1.1]	47.5833	0	2	0.666667	1	3.66667	9.66667	13.6667	12.8333	13.3
K01961	accC; acetyl-CoA carboxylase, biotin carboxylase subunit [EC:6.4.1.2 6.3.4.14]	237.473	12.5267	29.0533	28.18	25.2	62.8667	44.2833	109.233	88.6033	156.348
K01962	accA; acetyl-CoA carboxylase carboxyl transferase subunit alpha [EC:6.4.1.2 2.1.3.15]	177.64	11.5267	20.0533	16.7333	22.5333	51.0333	39.95	87.5667	70.27	110.932
K01963	accD; acetyl-CoA carboxylase carboxyl transferase subunit beta [EC:6.4.1.2 2.1.3.15]	205.223	11.72	24.3867	20.2433	29.9767	57.2	41.8667	89.2333	77.27	133.06
K01965	PCCA, pccA; propionyl-CoA carboxylase alpha chain [EC:6.4.1.3]	39.47	3.66667	6.11	3.33333	16.11	11.4433	6.66667	16.3333	6.11333	36.9033
K01966	PCCB, pccB; propionyl-CoA carboxylase beta chain [EC:6.4.1.3 2.1.3.15]	86.8033	8	13.7767	12.89	19.7767	24.11	7.66667	41	32.78	84.2367
K01968	E6.4.1.4A; 3-methylcrotonyl-CoA carboxylase alpha subunit [EC:6.4.1.4]	116.61	4.86	12.8333	6.4	15.6667	19.8333	26.75	47.3333	37.0567	62.17
K01969	E6.4.1.4B; 3-methylcrotonyl-CoA carboxylase beta subunit [EC:6.4.1.4]	118.193	7.72	12.8333	7.35333	15.4433	30.5	28.6667	47.3333	38.5567	59.1317
K01971	ligD; bifunctional non-homologous end joining protein LigD [EC:6.5.1.1]	172.36	7	20.9433	14.89	30.5533	32.2767	34.5	114.833	57.67	119.737
K01972	E6.5.1.2, ligA, ligB; DNA ligase (NAD+) [EC:6.5.1.2]	254.59	12.86	30.3867	25.2333	32.9533	69.7333	49.4833	173.967	114.26	163.382
K01974	RTCA, rtcA; RNA 3'-terminal phosphate cyclase (ATP) [EC:6.5.1.4]	16.4433	1.66667	5.77667	3.22333	0	6.22333	9.33333	25	10.89	18.3333
K01975	thpR; RNA 2',3'-cyclic 3'-phosphodiesterase [EC:3.1.4.58]	165.78	8.66667	23.2767	23.7233	27.9767	58.9233	27.8667	108.9	57.88	130.692
K01989	ABC.X4.S; putative ABC transport system substrate-binding protein	40.4433	5.86	6.33333	6.51	6.33333	14	2.58333	1	5.11333	40.92
K01990	ABC-2.A; ABC-2 type transport system ATP-binding protein	1296.38	71.58	165.707	159.373	213.833	421.74	200.983	924.3	544.057	1006.53
K01991	ABC-2.OM, wza; polysaccharide biosynthesis/export protein	199.053	15.3867	28.3833	12.69	25.2	61.4767	48.7	114.067	89.05	117.875
K01992	ABC-2.P; ABC-2 type transport system permease protein	1248.31	69.9667	145.213	147.223	184.9	379.027	215.717	891.267	529.53	896.112
K01993	ABC-2.TX; HlyD family secretion protein	159.98	9.38667	20.2767	12.02	12.7333	45.79	50.7333	109.3	68.8167	77.865
K01994	gerE; LuxR family transcriptional regulator, transcriptional regulator of spore coat protein	6.33333	2.33333	2	5.33333	2.33333	7	0	0	7	16.6667
K01995	livG; branched-chain amino acid transport system ATP-binding protein	574.333	43.1933	83.3333	59.4	100.42	130.367	110.117	354.9	172.44	388.778
K01996	livF; branched-chain amino acid transport system ATP-binding protein	593.97	42.5267	84.3333	60.7333	96.42	125.7	123.117	374.567	192.553	403.042
K01997	livH; branched-chain amino acid transport system permease protein	571.11	43.86	86	59.7333	99.42	119.367	119.45	348.567	185.33	390.667
K01998	livM; branched-chain amino acid transport system permease protein	582.97	42.5267	83	57.4	95.42	118.033	121.117	360.567	187.553	398.458
K01999	livK; branched-chain amino acid transport system substrate-binding protein	756.75	45.86	91	69.8467	108.177	135.233	139.65	405.467	241.88	480.122
K02000	proV; glycine betaine/proline transport system ATP-binding protein [EC:3.6.3.32]	150.42	8.38667	12	11.3533	5.42	46.3667	39.3667	67.0667	49.0467	66.0733
K02001	proW; glycine betaine/proline transport system permease protein	150.753	7.72	11	8.35333	5.31	45.0333	40.7	68.0667	49.38	63.5733
K02002	proX; glycine betaine/proline transport system substrate-binding protein	307.613	14.0533	24.3333	21.6867	15.42	78.0333	90.0333	151.4	111.047	142.615
K02003	ABC.CD.A; putative ABC transport system ATP-binding protein	840.44	42.16	108.32	97.6767	108.833	248.293	158.9	616.8	400.997	601.562
K02004	ABC.CD.P; putative ABC transport system permease protein	886.543	46.8267	109.813	90.5667	120.167	249.013	166.9	624.467	447.283	593.247
K02005	ABC.CD.TX; HlyD family secretion protein	206.743	13.1933	31.8833	17.0133	26.3333	48.11	43.5833	216.833	103.34	142.01
K02006	cbiO; cobalt/nickel transport system ATP-binding protein	79.3867	2	4.11	4	9.44333	12.89	4.33333	82.3333	21.28	47.8333
K02007	cbiM; cobalt/nickel transport system permease protein	62.72	2	4.44333	2.33333	11.4433	5.89	4.33333	71.3333	17.6133	42.1667
K02008	cbiQ; cobalt/nickel transport system permease protein	59.22	2	2.77667	2.33333	5.11	5.89	4.33333	69.6667	17.6133	36.8333
K02009	cbiN; cobalt/nickel transport protein	46.9433	1	1.66667	1.66667	4	4.66667	3.66667	37.8333	5.55667	28.1667
K02010	afuC, fbpC; iron(III) transport system ATP-binding protein [EC:3.6.3.30]	182.153	21.0533	27.6667	23.8533	30.9333	65.2667	56.1	127.867	81.1933	138.457
K02011	afuB, fbpB; iron(III) transport system permease protein	181.43	21.3867	29.7767	23.8533	29.6	73.6567	59.1	116.867	71.86	141.013
K02012	afuA, fbpA; iron(III) transport system substrate-binding protein	214.097	22.0533	30.4433	23.8533	30.6	76.6567	65.7667	121.867	76.4167	157.485
K02013	ABC.FEV.A; iron complex transport system ATP-binding protein [EC:3.6.3.34]	511.253	40.7733	59.61	67.82	83.9467	151.51	103.567	333.467	218.597	408.67
K02014	TC.FEV.OM; iron complex outermembrane recepter protein	854.317	36.4933	108.99	48.84	79.8667	188.19	237.7	487.067	408.447	427.183
K02015	ABC.FEV.P; iron complex transport system permease protein	519.063	54.8267	68.7767	84.6733	78.7	186.543	116.433	348.867	231.753	456.51
K02016	ABC.FEV.S; iron complex transport system substrate-binding protein	553.93	45.1067	71.72	77.71	85.68	172.133	120.967	363.933	247.077	478.025
K02017	modC; molybdate transport system ATP-binding protein [EC:3.6.3.29]	152.92	8.52667	18.9433	9.4	18.6433	35.09	41.2833	80.7333	54.0467	83.07
K02018	modB; molybdate transport system permease protein	216.753	10.5267	24.9433	16.4	21.6433	49.59	44.6167	130.567	82.2133	117.153
K02019	modE; molybdate transport system regulatory protein	60.31	4.33333	7.44333	4.66667	4.97667	23.9767	23.3667	43.4	29.1567	40.2617
K02020	modA; molybdate transport system substrate-binding protein	228.01	10.1933	22.5	15.7333	19.51	51.9	49.15	122.3	75.2567	127.915
K02021	ABC.MR; putative ABC transport system ATP-binding protein	15.8333	2	3	3.33333	4.44333	6.33333	2	13.6667	2	15.8333
K02022	ABC.MR.TX; HlyD family secretion protein	37.7767	12.1933	19.3333	7.84333	15.6667	22	2.58333	0	6.22333	45.0867
K02024	lamB; maltoporin	55.1167	2.86	11	7.06667	2.2	8.36667	25.45	64.7333	25.6	32.1117
K02025	ABC.MS.P; multiple sugar transport system permease protein	308.08	25.3333	44.8333	45.39	52.7667	72.3333	41.3333	282.667	98.67	307.708
K02026	ABC.MS.P1; multiple sugar transport system permease protein	320.497	26.3333	46.8333	46.0567	50.1	76.1667	39.6667	278.333	102.67	320.417
K02027	ABC.MS.S; multiple sugar transport system substrate-binding protein	329.163	29.6667	46.5	48.0567	58.4333	79	40	288.5	108.67	326.028
K02028	ABC.PA.A; polar amino acid transport system ATP-binding protein [EC:3.6.3.21]	300.38	25.86	54.11	37.6767	44.0167	89.69	104.383	233.933	143.35	243.195
K02029	ABC.PA.P; polar amino acid transport system permease protein	461.87	38.2467	76	53.03	55.06	125.733	182.15	336.467	227.04	338.768
K02030	ABC.PA.S; polar amino acid transport system substrate-binding protein	917.497	51.9133	109.777	80.8267	77.6367	176.257	267.283	587.733	319.057	490.502
K02031	ABC.PE.A; peptide/nickel transport system ATP-binding protein	242.253	31.58	49	52.42	60.1733	119.567	42.15	200.3	106.04	272.685
K02032	ABC.PE.A1; peptide/nickel transport system ATP-binding protein	418.303	53.2467	64	68.3633	91.8367	169.9	76.4833	332.133	182.877	418.352
K02033	ABC.PE.P; peptide/nickel transport system permease protein	543.39	52.0533	85	79.2433	118.503	182.4	81.9	359.8	207.707	483.39
K02034	ABC.PE.P1; peptide/nickel transport system permease protein	549.557	52.72	88.6667	83.91	118.837	187.067	81.2333	408.467	221.04	488.723
K02035	ABC.PE.S; peptide/nickel transport system substrate-binding protein	636.01	55.72	78.4433	81.41	135.233	210.19	105.467	432.6	235.187	537.968
K02036	pstB; phosphate transport system ATP-binding protein [EC:3.6.3.27]	278.813	17.0533	25.9433	28.7433	32.8433	89.79	47.4	201.633	102.703	165.682
K02037	pstC; phosphate transport system permease protein	274.813	17.0533	25.9433	27.0767	32.8433	88.79	46.4	200.633	102.703	164.293
K02038	pstA; phosphate transport system permease protein	284.48	17.0533	25.9433	29.7433	32.8433	90.4567	46.4	211.967	102.703	166.682
K02039	phoU; phosphate transport system protein	243.03	13.1933	25.2767	26.5667	33.6433	67.9233	42.2833	155.567	95.5467	154.348
K02040	pstS; phosphate transport system substrate-binding protein	414.757	25.2467	31.4433	35.2533	39.1767	114.79	69.65	289.3	131.76	212.777
K02041	phnC; phosphonate transport system ATP-binding protein [EC:3.6.3.28]	130.617	5.66667	11	6	7.86667	11.7	26.2	57.7333	26.6	45.8583
K02042	phnE; phosphonate transport system permease protein	175.567	10.3333	20	10.6667	11.0667	21.9	52.4	83.4667	41.8667	75.2167
K02043	phnF; GntR family transcriptional regulator, phosphonate transport system regulatory protein	15.3933	2.66667	3	1.66667	3.2	3.03333	5.86667	4.73333	4.15667	11.025
K02044	phnD; phosphonate transport system substrate-binding protein	158.45	9.38667	13.5	8.24333	11.5333	19.0333	34.0333	86.4	39.1567	67.1983
K02045	cysA; sulfate transport system ATP-binding protein [EC:3.6.3.25]	104.17	3.33333	9.27667	7	7.86667	14.7567	27.5333	74.4	33.38	57.775
K02046	cysU; sulfate transport system permease protein	106.363	3.33333	9.27667	7	8.2	15.4233	28.5333	74.4	33.9367	57.65
K02047	cysW; sulfate transport system permease protein	106.03	3.33333	9.27667	7	8.2	15.4233	28.5333	74.4	33.9367	57.65
K02048	cysP, sbp; sulfate transport system substrate-binding protein	149.897	4.66667	15.9433	10.6667	8.4	23.1233	50.0667	115.8	59.2033	84.55
K02049	ABC.SN.A; NitT/TauT family transport system ATP-binding protein	397.92	33	67.7767	46.5567	77.84	102.957	85.5667	276.133	155.15	339.675
K02050	ABC.SN.P; NitT/TauT family transport system permease protein	375.22	30.3333	59.7767	44.2233	70.3067	98.09	90.0333	272.067	142.55	327.692
K02051	ABC.SN.S; NitT/TauT family transport system substrate-binding protein	452.353	33.3333	74.7767	48.89	63.8833	109.057	111.333	339.667	166.727	345.3
K02052	ABC.SP.A; putative spermidine/putrescine transport system ATP-binding protein	230.667	16.3867	36.6667	18.02	27.6433	45.8667	65.3667	136.4	110.77	169.643
K02053	ABC.SP.P; putative spermidine/putrescine transport system permease protein	206.5	13.0533	31.3333	14.6867	21.6433	46.3667	67.3667	137.4	100.993	154.282
K02054	ABC.SP.P1; putative spermidine/putrescine transport system permease protein	190.723	13.0533	32.6667	14.6867	21.6433	36.7	64.0333	130.733	88.9367	134.948
K02055	ABC.SP.S; putative spermidine/putrescine transport system substrate-binding protein	295.917	16.72	37	17.02	27.31	53.0333	84.7	171.733	126.437	176.657
K02056	ABC.SS.A; simple sugar transport system ATP-binding protein [EC:3.6.3.17]	257.507	21.6667	44.6667	40.0567	39.84	69.5667	70.4	267.967	123.87	257.467
K02057	ABC.SS.P; simple sugar transport system permease protein	422.203	39.3333	74.3333	66.28	61.15	106.767	119.267	454.2	215.917	403.033
K02058	ABC.SS.S; simple sugar transport system substrate-binding protein	155.923	12.6667	26.6667	18.5	18.3967	29.4	50.0667	128.133	67.7033	137.092
K02062	thiQ; thiamine transport system ATP-binding protein	21.31	4.19333	5.33333	3.51	8.31	15.3667	7.11667	25.7333	9.15667	21.82
K02063	thiP; thiamine transport system permease protein	17.9767	4.19333	5.33333	3.51	8.31	15.3667	7.11667	25.7333	9.15667	20.1533
K02064	thiB, tbpA; thiamine transport system substrate-binding protein	17.9767	4.19333	5.33333	3.51	8.31	15.3667	7.11667	25.7333	9.15667	20.1533
K02065	mlaF, linL, mkl; phospholipid/cholesterol/gamma-HCH transport system ATP-binding protein	282.693	12.72	27.8867	17.58	27.6433	55.0333	64.5333	136.4	112.273	150.943
K02066	mlaE, linK; phospholipid/cholesterol/gamma-HCH transport system permease protein	351.803	14.3867	37.33	21.58	50.42	77.4233	83.5333	221.4	121.83	203.555
K02067	mlaD, linM; phospholipid/cholesterol/gamma-HCH transport system substrate-binding protein	355.693	12.72	47.5533	19.69	79.4167	80.8667	81.3667	208.067	117.273	228.945
K02068	ABC.X2.A; putative ABC transport system ATP-binding protein	34.7	3.33333	2	5	1.86667	16.0333	2.53333	4.73333	9.26667	14.5667
K02069	ABC.X2.P; putative ABC transport system permease protein	68.95	3.52667	2	5.17667	3.97667	17.0333	8.78333	33.7333	20.6	27.945
K02071	metN; D-methionine transport system ATP-binding protein	167.37	12.5267	16.6667	17.6767	14.1767	43.5667	42.9833	106.967	58.6467	97.595
K02072	metI; D-methionine transport system permease protein	152.703	11.86	17	18.6767	15.1767	45.5667	46.3167	87.3	62.98	96.7617
K02073	metQ; D-methionine transport system substrate-binding protein	203.27	16.3867	27.6667	27.3533	18.5767	59.1333	71.6333	133.433	89.96	137.315
K02074	ABC.ZM.A; zinc/manganese transport system ATP-binding protein	49.81	4.33333	4.66667	2.83333	5.86667	7.2	8.86667	24.0667	17.9333	29.4
K02075	ABC.ZM.P; zinc/manganese transport system permease protein	50.06	4.52667	4.66667	3.01	6.86667	7.2	11.7833	43.7333	20.9333	32.6117
K02076	zurR, zur; Fur family transcriptional regulator, zinc uptake regulator	10.1667	2.33333	2	5.33333	4	7	0	0	7	17.1667
K02077	ABC.ZM.S; zinc/manganese transport system substrate-binding protein	81.8933	4.52667	7.33333	5.34333	9.86667	16.7	11.7833	86.7333	29.6	45.8617
K02078	acpP; acyl carrier protein	384.37	19.2467	44.1067	40.7033	37.15	109.933	86.85	256.7	170.2	250.882
K02079	agaA; N-acetylgalactosamine-6-phosphate deacetylase [EC:3.5.1.25]	0	0	0	0	0	0.166667	0	0	0	0
K02080	agaI; galactosamine-6-phosphate isomerase [EC:5.3.1.-]	0	0	0	0	0	0.166667	0	0	0	0
K02081	agaR; DeoR family transcriptional regulator, aga operon transcriptional repressor	36.61	1.66667	5.11	4.66667	5.44333	4.27667	13.6667	34.6667	19	18.1117
K02082	agaS; tagatose-6-phosphate ketose/aldose isomerase [EC:5.-.-.-]	27.6667	1.33333	4.66667	3	0	3.83333	13	30.3333	15.3333	12
K02083	allC; allantoate deiminase [EC:3.5.3.9]	16.4767	2.66667	5	4.66667	6.2	7.53333	2.53333	4.4	2.26667	23.4
K02086	dnaD; DNA replication protein	7.66667	2.33333	2	5.33333	2.33333	7	0	7.16667	7	16.6667
K02092	apcA; allophycocyanin alpha subunit	21.3333	1	0	0	0	1	2.66667	19.6667	3	4.33333
K02093	apcB; allophycocyanin beta subunit	21.3333	1	0	0	0	1	2.66667	19.6667	3	4.33333
K02094	apcC; phycobilisome core linker protein	21.3333	1	0	0	0	1	2.66667	19.6667	3	4.33333
K02095	apcD; allophycocyanin-B	21.3333	1	0	0	0	1	2.66667	19.6667	3	4.33333
K02096	apcE; phycobilisome core-membrane linker protein	21.3333	1	0	0	0	1	2.66667	19.6667	3	4.33333
K02097	apcF; phycobilisome core component	21.3333	1	0	0	0	1	2.66667	19.6667	3	4.33333
K02099	araC; AraC family transcriptional regulator, arabinose operon regulatory protein	3.11667	0.193333	0	0.176667	0.31	0.366667	2.78333	4.73333	2.26667	4.27833
K02100	araE; MFS transporter, SP family, arabinose:H+ symporter	0	0	0	0	0	0.166667	0	0.333333	0	0
K02101	araL; arabinose operon protein AraL	0	0	0	0	0	0	0	0	0	0
K02103	araR; GntR family transcriptional regulator, arabinose operon transcriptional repressor	1.83333	0	0	0	0	0	0	0	0	0.833333
K02106	atoE; short-chain fatty acids transporter	54.11	1.33333	4.11	4.89	1	7.11	13.3333	17.6667	20	19.6117
K02107	ATPVG, ahaH, atpH; V/A-type H+/Na+-transporting ATPase subunit G/H	0	0	0	0	0	0	0	1	1	0.666667
K02108	ATPF0A, atpB; F-type H+-transporting ATPase subunit a	235.973	12.86	28.3867	24.5667	32.6433	66.7	42.1167	151.233	105.66	152.69
K02109	ATPF0B, atpF; F-type H+-transporting ATPase subunit b	287.193	17.1933	34.3867	26.4567	41.9767	75.0333	50.1167	170.9	113.883	180.773
K02110	ATPF0C, atpE; F-type H+-transporting ATPase subunit c	235.89	12.86	28.3867	24.5667	32.6433	68.0333	42.1167	151.233	105.66	155.26
K02111	ATPF1A, atpA; F-type H+-transporting ATPase subunit alpha [EC:3.6.3.14]	235.223	12.86	28.3867	24.5667	32.6433	66.7	42.6167	151.233	101.993	150.148
K02112	ATPF1B, atpD; F-type H+-transporting ATPase subunit beta [EC:3.6.3.14]	235.223	12.86	28.3867	24.5667	32.6433	66.7	42.1167	151.233	105.66	152.648
K02113	ATPF1D, atpH; F-type H+-transporting ATPase subunit delta	226.223	12.86	27.72	23.9	32.6433	66.7	41.6167	135.9	96.3267	150.148
K02114	ATPF1E, atpC; F-type H+-transporting ATPase subunit epsilon	235.223	12.86	28.3867	24.5667	32.6433	66.7	42.1167	151.233	105.66	152.648
K02115	ATPF1G, atpG; F-type H+-transporting ATPase subunit gamma	235.223	12.86	28.3867	24.5667	32.6433	66.7	42.1167	151.233	101.993	150.148
K02116	atpI; ATP synthase protein I	127.087	11.5267	15.6667	11.8433	15.31	35.2	29.45	67.4	44.1567	77.07
K02117	ATPVA, ntpA, atpA; V/A-type H+/Na+-transporting ATPase subunit A [EC:3.6.3.14 3.6.3.15]	3.66667	0	1	3.33333	0	2.33333	0	1	5	10.8333
K02118	ATPVB, ntpB, atpB; V/A-type H+/Na+-transporting ATPase subunit B	3.66667	0	1	3.33333	0	2.33333	0	1	5	10.8333
K02119	ATPVC, ntpC, atpC; V/A-type H+/Na+-transporting ATPase subunit C	1.66667	0	1	0	0	1.33333	0	1	1	4.5
K02120	ATPVD, ntpD, atpD; V/A-type H+/Na+-transporting ATPase subunit D	3.66667	0	1	1.66667	0	1.33333	0	1	5	9
K02121	ATPVE, ntpE, atpE; V/A-type H+/Na+-transporting ATPase subunit E	1.83333	0	1	1.66667	0	1.33333	0	1	5	7.33333
K02122	ATPVF, ntpF, atpF; V/A-type H+/Na+-transporting ATPase subunit F	2.16667	0	1	0	0	1.33333	0	1	1	5.33333
K02123	ATPVI, ntpI, atpI; V/A-type H+/Na+-transporting ATPase subunit I	3.66667	0	1	3.33333	0	2.33333	0	1	5	10.8333
K02124	ATPVK, ntpK, atpK; V/A-type H+/Na+-transporting ATPase subunit K	3.66667	0	1	3.33333	0	2.33333	0	1	5	10.8333
K02134	ATPeF1D, ATP5D, ATP16; F-type H+-transporting ATPase subunit delta	3	0	0	0	0	0	0	0	0	0
K02137	ATPeF0O, ATP5O, ATP5; F-type H+-transporting ATPase subunit O	4.66667	0	0	0	0	0	0	0	0	1.66667
K02160	accB, bccP; acetyl-CoA carboxylase biotin carboxyl carrier protein	226.473	13.86	28.72	28.29	28.8667	69.5333	40.6167	93.4	81.6033	150.348
K02164	norE; nitric oxide reductase NorE protein	13.86	0	1.66667	0.666667	1	1.33333	5	11.6667	6.55667	5.20833
K02167	betI; TetR/AcrR family transcriptional regulator, transcriptional repressor of bet genes	75.31	0.86	2.33333	0.843333	1.86667	5.03333	21.7833	23.4	19.49	11.82
K02168	betT, betS; choline/glycine/proline betaine transport protein	115.643	2.66667	2.77667	0.666667	2.86667	7.47667	25.2	34.4	22.6	17.845
K02169	bioC; malonyl-CoA O-methyltransferase [EC:2.1.1.197]	92.3367	3.52667	8.5	4.84333	3.2	20.5333	25.45	47.4	36.7667	30.75
K02170	bioH; pimeloyl-[acyl-carrier protein] methyl ester esterase [EC:3.1.1.85]	65.8933	1.52667	3.83333	1.84333	1.86667	15.5333	16.1167	22.4	18.2667	11.3617
K02171	blaI; BlaI family transcriptional regulator, penicillinase repressor	0.666667	0	0	0	0	0	0	0	0	0.333333
K02172	blaR1; bla regulator protein blaR1	1.33333	0	0	0	0	0	0	0	0	0
K02173	yggC; putative kinase	0.25	0.193333	0	0.176667	0	0.166667	0.25	0	0	1.21167
K02182	caiC; carnitine-CoA ligase [EC:6.2.1.48]	10	0	1.66667	0	5	1.5	1.33333	4.66667	0	11.6667
K02183	CALM; calmodulin	0	0	0	0	0	0	0	0	0	0
K02184	FMN2; formin 2	4.66667	0	0	0	0	0	0	0	0	1.66667
K02188	cbiD; cobalt-precorrin-5B (C1)-methyltransferase [EC:2.1.1.195]	62.1367	3.33333	4.66667	3	5	10	9.66667	49.8333	25.6133	36.875
K02189	cbiG; cobalt-precorrin 5A hydrolase [EC:3.7.1.12]	43.36	4.33333	6	4.66667	10.3333	11.3333	8.16667	25.1667	23.5567	34.375
K02190	cbiK; sirohydrochlorin cobaltochelatase [EC:4.99.1.3]	0.666667	0	1	0	0	1	0	0	1.22333	5.66667
K02191	cbiT; cobalt-precorrin-6B (C15)-methyltransferase [EC:2.1.1.196]	22	1	1	0	0	2	2.66667	19.6667	4.22333	7.33333
K02192	bfd; bacterioferritin-associated ferredoxin	123.45	4.52667	9.5	5.51	5.86667	22.8667	25.95	53.7333	34.6	41.195
K02193	ccmA; heme exporter protein A [EC:3.6.3.41]	139.42	5.52667	15.1667	9.4	15.2	26.3667	20.95	70.7333	32.99	52.57
K02194	ccmB; heme exporter protein B	135.087	6.19333	14.5	9.4	15.8667	26.3667	20.45	66.7333	40.2133	51.57
K02195	ccmC; heme exporter protein C	142.087	6.19333	15.8333	9.4	16.5333	27.7	20.95	66.7333	40.2133	53.4033
K02196	ccmD; heme exporter protein D	82.9767	4.86	6.83333	3.51	7.53333	18.7	18.45	22.0667	21.9333	21.1533
K02197	ccmE; cytochrome c-type biogenesis protein CcmE	134.087	6.19333	11.1667	6.73333	16.5333	25.0333	20.95	66.7333	35.88	47.57
K02198	ccmF; cytochrome c-type biogenesis protein CcmF	148.67	7.72	15.8333	10.5767	16.5333	38.0333	22.2	66.7333	40.2133	54.615
K02199	ccmG, dsbE; cytochrome c biogenesis protein CcmG, thiol:disulfide interchange protein DsbE	126.503	5.72	9.16667	5.35333	12.2	22.3667	21.2	69.7333	27.49	38.9483
K02200	ccmH; cytochrome c-type biogenesis protein CcmH	200.807	9.05333	14.3333	8.13333	19.2	31.5333	38.3667	78.4	50.0467	59.99
K02201	E2.7.7.3B; pantetheine-phosphate adenylyltransferase [EC:2.7.7.3]	0	0	0	0	0	0	0	0	0	0.5
K02203	thrH; phosphoserine / homoserine phosphotransferase [EC:3.1.3.3 2.7.1.39]	43.8333	0	2	0.666667	1	2.33333	9.66667	12.6667	11.6667	7.16667
K02204	thrB2; homoserine kinase type II [EC:2.7.1.39]	72.4133	4.33333	12.4433	5.55667	6.66667	13.0567	21.8333	54	33.9467	42.4583
K02205	rocE, rocC; arginine/ornithine permease	3	0	0.333333	0	0	1.66667	1.33333	1	0.333333	1
K02217	ftnA, ftn; ferritin [EC:1.16.3.2]	22.95	2.19333	2.33333	1.84333	2.86667	14.0333	3.45	29.7333	40.7133	21.245
K02221	yggT; YggT family protein	196.087	11.5267	23.3333	21.3433	26.31	56.0333	37.2833	163.9	66.6567	121.403
K02224	cobB-cbiA; cobyrinic acid a,c-diamide synthase [EC:6.3.5.9 6.3.5.11]	127.97	6	9	8	20.11	24.3333	22.5	77.1667	41.8367	90.07
K02225	cobC1, cobC; cobalamin biosynthetic protein CobC	65.83	4.66667	10.6667	5.33333	5.66667	10.6667	22.5	36.6667	25.4467	33.5
K02226	cobC, phpB; alpha-ribazole phosphatase [EC:3.1.3.73]	90.6933	5.86	14.6667	12.8433	9.33333	33.6667	23.4167	48.1667	43.1133	67.04
K02227	cbiB, cobD; adenosylcobinamide-phosphate synthase [EC:6.3.1.10]	151.553	10.86	19.6667	18.8433	19.4433	44.5	41.4167	108.833	64.17	120.503
K02228	cobF; precorrin-6A synthase [EC:2.1.1.152]	33.5	0.666667	3.66667	0.666667	6.77667	7.33333	7.83333	21	9.66667	22.4167
K02229	cobG; precorrin-3B synthase [EC:1.14.13.83]	37.8033	2.66667	6.66667	2.33333	11.3333	9	10.3333	24.3333	15.89	27.625
K02230	cobN; cobaltochelatase CobN [EC:6.6.1.2]	92.72	4.33333	7	2.33333	11.4433	17.3333	19.1667	54.3333	27.9467	55.2917
K02231	cobP, cobU; adenosylcobinamide kinase / adenosylcobinamide-phosphate guanylyltransferase [EC:2.7.1.156 2.7.7.62]	123.553	9.52667	16.3333	12.51	21.11	41.1667	31.0833	84.5	52.8367	93.47
K02232	cobQ, cbiP; adenosylcobyric acid synthase [EC:6.3.5.10]	125.887	9.52667	15	13.51	17.7767	37.6667	31.5833	83.1667	46.8367	95.0033
K02233	E2.7.8.26, cobS, cobV; adenosylcobinamide-GDP ribazoletransferase [EC:2.7.8.26]	143.387	9.52667	16.3333	16.1767	22.4433	45.1667	32.0833	122.5	65.8367	108.137
K02234	cobW; cobalamin biosynthesis protein CobW	57.6367	4.33333	5	2.33333	5.33333	8.66667	11.8333	32.3333	18.78	30.625
K02236	comC; leader peptidase (prepilin peptidase) / N-methyltransferase [EC:3.4.23.43 2.1.1.-]	7	2.33333	2	5.33333	2.33333	7	0	1	7	14.5
K02237	comEA; competence protein ComEA	140.893	5.52667	16.61	14.5667	19.6433	48.9233	20.95	94.5667	53.88	102.612
K02238	comEC; competence protein ComEC	233.03	12.1933	29.3867	24.5667	33.31	67.2	41.6167	151.233	108.327	158.19
K02239	comER; competence protein ComER	3.33333	0	0.666667	0.666667	0	0	0	0	4.66667	5.5
K02240	comFA; competence protein ComFA	7.66667	2.33333	2	5.33333	2.33333	7	0	1	7	14.5
K02241	comFB; competence protein ComFB	4.5	1.66667	0	1.66667	2.33333	4	0	6.16667	3.33333	8.16667
K02242	comFC; competence protein ComFC	5.66667	2.33333	3	4.66667	2.33333	8	0	1	3.33333	17.5
K02243	comGA; competence protein ComGA	4.33333	2.33333	2	4.66667	2.33333	7	0	1	2.33333	14.5
K02244	comGB; competence protein ComGB	4.33333	2.33333	2	4.66667	2.33333	7	0	1	2.33333	14.5
K02245	comGC; competence protein ComGC	4.33333	2.33333	2	4.66667	2.33333	7	0	1	2.33333	14.5
K02246	comGD; competence protein ComGD	1.33333	0.666667	2	3	0	3	0	1	0	7.33333
K02248	comGF; competence protein ComGF	3	2.33333	2	4.66667	2.33333	7	0	1	2.33333	14.5
K02250	comK; competence protein ComK	7.33333	4.66667	4	9.33333	4.66667	14	0	0	4.66667	28
K02251	comQ; competence protein ComQ	3.66667	1.33333	0	1.33333	2.33333	2.66667	0	0	0	6.83333
K02254	comZ; competence protein ComZ	0	0.666667	1	3	0	3	0	0	0	4
K02255	ftnB; ferritin-like protein 2	0	0	0	0	0	0.166667	0	0.333333	0	0
K02258	COX11, ctaG; cytochrome c oxidase assembly protein subunit 11	90.4433	6.19333	11.1667	6.51	9.66667	26.1667	26.75	42.6667	35.2233	43.92
K02259	COX15, ctaA; cytochrome c oxidase assembly protein subunit 15	198.997	12.86	26.0533	19.9	26.11	53	34.4167	122.333	75.0033	116.393
K02262	COX3; cytochrome c oxidase subunit 3	4	0	0	0	0	0	0	0	0	2.5
K02274	coxA, ctaD; cytochrome c oxidase subunit I [EC:1.9.3.1]	264.607	16.5267	31.0533	27.1233	42.9967	73	41.5833	159.667	111.837	166.227
K02275	coxB, ctaC; cytochrome c oxidase subunit II [EC:1.9.3.1]	283.107	20.86	39.83	29.4567	43.11	80.5567	49.0833	178.333	128.727	183.948
K02276	coxC, ctaE; cytochrome c oxidase subunit III [EC:1.9.3.1]	231.94	19.1933	37.1633	25.79	39.4433	72.4433	41.4167	130.333	100.06	151.838
K02277	coxD, ctaF; cytochrome c oxidase subunit IV [EC:1.9.3.1]	32.11	2.66667	5.44333	7.11333	6	14.0567	2.66667	11	15.39	42.945
K02278	cpaA, tadV; prepilin peptidase CpaA [EC:3.4.23.43]	97.1933	8.72	19.7767	12.91	10	36.89	46.3333	89.6667	50.5567	60.965
K02279	cpaB, rcpC; pilus assembly protein CpaB	127.86	10.0533	22.11	15.2433	18.11	51.0567	47	127.833	57.89	79.16
K02280	cpaC, rcpA; pilus assembly protein CpaC	98.1933	10.0533	21.4433	13.91	10	47.2233	46.3333	89.6667	49.5567	61.6317
K02281	cpaD; pilus assembly protein CpaD	8.41667	0	1	0	4.33333	2.66667	1.83333	0	0	3.79167
K02282	cpaE, tadZ; pilus assembly protein CpaE	135.027	8.72	26.11	16.02	16.4433	42.39	47.5	121.667	59.89	80.3817
K02283	cpaF, tadA; pilus assembly protein CpaF	187.693	12.72	32.7767	22.19	32.5533	71.39	48.6667	202.167	80.2233	144.02
K02284	cpcA; phycocyanin alpha chain	21.3333	1	0	0	0	1	2.66667	19.6667	3	4.33333
K02285	cpcB; phycocyanin beta chain	21.3333	1	0	0	0	1	2.66667	19.6667	3	4.33333
K02286	cpcC; phycocyanin-associated rod linker protein	0	0	0	0	0	0	2.66667	19.6667	3	0.333333
K02287	cpcD; phycocyanin-associated, rod	0	0	0	0	0	0	2.66667	19.6667	3	0.333333
K02288	cpcE; phycocyanobilin lyase subunit alpha [EC:4.4.1.32]	21.3333	1	0	0	0	1	2.66667	19.6667	3	4.33333
K02289	cpcF; phycocyanobilin lyase subunit beta [EC:4.4.1.32]	21.3333	1	0	0	0	1	2.66667	19.6667	3	4.33333
K02290	cpcG; phycobilisome rod-core linker protein	42.6667	2	0	0	0	2	5.33333	39.3333	6	8.66667
K02291	crtB; 15-cis-phytoene synthase [EC:2.5.1.32]	160.08	8.66667	18.11	12.6667	20.8867	34.2233	19.8333	108.667	52.28	98.4583
K02292	crtO; beta-carotene ketolase (CrtO type)	0	0	0	0	0	0	0	0	0	0
K02293	PDS, crtP; 15-cis-phytoene desaturase [EC:1.3.5.5]	21.3333	1	0	0	0	1	2.66667	19.6667	3	4.33333
K02294	crtR; beta-carotene hydroxylase [EC:1.14.13.-]	21.3333	1	0	0	0	1	2.66667	19.6667	3	4.33333
K02297	cyoA; cytochrome o ubiquinol oxidase subunit II [EC:1.10.3.10]	68.8367	1.52667	9.83333	3.84333	3.2	10.7	26.2833	51.4	24.49	29.945
K02298	cyoB; cytochrome o ubiquinol oxidase subunit I [EC:1.10.3.10]	68.8367	1.52667	9.83333	3.84333	3.2	10.7	26.2833	51.4	24.49	29.945
K02299	cyoC; cytochrome o ubiquinol oxidase subunit III	77.3367	1.52667	9.83333	3.84333	4.53333	11.5333	26.2833	57.0667	25.6567	32.5283
K02300	cyoD; cytochrome o ubiquinol oxidase subunit IV	70.5033	1.52667	9.83333	3.84333	3.2	10.7	26.2833	57.0667	25.6567	30.7783
K02302	cysG; uroporphyrin-III C-methyltransferase / precorrin-2 dehydrogenase / sirohydrochlorin ferrochelatase [EC:2.1.1.107 1.3.1.76 4.99.1.4]	82.5367	6.66667	9.5	5	15.1767	24.2333	20.5667	33.8	21.7567	46.5083
K02303	cobA; uroporphyrin-III C-methyltransferase [EC:2.1.1.107]	156.887	14.9133	21.7767	18.6967	18.6667	52.4433	41.75	103.667	75.0033	93.7883
K02304	MET8; precorrin-2 dehydrogenase / sirohydrochlorin ferrochelatase [EC:1.3.1.76 4.99.1.4]	45.3033	5.86	5.88667	10.4	10	30.3333	0.25	30.8333	29.5033	50.1567
K02305	norC; nitric oxide reductase subunit C	13.5267	0	1.66667	0.666667	0	1.33333	6	11.6667	6.55667	4.70833
K02313	dnaA; chromosomal replication initiator protein	238.333	13.1933	29.1633	24.5667	33.6433	72.2567	43.2833	151.233	107.883	158.065
K02314	dnaB; replicative DNA helicase [EC:3.6.4.12]	253.833	14.1933	33.3867	27.5667	32.6433	73.2	52.2833	176.567	114.66	167.648
K02315	dnaC; DNA replication protein DnaC	32.1667	0	9.33333	5.33333	2	8.83333	1	27.5	13.8333	26.9167
K02316	dnaG; DNA primase [EC:2.7.7.-]	236.723	12.86	28.3867	24.5667	32.6433	67.0333	41.6167	151.233	105.66	154.482
K02317	dnaT; DNA replication protein DnaT	0	0	0	0	0	0.166667	0	0.333333	0	0
K02318	COASY; phosphopantetheine adenylyltransferase / dephospho-CoA kinase [EC:2.7.7.3 2.7.1.24]	0	0	0	0	0	0	0	0	0	0
K02319	pol; DNA polymerase, archaea type [EC:2.7.7.7]	0	0	0	0	0	0	0	2	0	1
K02322	polC; DNA polymerase II large subunit [EC:2.7.7.7]	0	0	0	0	0	0	0	1	0	0
K02323	polB; DNA polymerase II small subunit [EC:2.7.7.7]	0	0	0	0	0	0	0	1	0	0
K02334	dpo; DNA polymerase bacteriophage-type [EC:2.7.7.7]	210.883	11.3333	30.2767	24.78	28.6667	51.89	40.1667	140.833	75.8367	140.222
K02335	polA; DNA polymerase I [EC:2.7.7.7]	280.39	15.5267	36.3867	29.4567	35.0867	76.0333	55.2833	191.567	120.327	188.982
K02336	polB; DNA polymerase II [EC:2.7.7.7]	43.45	2.86	6.66667	5.51	1.53333	18.0333	21.7833	41.4	25.2667	24.945
K02337	dnaE; DNA polymerase III subunit alpha [EC:2.7.7.7]	238.5	13.86	29.4967	24.5667	36.31	68.1433	41.6167	152.567	109.217	157.427
K02338	dnaN; DNA polymerase III subunit beta [EC:2.7.7.7]	236.723	12.86	28.3867	24.5667	32.6433	67.0333	41.6167	155.9	105.66	154.815
K02339	holC; DNA polymerase III subunit chi [EC:2.7.7.7]	110.42	6.86	12.5	6.51	10.9767	26.5333	29.2833	47.4	37.49	46.82
K02340	holA; DNA polymerase III subunit delta [EC:2.7.7.7]	236.057	12.86	28.3867	24.5667	32.6433	67.0333	41.6167	147.233	104.437	154.482
K02341	holB; DNA polymerase III subunit delta' [EC:2.7.7.7]	234.557	12.86	28.3867	21.2333	32.6433	66.0333	41.6167	151.233	104.437	152.482
K02342	dnaQ; DNA polymerase III subunit epsilon [EC:2.7.7.7]	362.137	27.4933	39.2733	32.34	49.3067	111.973	71.0333	186.067	171.383	196.605
K02343	dnaX; DNA polymerase III subunit gamma/tau [EC:2.7.7.7]	241.89	12.86	28.3867	25.2333	32.6433	67.0333	41.6167	151.233	105.66	155.982
K02344	holD; DNA polymerase III subunit psi [EC:2.7.7.7]	1.11667	1.52667	0	1.17667	0.2	10.8667	2.78333	4.73333	2.26667	1.445
K02345	holE; DNA polymerase III subunit theta [EC:2.7.7.7]	0.866667	0	0	0	0.2	0.533333	2.53333	4.73333	2.26667	1.4
K02346	dinB; DNA polymerase IV [EC:2.7.7.7]	215.5	14.86	31.1633	24.9	43.6433	66.31	41.6167	116.567	97.3833	162.427
K02347	polX, dpx; DNA polymerase (family X)	62.4433	3.33333	6.11	7.22333	12.3333	25.7233	1.66667	54.1667	25.7233	47.4717
K02348	elaA; ElaA protein	66.22	4.86	9.77667	10.3433	10	28.11	21.9167	50	39.0567	51.115
K02351	K02351; putative membrane protein	40.6667	2.33333	0.333333	3.33333	4	4.66667	0.666667	0	8.66667	19.6667
K02352	drp35; lactonase [EC:3.1.1.-]	4.33333	1.33333	0	1.33333	2.33333	2.66667	0	0	0	6.83333
K02355	fusA, GFM, EFG; elongation factor G	389.393	21.58	48.44	44.0333	53.0633	126.847	69.65	274.133	166.93	260.272
K02356	efp; elongation factor P	274.507	14.3867	28.8867	25.7433	34.51	78.7333	48.0667	160.967	113.593	160.455
K02357	tsf, TSFM; elongation factor Ts	236.057	12.86	28.3867	24.5667	32.6433	67.0333	41.6167	151.233	105.66	154.815
K02358	tuf, TUFM; elongation factor Tu	353.367	19.72	42.8867	31.9667	44.62	96.7333	69.7333	235.467	152.207	223.94
K02361	entC; isochorismate synthase [EC:5.4.4.2]	29.17	1.66667	1.11	1.83333	4.53333	3.47667	8.86667	16.7333	23.38	18.5617
K02362	entD; enterobactin synthetase component D [EC:6.3.2.14 2.7.8.-]	23.7767	0	2	0.666667	0	2.83333	10.6667	13	8.55667	5.66667
K02363	entE, dhbE, vibE, mxcE; 2,3-dihydroxybenzoate-AMP ligase [EC:6.3.2.14 2.7.7.58]	26.9767	1.33333	0	3	2.64333	3.03333	7.2	16.4	6.15667	13.5667
K02364	entF; enterobactin synthetase component F [EC:6.3.2.14]	19.31	0	0	0	0.2	0.366667	7.2	9.73333	6.15667	2.23333
K02371	fabK; enoyl-[acyl-carrier protein] reductase II [EC:1.3.1.9]	33.3867	3.33333	4.44333	5.33333	9.66667	14.4433	2.5	19.5	23.6133	38.945
K02372	fabZ; 3-hydroxyacyl-[acyl-carrier-protein] dehydratase [EC:4.2.1.59]	183.36	13.86	24.2733	18.7333	27.5333	66.8133	44.2833	86.2333	64.1067	118.898
K02377	TSTA3, fcl; GDP-L-fucose synthase [EC:1.1.1.271]	64.4133	3.19333	4.55333	3.17667	6.66667	14.3333	12.25	38	27.8367	38.3033
K02379	fdhD; FdhD protein	179.003	8.72	25.9433	18.1867	20.6433	48.4233	37.7	109.9	68.38	104.282
K02380	fdhE; FdhE protein	56.1167	1.33333	5	3	1.53333	8.53333	21.2	34.7333	22.6	25.525
K02381	fdrA; FdrA protein	4.66667	0	1.66667	0	5	0.166667	0	0	0	7.66667
K02383	flbB; flagellar protein FlbB	0.5	0	0	0.666667	0	0	0	0	0	0
K02385	flbD; flagellar protein FlbD	24.1667	2.33333	2.66667	8	10	9.83333	1.66667	27.5	10.3333	27.5833
K02386	flgA; flagella basal body P-ring formation protein FlgA	123.67	9.72	17.1667	10.6867	9.2	39.0333	39.3667	71.4	45.1567	54.1983
K02387	flgB; flagellar basal-body rod protein FlgB	158.78	11.72	21.9433	21.02	21.2	54.09	45.2	95.5667	58.7133	97.42
K02388	flgC; flagellar basal-body rod protein FlgC	187.447	13.72	27.9433	24.6867	25.2	66.4233	54.5333	132.567	72.0467	117.253
K02389	flgD; flagellar basal-body rod modification protein FlgD	163.447	12.3867	21.9433	21.6867	20.2	54.09	41.5333	95.5667	58.7133	99.42
K02390	flgE; flagellar hook protein FlgE	178.78	14.3867	26.2767	24.02	27.5333	64.09	45.7	96.2333	65.0467	115.253
K02391	flgF; flagellar basal-body rod protein FlgF	122.947	10.0533	17.9433	10.6867	9.53333	44.9233	41.0333	71.4	50.7133	60.8367
K02392	flgG; flagellar basal-body rod protein FlgG	200.557	15.0533	22.72	29.6867	24.2	68.1467	47.3667	108.733	74.9367	128.363
K02393	flgH; flagellar L-ring protein precursor FlgH	142.28	10.0533	18.61	11.3533	10.2	44.2567	41.0333	71.4	57.0467	69.17
K02394	flgI; flagellar P-ring protein precursor FlgI	134.613	10.0533	18.61	12.02	10.2	44.2567	41.0333	71.4	50.7133	64.67
K02395	flgJ; flagellar protein FlgJ	117.977	7.72	18.8333	13.6867	3.86667	38.3667	45.8667	100.733	52.49	53.0733
K02396	flgK; flagellar hook-associated protein 1 FlgK	164.17	12.0533	20.5	21.6867	20.2	48.8667	44.5333	94.2333	55.49	96.2817
K02397	flgL; flagellar hook-associated protein 3 FlgL	149.17	11.3867	20.8333	21.02	19.8667	49.8667	40.7	95.2333	54.49	90.2817
K02398	flgM; negative regulator of flagellin synthesis FlgM	112.367	6.72	15.8333	15.02	8.53333	33.3667	37.2	77.5667	54.6	62.685
K02399	flgN; flagella synthesis protein FlgN	75.7	5.72	11.3333	9.02	1.86667	32.2	31.3667	65.4	33.9333	35.6567
K02400	flhA; flagellar biosynthesis protein FlhA	174.89	12.3867	23.2767	22.3533	25.2	63.4233	47.2	108.567	67.6033	109.698
K02401	flhB; flagellar biosynthetic protein FlhB	174.447	12.3867	25.9433	22.3533	24.8667	64.9233	42.0333	108.567	66.0467	113.198
K02402	flhC; flagellar transcriptional activator FlhC	23.5333	1.33333	4.66667	3	1.2	5.86667	11.8667	29.7333	19.6	23.4
K02403	flhD; flagellar transcriptional activator FlhD	23.5333	1.33333	4.66667	3	1.2	5.86667	11.8667	29.7333	19.6	23.4
K02404	flhF; flagellar biosynthesis protein FlhF	113.027	6.86	10.9433	14.1767	9.66667	33.89	24.5833	48.8333	43.5567	58.9067
K02405	fliA; RNA polymerase sigma factor for flagellar operon FliA	186.81	10.3867	26.9433	25.3567	22.6433	65.4233	52.8667	174.567	75.1567	123.962
K02406	fliC; flagellin	329.363	16.3533	31.61	37.9033	24.8667	68.09	83.95	165.9	94.0467	164.978
K02407	fliD; flagellar hook-associated protein 2	162.143	10.3867	22.9433	20.02	16.5333	51.7567	56.0333	118.233	66.1567	94.9617
K02408	fliE; flagellar hook-basal body complex protein FliE	160.447	12.3867	21.9433	21.02	21.2	53.4233	45.7	95.5667	58.7133	97.42
K02409	fliF; flagellar M-ring protein FliF	160.447	12.3867	21.2767	21.02	21.2	53.2567	45.7	95.5667	58.7133	97.42
K02410	fliG; flagellar motor switch protein FliG	162.28	12.3867	21.2767	22.6867	21.2	52.9233	45.7	95.5667	58.7133	98.1983
K02411	fliH; flagellar assembly protein FliH	144.033	10.0533	17.8333	17.02	16.5333	48.7	38.7	94.2333	54.9333	80.49
K02412	fliI; flagellum-specific ATP synthase [EC:3.6.3.14]	171.78	12.3867	23.2767	21.6867	25.2	63.2567	45.7	108.567	63.38	107.087
K02413	fliJ; flagellar FliJ protein	104.117	5.86	10.1667	11.8433	7.53333	27.3667	25.45	53.5667	42.6	52.695
K02414	fliK; flagellar hook-length control protein FliK	102.7	7.38667	11.8333	10.6867	5.2	36.5333	35.5333	71.4	42.9333	49.9067
K02415	fliL; flagellar FliL protein	189.643	13.58	22.5	22.8633	20.8667	60.3667	48.2833	106.9	64.2667	95.3267
K02416	fliM; flagellar motor switch protein FliM	168.587	10.5267	22.5	21.1767	23.5333	46.7	44.45	96.2333	63.8233	106.57
K02417	fliNY, fliN; flagellar motor switch protein FliN/FliY	168.113	12.3867	21.9433	21.6867	22.2	54.2567	46.2	95.5667	61.0467	103.615
K02418	fliOZ, fliO; flagellar protein FliO/FliZ	105.117	5.86	11.8333	12.51	11.8667	29.3667	25.95	58.9	36.2667	55.695
K02419	fliP; flagellar biosynthetic protein FliP	171.78	12.3867	23.2767	22.3533	25.2	62.59	45.7	108.567	67.0467	109.865
K02420	fliQ; flagellar biosynthetic protein FliQ	175.447	12.3867	25.9433	22.3533	25.8667	64.59	46.7	107.567	63.38	112.032
K02421	fliR; flagellar biosynthetic protein FliR	174.78	12.3867	25.9433	22.3533	25.8667	63.9233	46.7	108.567	62.38	111.698
K02422	fliS; flagellar protein FliS	157.2	8.72	18.8333	20.02	18.2	53.2	46.2	94.9	58.9333	91.8233
K02423	fliT; flagellar protein FliT	37.8667	4.33333	10	7.66667	3.53333	13.5333	21.2	53.7333	30.6	44.5667
K02424	fliY; cystine transport system substrate-binding protein	50.81	3.66667	6	6	2.53333	14.0333	18.5333	30.0667	25.8233	35.4833
K02425	fliZ; regulator of sigma S factor FliZ	0.866667	0	0	0	0.2	0.366667	2.53333	4.73333	2.26667	1.4
K02426	sufE; cysteine desulfuration protein SufE	118.647	7.52667	7.61	5.17667	12.7333	26.51	26.3167	60.8	43.8133	45.5767
K02427	rlmE, rrmJ, ftsJ; 23S rRNA (uridine2552-2'-O)-methyltransferase [EC:2.1.1.166]	120.92	6.86	13.1667	6.73333	10.8667	26.5333	29.2833	48.4	37.49	53.9867
K02428	rdgB; XTP/dITP diphosphohydrolase [EC:3.6.1.66]	297.917	16.1933	30.1633	27.7333	42.42	76.1433	46.6167	210.233	131.55	191.143
K02429	fucP; MFS transporter, FHS family, L-fucose permease	62.8633	3.66667	9.27667	3	8.53333	11.1433	22.8667	43.4	48.16	29.57
K02430	fucR; DeoR family transcriptional regulator, L-fucose operon activator	0	0	0	0	0	0.166667	0	0.333333	0	0
K02431	fucU, FUOM; L-fucose mutarotase [EC:5.1.3.29]	11.5267	2	3	1.66667	4	4.16667	1	0.333333	6.89	13.7083
K02433	gatA, QRSL1; aspartyl-tRNA(Asn)/glutamyl-tRNA(Gln) amidotransferase subunit A [EC:6.3.5.6 6.3.5.7]	359.943	21.6667	48.11	34.6133	52.42	94.4233	64.7	223.567	147.44	262.33
K02434	gatB, PET112; aspartyl-tRNA(Asn)/glutamyl-tRNA(Gln) amidotransferase subunit B [EC:6.3.5.6 6.3.5.7]	221.58	11	27.11	24.0567	30.7767	54.2233	35.1667	157.833	92.7267	145.708
K02435	gatC, GATC; aspartyl-tRNA(Asn)/glutamyl-tRNA(Gln) amidotransferase subunit C [EC:6.3.5.6 6.3.5.7]	215.247	11	26.4433	23.39	30.7767	54.2233	35.1667	142.5	86.7267	143.042
K02436	gatR; DeoR family transcriptional regulator, galactitol utilization operon repressor	0	0	0	0	0	0.166667	0	0	0	0
K02437	gcvH, GCSH; glycine cleavage system H protein	263.5	15.86	30.4967	26.2333	32.9767	85.9233	54.2833	166.9	115.993	162.82
K02438	glgX; glycogen debranching enzyme [EC:3.2.1.196]	124.447	10.5267	10.5533	8.79	23.1967	50.48	25.1167	65.0667	39.4367	87.0283
K02439	glpE; thiosulfate sulfurtransferase [EC:2.8.1.1]	24.45	1.52667	2	1.84333	0.866667	13.0333	12.45	17.4	13.9333	6.945
K02440	GLPF; glycerol uptake facilitator protein	53.7533	7.52667	7.77667	10.1767	11.42	39.09	11.1167	56.4	29.5467	54.32
K02441	glpG; GlpG protein	46.7267	1.86	2.77667	1.84333	2.86667	17.2567	14.1167	17.4	16.1567	9.30667
K02442	glpM; membrane protein GlpM	11	1.33333	2	1.66667	0	12.6667	5.33333	12.6667	6.33333	5.5
K02443	glpP; glycerol uptake operon antiterminator	12.5	3	3	8.33333	4	11.1667	0	0	8	22.5
K02444	glpR; DeoR family transcriptional regulator, glycerol-3-phosphate regulon repressor	100.503	6.19333	8	6.51	6.86667	21.3667	27.6167	41.7333	28.49	44.5283
K02445	glpT; MFS transporter, OPA family, glycerol-3-phosphate transporter	13.45	1.52667	2	2.06667	0.2	13.0333	8.11667	17.4	9.43333	6.945
K02446	glpX; fructose-1,6-bisphosphatase II [EC:3.1.3.11]	64.95	5.19333	7.66667	11.6767	14.9767	31.3667	5.45	67.5667	25.3233	66.445
K02448	norD; nitric oxide reductase NorD protein	13.5267	0	1.66667	0.666667	0	1.33333	6	11.6667	6.55667	4.70833
K02450	gspA; general secretion pathway protein A	35.9167	3.52667	4.66667	4.17667	3.33333	15.5	9.58333	24	10	13.9333
K02451	gspB; general secretion pathway protein B	33.5833	3.52667	4.66667	4.17667	2	14.6667	9.58333	24	10	11.545
K02452	gspC; general secretion pathway protein C	108.45	3.52667	8	5.06667	4.86667	17.3667	25.1167	46.0667	29.6	30.6117
K02453	gspD; general secretion pathway protein D	155.727	9.19333	24.9433	15.7333	8.2	53.2567	59.7833	125.4	69.8233	79.7783
K02454	gspE; general secretion pathway protein E	228.003	10.86	32.3867	19.6233	9.53333	67.3133	83.6167	166.733	92.27	101.75
K02455	gspF; general secretion pathway protein F	143.727	6.52667	20.2767	11.7333	6.53333	37.59	49.95	100.067	58.8233	64.39
K02456	gspG; general secretion pathway protein G	203.727	11.86	43.9433	26.29	8.53333	66.09	93.2833	215.733	101.38	128.112
K02457	gspH; general secretion pathway protein H	105.117	3.52667	9.16667	5.06667	3.86667	18.8667	28.2833	51.0667	32.9333	27.5283
K02458	gspI; general secretion pathway protein I	105.117	3.52667	9.16667	5.06667	3.86667	20.3667	28.2833	51.0667	37.6	27.8617
K02459	gspJ; general secretion pathway protein J	111.45	3.52667	9.83333	5.73333	3.86667	19.8667	28.2833	51.0667	33.9333	31.8617
K02460	gspK; general secretion pathway protein K	108.117	3.52667	9.16667	5.73333	3.86667	20.3667	28.2833	51.0667	37.6	28.3617
K02461	gspL; general secretion pathway protein L	108.45	3.52667	9.83333	5.06667	3.86667	19.8667	28.2833	51.0667	32.9333	31.0283
K02462	gspM; general secretion pathway protein M	99.1167	2.86	9.16667	5.06667	3.86667	18.2	28.2833	51.0667	32.9333	27.3617
K02463	gspN; general secretion pathway protein N	61.25	2.86	5.5	4.17667	3.66667	17.3333	13.75	30	19.6667	20.1283
K02464	gspO; general secretion pathway protein O [EC:3.4.23.43 2.1.1.-]	0	0	0	0	0	0.166667	0	0	0	0
K02465	gspS; general secretion pathway protein S	0.866667	0	0	0	0.2	0.2	2.53333	4.4	2.26667	1.4
K02466	gutM; glucitol operon activator protein	0.95	0	0	0	0.2	0.366667	3.86667	4.73333	2.26667	1.44167
K02467	gutQ; arabinose 5-phosphate isomerase [EC:5.3.1.13]	0.866667	0	0	0	0.2	0.366667	2.53333	4.73333	2.26667	1.4
K02468	srlR, gutR; DeoR family transcriptional regulator, glucitol operon repressor	0.866667	0	0	0	0.2	0.366667	2.53333	4.73333	2.26667	1.4
K02469	gyrA; DNA gyrase subunit A [EC:5.99.1.3]	287.5	15.5267	32.83	27.1233	41.7533	79.2567	47.6167	201.567	120.55	196.148
K02470	gyrB; DNA gyrase subunit B [EC:5.99.1.3]	259.833	14.5267	32.1633	26.4567	41.7533	78.2567	45.6167	165.567	112.55	186.37
K02471	bacA; vitamin B12/bleomycin/antimicrobial peptide transport system ATP-binding/permease protein	58.17	5.66667	8.33333	4	8.86667	13.3667	13.3667	38.7333	20.0467	39.8583
K02472	wecC; UDP-N-acetyl-D-mannosaminuronic acid dehydrogenase [EC:1.1.1.336]	25.8667	2.33333	2.33333	8	3.2	8.03333	3.03333	31.4	9.6	22.4
K02473	wbpP; UDP-N-acetylglucosamine 4-epimerase [EC:5.1.3.7]	3.44333	0.333333	0.443333	0	1	0.443333	0.666667	0	7.5	4.77833
K02474	wbpO; UDP-N-acetyl-D-galactosamine dehydrogenase [EC:1.1.1.-]	68.11	3	7.94333	3	7	8.11	14.6667	31.3333	29.39	28.8617
K02475	K02475; two-component system, CitB family, response regulator	27.5833	4.19333	0	2.84333	5.66667	7	1.25	1	1	17.045
K02476	K02476; two-component system, CitB family, sensor kinase [EC:2.7.13.3]	34.9167	4.19333	0	2.84333	5.77667	7	1.91667	1	4.66667	19.8783
K02477	K02477; two-component system, LytTR family, response regulator	73.2867	6.19333	15.8867	7.84333	16.0667	32.2867	33.15	76.6333	87.0967	67.3683
K02478	K02478; two-component system, LytTR family, sensor kinase [EC:2.7.13.3]	22.15	2.86	3	2.84333	8.84333	16.7333	7.31667	25.8	6.86667	24.345
K02479	K02479; two-component system, NarL family, response regulator	34	0	0	0	0.11	2.66667	4.66667	6	4.66667	6
K02480	K02480; two-component system, NarL family, sensor kinase [EC:2.7.13.3]	49.4433	3.86	8.33333	8.51	4.33333	14.3333	16.9167	36.6667	25.5567	42.5867
K02481	K02481; two-component system, NtrC family, response regulator	40.5533	2	3.88667	2.33333	9.33333	24.78	4.33333	1.33333	11.6133	25.6667
K02482	K02482; two-component system, NtrC family, sensor kinase [EC:2.7.13.3]	14.0267	3.52667	3.66667	2.84333	3	12.3333	1.25	5.66667	1.16667	7.37833
K02483	K02483; two-component system, OmpR family, response regulator	466.017	26.86	63.8867	39.29	49.33	110.113	132.25	323.333	146.673	248.1
K02484	K02484; two-component system, OmpR family, sensor kinase [EC:2.7.13.3]	150.143	10	34	22.5	11.3067	40.7	61.8667	222.4	93.1567	132.317
K02485	rssB, hnr; two-component system, response regulator	22.2	0	0.5	0	0.2	0.7	6.2	9.73333	6.82333	4.31667
K02486	K02486; two-component system, sensor kinase [EC:2.7.13.3]	0	0	0	0	0	0	0	0	0	0
K02487	pilL; type IV pili sensor histidine kinase and response regulator	8	0	1.66667	0.666667	0	0.666667	4	11.6667	6	4.5
K02488	pleD; two-component system, cell cycle response regulator [EC:2.7.7.65]	24.5267	1.33333	0	0	3	3.33333	3.33333	0	1.89	9.95833
K02490	spo0F; two-component system, response regulator, stage 0 sporulation protein F	6.33333	2.33333	2	5.33333	2.33333	7	0	6.16667	7	16.6667
K02491	kinA; two-component system, sporulation sensor kinase A [EC:2.7.13.3]	0.666667	0	0.666667	0	0	0	0	0	0	5.16667
K02492	hemA; glutamyl-tRNA reductase [EC:1.2.1.70]	203.003	9.52667	20.72	19.5667	24.6433	58.7	37.7833	130.9	91.4933	132.057
K02493	hemK, prmC, HEMK; release factor glutamine methyltransferase [EC:2.1.1.297]	255.39	12.86	31.72	26.9	43.53	69.7	44.95	169.567	109.66	180.315
K02494	lolB; outer membrane lipoprotein LolB	88.1167	3.52667	8.5	4.84333	2.86667	20.0333	25.45	47.4	34.6	30.5283
K02495	hemN, hemZ; oxygen-independent coproporphyrinogen III oxidase [EC:1.3.98.3]	409.98	29.2467	55.44	45.5867	51.0433	123.767	101.683	282.867	193.92	265.963
K02496	hemX; uroporphyrin-III C-methyltransferase [EC:2.1.1.107]	68.7833	2.86	6.83333	4.17667	2.86667	19.8667	21.45	35.7333	22.2667	21.195
K02497	hemX; HemX protein	7.66667	2.33333	2	5.33333	2.33333	7	0	0	7	16.6667
K02498	hemY; HemY protein	103.31	6.19333	11.5	6.51	7.53333	24.2	28.7833	47.4	37.49	42.4867
K02499	yabN; tetrapyrrole methylase family protein / MazG family protein	73.5	2.33333	12.3333	15.89	12.6667	27.1667	1	66.8333	30.39	69.0833
K02500	hisF; cyclase [EC:4.1.3.-]	239.807	12.86	27.3867	24.5667	31.6433	66.7	41.6167	147.233	104.437	152.148
K02501	hisH; glutamine amidotransferase [EC:2.4.2.-]	239.807	12.86	27.3867	24.5667	31.6433	66.7	41.6167	147.233	104.437	152.148
K02502	hisZ; ATP phosphoribosyltransferase regulatory subunit	170.803	8	16.6667	15.89	17	36.1667	25.5	88.5	41.89	91.7917
K02503	HINT1, hinT, hit; histidine triad (HIT) family protein	236.28	16.1933	30.22	30.66	40.9767	76.3667	40.45	162.567	107.327	184.648
K02504	hofB; protein transport protein HofB	0.866667	0	0	0	0.2	0.366667	2.53333	4.73333	2.26667	1.4
K02505	hofC; protein transport protein HofC	0.866667	0	0	0	0.2	0.366667	2.53333	4.73333	2.26667	1.51167
K02506	hofD, hopD; leader peptidase HopD [EC:3.4.23.43]	0	0	0	0	0	0	0	0.333333	0	0
K02507	hofQ; protein transport protein HofQ	0.866667	0	0	0	0.2	0.366667	2.53333	4.73333	3.49	1.4
K02508	hpaA; AraC family transcriptional regulator, 4-hydroxyphenylacetate 3-monooxygenase operon regulatory protein	8.86667	0	1.66667	0.666667	0.2	1.03333	6.53333	16.4	8.26667	5.9
K02509	hpaH; 2-oxo-hept-3-ene-1,7-dioate hydratase [EC:4.2.1.-]	14.9767	1.33333	1.66667	0.666667	0.2	5.36667	10.8667	16.4	10.1567	14.0667
K02510	hpaI, hpcH; 4-hydroxy-2-oxoheptanedioate aldolase [EC:4.1.2.52]	60.3067	6.66667	20.5533	6.66667	15.5333	25.6467	20.2	28.4	29.66	61.345
K02511	hpaX; MFS transporter, ACS family, 4-hydroxyphenylacetate permease	3.86667	0	0.333333	0	0.2	2.03333	3.86667	6.06667	2.6	2.4
K02517	lpxL, htrB; Kdo2-lipid IVA lauroyltransferase [EC:2.3.1.241]	265.5	11.2467	30.5533	22.81	21.9767	63.3667	61.6167	135.067	118.273	118.517
K02518	infA; translation initiation factor IF-1	238.39	11.5267	23.72	21.5667	33.9767	64.7	32.2833	132.567	104.66	154.315
K02519	infB, MTIF2; translation initiation factor IF-2	237.39	12.86	28.3867	24.5667	32.6433	67.0333	42.1167	151.233	105.66	155.037
K02520	infC, MTIF3; translation initiation factor IF-3	233.723	12.86	28.0533	24.5667	32.6433	66.0333	40.2833	146.233	105.327	154.148
K02521	ilvY; LysR family transcriptional regulator, positive regulator for ilvC	1.11667	1.52667	0	1.17667	0.866667	10.7	2.78333	4.73333	5.93333	1.77833
K02523	ispB; octaprenyl-diphosphate synthase [EC:2.5.1.90]	169.723	8.19333	22.3867	16.4	18.2	42.7	32.6167	88.0667	84.1033	94.7317
K02525	kdgR; LacI family transcriptional regulator, kdg operon repressor	38.2	4	6.66667	6.33333	4.86667	12.8667	17.2	41.4	23.6	38.5667
K02526	kdgT; 2-keto-3-deoxygluconate permease	0.666667	0	0	0	0	0.166667	0	0.333333	0	0.666667
K02527	kdtA, waaA; 3-deoxy-D-manno-octulosonic-acid transferase [EC:2.4.99.12 2.4.99.13 2.4.99.14 2.4.99.15]	142.057	8.86	17.0533	12.51	14.2	40.5333	34.45	56.7333	76.4933	73.9817
K02528	ksgA; 16S rRNA (adenine1518-N6/adenine1519-N6)-dimethyltransferase [EC:2.1.1.182]	236.723	12.86	28.3867	24.5667	32.6433	67.0333	41.1167	152.233	105.66	155.315
K02529	lacI, galR; LacI family transcriptional regulator	508.373	40.2467	90.1033	76.03	65.1	159.11	165.25	491.667	297.963	457.44
K02530	lacR; DeoR family transcriptional regulator, lactose phosphotransferase system repressor	1.33333	0	0	0	0	0	0	1	0	0
K02531	lacT; transcriptional antiterminator	0	0	0	0	0	0	0	1	0	0
K02532	lacY; MFS transporter, OHS family, lactose permease	1.53333	0	0	0	0.2	0.366667	2.53333	5.4	2.26667	1.4
K02533	lasT; tRNA/rRNA methyltransferase [EC:2.1.1.-]	80.67	5.66667	9.33333	4.66667	9.86667	13.5333	18.8667	55.0667	32.6567	44.2467
K02535	lpxC; UDP-3-O-[3-hydroxymyristoyl] N-acetylglucosamine deacetylase [EC:3.5.1.108]	143.363	8.19333	14.9433	7.84333	10.5333	32.7567	34.1167	73.4	46.27	62.2917
K02536	lpxD; UDP-3-O-[3-hydroxymyristoyl] glucosamine N-acyltransferase [EC:2.3.1.191]	160.167	9.52667	17.1633	12.51	17.5333	41.9767	40.1167	75.4	88.9933	86.26
K02538	manR; activator of the mannose operon, transcriptional antiterminator	1.33333	0	0	0	0	0	0	0	0	0
K02548	menA; 1,4-dihydroxy-2-naphthoate octaprenyltransferase [EC:2.5.1.74 2.5.1.-]	132.643	7.19333	13.4433	12.9	18.8667	36.31	7.11667	110.4	71.5467	78.0233
K02549	menC; O-succinylbenzoate synthase [EC:4.2.1.113]	32.5333	6.86	5.66667	9.34333	14.8667	29.3667	4.78333	33.7333	13.9333	51.6267
K02550	glcA; glycolate permease	0	0	0	0	0	0.166667	0	0	0	0
K02551	menD; 2-succinyl-5-enolpyruvyl-6-hydroxy-3-cyclohexene-1-carboxylate synthase [EC:2.2.1.9]	81.9767	6.52667	6.11	8.23333	15.8667	32.31	7.11667	62.4	34.3233	62.5233
K02552	menF; menaquinone-specific isochorismate synthase [EC:5.4.4.2]	49.7833	5.19333	5	7.73333	13.8667	31.8667	2.78333	27.7333	9.76667	49.3617
K02553	rraA, menG; regulator of ribonuclease activity A	62.2	5.72	8.83333	6.52	3.86667	29.0333	23.0333	53.4	23.9333	25.3233
K02554	mhpD; 2-keto-4-pentenoate hydratase [EC:4.2.1.80]	38.3333	2.66667	4.83333	5	12.7767	10.1667	6	23.6667	6	37.695
K02556	motA; chemotaxis protein MotA	332.78	15.0533	36.2767	29.02	29.8667	71.4233	82.5333	165.9	108.713	152.087
K02557	motB; chemotaxis protein MotB	371.553	19.0533	36.4967	28.3567	39.5333	75.1967	76.7	144.233	123.27	177.292
K02558	mpl; UDP-N-acetylmuramate: L-alanyl-gamma-D-glutamyl-meso-diaminopimelate ligase [EC:6.3.2.45]	98.56	4.52667	12.2767	6.4	5.86667	25.31	27.1167	48.7333	51.99	49.3067
K02560	lpxM, msbB; lauroyl-Kdo2-lipid IVA myristoyltransferase [EC:2.3.1.243]	1.11667	1.52667	0	1.17667	0.2	10.7	2.78333	4.73333	2.26667	1.445
K02562	mtlR; mannitol operon repressor	1.11667	1.52667	0	1.17667	0.2	10.7	2.78333	4.73333	2.26667	1.445
K02563	murG; UDP-N-acetylglucosamine--N-acetylmuramyl-(pentapeptide) pyrophosphoryl-undecaprenol N-acetylglucosamine transferase [EC:2.4.1.227]	235.613	12.5267	25.9433	23.5667	32.6433	66.1433	42.2833	156.567	103.437	153.982
K02564	nagB, GNPDA; glucosamine-6-phosphate deaminase [EC:3.5.99.6]	38.28	9.19333	7.88667	8.84333	14.6433	33.7	6.11667	11.4	40.0467	48.7967
K02565	nagC; N-acetylglucosamine repressor	1.56	1.86	0.443333	1.17667	0.2	11.59	2.78333	4.73333	4.49	1.77833
K02566	nagD; NagD protein	21.81	1.66667	2.44333	2.83333	7.31	8.59	4.86667	24.7333	13.88	28.9
K02567	napA; periplasmic nitrate reductase NapA [EC:1.7.99.-]	14.9167	2.86	0.833333	2.17667	0	22.8333	5.91667	1	2	1.795
K02568	napB; cytochrome c-type protein NapB	14.9167	1.52667	0.833333	1.17667	0	12.5	5.91667	1	2	1.795
K02569	napC; cytochrome c-type protein NapC	14.9167	2.86	0.833333	2.17667	0	22.8333	5.91667	1	2	1.795
K02570	napD; periplasmic nitrate reductase NapD	14.9167	1.52667	0.833333	1.17667	0	12.5	5.91667	1	2	1.795
K02571	napE; periplasmic nitrate reductase NapE	14.9167	1.52667	0.833333	1.17667	0	12.3333	5.91667	1	2	1.795
K02572	napF; ferredoxin-type protein NapF	0.25	1.52667	0	1.17667	0	10.5	0.25	0	0	0.211667
K02573	napG; ferredoxin-type protein NapG	0.25	0.193333	0	0.176667	0	0.166667	0.25	0	0	0.045
K02574	napH; ferredoxin-type protein NapH	0.25	0.193333	0	0.176667	0	0.166667	0.25	0	0	0.045
K02575	NRT, narK, nrtP, nasA; MFS transporter, NNP family, nitrate/nitrite transporter	274.67	8	24.7767	14.3333	19.31	36.09	60.8667	134.4	77.27	111.608
K02584	nifA; Nif-specific regulatory protein	13.8867	0.666667	5.88667	2.78	3.33333	11.4467	4.33333	0	8.11333	23.11
K02585	nifB; nitrogen fixation protein NifB	0.666667	0	1.66667	0	0	0.333333	0	0	0	2
K02586	nifD; nitrogenase molybdenum-iron protein alpha chain [EC:1.18.6.1]	3	0	1.66667	0	0	0.333333	0	0	0	2.33333
K02587	nifE; nitrogenase molybdenum-cofactor synthesis protein NifE	1	0	1.66667	0	0	0	0	0	1.22333	2.33333
K02588	nifH; nitrogenase iron protein NifH [EC:1.18.6.1]	2	0	1.66667	0	0	0.333333	0	6.16667	1.22333	4.16667
K02589	nifHD1, nifI1; nitrogen regulatory protein PII 1	1	0	0	0	0	0	0	0	0	0.333333
K02590	nifHD2, nifI2; nitrogen regulatory protein PII 2	1	0	0	0	0	0	0	0	0	0.333333
K02591	nifK; nitrogenase molybdenum-iron protein beta chain [EC:1.18.6.1]	3	0	1.66667	0	0	0.333333	0	0	0	2.33333
K02592	nifN; nitrogenase molybdenum-iron protein NifN	0	0	1.66667	0	0	0	0	0	0	1.66667
K02593	nifT; nitrogen fixation protein NifT	0	0	1.66667	0	0	0	0	0	0	1.66667
K02594	nifV; homocitrate synthase NifV [EC:2.3.3.14]	2.66667	0	2.66667	0	0	1	0	0	1	5
K02595	nifW; nitrogenase-stabilizing/protective protein	0	0	1.66667	0	0	0	0	0	0	1.66667
K02596	nifX; nitrogen fixation protein NifX	0	0	1.66667	0	0	0	0	0	0	1.66667
K02597	nifZ; nitrogen fixation protein NifZ	0	0	3.33333	0	0	0	0	0	0	3.33333
K02598	nirC; nitrite transporter	3.66667	0	1	0	0.666667	1.83333	1	0	0	4.16667
K02600	nusA; N utilization substance protein A	236.723	12.86	28.3867	24.5667	32.6433	67.0333	41.6167	152.233	105.66	155.315
K02601	nusG; transcriptional antiterminator NusG	237.557	12.86	28.3867	24.5667	32.6433	67.0333	41.6167	152.233	105.66	155.648
K02609	paaA; ring-1,2-phenylacetyl-CoA epoxidase subunit PaaA [EC:1.14.13.149]	53.2	2.66667	9	5.33333	9.31	15.7	16.8667	40.4	26.49	45.9
K02610	paaB; ring-1,2-phenylacetyl-CoA epoxidase subunit PaaB	39.8667	2.66667	8.33333	5.33333	9.31	13.7	16.8667	40.4	26.49	38.0667
K02611	paaC; ring-1,2-phenylacetyl-CoA epoxidase subunit PaaC [EC:1.14.13.149]	45.2	2.66667	8.33333	5.33333	9.31	13.7	16.8667	40.4	26.49	39.7333
K02612	paaD; ring-1,2-phenylacetyl-CoA epoxidase subunit PaaD	39.8667	2.66667	8.33333	5.33333	9.31	13.7	16.8667	40.4	26.49	38.0667
K02613	paaE; ring-1,2-phenylacetyl-CoA epoxidase subunit PaaE	38.9767	3.66667	9.44333	4.66667	10.31	15.4767	17.5333	41.7333	36.5467	43.1783
K02614	paaI; acyl-CoA thioesterase [EC:3.1.2.-]	53.8667	2.66667	8.66667	5.33333	2.53333	14.3667	21.5333	48.7333	27.9333	41.7333
K02615	paaJ; 3-oxo-5,6-didehydrosuberyl-CoA/3-oxoadipyl-CoA thiolase [EC:2.3.1.223 2.3.1.174]	1.66667	0	0.666667	0	0	0.166667	0	0.333333	0	2.33333
K02616	paaX; phenylacetic acid degradation operon negative regulatory protein	57.2	1.33333	9.33333	8	6.42	14.0333	18.2	62.4	15.6	44.7333
K02617	paaY; phenylacetic acid degradation protein	16.8667	1.33333	5	3	1.53333	7.7	13.8667	29.7333	11.2667	16.2333
K02618	paaZ; oxepin-CoA hydrolase / 3-oxo-5,6-dehydrosuberyl-CoA semialdehyde dehydrogenase [EC:3.3.2.12 1.2.1.91]	21.8667	2.66667	6.66667	3.22333	3.2	11.0333	16.2	34.4	14.9333	24.7333
K02619	pabC; 4-amino-4-deoxychorismate lyase [EC:4.1.3.38]	70.06	6.52667	6	9.34333	5.2	24.7	15.45	31.7333	32.0467	35.9817
K02621	parC; topoisomerase IV subunit A [EC:5.99.1.-]	125.28	10.1933	15.61	11.8433	15.5333	36.9767	30.45	49.7333	62.7133	71.8983
K02622	parE; topoisomerase IV subunit B [EC:5.99.1.-]	130.223	10.5267	17.72	11.8433	16.5333	42.5333	33.1167	49.7333	64.9367	79.815
K02623	pcaQ; LysR family transcriptional regulator, pca operon transcriptional activator	40.86	0	2	0.666667	0	4.33333	11.6667	12.6667	14.89	15.5417
K02624	pcaR; IclR family transcriptional regulator, pca regulon regulatory protein	79.3033	4.66667	10	9.33333	5.22	15.3333	27	60	26.5567	56.5417
K02625	pcaT; MFS transporter, MHS family, dicarboxylic acid transporter PcaT	22.3333	1.33333	6.66667	3.66667	0	6	14.6667	36.6667	15	16.1667
K02626	pdaD; arginine decarboxylase [EC:4.1.1.19]	2.5	0	0	0	2.33333	0	0	1	2.33333	2.77833
K02634	petA; apocytochrome f	21.3333	1	0	0	0	1	2.66667	19.6667	3	4.33333
K02635	petB; cytochrome b6	28.6667	1	0	0	0.666667	1	2.66667	19.6667	3	5.33333
K02636	petC; cytochrome b6-f complex iron-sulfur subunit [EC:1.10.9.1]	29.3333	1	0	0	0.666667	1	2.66667	19.6667	3	8.27833
K02637	petD; cytochrome b6-f complex subunit 4	21.3333	1	0	0	0	1	2.66667	19.6667	3	4.33333
K02638	petE; plastocyanin	24.6667	1	0	0	0	1	2.66667	19.6667	3	4.33333
K02639	petF; ferredoxin	87.6667	4	0	0	0	5	10.6667	78.6667	12	18
K02640	petG; cytochrome b6-f complex subunit 5	21.3333	1	0	0	0	1	2.66667	19.6667	3	4.33333
K02641	petH; ferredoxin--NADP+ reductase [EC:1.18.1.2]	21.3333	1	0	0.666667	0	1	2.66667	19.6667	3	4.33333
K02642	petL; cytochrome b6-f complex subunit 6	0	0	0	0	0	0	0	0	0	0
K02643	petM; cytochrome b6-f complex subunit 7	21.3333	1	0	0	0	1	2.66667	19.6667	3	4.33333
K02647	cdaR; carbohydrate diacid regulator	20.95	3.86	4	6.51	3.86667	21.2	8.11667	17.4	10.9333	30.0283
K02650	pilA; type IV pilus assembly protein PilA	165.25	5.86	12.3333	10.4033	6	29.1667	30.25	58	42.3333	56.545
K02651	flp, pilA; pilus assembly protein Flp/PilA	139.637	9.05333	27.22	14.91	22.7767	52.6133	52.8333	160	70.78	94.4083
K02652	pilB; type IV pilus assembly protein PilB	198.523	9.52667	21.2733	15.9567	21.3333	87.2267	40.9167	118.5	75.6733	119.683
K02653	pilC; type IV pilus assembly protein PilC	184.58	9.19333	22.83	17.7333	16.6667	68.0033	45.5833	138.167	80.2267	121.378
K02654	pilD, pppA; leader peptidase (prepilin peptidase) / N-methyltransferase [EC:3.4.23.43 2.1.1.-]	200.093	6.19333	21.2767	15.9	20.51	51.4567	40.15	156.3	80.48	108.345
K02655	pilE; type IV pilus assembly protein PilE	91.25	3.52667	8.5	4.84333	3.66667	24.1667	22.9167	42.6667	33.89	38.795
K02656	pilF; type IV pilus assembly protein PilF	77.7833	3.52667	8.5	4.84333	2.86667	20.3667	25.45	47.0667	27.2667	26.0283
K02657	pilG; twitching motility two-component system response regulator PilG	118	4	8.5	3.66667	2	11.8333	28	82	27.3333	33.25
K02658	pilH; twitching motility two-component system response regulator PilH	115	3	9	3.66667	2	12.8333	34.3333	110.667	33.6667	33.5
K02659	pilI; twitching motility protein PilI	96.6667	3	7.16667	3.66667	2	10.8333	25.3333	62.3333	24.3333	28.9167
K02660	pilJ; twitching motility protein PilJ	96.6667	3	8.5	4.33333	2	10.8333	25.3333	62.3333	24.3333	29.25
K02661	pilK; type IV pilus assembly protein PilK	32.3333	0	0	0	1	0	4.33333	0	1.66667	0
K02662	pilM; type IV pilus assembly protein PilM	137.693	7.19333	14.9433	12.0667	11.6667	43.39	28.25	91.1667	44.2233	73.49
K02663	pilN; type IV pilus assembly protein PilN	119.75	4.52667	9.83333	5.06667	5	22.8333	25.5833	62.3333	36.6667	42.1283
K02664	pilO; type IV pilus assembly protein PilO	107.583	4.52667	9.83333	5.06667	3.33333	22.8333	25.5833	62.3333	29	37.4617
K02665	pilP; type IV pilus assembly protein PilP	70.9167	2.19333	4.5	2.06667	2.66667	16.5	13.5833	18.6667	16.3333	17.795
K02666	pilQ; type IV pilus assembly protein PilQ	97.9167	3.52667	9.83333	5.73333	5	23.1667	30.25	62.3333	36.78	46.795
K02667	pilR, pehR; two-component system, NtrC family, response regulator PilR	84.3333	2	11.1667	5.89	4	11.8333	23.6667	44	23.6667	37.4167
K02668	pilS, pehS; two-component system, NtrC family, sensor histidine kinase PilS [EC:2.7.13.3]	73.6667	0.666667	5.16667	1.33333	2	6.16667	13.3333	19.3333	12.6667	21.9167
K02669	pilT; twitching motility protein PilT	224.503	8.52667	22.0533	18.18	19.8667	69.3133	40.7833	167.567	65.9367	139.75
K02670	pilU; twitching motility protein PilU	97.5833	3.52667	9	4.84333	3.66667	24	26.5833	48.6667	29.6667	33.045
K02671	pilV; type IV pilus assembly protein PilV	77.25	3.52667	8.5	4.84333	2.66667	24.1667	22.9167	42.6667	25	33.6283
K02672	pilW; type IV pilus assembly protein PilW	85.25	2.19333	8.5	3.84333	3.66667	13.8333	22.9167	42.6667	29	38.795
K02673	pilX; type IV pilus assembly protein PilX	72.6667	1.33333	8.5	3.66667	1	9.66667	22.6667	41.6667	20	23.0833
K02674	pilY1; type IV pilus assembly protein PilY1	78.3333	2	8.5	3.89	2.66667	13.8333	22.6667	42.6667	21.3333	33.9167
K02676	pilZ; type IV pilus assembly protein PilZ	66.3333	0.666667	4.16667	1.11333	2.66667	4.5	12	17.6667	16	16.9167
K02679	ppdA; prepilin peptidase dependent protein A	0.866667	0	0	0	0.2	0.366667	2.53333	4.73333	2.26667	1.4
K02680	ppdB; prepilin peptidase dependent protein B	0.866667	0	0	0	0.2	0.7	2.53333	4.73333	2.26667	1.4
K02681	ppdC; prepilin peptidase dependent protein C	0.866667	0	0	0	0.2	0.366667	2.53333	4.73333	2.26667	1.4
K02682	ppdD; prepilin peptidase dependent protein D	0.866667	1.33333	0	1	0.2	10.7	2.53333	4.73333	2.26667	1.4
K02683	priS, pri1, priA; DNA primase small subunit [EC:2.7.7.-]	0	0	0	0	0	0	0	1	0	0.5
K02686	priB; primosomal replication protein N	13.7833	1.52667	0	1.17667	1.86667	12.5333	2.78333	5.73333	10.9333	12.7783
K02687	prmA; ribosomal protein L11 methyltransferase [EC:2.1.1.-]	204.78	11.1933	24.61	21.7333	21.5333	47.4767	38.2833	110.9	90.5467	119.815
K02688	prpR; transcriptional regulator, propionate catabolism operon regulatory protein	39.3333	2.66667	4.66667	4.33333	2.33333	6.5	13	29	18.3333	22.6667
K02689	psaA; photosystem I P700 chlorophyll a apoprotein A1	0	0	0	0	0	0	2.66667	19.6667	3	0.333333
K02690	psaB; photosystem I P700 chlorophyll a apoprotein A2	0	0	0	0	0	0	2.66667	19.6667	3	0.333333
K02691	psaC; photosystem I subunit VII	21.3333	1	0	0	0	1	2.66667	19.6667	3	4.33333
K02692	psaD; photosystem I subunit II	0	0	0	0	0	0	2.66667	19.6667	3	0.333333
K02693	psaE; photosystem I subunit IV	21.3333	1	0	0	0	1	2.66667	19.6667	3	4.33333
K02694	psaF; photosystem I subunit III	21.3333	1	0	0	0	1	2.66667	19.6667	3	4.33333
K02696	psaI; photosystem I subunit VIII	0	0	0	0	0	0	2.66667	19.6667	3	0.333333
K02697	psaJ; photosystem I subunit IX	21.3333	1	0	0	0	1	2.66667	19.6667	3	4.33333
K02698	psaK; photosystem I subunit X	21.3333	1	0	0	0	1	2.66667	19.6667	3	4.33333
K02699	psaL; photosystem I subunit XI	0	0	0	0	0	0	2.66667	19.6667	3	0.333333
K02700	psaM; photosystem I subunit XII	21.3333	1	0	0	0	1	2.66667	19.6667	3	4.33333
K02702	psaX; photosystem I 4.8kDa protein	0	0	0	0	0	0	0	0	0	0
K02703	psbA; photosystem II P680 reaction center D1 protein [EC:1.10.3.9]	42.6667	2	0	0	0	2	5.33333	39.3333	6	8.66667
K02704	psbB; photosystem II CP47 chlorophyll apoprotein	21.3333	1	0	0	0	1	2.66667	19.6667	3	4.33333
K02705	psbC; photosystem II CP43 chlorophyll apoprotein	21.3333	1	0	0	0	1	2.66667	19.6667	3	4.33333
K02706	psbD; photosystem II P680 reaction center D2 protein [EC:1.10.3.9]	21.3333	1	0	0	0	1	2.66667	19.6667	3	4.33333
K02707	psbE; photosystem II cytochrome b559 subunit alpha	21.3333	1	0	0	0	1	2.66667	19.6667	3	4.33333
K02708	psbF; photosystem II cytochrome b559 subunit beta	0	0	0	0	0	0	2.66667	19.6667	3	0.333333
K02709	psbH; photosystem II PsbH protein	21.3333	1	0	0	0	1	2.66667	19.6667	3	4.33333
K02710	psbI; photosystem II PsbI protein	0	0	0	0	0	0	2.66667	19.6667	3	0.333333
K02711	psbJ; photosystem II PsbJ protein	21.3333	1	0	0	0	1	2.66667	19.6667	3	4.33333
K02712	psbK; photosystem II PsbK protein	0	0	0	0	0	0	2.66667	19.6667	3	0.333333
K02713	psbL; photosystem II PsbL protein	0	0	0	0	0	0	2.66667	19.6667	3	0.333333
K02714	psbM; photosystem II PsbM protein	21.3333	1	0	0	0	1	2.66667	19.6667	3	4.33333
K02715	psbN; PsbN protein	21.3333	1	0	0	0	1	2.66667	19.6667	3	4.33333
K02716	psbO; photosystem II oxygen-evolving enhancer protein 1	21.3333	1	0	0	0	1	2.66667	19.6667	3	4.33333
K02717	psbP; photosystem II oxygen-evolving enhancer protein 2	21.3333	1	0	0	0	1	2.66667	19.6667	3	4.33333
K02718	psbT; photosystem II PsbT protein	21.3333	1	0	0	0	1	2.66667	19.6667	3	4.33333
K02719	psbU; photosystem II PsbU protein	0	0	0	0	0	0	2.66667	19.6667	3	0.333333
K02720	psbV; photosystem II cytochrome c550	42.6667	2	0	0	0	2	5.33333	39.3333	6	8.66667
K02722	psbX; photosystem II PsbX protein	21.3333	1	0	0	0	1	2.66667	19.6667	3	4.33333
K02723	psbY; photosystem II PsbY protein	21.3333	1	0	0	0	1	2.66667	19.6667	3	4.33333
K02724	psbZ; photosystem II PsbZ protein	21.3333	1	0	0	0	1	2.66667	19.6667	3	4.33333
K02742	sprT; SprT protein	23.7833	1.52667	2	1.84333	0.2	13.0333	12.45	17.4	10.2667	6.945
K02744	PTS-Aga-EIIA, agaF; PTS system, N-acetylgalactosamine-specific IIA component [EC:2.7.1.-]	2.33333	0	0	0	0	0.166667	0	0.333333	0	0.333333
K02745	PTS-Aga-EIIB, agaV; PTS system, N-acetylgalactosamine-specific IIB component [EC:2.7.1.-]	0	0	0	0	0	0.166667	0	0.333333	0	0.333333
K02746	PTS-Aga-EIIC, agaW; PTS system, N-acetylgalactosamine-specific IIC component	0	0	0	0	0	0.166667	0	0.333333	0	0.333333
K02747	PTS-Aga-EIID, agaE; PTS system, N-acetylgalactosamine-specific IID component	0	0	0	0	0	0.166667	0	0.333333	0	0.333333
K02750	PTS-Glv-EIIC, glvC, malP, aglA; PTS system, alpha-glucoside-specific IIC component	2.66667	0	0	0	0	0.166667	0	0.333333	0	0.333333
K02753	PTS-Asc-EIIC, ascF; PTS system, beta-glucoside (arbutin/salicin/cellobiose)-specific IIC component	1.53333	0	0	0	0.2	0.366667	2.53333	4.73333	2.26667	1.4
K02757	PTS-Bgl-EIIC, bglF, bglP; PTS system, beta-glucoside-specific IIC component	7.53333	0	0	0.5	0.2	1.36667	2.53333	6.73333	7.26667	7.81667
K02759	PTS-Cel-EIIA, celC, chbA; PTS system, cellobiose-specific IIA component [EC:2.7.1.196 2.7.1.205]	9.45	0.193333	0.333333	0.176667	0.2	1.36667	2.78333	7.4	7.6	9.445
K02760	PTS-Cel-EIIB, celA, chbB; PTS system, cellobiose-specific IIB component [EC:2.7.1.196 2.7.1.205]	9.65	0.193333	0.333333	0.176667	0.4	1.56667	5.31667	12.8	9.86667	10.845
K02761	PTS-Cel-EIIC, celB, chbC; PTS system, cellobiose-specific IIC component	8.11667	0.193333	0.333333	0.176667	0.2	1.36667	2.78333	8.4	7.6	9.445
K02763	PTS-Dgl-EIIA, gamP; PTS system, D-glucosamine-specific IIA component [EC:2.7.1.-]	1.33333	0	0	0	0	0	0	0	2	0.666667
K02765	PTS-Dgl-EIIC, gamP; PTS system, D-glucosamine-specific IIC component	5.33333	0.666667	3	3.66667	0	4	0	0.333333	5.66667	13.1667
K02768	PTS-Fru-EIIA, fruB; PTS system, fructose-specific IIA component [EC:2.7.1.202]	13.5267	3.19333	0.776667	3.51	1.66667	18.2233	1.91667	2.33333	7.22333	12.35
K02769	PTS-Fru-EIIB, fruA; PTS system, fructose-specific IIB component [EC:2.7.1.202]	0.916667	2.86	0	2.17667	0	20.6667	0.25	0.333333	0	0.711667
K02770	PTS-Fru-EIIC, fruA; PTS system, fructose-specific IIC component	81.7	5.05333	6.66667	7.18667	4.42	31.0333	18.0333	28.7333	22.6	39.74
K02773	PTS-Gat-EIIA, gatA, sgcA; PTS system, galactitol-specific IIA component [EC:2.7.1.200]	5.41667	0	1	0	0	3.16667	1.33333	4.66667	3.33333	10.375
K02774	PTS-Gat-EIIB, gatB, sgcB; PTS system, galactitol-specific IIB component [EC:2.7.1.200]	7.75	0	1	0	0	4	1.33333	7	4.66667	13.375
K02775	PTS-Gat-EIIC, gatC, sgcC; PTS system, galactitol-specific IIC component	3.08333	0	1	0	0	2.16667	1.33333	3	3.33333	7.675
K02777	PTS-Glc-EIIA, crr; PTS system, sugar-specific IIA component [EC:2.7.1.-]	10.7833	2.19333	2	4.84333	0.2	14.7	2.78333	6.4	10.2667	13.945
K02779	PTS-Glc-EIIC, ptsG; PTS system, glucose-specific IIC component	3.7	3.05333	0	2.35333	0.2	22.0333	3.03333	7.4	4.6	4.82333
K02781	PTS-Gut-EIIA, srlB; PTS system, glucitol/sorbitol-specific IIA component [EC:2.7.1.198]	6.28333	0	0	0	0.2	2.36667	3.86667	8.73333	4.93333	7.775
K02782	PTS-Gut-EIIB, srlE; PTS system, glucitol/sorbitol-specific IIB component [EC:2.7.1.198]	0	0	0	0	0	0	0	0	0	0.333333
K02783	PTS-Gut-EIIC, srlA; PTS system, glucitol/sorbitol-specific IIC component	7.9	0	0	0	0.4	2.73333	7.73333	13.4667	7.2	9.55
K02784	PTS-HPR.PTSH, ptsH; phosphocarrier protein HPr	3.78333	1.52667	0	1.17667	0.2	11.7	2.78333	15.7333	3.43333	2.445
K02786	PTS-Lac-EIIA, lacF; PTS system, lactose-specific IIA component [EC:2.7.1.207]	1.33333	0	0	0	0	0	0	1	0	0
K02788	PTS-Lac-EIIC, lacE; PTS system, lactose-specific IIC component	1.33333	0	0	0	0	0	0	1	0	0
K02791	PTS-MalGlc-EIIC, malX; PTS system, maltose/glucose-specific IIC component	2.86667	1.33333	0	1	0.2	10.7	2.53333	5.4	2.26667	2.06667
K02793	PTS-Man-EIIA, manX; PTS system, mannose-specific IIA component [EC:2.7.1.191]	31.3033	3.33333	6.66667	2.33333	8.66667	8	4.83333	6.33333	3.89	23.9583
K02794	PTS-Man-EIIB, manX; PTS system, mannose-specific IIB component [EC:2.7.1.191]	9.2	0	0	0	0.2	0.366667	2.53333	10.7333	5.26667	3.23333
K02795	PTS-Man-EIIC, manY; PTS system, mannose-specific IIC component	6.53333	0	0	0	0.2	0.366667	2.53333	6.73333	4.26667	3.06667
K02796	PTS-Man-EIID, manZ; PTS system, mannose-specific IID component	5.86667	0	0	0	0.2	0.366667	2.53333	10.7333	5.26667	3.06667
K02798	PTS-Mtl-EIIA, mtlA, cmtB; PTS system, mannitol-specific IIA component [EC:2.7.1.197]	5.58333	0.193333	1	0.843333	0	0.166667	0.25	5.33333	4.66667	5.545
K02799	PTS-Mtl-EIIB, mtlA, cmtA; PTS system, mannitol-specific IIB component [EC:2.7.1.197]	0	0	0	0	0	0	0	5.33333	0	0
K02800	PTS-Mtl-EIIC, mtlA, cmtA; PTS system, mannitol-specific IIC component	11.7	2.38667	3.66667	5.02	5.86667	14.8667	3.03333	12.0667	9.26667	20.6567
K02802	PTS-Nag-EIIA, nagE; PTS system, N-acetylglucosamine-specific IIA component [EC:2.7.1.193]	2.33333	0	0	0	0.11	1	0	6.66667	2	3
K02803	PTS-Nag-EIIB, nagE; PTS system, N-acetylglucosamine-specific IIB component [EC:2.7.1.193]	4.66667	0	0	0	0.11	2	0.666667	8.66667	4	6
K02804	PTS-Nag-EIIC, nagE; PTS system, N-acetylglucosamine-specific IIC component	19.7833	2.52667	2.66667	5.17667	2.08667	17.3667	3.95	11.4	18.6	18.2783
K02805	wecE, rffA; dTDP-4-amino-4,6-dideoxygalactose transaminase [EC:2.6.1.59]	22.2	1	0.666667	0	0.2	1.36667	2.53333	6.06667	3.49	5.4
K02806	PTS-Ntr-EIIA, ptsN; PTS system, nitrogen regulatory IIA component [EC:2.7.1.-]	135.613	8.38667	14.8867	12.5767	12.8667	50.3133	34.2	52.7333	44.6033	66.3933
K02810	PTS-Scr-EIIC, scrA, sacP, sacX, ptsS; PTS system, sucrose-specific IIC component	9.53333	0.666667	2	3	0.31	4.2	2.53333	7.73333	4.6	13.5667
K02819	PTS-Tre-EIIC, treB; PTS system, trehalose-specific IIC component	11.7833	0.86	3.66667	3.84333	0.2	4.03333	6.78333	16.4	9.26667	14.445
K02821	PTS-Ula-EIIA, ulaC, sgaA; PTS system, ascorbate-specific IIA component [EC:2.7.1.194]	47.7833	1.52667	6.5	3.17667	1.2	9.03333	15.7833	38.4	25.2667	28.695
K02822	PTS-Ula-EIIB, ulaB, sgaB; PTS system, ascorbate-specific IIB component [EC:2.7.1.194]	3.11667	0.193333	0	0.176667	0.2	0.366667	2.78333	6.06667	3.26667	3.11167
K02823	pyrDII; dihydroorotate dehydrogenase electron transfer subunit	68.1933	3.33333	11.11	11.3333	10.3333	32.5567	2.66667	45.1667	27.78	66.7167
K02824	pyrP, uraA; uracil permease	81.0333	4.86	4	7.17667	5.2	21.3667	12.45	24.5667	25.8233	33.2783
K02825	pyrR; pyrimidine operon attenuation protein / uracil phosphoribosyltransferase [EC:2.4.2.9]	173.887	8	23.5533	17.7233	23.7767	43.72	30.3333	127.5	96.28	129.418
K02826	qoxA; cytochrome aa3-600 menaquinol oxidase subunit II [EC:1.10.3.12]	7.33333	3.66667	2	6	4.66667	9.66667	0	0	2.33333	22.6667
K02827	qoxB; cytochrome aa3-600 menaquinol oxidase subunit I [EC:1.10.3.12]	8	3.66667	2	6	4.66667	9.66667	0	0	2.33333	23.5
K02828	qoxC; cytochrome aa3-600 menaquinol oxidase subunit III [EC:1.10.3.12]	7.33333	3.66667	2	6	4.66667	9.66667	0	0	2.33333	22.3333
K02829	qoxD; cytochrome aa3-600 menaquinol oxidase subunit IV [EC:1.10.3.12]	7.33333	3.66667	2	6	4.66667	9.66667	0	0	2.33333	22.3333
K02834	rbfA; ribosome-binding factor A	236.723	12.86	28.3867	24.79	32.6433	67.0333	42.1167	151.233	105.66	154.537
K02835	prfA, MTRF1, MRF1; peptide chain release factor 1	236.723	12.86	28.3867	24.5667	32.6433	67.0333	41.6167	147.233	105.66	154.815
K02836	prfB; peptide chain release factor 2	236.723	12.86	28.3867	24.79	32.6433	67.0333	41.6167	151.233	105.66	154.815
K02837	prfC; peptide chain release factor 3	174.613	11.1933	17.9433	13.2333	20.2	38.9767	41.95	90.7333	62.9367	91.6483
K02838	frr, MRRF, RRF; ribosome recycling factor	236.057	12.86	28.3867	24.5667	32.6433	67.0333	41.6167	151.233	105.66	154.315
K02839	prfH; peptide chain release factor	2.66667	0	0	0.223333	0	0.166667	0	5.33333	0.833333	6.33333
K02841	waaC, rfaC; heptosyltransferase I [EC:2.4.-.-]	62.81	1.66667	12.11	4.33333	3.53333	15.7567	25.2	47.7333	39.7133	45.7617
K02843	waaF, rfaF; heptosyltransferase II [EC:2.4.-.-]	69.4467	1.19333	7.66333	4.51	14.5333	19.59	14.1167	30.4	37.16	43.89
K02844	waaG, rfaG; UDP-glucose:(heptosyl)LPS alpha-1,3-glucosyltransferase [EC:2.4.1.-]	23.9767	0.333333	2.44333	0.666667	0.2	4.25667	12.2	17.4	12.49	7.56667
K02846	solA; N-methyl-L-tryptophan oxidase [EC:1.5.3.-]	0.866667	0	0	0	0.2	0.366667	2.53333	4.73333	2.26667	1.4
K02847	waaL, rfaL; O-antigen ligase [EC:2.4.1.-]	28.95	2.66667	5.16667	4	0.2	14.7	16.8667	33.4	14.2667	13.6917
K02848	waaP, rfaP; heptose I phosphotransferase [EC:2.7.1.-]	23.11	0.333333	2.44333	0.666667	0	3.89	9.66667	12.6667	10.2233	5.83333
K02849	waaQ, rfaQ; heptosyltransferase III [EC:2.4.-.-]	8.53333	0	0.666667	0.666667	2.86667	2.53333	2.53333	4.73333	2.26667	5.9
K02850	waaY, rfaY; heptose II phosphotransferase [EC:2.7.1.-]	0	0	0	0	0	0.5	0	0	0	0
K02851	wecA, tagO, rfe; UDP-GlcNAc:undecaprenyl-phosphate/decaprenyl-phosphate GlcNAc-1-phosphate transferase [EC:2.7.8.33 2.7.8.35]	97.37	9	9.77667	13.2033	18.9533	57.1233	17.4	89.3	33.37	84.2867
K02852	wecG, rffM; UDP-N-acetyl-D-mannosaminouronate:lipid I N-acetyl-D-mannosaminouronosyltransferase [EC:2.4.1.180]	0.866667	0	0	0	0.2	0.366667	2.53333	4.73333	2.26667	1.4
K02853	wzyE, rffT; enterobacterial common antigen polymerase [EC:2.4.1.-]	0.866667	0	0	0	0.2	0.366667	2.53333	4.73333	2.26667	1.4
K02854	rhaR; AraC family transcriptional regulator, L-rhamnose operon transcriptional activator RhaR	0.666667	0	0	0	0	0.166667	0	0.333333	0	0
K02855	rhaS; AraC family transcriptional regulator, L-rhamnose operon regulatory protein RhaS	4.66667	0	0	0	0	0.166667	0	0.666667	6	1.66667
K02856	rhaT; L-rhamnose-H+ transport protein	0	0	0	0	1.33333	0.833333	0	0.333333	2.55667	0.666667
K02858	ribB, RIB3; 3,4-dihydroxy 2-butanone 4-phosphate synthase [EC:4.1.99.12]	24.7833	4.19333	4.66667	4.17667	0.2	16.0333	12.1167	29.7333	17.2667	22.2783
K02859	ribT; riboflavin biosynthesis RibT protein	3	2.33333	2	4.66667	2.33333	7	0	0	2.33333	14.5
K02860	rimM; 16S rRNA processing protein RimM	229.78	12.5267	25.61	23.5667	30.9767	60.1433	39.95	146.567	92.77	150.565
K02862	ctaG; putative membrane protein	14.3333	2.33333	2	5.33333	2.33333	7	0	5.66667	8.16667	18.6667
K02863	RP-L1, MRPL1, rplA; large subunit ribosomal protein L1	236.723	12.86	28.3867	24.5667	32.6433	67.0333	41.6167	152.233	105.66	155.315
K02864	RP-L10, MRPL10, rplJ; large subunit ribosomal protein L10	236.723	12.86	28.3867	24.5667	32.6433	67.0333	41.6167	152.233	105.66	154.815
K02866	RP-L10e, RPL10; large subunit ribosomal protein L10e	0	0	0	0	0	0	0	1	0	0.5
K02867	RP-L11, MRPL11, rplK; large subunit ribosomal protein L11	236.723	12.86	28.3867	24.5667	32.6433	67.0333	41.6167	152.233	105.66	155.315
K02869	RP-L12, rpl12; large subunit ribosomal protein L12	0	0	0	0	0	0	0	1	0	0.5
K02871	RP-L13, MRPL13, rplM; large subunit ribosomal protein L13	236.723	12.86	28.3867	24.5667	32.6433	67.0333	41.6167	152.233	105.66	155.315
K02874	RP-L14, MRPL14, rplN; large subunit ribosomal protein L14	236.723	12.86	28.3867	24.5667	32.6433	67.0333	41.6167	152.233	105.66	155.315
K02875	RP-L14e, RPL14; large subunit ribosomal protein L14e	0	0	0	0	0	0	0	0	0	0.5
K02876	RP-L15, MRPL15, rplO; large subunit ribosomal protein L15	236.723	12.86	28.3867	24.5667	32.6433	67.0333	41.6167	152.233	105.66	155.315
K02877	RP-L15e, RPL15; large subunit ribosomal protein L15e	0	0	0	0	0	0	0	1	0	0.5
K02878	RP-L16, MRPL16, rplP; large subunit ribosomal protein L16	236.723	12.86	28.3867	24.5667	32.6433	67.0333	41.6167	151.233	105.66	154.815
K02879	RP-L17, MRPL17, rplQ; large subunit ribosomal protein L17	236.723	12.86	28.3867	24.5667	32.6433	67.0333	41.6167	151.233	105.66	154.815
K02881	RP-L18, MRPL18, rplR; large subunit ribosomal protein L18	236.723	12.86	28.3867	24.5667	32.6433	67.0333	41.6167	152.233	105.66	155.315
K02883	RP-L18e, RPL18; large subunit ribosomal protein L18e	0	0	0	0	0	0	0	1	0	0.5
K02884	RP-L19, MRPL19, rplS; large subunit ribosomal protein L19	236.723	12.86	28.3867	24.5667	32.6433	67.0333	41.6167	151.233	105.66	154.815
K02885	RP-L19e, RPL19; large subunit ribosomal protein L19e	0	0	0	0	0	0	0	1	0	0.5
K02886	RP-L2, MRPL2, rplB; large subunit ribosomal protein L2	237.39	12.86	28.3867	24.5667	32.6433	67.0333	41.6167	152.233	105.66	155.315
K02887	RP-L20, MRPL20, rplT; large subunit ribosomal protein L20	236.057	12.86	28.3867	24.5667	32.6433	67.0333	41.6167	147.233	105.66	154.815
K02888	RP-L21, MRPL21, rplU; large subunit ribosomal protein L21	236.057	12.86	28.3867	24.5667	32.6433	67.0333	41.6167	151.233	105.66	154.815
K02889	RP-L21e, RPL21; large subunit ribosomal protein L21e	0	0	0	0	0	0	0	1	0	0.5
K02890	RP-L22, MRPL22, rplV; large subunit ribosomal protein L22	230.723	12.86	28.3867	23.9	32.6433	67.0333	41.6167	152.233	105.66	153.148
K02892	RP-L23, MRPL23, rplW; large subunit ribosomal protein L23	236.723	12.86	28.3867	24.5667	32.6433	67.0333	41.6167	152.233	105.66	155.315
K02895	RP-L24, MRPL24, rplX; large subunit ribosomal protein L24	236.057	12.86	28.3867	24.5667	32.6433	67.0333	41.6167	152.233	105.66	155.315
K02896	RP-L24e, RPL24; large subunit ribosomal protein L24e	0	0	0	0	0	0	0	1	0	0.5
K02897	RP-L25, rplY; large subunit ribosomal protein L25	235.057	12.86	27.3867	24.5667	32.6433	65.7	41.6167	150.233	105.437	149.482
K02899	RP-L27, MRPL27, rpmA; large subunit ribosomal protein L27	236.057	12.86	28.3867	24.5667	32.6433	67.0333	41.6167	151.233	105.66	154.815
K02902	RP-L28, MRPL28, rpmB; large subunit ribosomal protein L28	244.057	14.5267	28.3867	26.2333	36.0867	72.0333	43.2833	164.233	109.993	162.648
K02904	RP-L29, rpmC; large subunit ribosomal protein L29	236.723	12.86	28.3867	24.5667	32.6433	67.0333	41.6167	152.233	105.66	155.093
K02906	RP-L3, MRPL3, rplC; large subunit ribosomal protein L3	236.723	12.86	28.3867	24.5667	32.6433	67.0333	41.6167	152.233	105.66	155.315
K02907	RP-L30, MRPL30, rpmD; large subunit ribosomal protein L30	207.53	11.5267	27.61	24.5667	31.6433	59.1433	37.2833	128.567	100.437	146.732
K02908	RP-L30e, RPL30; large subunit ribosomal protein L30e	0	0	0	0	0	0	0	1	0	0.5
K02909	RP-L31, rpmE; large subunit ribosomal protein L31	244.173	14.3867	28.3867	25.7433	34.0633	78.7333	46.0667	168.967	109.927	160.093
K02910	RP-L31e, RPL31; large subunit ribosomal protein L31e	0	0	0	0	0	0	0	1	0	0.5
K02911	RP-L32, MRPL32, rpmF; large subunit ribosomal protein L32	236.057	12.86	28.3867	24.5667	32.7533	67.0333	41.6167	155.9	106.327	154.315
K02912	RP-L32e, RPL32; large subunit ribosomal protein L32e	0	0	0	0	0	0	0	1	0	0.5
K02913	RP-L33, MRPL33, rpmG; large subunit ribosomal protein L33	244.723	13.1933	26.72	23.4567	33.7533	69.3667	43.2833	165.233	109.993	159.815
K02914	RP-L34, MRPL34, rpmH; large subunit ribosomal protein L34	180.03	6.19333	15.2767	15.9	28.6433	49.4767	23.95	104.233	87.77	114.69
K02915	RP-L34e, RPL34; large subunit ribosomal protein L34e	0	0	0	0	0	0	0	0	0	0
K02916	RP-L35, MRPL35, rpmI; large subunit ribosomal protein L35	236.057	12.86	28.3867	24.5667	32.6433	67.0333	41.6167	147.233	105.66	154.315
K02919	RP-L36, MRPL36, rpmJ; large subunit ribosomal protein L36	185.813	10.86	18.9433	16.5667	29.51	63.79	28.9833	89.6333	74.37	117.603
K02921	RP-L37Ae, RPL37A; large subunit ribosomal protein L37Ae	0	0	0	0	0	0	0	1	0	0.5
K02922	RP-L37e, RPL37; large subunit ribosomal protein L37e	0	0	0	0	0	0	0	1	0	0.5
K02924	RP-L39e, RPL39; large subunit ribosomal protein L39e	0	0	0	0	0	0	0	1	0	0.5
K02926	RP-L4, MRPL4, rplD; large subunit ribosomal protein L4	236.723	12.86	28.3867	24.5667	32.6433	67.0333	41.6167	151.233	105.66	154.815
K02927	RP-L40e, RPL40; large subunit ribosomal protein L40e	0	0	0	0	0	0	0	1	0	0.5
K02929	RP-L44e, RPL44; large subunit ribosomal protein L44e	0	0	0	0	0	0	0	1	0	0.5
K02930	RP-L4e, RPL4; large subunit ribosomal protein L4e	0	0	0	0	0	0	0	1	0	0.5
K02931	RP-L5, MRPL5, rplE; large subunit ribosomal protein L5	236.723	12.86	28.3867	24.5667	32.6433	67.0333	41.6167	152.233	105.66	155.315
K02933	RP-L6, MRPL6, rplF; large subunit ribosomal protein L6	236.723	12.86	28.3867	24.5667	32.6433	67.0333	41.6167	152.233	105.66	155.315
K02935	RP-L7, MRPL12, rplL; large subunit ribosomal protein L7/L12	215.39	11.86	28.3867	24.5667	32.6433	66.0333	41.6167	151.233	105.66	150.815
K02936	RP-L7Ae, RPL7A; large subunit ribosomal protein L7Ae	0	0	0	0	0	0	0	1	0	0.5
K02939	RP-L9, MRPL9, rplI; large subunit ribosomal protein L9	236.723	12.86	28.3867	24.5667	32.6433	67.0333	41.6167	151.233	105.66	154.815
K02944	RP-LX, rplX; large subunit ribosomal protein LX	0	0	0	0	0	0	0	1	0	0.5
K02945	RP-S1, rpsA; small subunit ribosomal protein S1	264.5	14.1933	27.83	24.0133	32.0867	72.2567	45.95	165.733	111.993	166.898
K02946	RP-S10, MRPS10, rpsJ; small subunit ribosomal protein S10	236.723	12.86	28.3867	24.5667	32.6433	67.0333	41.6167	152.233	105.66	155.315
K02948	RP-S11, MRPS11, rpsK; small subunit ribosomal protein S11	236.723	12.86	28.3867	24.5667	32.6433	67.0333	41.6167	151.9	105.66	155.315
K02950	RP-S12, MRPS12, rpsL; small subunit ribosomal protein S12	236.723	12.86	28.3867	24.5667	32.6433	67.0333	41.6167	152.233	105.66	155.315
K02952	RP-S13, rpsM; small subunit ribosomal protein S13	233.723	12.86	28.0533	24.5667	32.6433	65.3667	40.2833	151.233	105.327	154.315
K02954	RP-S14, MRPS14, rpsN; small subunit ribosomal protein S14	243.057	12.86	29.3867	24.5667	33.7533	68.0333	41.6167	165.233	107.66	161.093
K02956	RP-S15, MRPS15, rpsO; small subunit ribosomal protein S15	233.723	12.86	28.0533	24.5667	32.6433	65.3667	40.2833	151.233	105.327	154.315
K02959	RP-S16, MRPS16, rpsP; small subunit ribosomal protein S16	225.39	11.5267	23.72	21.5667	32.6433	63.3667	32.2833	126.9	96.9933	143.815
K02961	RP-S17, MRPS17, rpsQ; small subunit ribosomal protein S17	236.723	12.86	28.3867	23.9	32.6433	67.0333	41.6167	152.233	105.66	154.982
K02962	RP-S17e, RPS17; small subunit ribosomal protein S17e	0	0	0	0	0	0	0	1	0	0.5
K02963	RP-S18, MRPS18, rpsR; small subunit ribosomal protein S18	239.39	12.86	28.3867	24.5667	33.7533	67.0333	42.6167	156.9	105.66	156.482
K02965	RP-S19, rpsS; small subunit ribosomal protein S19	236.723	12.86	28.3867	24.5667	32.6433	67.0333	41.6167	152.233	105.66	155.315
K02966	RP-S19e, RPS19; small subunit ribosomal protein S19e	0	0	0	0	0	0	0	1	0	0.5
K02967	RP-S2, MRPS2, rpsB; small subunit ribosomal protein S2	236.057	12.86	28.3867	24.5667	32.6433	67.0333	41.6167	152.233	105.66	155.315
K02968	RP-S20, rpsT; small subunit ribosomal protein S20	225.39	11.5267	23.72	21.5667	32.6433	63.3667	32.2833	127.233	96.9933	144.148
K02970	RP-S21, MRPS21, rpsU; small subunit ribosomal protein S21	206.89	13.5267	28.3867	22.4	26.8667	55.3667	41.2833	103.567	102.66	129.703
K02972	sra; stationary-phase-induced ribosome-associated protein	0	0	0	0	0	0.166667	0	0.333333	0	0
K02974	RP-S24e, RPS24; small subunit ribosomal protein S24e	0	0	0	0	0	0	0	1	0	0.5
K02975	RP-S25e, RPS25; small subunit ribosomal protein S25e	0	0	0	0	0	0	0	0	0	0.5
K02976	RP-S26e, RPS26; small subunit ribosomal protein S26e	0	0	0	0	0	0	0	0	0	0.5
K02977	RP-S27Ae, RPS27A; small subunit ribosomal protein S27Ae	0	0	0	0	0	0	0	1	0	0.5
K02978	RP-S27e, RPS27; small subunit ribosomal protein S27e	0	0	0	0	0	0	0	1	0	0.5
K02979	RP-S28e, RPS28; small subunit ribosomal protein S28e	0	0	0	0	0	0	0	1	0	0.5
K02982	RP-S3, rpsC; small subunit ribosomal protein S3	237.39	12.86	28.3867	24.5667	32.6433	67.0333	41.6167	152.233	105.66	155.315
K02983	RP-S30e, RPS30; small subunit ribosomal protein S30e	0	0	0	0	0	0	0	0	0	0.5
K02984	RP-S3Ae, RPS3A; small subunit ribosomal protein S3Ae	0	0	0	0	0	0	0	1	0	0.5
K02986	RP-S4, rpsD; small subunit ribosomal protein S4	245.89	12.86	28.3867	24.79	33.9767	67.0333	42.2833	157.567	106.66	158.62
K02987	RP-S4e, RPS4; small subunit ribosomal protein S4e	0	0	0	0	0	0	0	1	0	0.5
K02988	RP-S5, MRPS5, rpsE; small subunit ribosomal protein S5	236.723	12.86	28.3867	24.5667	32.6433	67.0333	41.6167	152.233	105.66	155.315
K02990	RP-S6, MRPS6, rpsF; small subunit ribosomal protein S6	236.723	12.86	28.3867	24.5667	32.6433	64.3667	41.6167	151.233	105.66	153.427
K02991	RP-S6e, RPS6; small subunit ribosomal protein S6e	0	0	0	0	0	0	0	1	0	0.5
K02992	RP-S7, MRPS7, rpsG; small subunit ribosomal protein S7	236.723	12.86	28.3867	24.5667	32.6433	67.0333	41.6167	152.233	105.66	155.315
K02994	RP-S8, rpsH; small subunit ribosomal protein S8	236.723	12.86	28.3867	24.5667	32.6433	67.0333	41.6167	152.233	105.66	155.315
K02995	RP-S8e, RPS8; small subunit ribosomal protein S8e	0	0	0	0	0	0	0	1	0	0.5
K02996	RP-S9, MRPS9, rpsI; small subunit ribosomal protein S9	236.723	12.86	28.3867	24.5667	32.6433	67.0333	41.6167	152.233	105.66	155.093
K03014	RPB6, POLR2F; DNA-directed RNA polymerases I, II, and III subunit RPABC2	0	0	0	0	0	0	0	0	0	0
K03040	rpoA; DNA-directed RNA polymerase subunit alpha [EC:2.7.7.6]	239.667	13.1933	29.1633	24.5667	33.6433	73.9233	44.95	151.233	107.883	159.065
K03041	rpoA1; DNA-directed RNA polymerase subunit A' [EC:2.7.7.6]	0	0	0	0	0	0	0	1	0	0.5
K03042	rpoA2; DNA-directed RNA polymerase subunit A" [EC:2.7.7.6]	0	0	0	0	0	0	0	1	0	0.5
K03043	rpoB; DNA-directed RNA polymerase subunit beta [EC:2.7.7.6]	236.723	12.86	28.3867	24.5667	32.6433	67.0333	41.6167	151.233	105.66	154.815
K03044	rpoB1; DNA-directed RNA polymerase subunit B' [EC:2.7.7.6]	0	0	0	0	0	0	0	0	0	0
K03045	rpoB2; DNA-directed RNA polymerase subunit B" [EC:2.7.7.6]	0	0	0	0	0	0	0	0	0	0
K03046	rpoC; DNA-directed RNA polymerase subunit beta' [EC:2.7.7.6]	258.057	13.86	28.3867	24.5667	32.6433	68.0333	45.2833	171.9	108.66	159.482
K03047	rpoD; DNA-directed RNA polymerase subunit D [EC:2.7.7.6]	0	0	0	0	0	0	0	1	0	0.5
K03048	rpoE; DNA-directed RNA polymerase subunit delta	7.66667	2.33333	2	5.33333	2.33333	7	0	1	7	16.6667
K03049	rpoE1; DNA-directed RNA polymerase subunit E' [EC:2.7.7.6]	0	0	0	0	0	0	0	1	0	0.5
K03050	rpoE2; DNA-directed RNA polymerase subunit E" [EC:2.7.7.6]	0	0	0	0	0	0	0	1	0	0.5
K03051	rpoF; DNA-directed RNA polymerase subunit F [EC:2.7.7.6]	0	0	0	0	0	0	0	1	0	0.5
K03053	rpoH; DNA-directed RNA polymerase subunit H [EC:2.7.7.6]	0	0	0	0	0	0	0	1	0	0.5
K03055	rpoK; DNA-directed RNA polymerase subunit K [EC:2.7.7.6]	0	0	0	0	0	0	0	1	0	0.5
K03056	rpoL; DNA-directed RNA polymerase subunit L [EC:2.7.7.6]	0	0	0	0	0	0	0	1	0	0.5
K03057	tfs; transcription termination factor TFS	0	0	0	0	0	0	0	1	0	0.5
K03058	rpoN; DNA-directed RNA polymerase subunit N [EC:2.7.7.6]	0	0	0	0	0	0	0	1	0	0.5
K03059	rpoP; DNA-directed RNA polymerase subunit P [EC:2.7.7.6]	0	0	0	0	0	0	0	1	0	0.5
K03060	rpoZ; DNA-directed RNA polymerase subunit omega [EC:2.7.7.6]	199.863	11.86	19.9433	16.5667	26.31	56.09	39.95	113.567	73.27	120.32
K03070	secA; preprotein translocase subunit SecA	250.5	14.86	30.1633	28.4	36.9767	77.9233	44.2833	157.567	110.217	172.982
K03071	secB; preprotein translocase subunit SecB	114.863	6.86	12.5	6.51	10.8667	26.5333	29.2833	47.4	37.49	46.82
K03072	secD; preprotein translocase subunit SecD	214.143	10.72	23.5	20.0767	26.9767	60.7	37.2	137.567	83.3233	119.157
K03073	secE; preprotein translocase subunit SecE	224.473	12.86	28.3867	23.5667	32.6433	66.0333	41.6167	137.9	104.327	149.427
K03074	secF; preprotein translocase subunit SecF	214.143	10.72	23.5	20.0767	26.9767	60.7	37.2	137.567	83.3233	118.823
K03075	secG; preprotein translocase subunit SecG	230.39	12.86	26.3867	23.9	32.6433	64.7	36.2833	138.567	99.3267	150.982
K03076	secY; preprotein translocase subunit SecY	238.057	12.86	28.3867	24.5667	32.6433	67.0333	41.6167	152.233	105.66	155.315
K03077	araD, ulaF, sgaE, sgbE; L-ribulose-5-phosphate 4-epimerase [EC:5.1.3.4]	2.25	0.193333	1.66667	0.176667	0	0.166667	0.25	5.66667	5	1.845
K03078	ulaD, sgaH, sgbH; 3-dehydro-L-gulonate-6-phosphate decarboxylase [EC:4.1.1.85]	2.33333	0	0	0	0	1.16667	0	2.33333	1.33333	3
K03079	ulaE, sgaU, sgbU; L-ribulose-5-phosphate 3-epimerase [EC:5.1.3.22]	2.33333	0	0	0	0	1.33333	0	2.33333	2.33333	3
K03086	rpoD; RNA polymerase primary sigma factor	420.05	16.1933	44.7133	39.3467	55.7533	132.54	60.6167	323.233	166.003	271.96
K03087	rpoS; RNA polymerase nonessential primary-like sigma factor	159.617	7.19333	8	8.01	4.86667	32.3667	30.7833	112.4	39.6	47.695
K03088	rpoE; RNA polymerase sigma-70 factor, ECF subfamily	1699.63	98.1067	230.7	183.273	254.367	468.433	319.6	1041.03	729.38	1207.54
K03089	rpoH; RNA polymerase sigma-32 factor	145.613	11.5267	17.5	8.62333	14.8667	30.5333	33.1167	47.4	39.38	68.2783
K03090	sigB; RNA polymerase sigma-B factor	120	3.33333	9.33333	13.3333	25.5467	22.6667	8.33333	70.3333	16.3333	86.5
K03091	sigH; RNA polymerase sporulation-specific sigma factor	85.3333	11.6667	12.3333	29	24.3333	43.6667	0	42.8333	44.89	110.5
K03092	rpoN; RNA polymerase sigma-54 factor	179.557	10.5267	22.8867	18.0667	24.8667	49.0333	39.95	77.2333	96.16	116.648
K03093	sigI; RNA polymerase sigma factor	8.11	1	2.44333	3.66667	2.66667	7.22333	1.66667	6.16667	7.89	11.805
K03095	sprL; SprT-like protein	7.66667	2.33333	2	5.33333	2.33333	7	0	1	7	16.6667
K03098	APOD; apolipoprotein D and lipocalin family protein	126.867	2.86	7.66667	5.51	2.86667	23.0333	37.45	62.7333	36.2667	30.32
K03100	lepB; signal peptidase I [EC:3.4.21.89]	332.833	21.1933	41.72	43.3467	47.9733	93.0333	66.1167	234.233	140.05	235.172
K03101	lspA; signal peptidase II [EC:3.4.23.36]	265.833	13.86	28.83	24.79	34.6433	68.81	44.2833	151.233	107.993	159.038
K03105	SRP19; signal recognition particle subunit SRP19	0	0	0	0	0	0	0	1	0	0.5
K03106	SRP54, ffh; signal recognition particle subunit SRP54 [EC:3.6.5.4]	237.39	12.86	28.3867	23.9	32.6433	67.0333	41.6167	148.233	105.66	154.815
K03110	ftsY; fused signal recognition particle receptor	236.723	12.86	28.3867	23.9	32.6433	67.0333	41.6167	148.233	105.66	154.815
K03111	ssb; single-strand DNA-binding protein	323.717	21.1933	43.4933	39.9567	58.0867	96.64	52.6167	243.9	153.717	234.512
K03112	damX; DamX protein	44.45	1.52667	2	1.84333	1.86667	13.0333	12.45	17.4	10.2667	6.945
K03113	EIF1, SUI1; translation initiation factor 1	89.5033	5.19333	9.22	4.84333	6.2	25.0333	26.7833	63.4	46.38	38.9183
K03116	tatA; sec-independent protein translocase protein TatA	286.86	16.1933	32.2733	26.9	37.53	78.8667	48.2833	176.067	127.05	180.738
K03117	tatB; sec-independent protein translocase protein TatB	142.42	7.52667	15.5	9.56667	18.9767	33.7	30.95	78.0667	56.3233	82.9867
K03118	tatC; sec-independent protein translocase protein TatC	238.64	12.86	28.0533	22.9	32.6433	64.7	41.6167	146.233	103.437	154.682
K03119	tauD; taurine dioxygenase [EC:1.14.11.17]	88.9767	1.33333	13	5	6.42	25.7	36.3667	83.7333	41.9333	63.7333
K03120	TBP, tbp; transcription initiation factor TFIID TATA-box-binding protein	0	0	0	0	0	0	0	1	0	0.5
K03124	TFIIB, GTF2B, SUA7, tfb; transcription initiation factor TFIIB	0	0	0	0	0	0	0	1	0	1.5
K03136	TFIIE1, GTF2E1, TFA1, tfe; transcription initiation factor TFIIE subunit alpha	0	0	0	0	0	0	0	0	0	0.5
K03146	THI4, THI1; cysteine-dependent adenosine diphosphate thiazole synthase [EC:2.4.2.60]	0.25	0	0	0	0	0	0	0	0	1
[truncated: 4,924 more rows]

## Sheet: Pathways
pathway	description	Egg	1dph	3dph	5dph	7dph	10dph	12dph	20dph	25dph	Gut
1CMET2-PWY	N10-formyl-tetrahydrofolate biosynthesis	221.791	12.5936	24.1478	19.3315	29.7374	64.2166	46.7371	126.357	100.668	137.855
3-HYDROXYPHENYLACETATE-DEGRADATION-PWY	4-hydroxyphenylacetate degradation	28.2357	0	2.91642	0.892172	1.88722	6.02849	9.5874	22.4138	12.5733	21.9906
AEROBACTINSYN-PWY	aerobactin biosynthesis	0	0	0	0	0	0	0	0	0	0.641026
ALL-CHORISMATE-PWY	superpathway of chorismate metabolism	61.8765	0	0	0	7.9807	8.9408	12.0006	63.1178	25.391	48.2155
ANAEROFRUCAT-PWY	homolactic fermentation	209.789	10.4562	25.7413	20.9515	24.6977	52.7601	37.7685	158.947	89.8209	142.639
ANAGLYCOLYSIS-PWY	glycolysis III (from glucose)	273.348	13.7917	31.5923	27.1051	35.8043	71.8545	46.0555	187.374	121.427	177.082
ARG+POLYAMINE-SYN	superpathway of arginine and polyamine biosynthesis	116.113	7.29046	13.9294	11.9248	15.8921	26.8519	26.0585	67.011	44.1118	73.0689
ARGDEG-PWY	superpathway of L-arginine, putrescine, and 4-aminobutanoate degradation	4.32594	0	0	0	0.452146	0.981933	6.83936	12.7511	4.93768	4.24092
ARGORNPROST-PWY	arginine, ornithine and proline interconversion	63.9578	2.14963	6.45264	3.47947	10.5889	19.0661	14.8323	34.4202	22.7731	43.528
ARGSYNBSUB-PWY	L-arginine biosynthesis II (acetyl cycle)	258.233	14.4485	31.5668	27.7397	35.3426	75.3175	46.7922	165.376	107.71	166.399
ARGSYN-PWY	L-arginine biosynthesis I (via L-ornithine)	242.655	13.15	28.5378	25.2888	34.0409	68.6655	43.3838	152.495	99.6334	153.942
ARO-PWY	chorismate biosynthesis I	276.665	14.6807	31.6444	26.6188	35.5162	77.1305	49.591	167.801	115.727	174.296
ASPASN-PWY	superpathway of L-aspartate and L-asparagine biosynthesis	91.3108	7.23478	6.73739	6.87047	5.00663	27.6256	20.9025	52.7201	39.6041	51.6207
AST-PWY	L-arginine degradation II (AST pathway)	77.3083	2.92446	8.39701	5.35982	3.78945	19.5276	24.8639	46.9913	30.461	26.9035
BIOTIN-BIOSYNTHESIS-PWY	biotin biosynthesis I	176.834	7.90507	17.7181	10.5782	9.81336	41.2288	43.7164	85.489	68.037	74.9601
BRANCHED-CHAIN-AA-SYN-PWY	superpathway of branched amino acid biosynthesis	350.937	19.6064	45.1115	35.6587	50.6112	97.6547	63.434	233.538	153.255	232.9
CALVIN-PWY	Calvin-Benson-Bassham cycle	264.419	13.691	29.7478	26.203	35.1804	72.541	46.7365	175.176	119.951	173.286
CATECHOL-ORTHO-CLEAVAGE-PWY	catechol degradation to &beta;-ketoadipate	55.1749	1.7931	7.54594	4.28175	0.197099	10.075	20.5964	41.347	25.9194	28.6804
CENTFERM-PWY	pyruvate fermentation to butanoate	10.5276	1.08429	4.04692	5.43243	0	8.42621	0	0	12.9368	26.3914
CHLOROPHYLL-SYN	chlorophyllide a biosynthesis I (aerobic, light-dependent)	9.92376	1.57375	0	0	0	1.98721	3.8356	28.3089	4.84058	8.33942
COA-PWY	coenzyme A biosynthesis I	241.956	13.3051	30.0343	25.7676	33.602	72.1916	45.2928	158.266	109.08	159.656
COBALSYN-PWY	adenosylcobalamin salvage from cobinamide I	126.083	8.45815	17.0361	14.6485	22.2094	42.4378	28.6473	101.392	57.4746	98.1493
CODH-PWY	reductive acetyl coenzyme A pathway	27.0031	0	6.56598	5.06393	2.07407	5.94732	0	27.4959	14.2623	19.646
COLANSYN-PWY	colanic acid building blocks biosynthesis	171.514	7.86974	17.0777	10.5468	17.9339	44.5909	38.1713	110.78	73.1844	97.1735
COMPLETE-ARO-PWY	superpathway of aromatic amino acid biosynthesis	293.145	15.5887	33.5066	28.1207	37.4465	81.5266	52.6133	178.072	122.898	184.035
CRNFORCAT-PWY	creatinine degradation I	26.7929	0	0.937708	0	0	5.69965	5.08504	2.7802	6.30676	8.68586
DAPLYSINESYN-PWY	L-lysine biosynthesis I	246.761	13.1758	27.7972	24.8578	33.1636	71.0312	49.4485	143.173	94.686	157.184
DENITRIFICATION-PWY	nitrate reduction I (denitrification)	29.764	0	2.57192	0.761905	0	2.83556	7.10427	17.0078	11.1271	11.3415
DENOVOPURINE2-PWY	superpathway of purine nucleotides de novo biosynthesis II	144.309	10.0004	23.5558	18.9576	6.20241	52.5491	40.3096	128.059	94.6198	118.869
DHGLUCONATE-PYR-CAT-PWY	glucose degradation (oxidative)	29.2553	1.78042	8.2649	4.43311	0	9.5882	14.2529	25.5435	16.3606	23.6126
DTDPRHAMSYN-PWY	dTDP-L-rhamnose biosynthesis I	259.361	10.8855	29.0754	22.0814	30.3895	62.9618	43.8446	177.618	121.233	151.862
ECASYN-PWY	enterobacterial common antigen biosynthesis	1.60405	0	0	0	0.362087	0.712347	3.75979	8.17575	3.43955	2.7238
ENTBACSYN-PWY	enterobactin biosynthesis	83.0294	1.42751	0	7.05259	10.0116	12.455	15.5649	48.6049	16.1075	46.0694
FAO-PWY	fatty acid &beta;-oxidation I	348.408	18.2909	44.3242	32.9719	50.2559	105.073	73.3838	193.284	121.546	216.077
FASYN-ELONG-PWY	fatty acid elongation -- saturated	323.255	23.2597	43.2351	31.9797	50.3173	106.018	70.2216	150.307	137.68	206.364
FASYN-INITIAL-PWY	superpathway of fatty acid biosynthesis initiation (E. coli)	208.116	12.9375	20.845	12.0683	21.2321	55.6739	52.2709	95.6394	74.1141	95.221
FERMENTATION-PWY	mixed acid fermentation	193.525	11.1375	21.4471	16.4235	15.0169	49.2018	49.2034	128.624	66.3344	104.391
FOLSYN-PWY	superpathway of tetrahydrofolate biosynthesis and salvage	225.01	13.1623	25.776	21.8962	29.745	64.9814	45.6721	127.745	102.908	142.98
FUCCAT-PWY	fucose degradation	3.97172	0	0	0	0	0.31977	0	0	2.27218	6.87982
FUC-RHAMCAT-PWY	superpathway of fucose and rhamnose degradation	2.22807	0	0	0	0	0.289981	0	0	0.762319	1.85415
GALACTARDEG-PWY	D-galactarate degradation I	12.1071	0	2.2364	0	0.343953	1.51741	4.2557	7.83967	9.42697	11.9653
GALACT-GLUCUROCAT-PWY	superpathway of hexuronide and hexuronate degradation	28.1918	0	1.46334	4.39835	8.39359	7.72332	3.41478	10.3633	13.0071	24.9575
GALACTUROCAT-PWY	D-galacturonate degradation I	47.3522	6.8803	7.73863	7.59602	14.2726	21.6625	9.89561	17.2575	23.6095	48.6204
GALLATE-DEGRADATION-II-PWY	gallate degradation I	4.83819	0	0.533333	0	0	2	2.66667	6.33333	1.73333	1.39003
GALLATE-DEGRADATION-I-PWY	gallate degradation II	4.83819	0	0.533333	0	0	2	2.66667	6.33333	2.0303	3.12903
GLCMANNANAUT-PWY	superpathway of N-acetylglucosamine, N-acetylmannosamine and N-acetylneuraminate degradation	8.64196	0.724839	4.31371	0	1.08966	5.04955	3.4411	2.76087	4.93898	10.1624
GLUCARDEG-PWY	D-glucarate degradation I	12.3626	0	2.9811	0	0.494981	1.85302	4.20683	8.57624	11.9907	14.1946
GLUCARGALACTSUPER-PWY	superpathway of D-glucarate and D-galactarate degradation	12.1071	0	2.2364	0	0.343953	1.51741	4.2557	7.83967	9.42697	11.9653
GLUCONEO-PWY	gluconeogenesis I	249.762	14.0776	27.92	23.0481	33.4215	67.7224	45.1939	163.159	110.314	156.575
GLUCOSE1PMETAB-PWY	glucose and glucose-1-phosphate degradation	148.707	5.79047	11.4933	8.0444	5.0634	28.9056	37.8628	78.9666	42.3088	50.1808
GLUCUROCAT-PWY	superpathway of &beta;-D-glucuronide and D-glucuronate degradation	37.1027	3.44078	5.93967	5.99763	11.9021	10.2614	9.35449	20.9894	14.5773	30.9612
GLUTORN-PWY	L-ornithine biosynthesis	248.363	13.1227	29.8305	25.582	31.1634	68.2429	48.2094	150.998	107.394	158.379
GLYCOCAT-PWY	glycogen degradation I (bacterial)	191.321	7.01183	13.1203	11.9993	16.7102	40.9569	34.984	118.143	74.5212	102.926
GLYCOGENSYNTH-PWY	glycogen biosynthesis I (from ADP-D-Glucose)	179.335	10.5436	18.8598	18.3067	22.8407	51.7803	31.6335	100.343	75.754	127.025
GLYCOL-GLYOXDEG-PWY	superpathway of glycol metabolism and degradation	1.26106	0	0	0	0	0.242913	0	0	2.1611	3.26069
GLYCOLYSIS	glycolysis I (from glucose 6-phosphate)	262.526	13.4817	30.0451	25.3172	32.2581	71.5459	45.8767	181.074	109.818	166.588
GLYCOLYSIS-E-D	superpathway of glycolysis and Entner-Doudoroff	231.88	10.5724	25.605	18.7665	25.7085	57.3859	42.6772	149.447	89.6107	141.336
GLYCOLYSIS-TCA-GLYOX-BYPASS	superpathway of glycolysis, pyruvate dehydrogenase, TCA, and glyoxylate bypass	226.944	12.9363	27.3809	22.2248	26.6653	60.0609	44.2281	133.375	93.8634	142.536
GLYOXYLATE-BYPASS	glyoxylate cycle	180.305	12.1711	20.2949	18.1664	23.392	50.4548	36.6647	89.7452	68.4233	110.845
GOLPDLCAT-PWY	superpathway of glycerol degradation to 1,3-propanediol	0	0	0	0	0	0	0	0	0	0
HCAMHPDEG-PWY	3-phenylpropanoate and 3-(3-hydroxyphenyl)propanoate degradation to 2-oxopent-4-enoate	3.86885	0	0	0	1.28571	0.294157	0	0	0	3.32184
HEME-BIOSYNTHESIS-II	heme biosynthesis I (aerobic)	169.625	11.5187	17.6813	13.0467	21.0439	42.2075	35.9875	87.8392	65.6871	94.0027
HEMESYN2-PWY	heme biosynthesis II (anaerobic)	233.527	14.9455	26.4915	20.4597	33.1652	60.17	47.6269	135.592	92.6044	148.92
HEXITOLDEGSUPER-PWY	superpathway of hexitol degradation (bacteria)	26.5801	0	3.42384	2.98074	1.62981	14.8833	8.45678	29.5313	7.99069	29.0963
HISDEG-PWY	L-histidine degradation I	144.791	10.5497	20.7059	17.8888	21.4505	44.8652	33.7238	84.2781	69.7681	106.312
HISTSYN-PWY	L-histidine biosynthesis	245.899	13.0402	28.5255	25.0709	31.0524	67.3068	45.0472	154.149	110.632	153.04
HOMOSER-METSYN-PWY	L-methionine biosynthesis I	130.18	10.4935	17.1362	14.3568	19.3707	44.0713	21.7601	78.4065	43.8095	99.7342
HSERMETANA-PWY	L-methionine biosynthesis III	204.06	12.966	23.9343	22.6805	24.1075	58.4247	46.6072	131.039	83.746	129.874
ILEUSYN-PWY	L-isoleucine biosynthesis I (from threonine)	394.426	22.3141	54.3499	38.594	57.4659	106.42	70.4744	256.361	166.224	265.761
KDO-NAGLIPASYN-PWY	superpathway of (Kdo)2-lipid A biosynthesis	8.11294	3.11668	0	3.6481	1.32493	20.981	13.7364	24.6277	10.7928	9.90512
KETOGLUCONMET-PWY	ketogluconate metabolism	24.8839	0	0	0	0.213105	3.42679	0	0	9.5	14.3904
LACTOSECAT-PWY	lactose and galactose degradation I	4.65111	0	0	0	0	0	0	1.52195	0	0
LEU-DEG2-PWY	L-leucine degradation I	166.105	7.88906	17.6743	11.7322	19.4507	43.874	36.6482	82.7684	68.7464	99.2493
LIPASYN-PWY	phospholipases	0	0	0	0	0	0	0	0	0	0
LPSSYN-PWY	superpathway of lipopolysaccharide biosynthesis	0	0	0	0	0	1.02333	0	0	0	0
METH-ACETATE-PWY	methanogenesis from acetate	0	0	0	0	0	0	0	8.87965	0	1.52269
METHANOGENESIS-PWY	methanogenesis from H2 and CO2	0	0	0	0	0	0	0	0	0	0
METHGLYUT-PWY	superpathway of methylglyoxal degradation	17.4724	0	0	0	0	0.302879	2.04271	9.08923	4.05115	1.21471
METHYLGALLATE-DEGRADATION-PWY	methylgallate degradation	5.98242	0	0.655738	0	0	2.48001	3.05743	7.53489	2.51559	3.86454
MET-SAM-PWY	superpathway of S-adenosyl-L-methionine biosynthesis	173.061	12.885	22.4928	19.1987	23.6435	57.5929	31.1947	107.376	63.3692	126.062
NAD-BIOSYNTHESIS-II	NAD salvage pathway II	47.9654	2.21797	7.33315	4.85163	0.393646	9.62068	22.8971	50.9393	22.6688	27.3053
NADSYN-PWY	NAD biosynthesis II (from tryptophan)	55.8383	2.55023	7.73457	8.29094	2.93254	13.7574	12.925	18.4989	32.5103	40.3169
NAGLIPASYN-PWY	lipid IVA biosynthesis	146.328	8.90583	15.637	11.1303	14.8036	39.0457	35.5087	66.1326	79.1895	76.7915
NONMEVIPP-PWY	methylerythritol phosphate pathway I	219.73	12.0124	25.0686	22.6735	32.7021	64.3963	41.5498	130.035	91.8155	145.596
NONOXIPENT-PWY	pentose phosphate pathway (non-oxidative branch)	309.899	15.0231	35.2276	30.7384	39.7919	85.0435	56.5763	216.098	139.176	211.612
OANTIGEN-PWY	O-antigen building blocks biosynthesis (E. coli)	241.223	11.1544	27.4624	21.4276	30.1908	64.6804	43.8764	158.01	99.5901	147.333
ORNARGDEG-PWY	superpathway of L-arginine and L-ornithine degradation	4.32594	0	0	0	0.452146	0.981933	6.83936	12.7511	4.93768	4.24092
ORNDEG-PWY	superpathway of ornithine degradation	30.683	0	0	0	0.3875	7.53967	14.6705	25.3218	8.37309	20.1574
P101-PWY	ectoine biosynthesis	46.935	3.89624	0	3.11338	1.78397	18.8519	7.67358	11.4408	7.35223	8.06225
P105-PWY	TCA cycle IV (2-oxoglutarate decarboxylase)	262.072	16.5903	33.9887	29.0461	37.701	79.919	50.1555	157.215	110.824	182.381
P108-PWY	pyruvate fermentation to propanoate I	182.826	11.6764	28.8227	24.7569	37.2923	59.349	15.9834	108.959	80.0473	150.435
P122-PWY	heterolactic fermentation	61.1362	2.3107	4.7166	6.54721	2.31226	9.5946	7.29504	56.1989	30.0468	55.6658
P124-PWY	Bifidobacterium shunt	132.98	2.53661	5.27288	9.39346	6.45921	16.8149	21.5165	122.39	42.5852	65.799
P125-PWY	superpathway of (R,R)-butanediol biosynthesis	33.81	1.9785	1.9893	1.21899	1.58902	5.54796	5.94599	15.179	11.1047	19.2796
P161-PWY	acetylene degradation	124.177	5.3003	13.3591	17.8417	20.5647	47.2764	14.9489	80.7106	37.4848	111.978
P162-PWY	L-glutamate degradation V (via hydroxyglutarate)	0	0	0	0	0	0	0	0	5.74491	5.08546
P163-PWY	L-lysine fermentation to acetate and butanoate	18.3209	0	2.07873	2.60933	2.92515	4.42084	0	7.41012	0	19.4147
P164-PWY	purine nucleobases degradation I (anaerobic)	37.8852	0	5.23364	0	0	9.28899	0	0	32.7939	41.6768
P184-PWY	protocatechuate degradation I (meta-cleavage pathway)	0	0	0	0	0	0	0	0	1.99795	0.493956
P221-PWY	octane oxidation	90.8215	2.45324	5.09708	1.24533	9.40281	15.0972	20.2597	25.0651	31.8166	25.1491
P23-PWY	reductive TCA cycle I	171.633	3.9777	10.526	18.8809	27.0666	65.3565	22.1863	148.708	95.0981	146.03
P241-PWY	coenzyme B biosynthesis	0	0	0	0	0	0	0	0	0	0
P261-PWY	coenzyme M biosynthesis I	8.21016	0	0	0	0	0	0	0	3.32431	3.1807
P281-PWY	3-phenylpropanoate degradation	15.063	0	1.20104	1.87919	2.92304	8.61338	3.83666	4.18207	2.4432	20.095
P381-PWY	adenosylcobalamin biosynthesis II (late cobalt incorporation)	2.53935	0	0	0	0	0	0	0	11.3722	16.9662
P42-PWY	incomplete reductive TCA cycle	186.878	5.11252	21.8091	19.652	30.4957	62.2324	26.1964	142.976	89.1977	144.13
P441-PWY	superpathway of N-acetylneuraminate degradation	24.1618	1.87021	7.65897	0	2.89448	9.95777	6.63315	7.93592	12.947	24.756
P461-PWY	hexitol fermentation to lactate, formate, ethanol and acetate	7.56964	2.54316	1.28688	7.13995	0.395997	5.7804	5.27873	9.26186	13.182	23.5607
P4-PWY	superpathway of L-lysine, L-threonine and L-methionine biosynthesis I	198.163	12.2357	24.7142	19.6694	28.2523	60.8867	36.1296	105.087	75.6539	138.347
P562-PWY	myo-inositol degradation I	64.1639	4.13222	11.7682	7.29365	4.01585	12.2548	23.6476	65.0264	32.2053	50.4754
P621-PWY	nylon-6 oligomer degradation	0	0	0	0	0	0	0	0	0	1.48776
PANTO-PWY	phosphopantothenate biosynthesis I	236.162	11.7985	24.9691	22.298	31.6391	65.8583	41.2829	139.504	100.968	149.537
PANTOSYN-PWY	pantothenate and coenzyme A biosynthesis I	232.401	11.4328	25.0303	22.6859	31.5788	65.9248	41.5626	138.598	101.765	148.538
PENTOSE-P-PWY	pentose phosphate pathway	231.902	10.5169	26.5107	19.2412	31.9536	66.0889	41.2113	153.333	92.1506	151.466
PEPTIDOGLYCANSYN-PWY	peptidoglycan biosynthesis I (meso-diaminopimelate containing)	245.133	13.0893	28.0071	25.2902	33.6132	67.1654	41.8765	157.638	104.214	161.449
PHOSLIPSYN-PWY	superpathway of phospholipid biosynthesis I (bacteria)	309.968	16.4734	35.9624	31.3352	41.3046	87.4508	57.2449	193.318	124.849	199.643
POLYAMINSYN3-PWY	superpathway of polyamine biosynthesis II	92.8628	4.0728	6.80378	1.30193	9.01858	16.0168	22.0807	31.248	25.2754	37.8829
POLYAMSYN-PWY	superpathway of polyamine biosynthesis I	76.6892	5.44086	9.72617	8.83791	10.4623	16.9491	19.3365	44.2643	28.6573	48.4743
POLYISOPRENSYN-PWY	polyisoprenoid biosynthesis (E. coli)	219.819	11.6608	25.2403	22.3417	27.2422	59.0271	39.4907	135.605	101.463	136.269
PPGPPMET-PWY	ppGpp biosynthesis	79.5761	4.42833	4.72135	2.6669	5.37531	22.6948	24.1894	24.5666	22.5601	16.8626
PROTOCATECHUATE-ORTHO-CLEAVAGE-PWY	protocatechuate degradation II (ortho-cleavage pathway)	118.606	6.12285	13.0988	9.36397	15.5216	28.8689	30.7068	57.6876	43.6601	77.7666
PRPP-PWY	superpathway of histidine, purine, and pyrimidine biosynthesis	137.139	9.87575	22.3516	18.248	6.76439	50.6646	37.6342	120.478	81.5274	113.816
PWY0-1061	superpathway of L-alanine biosynthesis	198.311	10.9971	20.6368	13.6996	22.3837	56.4673	46.2909	141.285	71.5727	100.386
PWY0-1241	ADP-L-glycero-&beta;-D-manno-heptose biosynthesis	69.4457	3.27651	6.58459	3.25238	7.8739	28.8786	16.4853	44.1219	36.7977	40.4295
PWY0-1261	anhydromuropeptides recycling	221.259	16.776	28.4457	23.5479	29.9284	67.4986	49.568	143.786	99.1201	156.903
PWY0-1277	3-phenylpropanoate and 3-(3-hydroxyphenyl)propanoate degradation	11.6832	0	0	0	2.38411	1.05687	0	0	0	9.1308
PWY0-1296	purine ribonucleosides degradation	94.5943	10.0653	16.4561	16.5623	19.5933	49.1609	15.6196	70.353	38.6813	91.1362
PWY0-1297	superpathway of purine deoxyribonucleosides degradation	100.046	10.2146	16.4003	16.8698	19.0496	46.2766	16.2567	74.746	44.923	94.713
PWY0-1298	superpathway of pyrimidine deoxyribonucleosides degradation	70.6163	7.13712	12.2486	13.7836	15.795	37.1282	13.1483	56.6444	36.347	77.9188
PWY0-1319	CDP-diacylglycerol biosynthesis II	331.92	17.9753	38.7479	33.3239	42.7357	99.4002	64.0498	206.239	142.308	210.751
PWY0-1338	polymyxin resistance	1.27813	0	0	0	0.24	0.457751	2.97426	5.67075	2.63036	1.75021
PWY0-1415	superpathway of heme biosynthesis from uroporphyrinogen-III	94.7927	6.73525	11.5716	10.7634	18.3307	36.0902	10.7328	69.1452	45.5547	85.2347
PWY0-1479	tRNA processing	145.011	9.01358	16.2651	11.4746	6.97441	41.3479	34.69	107.175	63.1312	91.414
PWY0-1533	methylphosphonate degradation I	24.8416	4.31735	4.15152	2.05128	7.22015	4.82494	7.90628	6.39762	8.34931	19.6778
PWY0-1586	peptidoglycan maturation (meso-diaminopimelate containing)	202.864	16.2046	26.679	27.5365	29.3522	74.1007	45.7725	157.897	88.6562	146.772
PWY0-162	superpathway of pyrimidine ribonucleotides de novo biosynthesis	281.576	15.4271	33.4958	28.2099	39.2265	78.5327	49.6188	177.368	124.74	184.555
PWY0-166	superpathway of pyrimidine deoxyribonucleotides de novo biosynthesis (E. coli)	212.708	10.9304	25.3193	20.0058	30.6564	58.8772	40.6949	126.911	93.4806	139.773
PWY0-321	phenylacetate degradation I (aerobic)	32.7828	0	6.8836	0	0	8.68468	19.6122	27.178	18.7913	20.1996
PWY0-41	allantoin degradation IV (anaerobic)	0	0	0	0	0	0.385567	0	0	0	0
PWY0-42	2-methylcitrate cycle I	90.1939	3.92372	6.56593	2.81264	2.70512	22.2564	20.9615	40.5042	27.9007	30.4204
PWY0-781	aspartate superpathway	190.126	10.8133	23.5087	19.4271	25.2941	58.4944	36.1894	105.949	73.9506	132.71
PWY0-845	superpathway of pyridoxal 5'-phosphate biosynthesis and salvage	84.8497	3.96862	8.51101	6.15641	11.1936	26.2984	23.6301	48.9814	46.6164	50.8322
PWY0-862	(5Z)-dodec-5-enoate biosynthesis	222.612	15.039	23.0425	12.7301	23.5815	59.1823	54.8671	92.5448	77.053	99.7921
PWY-1269	CMP-3-deoxy-D-manno-octulosonate biosynthesis I	139.696	8.19333	16.2162	11.8433	14.8123	38.2904	32.2077	56.1612	75.3499	74.4689
PWY-1361	benzoyl-CoA degradation I (aerobic)	0	0	0	0	0	2.21107	0	0	0	2.01814
PWY-1422	vitamin E biosynthesis (tocopherols)	0	0	0	0	0	0	3.64246	24.1115	3.96948	0.579458
PWY-1501	mandelate degradation I	0	0	0	0	0	0	0	0	0	3.30201
PWY-1541	superpathway of taurine degradation	6.69633	0	0	0	0	0	2.70262	0	3.71633	0
PWY-1622	formaldehyde assimilation I (serine pathway)	20.2969	0	0	0	0	0	0	0	0	8.73199
PWY-181	photorespiration	91.633	7.53898	6.76879	9.29599	5.1311	35.3133	16.0356	24.9825	27.0663	55.1307
PWY-1861	formaldehyde assimilation II (RuMP Cycle)	10.3179	2.01651	6.56794	8.61988	0	10.093	0	7.02993	0	34.0756
PWY-1882	superpathway of C1 compounds oxidation to CO2	9.9176	0	0	0	0	0	0	0	0	0
PWY1G-0	mycothiol biosynthesis	23.8713	1.45833	2.31936	2.63102	7.59338	5.4485	1.77778	33.403	6.16174	24.7598
PWY-2221	Entner-Doudoroff pathway III (semi-phosphorylative)	18.3342	0	0	0	0	0	0	0	0	6.54447
PWY-2941	L-lysine biosynthesis II	25.2249	4.6318	9.01483	13.0427	7.50535	24.511	0	3.64423	22.1878	55.4146
PWY-2942	L-lysine biosynthesis III	280.996	17.0876	34.8295	30.9135	40.1451	84.6457	52.1697	172.385	121.884	193.152
PWY-3001	superpathway of L-isoleucine biosynthesis I	296.882	16.3213	36.3134	30.7716	40.5357	85.2025	53.7353	195.273	130.192	192.303
PWY-3081	L-lysine biosynthesis V	0	0	0	0	0	0	0	0	0	0
PWY-3661	glycine betaine degradation I	16.274	1.06262	0	0	0	0	5.32786	0	17.9522	0
PWY-3781	aerobic respiration I (cytochrome c)	730.03	33.7022	83.4234	69.8285	99.2637	188.807	131.045	460.132	311.84	464.378
PWY-3801	sucrose degradation II (sucrose synthase)	0	0	0	0	0	0	0	0	0	0
PWY-3941	&beta;-alanine biosynthesis II	2.41886	0	0	0	0	0	0	0	0.496319	1.04585
PWY-4361	S-methyl-5-thio-&alpha;-D-ribose 1-phosphate degradation	6.1591	0.926641	2.57594	4.36544	0	4.19234	0	0	6.56363	13.7857
PWY-4722	creatinine degradation II	0	0	0	0	0	0	0	0	0	0
PWY490-3	nitrate reduction VI (assimilatory)	49.5042	1.43198	0.98477	0.977778	2.46392	3.42156	3.90427	28.081	6.04477	14.1403
PWY-4984	urea cycle	114.088	7.67067	12.4775	15.7085	15.7254	28.0235	17.0049	38.8701	40.0326	80.3295
PWY4FS-7	phosphatidylglycerol biosynthesis I (plastidic)	292.237	14.6513	33.5646	29.607	39.3348	82.6722	49.7881	181.984	116.802	189.813
PWY4FS-8	phosphatidylglycerol biosynthesis II (non-plastidic)	292.237	14.6513	33.5646	29.607	39.3348	82.6722	49.7881	181.984	116.802	189.813
PWY-5005	biotin biosynthesis II	5.41019	0	0	0	0	2.04688	0	4.10372	4.5702	6.57927
PWY-5022	4-aminobutanoate degradation V	142.711	0	7.30435	0	5.16129	26.0957	0	16.9984	26.0197	68.6394
PWY-5028	L-histidine degradation II	67.175	3.03207	11.7553	7.00093	2.01839	17.2207	23.1429	56.11	38.4878	49.9025
PWY-5088	L-glutamate degradation VIII (to propanoate)	2.07302	0	0	0	0	0	0	0	3.05253	0.397619
PWY-5097	L-lysine biosynthesis VI	266.007	16.1374	31.7336	28.3471	38.2341	80.2169	51.3336	166.449	117.815	180.602
PWY-5100	pyruvate fermentation to acetate and lactate II	70.9574	4.23286	6.91261	10.1048	11.1482	33.722	12.5162	72.0766	40.3884	71.6305
PWY-5101	L-isoleucine biosynthesis II	409.898	22.8258	54.7071	40.3703	59.2142	111.787	73.0039	266.244	175.22	275.977
PWY-5103	L-isoleucine biosynthesis III	315.368	17.8104	39.5532	32.544	45.22	88.4083	57.48	208.512	138.878	206.51
PWY-5104	L-isoleucine biosynthesis IV	178.632	10.5872	15.9054	14.2317	21.2153	51.4593	35.0747	141.574	69.6473	117.2
PWY-5121	superpathway of geranylgeranyl diphosphate biosynthesis II (via MEP)	216.009	11.1489	22.4178	22.8551	31.0215	59.0695	36.6464	136.277	91.2517	143.399
PWY-5154	L-arginine biosynthesis III (via N-acetyl-L-citrulline)	227.641	10.7167	26.6528	12.7186	26.9908	50.6234	42.3549	100.686	94.6613	134.347
PWY-5177	glutaryl-CoA degradation	0	0	0	0	0	0	0	0	4.77368	3.917
PWY-5178	toluene degradation IV (aerobic) (via catechol)	18.2569	0	0	0	0	4.04075	1.45226	8.58886	0	13.0063
PWY-5180	toluene degradation I (aerobic) (via o-cresol)	50.6517	3.15493	3.72074	5.86716	14.4399	18.0707	7.27202	23.2492	7.38709	53.2148
PWY-5181	toluene degradation III (aerobic) (via p-cresol)	43.2513	0	5.01604	0	0	7.67046	16.4745	24.5275	16.2016	17.4031
PWY-5182	toluene degradation II (aerobic) (via 4-methylcatechol)	50.6517	3.15493	3.72074	5.86716	14.4399	18.0707	7.27202	23.2492	7.38709	53.2148
PWY-5183	superpathway of aerobic toluene degradation	15.9809	0	0	0	0	4.1298	0	9.85707	0	12.2618
PWY-5188	tetrapyrrole biosynthesis I (from glutamate)	248.87	13.0764	28.5641	23.5793	34.8716	71.1867	45.6728	148.366	101.964	164.284
PWY-5189	tetrapyrrole biosynthesis II (from glycine)	238.077	13.2292	29.2065	21.8354	34.842	69.8157	45.6779	148.105	95.5828	159.366
PWY-5198	factor 420 biosynthesis	1.62597	0	0	0	0	1.83206	0.780488	37.8758	3.92079	8.97781
PWY-5265	peptidoglycan biosynthesis II (staphylococci)	13.2945	0	0	0	0	0	0	0	0	3.51141
PWY-5304	superpathway of sulfur oxidation (Acidianus ambivalens)	28	1.33333	4.66667	4.89	3.22	4.5	9.33333	33.3333	15.5567	19.0283
PWY-5345	superpathway of L-methionine biosynthesis (by sulfhydrylation)	221.518	12.2298	24.5111	20.1234	26.303	63.1814	44.3822	125.56	84.9154	133.108
PWY-5347	superpathway of L-methionine biosynthesis (transsulfuration)	168.882	13.008	22.0712	18.9009	25.943	58.9972	27.9798	81.1523	62.2018	128.31
PWY-5384	sucrose degradation IV (sucrose phosphorylase)	139.187	5.1901	10.5667	7.36105	4.82575	26.6888	34.8936	72.1514	38.5531	47.1839
PWY-5392	reductive TCA cycle II	16.2626	0	0	2.75543	0	0	0	30.2939	0	1.70703
PWY-5415	catechol degradation I (meta-cleavage pathway)	44.916	3.29412	3.27857	5.82593	13.8992	16.0398	5.63947	19.6835	5.62064	47.1977
PWY-5417	catechol degradation III (ortho-cleavage pathway)	50.6878	1.89378	4.62181	0.727273	0.202889	9.25436	17.3766	31.1593	22.2633	25.5767
PWY-5419	catechol degradation to 2-oxopent-4-enoate II	16.3752	0	1.74485	3.47596	0	4.0624	4.19461	1.9476	7.44458	8.62388
PWY-5420	catechol degradation II (meta-cleavage pathway)	22.2683	0	0.955432	3.41726	0	5.64374	4.73032	3.16934	6.00407	12.5375
PWY-5430	meta cleavage pathway of aromatic compounds	19.6823	0	0.845557	0	0	4.10384	3.35885	3.5715	0.847549	9.55074
PWY-5431	aromatic compounds degradation via &beta;-ketoadipate	50.6878	1.89378	4.62181	0.727273	0.202889	9.25436	17.3766	31.1593	22.2633	25.5767
PWY-5484	glycolysis II (from fructose 6-phosphate)	240.438	13.9197	27.1015	22.8414	29.2144	64.858	43.4229	169.833	98.3454	151.884
PWY-5505	L-glutamate and L-glutamine biosynthesis	144.591	8.81536	17.2886	13.5179	13.0457	41.0908	26.5982	105.272	66.4825	102.306
PWY-5507	adenosylcobalamin biosynthesis I (early cobalt insertion)	2.05353	0	0	0	0	0	0	0	6.99778	12.2912
PWY-5509	adenosylcobalamin biosynthesis from cobyrinate a,c-diamide I	112.648	7.44287	15.0496	14.0426	14.0903	39.2676	26.5184	70.3184	52.7061	85.6853
PWY-5529	superpathway of bacteriochlorophyll a biosynthesis	3.86552	0	0	0	0	0	0	0	0	0
PWY-5531	chlorophyllide a biosynthesis II (anaerobic)	18.4003	2.96478	0	0	0	2.24178	4.44442	32.8063	9.45327	9.02985
PWY-5532	adenosine nucleotides degradation IV	0	0	0	0	0	0	0	1.2	0	0
PWY-5647	2-nitrobenzoate degradation I	8.61345	0	1.05865	1.66667	0	1.42978	0.854701	0.866142	10.7713	4.97744
PWY-5651	L-tryptophan degradation to 2-amino-3-carboxymuconate semialdehyde	38.7321	2.13372	5.56278	6.41527	2.04701	9.56168	9.28134	12.4744	23.5975	28.6865
PWY-5654	2-amino-3-carboxymuconate semialdehyde degradation to 2-oxopentenoate	7.86251	0	1.04762	1.66667	0	1.69355	0.761905	0.727273	10.39	4.82147
PWY-5655	L-tryptophan degradation IX	14.07	0	0.789913	2.72048	0	2.64694	1.31254	0	7.61146	9.00858
PWY-5656	mannosylglycerate biosynthesis I	0	0	0	0	0	0	0	0	0	0.434642
PWY-5659	GDP-mannose biosynthesis	289.672	12.2483	32.6053	23.9119	36.8396	73.5929	52.3358	200.091	123.025	176.99
PWY-5667	CDP-diacylglycerol biosynthesis I	331.92	17.9753	38.7479	33.3239	42.7357	99.4002	64.0498	206.239	142.308	210.751
PWY-5676	acetyl-CoA fermentation to butanoate II	20.8365	1.11499	6.92695	0	4.12997	2.89768	1.65718	3.32309	5.68313	23.7558
PWY-5677	succinate fermentation to butanoate	1.26994	0	0	0	0	0.0659338	0	0	0	0
PWY-5686	UMP biosynthesis	282.693	15.427	34.0641	28.5687	39.3337	79.0432	49.4612	174.908	124.202	188.854
PWY-5695	urate biosynthesis/inosine 5'-phosphate degradation	290.886	18.1888	38.6485	26.7938	42.6741	74.566	59.3456	192.373	117.678	198.322
PWY-5705	allantoin degradation to glyoxylate III	21.1318	2.99031	4.2963	1.97826	4.2069	7.22732	3.69513	6.37415	4.66559	22.5326
PWY-5741	ethylmalonyl-CoA pathway	24.0055	0.990162	1.3408	0	3.78882	2.39422	1.48121	0	2.0899	14.5803
PWY-5743	3-hydroxypropanoate cycle	0	0	0	0	0	0	0	0	0	0
PWY-5744	glyoxylate assimilation	0	0	0	0	0	0	0	0	0	0
PWY-5747	2-methylcitrate cycle II	95.9217	4.96489	8.06122	5.02735	2.5826	22.9744	22.4262	42.7021	30.0092	33.773
PWY-5837	1,4-dihydroxy-2-naphthoate biosynthesis I	41.7846	5.94684	3.69631	7.49229	9.71906	26.2948	4.98599	43.9505	13.5259	43.2412
PWY-5838	superpathway of menaquinol-8 biosynthesis I	88.9067	7.21564	8.36538	10.4901	16.1323	36.5476	8.47774	79.941	31.04	72.7579
PWY-5840	superpathway of menaquinol-7 biosynthesis	85.6877	7.37788	8.20341	10.5677	16.1888	35.1789	7.61262	77.584	29.9248	72.4227
PWY-5845	superpathway of menaquinol-9 biosynthesis	53.8231	3.28265	2.70949	0	6.95419	11.8598	7.90273	70.7259	25.2595	42.933
PWY-5850	superpathway of menaquinol-6 biosynthesis I	45.1754	3.28265	2.70949	0	6.95419	11.8598	7.58201	63.9026	23.7896	39.6595
PWY-5855	ubiquinol-7 biosynthesis (prokaryotic)	176.227	8.59365	16.2232	11.2146	15.7464	38.9758	39.1872	84.8405	59.4182	78.952
PWY-5856	ubiquinol-9 biosynthesis (prokaryotic)	176.227	8.59365	16.2232	11.2146	15.7464	38.9758	39.1872	84.8405	59.4182	78.952
PWY-5857	ubiquinol-10 biosynthesis (prokaryotic)	176.227	8.59365	16.2232	11.2146	15.7464	38.9758	39.1872	84.8405	59.4182	78.952
PWY-5860	superpathway of demethylmenaquinol-6 biosynthesis I	32.4548	2.62923	1.97733	0	5.41346	8.81396	5.42933	48.4696	17.2017	29.4219
PWY-5861	superpathway of demethylmenaquinol-8 biosynthesis	66.6012	5.95319	6.27021	8.70917	12.9242	30.5687	6.12788	62.752	23.0648	57.237
PWY-5862	superpathway of demethylmenaquinol-9 biosynthesis	39.007	2.62923	1.97733	0	5.41346	8.81396	5.67876	54.7007	18.4939	31.796
PWY-5863	superpathway of phylloquinol biosynthesis	46.0888	5.87045	4.07963	8.03478	10.3812	25.3707	5.52271	47.8456	14.9247	46.8081
PWY-5896	superpathway of menaquinol-10 biosynthesis	45.1754	3.28265	2.70949	0	6.95419	11.8598	7.58201	63.9026	23.7896	39.6595
PWY-5897	superpathway of menaquinol-11 biosynthesis	83.5484	7.50552	7.77094	10.2674	15.6625	35.7233	8.03434	77.5936	28.7865	70.0488
PWY-5898	superpathway of menaquinol-12 biosynthesis	83.5484	7.50552	7.77094	10.2674	15.6625	35.7233	8.03434	77.5936	28.7865	70.0488
PWY-5899	superpathway of menaquinol-13 biosynthesis	83.5484	7.50552	7.77094	10.2674	15.6625	35.7233	8.03434	77.5936	28.7865	70.0488
PWY-5910	superpathway of geranylgeranyldiphosphate biosynthesis I (via mevalonate)	8.19219	0	0	0.729083	0	0	0.816672	3.69543	0	2.97764
PWY-5913	TCA cycle VI (obligate autotrophs)	220.468	14.2958	26.8142	19.5015	23.5024	53.8648	49.1876	147.288	85.73	131.039
PWY-5918	superpathay of heme biosynthesis from glutamate	204.152	11.1068	22.1433	16.899	26.6606	54.8463	40.4932	116.104	82.6326	124.662
PWY-5920	superpathway of heme biosynthesis from glycine	108.534	8.89726	15.5691	11.8924	20.1394	35.5899	15.4895	75.4442	50.6649	93.8112
PWY-5941	glycogen degradation II (eukaryotic)	27.4588	0	0	0	0	5.57913	0	0	7.94831	15.4611
PWY-5971	palmitate biosynthesis II (bacteria and plants)	101.921	0	0	0	0	0	0	27.4099	0	62.7797
PWY-5973	cis-vaccenate biosynthesis	327.56	23.7962	43.3633	32.0592	51.1519	114.774	75.769	161.282	147.654	211.487
PWY-5989	stearate biosynthesis II (bacteria and plants)	235.621	15.6693	24.5261	13.7642	25.1982	64.4462	57.477	101.834	82.1079	108.022
PWY-6071	superpathway of phenylethylamine degradation	21.7042	0	2.28904	0	0	7.04143	8.6153	14.8909	1.55258	17.0893
PWY-6107	chlorosalicylate degradation	4.16644	0	0.454545	0	0	2.26415	1.4324	1.42505	0.250936	1.40873
PWY-6113	superpathway of mycolate biosynthesis	0	0	0	0	0	0	0	0	0	9.74489
PWY-6121	5-aminoimidazole ribonucleotide biosynthesis I	270.784	15.3919	32.684	28.0255	39.7285	79.539	51.3915	162.738	112.469	181.362
PWY-6122	5-aminoimidazole ribonucleotide biosynthesis II	262.562	14.9457	31.8419	27.8545	39.3148	77.9144	48.4954	158.328	108.446	179.264
PWY-6123	inosine-5'-phosphate biosynthesis I	234.757	13.3237	28.2509	24.6919	33.5683	68.3746	41.6167	140.963	100.155	157.52
PWY-6125	superpathway of guanosine nucleotides de novo biosynthesis II	271.433	15.068	31.2416	26.7338	38.0004	75.5087	47.7554	168.921	117.984	174.399
PWY-6126	superpathway of adenosine nucleotides de novo biosynthesis II	290.244	15.9547	33.4788	29.195	38.8999	82.4277	51.3221	184.389	126.406	185.249
PWY-6147	6-hydroxymethyl-dihydropterin diphosphate biosynthesis I	256.186	12.0685	23.0667	20.6588	30.2374	63.4374	48.2994	148.233	104.264	147.445
PWY-6148	tetrahydromethanopterin biosynthesis	0	0	0	0	0	0	0	0	0	0.957554
PWY-6151	S-adenosyl-L-methionine cycle I	95.0374	8.8993	12.3521	16.2184	13.1566	43.2269	26.5069	54.3546	46.5998	91.7365
PWY-6163	chorismate biosynthesis from 3-dehydroquinate	263.331	14.1027	30.38	25.4662	35.103	72.8529	45.8528	157.333	111.746	168.296
PWY-6165	chorismate biosynthesis II (archaea)	0	0	0	0	0	0	0	0	0	0
PWY-6167	flavin biosynthesis II (archaea)	0	0	0	0	0	0	0	0	0	0
PWY-6174	mevalonate pathway II (archaea)	2.15491	0	0	0	0	0	0	0	0	0.877164
PWY-6182	superpathway of salicylate degradation	43.3804	1.85762	4.18089	0	0.2353	9.00889	15.9108	25.8922	14.6113	22.3924
PWY-6185	4-methylcatechol degradation (ortho cleavage)	32.2833	0	4.42031	0	0	5.24085	14.7869	20.5794	13.8125	13.3944
PWY-621	sucrose degradation III (sucrose invertase)	140.045	5.11305	10.5667	8.41626	5.42071	26.0619	35.2468	72.2919	38.87	50.1801
PWY-6210	2-aminophenol degradation	5.7037	0	0	1.66667	0	0.992908	0.761905	0	0	3.56148
PWY-622	starch biosynthesis	0	0	0	0	0	0	0	0	0	0
PWY-6263	superpathway of menaquinol-8 biosynthesis II	35.1037	2.36834	6.21225	8.0958	7.49723	17.9141	2.57259	12.2961	21.2639	42.3996
PWY-6269	adenosylcobalamin salvage from cobinamide II	112.927	7.4423	15.1328	14.1319	14.0935	39.52	26.6255	70.3402	53.2788	85.8791
PWY-6277	superpathway of 5-aminoimidazole ribonucleotide biosynthesis	262.562	14.9457	31.8419	27.8545	39.3148	77.9144	48.4954	158.328	108.446	179.264
PWY-6282	palmitoleate biosynthesis I (from (5Z)-dodec-5-enoate)	230.376	15.5641	24.0084	13.2473	24.4761	61.8575	56.5122	97.2523	79.7672	104.348
PWY-6284	superpathway of unsaturated fatty acids biosynthesis (E. coli)	0	0	0	0	0	0	0	0	0	4.43721
PWY-6285	superpathway of fatty acids biosynthesis (E. coli)	0	0	0	0	0	0	0	0	0	7.12739
PWY-6317	galactose degradation I (Leloir pathway)	93.9196	6.83818	15.646	13.7376	18.1809	45.1471	12.1256	70.369	48.2047	92.6652
PWY-6338	superpathway of vanillin and vanillate degradation	0	0	0	0	0	0	0	0	1.68294	0
PWY-6339	syringate degradation	0	0	0	0	0	3.87507	0	0	0	2.86829
PWY-6349	CDP-archaeol biosynthesis	0	0	0	0	0	0	0	1.26667	0	0.625
PWY-6350	archaetidylinositol biosynthesis	0	0	0	0	0	0	0	1.20253	0	0.595238
PWY-6353	purine nucleotides degradation II (aerobic)	182.087	11.8555	26.9057	22.5334	28.1422	68.3035	32.5756	128.153	82.6853	151.426
PWY-6383	mono-trans, poly-cis decaprenyl phosphate biosynthesis	24.5056	1.99458	2.51696	3.28898	8.69549	8.09747	2.62451	28.5696	8.35177	31.9003
PWY-6385	peptidoglycan biosynthesis III (mycobacteria)	234.94	12.9206	27.6066	25.0035	32.8091	66.1474	40.6368	155.411	101.689	156.177
PWY-6386	UDP-N-acetylmuramoyl-pentapeptide biosynthesis II (lysine-containing)	234.705	13.0873	27.6892	25.2438	32.754	65.1788	40.1958	153.769	100.886	157.282
PWY-6387	UDP-N-acetylmuramoyl-pentapeptide biosynthesis I (meso-diaminopimelate containing)	247.821	13.2401	28.3315	25.6253	34.0094	67.8117	42.0963	158.001	104.413	163.617
PWY-6396	superpathway of 2,3-butanediol biosynthesis	21.9673	0.888889	0	0	1.62002	1.60105	4.5113	6.1966	1.20219	15.3942
PWY-6397	mycolyl-arabinogalactan-peptidoglycan complex biosynthesis	4.03064	0	0	0.516722	1.02001	0	1.03094	1.02103	0	2.54291
PWY-6404	superpathway of mycolyl-arabinogalactan-peptidoglycan complex biosynthesis	10.9455	0	0	0	0	0	0	0	0	2.58068
PWY-6467	Kdo transfer to lipid IVA III (Chlamydia)	142.057	8.86	17.0533	12.51	14.2	40.5333	34.45	56.7333	76.4933	73.9817
PWY-6470	peptidoglycan biosynthesis V (&beta;-lactam resistance)	20.1893	3.05861	0	5.16812	8.18669	19.051	0	0	9.75146	36.7832
PWY-6471	peptidoglycan biosynthesis IV (Enterococcus faecium)	31.2991	5.38564	5.47896	12.1867	11.3997	33.6619	0	7.12033	14.7978	57.6385
PWY-6478	GDP-D-glycero-&alpha;-D-manno-heptose biosynthesis	20.4528	0	5.2194	2.60281	3.855	6.67063	3.3617	35.1094	12.2446	24.294
PWY-6505	L-tryptophan degradation XII (Geobacillus)	10.9637	0	0	2.54724	0	1.92822	0	0	0	6.33437
PWY-6507	4-deoxy-L-threo-hex-4-enopyranuronate degradation	11.0438	3.02012	5.78695	2.44743	8.01095	8.82607	0.963636	9.70615	10.4878	22.5514
PWY-6519	8-amino-7-oxononanoate biosynthesis I	186.571	8.96672	18.8545	10.3019	9.67402	44.579	46.6564	85.1352	69.0173	74.2589
PWY-6545	pyrimidine deoxyribonucleotides de novo biosynthesis III	131.201	6.06755	13.084	12.1902	11.404	23.8324	12.914	86.2631	36.0211	81.6664
PWY-6562	norspermidine biosynthesis	17.2675	1.89326	0	2.39676	0.714643	14.8658	5.85715	11.1064	3.93858	10.1338
PWY-6565	superpathway of polyamine biosynthesis III	0.686383	2.2886	0	2.25382	0	16.3716	0.695439	0	0	0.130442
PWY-6572	chondroitin sulfate degradation I (bacterial)	0	0	0	0	0	0	0	0	0	0
PWY-6581	spirilloxanthin and 2,2'-diketo-spirilloxanthin biosynthesis	0	0.666667	0	0	0	0	0	0	1.33333	0
PWY-6588	pyruvate fermentation to acetone	25.2283	0	0	0	0	2.52862	1.25224	3.76739	11.0973	21.2363
PWY-6590	superpathway of Clostridium acetobutylicum acidogenic fermentation	13.0061	1.31205	4.61491	6.35863	0	9.69133	0	0	15.3347	31.0101
PWY-6608	guanosine nucleotides degradation III	200.711	11.9329	26.0085	23.1396	32.3351	69.1505	45.6909	116.62	91.0965	155.524
PWY-6609	adenine and adenosine salvage III	145.471	11.4293	20.3248	20.9004	28.7504	67.1398	23.0532	100.193	74.6143	135.354
PWY-6612	superpathway of tetrahydrofolate biosynthesis	205.944	12.2562	23.4488	19.8042	27.1961	58.3226	42.0995	114.846	96.8544	131.571
PWY-6628	superpathway of L-phenylalanine biosynthesis	231.965	11.1889	27.3212	21.5145	21.4068	62.3701	47.4248	137.881	103.04	133.529
PWY-6629	superpathway of L-tryptophan biosynthesis	0	0	0	0	0	1.91618	0	0	0	0
PWY-6630	superpathway of L-tyrosine biosynthesis	215.971	10.862	26.8525	21.2197	21.3992	60.5535	44.4343	133.216	99.7571	131.158
PWY-6641	superpathway of sulfolactate degradation	8.43985	0	0	0	0	0.696485	0	0	4.34624	4.68678
PWY-6654	phosphopantothenate biosynthesis III	0	0	0	0	0	0	0	1.94089	0	0.966343
PWY-6690	cinnamate and 3-hydroxycinnamate degradation to 2-oxopent-4-enoate	3.86885	0	0	0	1.28571	0.294157	0	0	0	3.32184
PWY-6700	queuosine biosynthesis	196.738	11.7975	22.9232	18.4208	23.9603	54.2304	40.8209	111.64	91.9904	119.427
PWY-6703	preQ0 biosynthesis	189.831	8.44659	26.8629	16.7542	20.088	46.6752	45.2477	106.482	91.4078	116.216
PWY-6708	ubiquinol-8 biosynthesis (prokaryotic)	176.227	8.59365	16.2232	11.2146	15.7464	38.9758	39.1872	84.8405	59.4182	78.952
PWY-6713	L-rhamnose degradation II	0	0	0	0	0	0	0	0	0	0
PWY-6728	methylaspartate cycle	24.1933	0	0	0	0	0	0	0	5.0666	6.24542
PWY-6731	starch degradation III	0	0	0.854093	0	0	0.751317	0	0	0	1.35162
PWY-6737	starch degradation V	184.176	6.90433	12.5242	10.3682	12.8075	38.746	35.5895	102.137	70.1497	97.5932
PWY-6749	CMP-legionaminate biosynthesis I	0.499322	0.37416	2.29497	0.347961	1.24958	2.50871	2.38758	0	6.78414	8.10006
PWY-6876	isopropanol biosynthesis	25.2283	0	0	0	0	2.52862	1.25224	0	11.0973	17.6959
PWY-6891	thiazole biosynthesis II (Bacillus)	10.7098	2.58386	6.06472	6.80798	1.89784	23.1848	6.15063	10.8356	4.96444	19.0823
PWY-6892	thiazole biosynthesis I (E. coli)	35.3017	2.9534	3.30725	6.74527	5.62063	30.9063	9.00573	26.866	21.458	31.6897
PWY-6895	superpathway of thiamin diphosphate biosynthesis II	40.1908	4.19981	14.9726	12.973	6.30849	43.0728	18.8126	40.6132	15.1335	59.8759
PWY-6897	thiamin salvage II	235.694	12.3125	26.9594	22.7026	29.8802	65.0878	42.5344	139.382	96.5277	146.526
PWY-6901	superpathway of glucose and xylose degradation	88.8839	5.93157	14.5647	9.41637	13.4378	25.149	11.6713	62.3978	52.7495	94.8255
PWY-6906	chitin derivatives degradation	0.61838	2.11582	0	2.15646	0	13.196	0.588364	0	0	0.869541
PWY-6944	androstenedione degradation	10.345	0	0.789474	0	0	2.11957	2.02446	5.07048	0.391304	4.61284
PWY-6948	sitosterol degradation to androstenedione	4.53901	0	0	0	1.63772	0	0	0	0	0.872367
PWY-6957	mandelate degradation to acetyl-CoA	0	0	0	0	0	0	0	0	0	3.88805
PWY-6969	TCA cycle V (2-oxoglutarate:ferredoxin oxidoreductase)	294.716	16.8535	38.0299	32.8362	45.4061	88.1663	52.9426	194.062	132.948	210.258
PWY-6992	1,5-anhydrofructose degradation	4.36696	0	0	0	0	2.15299	3.6856	9.0911	2.35345	6.57318
PWY-7003	glycerol degradation to butanol	6.59873	0	0	0	0	0	0	3.98472	2.70751	8.34428
PWY-7007	methyl ketone biosynthesis	34.4012	2.35145	3.1495	3.76806	11.1225	10.4011	1.92995	22.9018	5.16511	35.9234
PWY-7013	L-1,2-propanediol degradation	0	0	0	0	0	0	0	0	0	0
PWY-7046	4-coumarate degradation (anaerobic)	0	0	0	0	0	0	0	0	0	0.665667
PWY-7090	UDP-2,3-diacetamido-2,3-dideoxy-&alpha;-D-mannuronate biosynthesis	4.2539	0	0	0	0	0	0	0	11.7819	1.29492
PWY-7094	fatty acid salvage	363.495	15.9499	42.653	33.8055	54.6627	106.701	70.6119	192.883	109.742	230.528
PWY-7097	vanillin and vanillate degradation I	0	0	0	0	0	0	0	0	1.68294	0
PWY-7098	vanillin and vanillate degradation II	0	0	0	0	0	0	0	0	1.87639	0
PWY-7111	pyruvate fermentation to isobutanol (engineered)	491.111	28.6543	66.9779	49.527	64.1513	127.451	105.563	314.739	192.086	312.879
PWY-7159	chlorophyllide a biosynthesis III (aerobic, light independent)	18.4003	2.96478	0	0	0	2.24178	4.44442	32.8063	9.45327	9.02985
PWY-7184	pyrimidine deoxyribonucleotides de novo biosynthesis I	226.335	11.5968	26.6162	21.066	32.3726	63.5564	43.5642	134.528	100.93	148.185
PWY-7187	pyrimidine deoxyribonucleotides de novo biosynthesis II	118.59	6.96046	18.9822	13.8528	5.16225	38.4747	33.4528	100.823	74.8821	93.4583
PWY-7196	superpathway of pyrimidine ribonucleosides salvage	167.473	11.5326	23.7958	22.1315	24.3518	57.1849	30.5322	131.903	93.5158	137.769
PWY-7197	pyrimidine deoxyribonucleotide phosphorylation	240.46	12.86	27.8117	24.2516	32.2972	65.4522	42.3775	155.365	104.576	151.84
PWY-7198	pyrimidine deoxyribonucleotides de novo biosynthesis IV	0	0	4.49367	2.87087	0	0	0	3.2741	0	3.33487
PWY-7199	pyrimidine deoxyribonucleosides salvage	101.387	10.3325	17.5241	17.0282	21.4554	42.8193	23.3966	77.7457	57.4656	96.1408
PWY-7200	superpathway of pyrimidine deoxyribonucleoside salvage	146.07	11.3974	21.9594	20.0196	24.1188	52.6718	30.7397	105.798	75.8397	118.47
PWY-7208	superpathway of pyrimidine nucleobases salvage	297.003	16.2885	34.8551	30.3293	40.722	82.3871	53.2895	193.548	136.05	195.638
PWY-7210	pyrimidine deoxyribonucleotides biosynthesis from CTP	0	0	5.7455	3.83992	0	0	0	4.55602	0	4.68392
PWY-7211	superpathway of pyrimidine deoxyribonucleotides de novo biosynthesis	241.311	12.3212	27.8411	21.9615	33.681	64.9142	45.6166	145.454	107.367	154.453
PWY-7219	adenosine ribonucleotides de novo biosynthesis	292.332	16.2457	34.4109	30.2625	39.208	85.0983	51.6958	193.345	128.269	191.811
PWY-722	nicotinate degradation I	0	0	0	0	0	0	0	0	0	1.8547
PWY-7220	adenosine deoxyribonucleotides de novo biosynthesis II	288.601	15.8023	32.44	27.9742	38.5048	79.1205	50.9763	179.123	124.587	179.169
PWY-7221	guanosine ribonucleotides de novo biosynthesis	260.988	14.6158	30.8681	26.4964	37.6547	73.6879	45.6112	162.635	113.718	172.737
PWY-7222	guanosine deoxyribonucleotides de novo biosynthesis II	288.601	15.8023	32.44	27.9742	38.5048	79.1205	50.9763	179.123	124.587	179.169
PWY-7228	superpathway of guanosine nucleotides de novo biosynthesis I	278.833	15.5148	32.0196	27.5362	39.07	77.592	48.964	172.554	120.509	179.639
PWY-7229	superpathway of adenosine nucleotides de novo biosynthesis I	302.043	16.6244	34.8039	30.65	40.1845	86.2873	53.4003	191.255	130.904	193.251
PWY-7234	inosine-5'-phosphate biosynthesis III	207.417	13.3237	24.2081	20.504	29.3118	61.985	39.3968	130.009	88.2981	134.954
PWY-7237	myo-, chiro- and scillo-inositol degradation	99.7267	7.33333	21.3333	12	7.42	25.2	47.2	115.067	61.1567	75.8867
PWY-7242	D-fructuronate degradation	55.5438	7.25965	12.9185	9.70442	17.0155	21.0978	16.3689	30.0925	25.3775	59.7992
PWY-7254	TCA cycle VII (acetate-producers)	192.058	9.58909	22.0887	19.3391	21.5949	40.3053	48.7697	112.464	76.3193	103.641
PWY-7255	ergothioneine biosynthesis I (bacteria)	40.232	0	4.12844	5.08306	8.2456	11.0418	3.08695	35.4452	4.77096	31.348
PWY-7286	7-(3-amino-3-carboxypropyl)-wyosine biosynthesis	0	0	0	0	0	0	0	1.32026	0	0
PWY-7295	L-arabinose degradation IV	31.6598	1.91712	6.85225	4.58561	0	7.96728	11.7992	28.8758	20.5431	24.7343
PWY-7315	dTDP-N-acetylthomosamine biosynthesis	31.2777	1.60158	1.25248	0	0.395353	2.5443	4.7558	11.6484	6.31064	10.0351
PWY-7323	superpathway of GDP-mannose-derived O-antigen building blocks biosynthesis	202.873	9.41004	23.3677	12.5058	30.848	45.0186	37.0744	116.979	88.1928	126.019
PWY-7328	superpathway of UDP-glucose-derived O-antigen building blocks biosynthesis	144.247	8.37031	15.6711	8.37135	17.4048	43.217	30.2748	79.8386	46.3894	70.1797
PWY-7332	superpathway of UDP-N-acetylglucosamine-derived O-antigen building blocks biosynthesis	49.9046	0	0	3.90287	0	0	3.86985	0	28.2034	21.0205
PWY-7347	sucrose biosynthesis III	6.06706	1.73098	0.488367	1.39369	1.97279	16.2843	2.36429	0	0	3.02239
PWY-7371	1,4-dihydroxy-6-naphthoate biosynthesis II	14.0191	1	2.77667	3.13333	3.11	9.55667	3.33333	5.53846	9.22333	19.423
PWY-7373	superpathway of demethylmenaquinol-6 biosynthesis II	0	0	0	0	0	0	0	0	0	0
PWY-7374	1,4-dihydroxy-6-naphthoate biosynthesis I	10.89	0.666667	1.08696	1.66667	2.87587	5.44049	1.16667	5.45455	6.89406	17.8553
PWY-7376	cob(II)yrinate a,c-diamide biosynthesis II (late cobalt incorporation)	63.0114	2.06803	6.50978	0.805067	13.6651	16.6217	14.4484	40.587	25.3813	53.0143
PWY-7377	cob(II)yrinate a,c-diamide biosynthesis I (early cobalt insertion)	7.68436	0	1.77255	0	0	3.7665	0	0	6.34941	14.995
PWY-7391	isoprene biosynthesis II (engineered)	0.61686	0	0	0	0	0	0	0	0	0
PWY-7392	taxadiene biosynthesis (engineered)	139.557	9.60169	14.0095	16.9215	19.0461	45.8379	12.0189	93.2448	64.3481	108.363
PWY-7400	L-arginine biosynthesis IV (archaebacteria)	241.703	13.1151	28.4392	25.1891	33.9384	68.3331	43.1767	151.785	99.3684	153.445
PWY-7431	aromatic biogenic amine degradation (bacteria)	84.0388	4.24346	14.1809	12.8757	13.7242	18.3794	25.0447	88.863	24.2428	60.1087
PWY-7446	sulfoglycolysis	0	0	0	0	0	0.212507	0	0	0	0
PWY-7456	mannan degradation	2.5788	0	0	0	0	0	0	0	3.93821	4.97971
PWY-7527	L-methionine salvage cycle III	9.39847	1.28519	3.82411	5.84574	0	6.07264	0	0	9.32481	20.2654
PWY-7539	6-hydroxymethyl-dihydropterin diphosphate biosynthesis III (Chlamydia)	259.237	12.9762	23.7748	22.0006	32.172	67.7072	48.4617	148.181	103.174	151.775
PWY-7560	methylerythritol phosphate pathway II	219.73	12.0124	25.0686	22.6735	32.7021	64.3963	41.5498	130.035	91.8155	145.596
PWY-7616	methanol oxidation to carbon dioxide	21.4344	1.92593	1.84847	0	0.318329	3.6073	3.73353	20.557	6.07958	19.6451
PWY-7663	gondoate biosynthesis (anaerobic)	334.012	24.9182	43.6426	32.5038	50.9048	114.134	74.8063	152.28	148.927	208.056
PWY-7664	oleate biosynthesis IV (anaerobic)	239.347	16.3273	25.4055	14.204	26.1992	63.877	58.3277	100.625	83.8699	110.99
PWY-841	superpathway of purine nucleotides de novo biosynthesis I	271.442	15.2131	31.8201	27.6101	38.0946	77.6501	48.4908	166.241	115.862	177.628
PWY-922	mevalonate pathway I	5.81902	0	0	0.536091	0	0	0.579374	2.71028	0	2.11276
PWYG-321	mycolate biosynthesis	253.682	16.9013	26.4297	14.7948	27.407	66.1444	60.6889	105.608	87.0913	116.051
PYRIDNUCSAL-PWY	NAD salvage pathway I	180.346	8.5933	20.4936	15.8566	21.7599	44.5568	36.9228	102.429	69.3277	108.593
PYRIDNUCSYN-PWY	NAD biosynthesis I (from aspartate)	206.246	9.05552	25.5976	20.7255	26.5902	58.8762	38.4992	136.008	87.319	134.637
PYRIDOXSYN-PWY	pyridoxal 5'-phosphate biosynthesis I	121.649	3.73695	9.27178	6.18947	10.5922	24.646	33.6759	59.0822	54.7727	43.451
REDCITCYC	TCA cycle VIII (helicobacter)	260.407	12.6759	36.8141	29.6609	42.936	75.0324	51.116	162.992	126.638	202.737
RHAMCAT-PWY	L-rhamnose degradation I	10.1375	0	2.62285	0	6.92515	1.94175	2.28745	14.8133	6.04305	17.1815
RIBOSYN2-PWY	flavin biosynthesis I (bacteria and plants)	244.679	14.1382	29.4762	26.562	34.9326	74.1858	44.9417	148.029	105.981	164.561
RUMP-PWY	formaldehyde oxidation I	7.75369	1.58144	4.97863	6.24944	0	7.76401	0	5.32612	0	25.5463
SALVADEHYPOX-PWY	adenosine nucleotides degradation II	229.162	14.9189	33.9471	23.1186	33.6078	67.7148	67.5954	173.65	109.722	171.921
SER-GLYSYN-PWY	superpathway of L-serine and glycine biosynthesis I	293.064	17.0424	30.7719	30.4292	37.1087	86.1976	54.3155	170.279	124.293	197.149
SO4ASSIM-PWY	sulfate reduction I (assimilatory)	231.102	11.348	25.7358	18.0374	24.2402	63.7528	49.3909	147.066	83.0709	129.142
SUCSYN-PWY	sucrose biosynthesis I (from photosynthesis)	17.7306	3.29172	1.4657	3.43252	4.77215	26.8247	6.05414	0	0	8.87463
SULFATE-CYS-PWY	superpathway of sulfate assimilation and cysteine biosynthesis	249.243	13.6562	29.1505	22.5297	29.0132	68.9944	52.123	159.567	98.1099	152.541
TCA	TCA cycle I (prokaryotic)	316.563	17.7038	38.3642	32.9958	44.6594	89.6708	60.2436	199.398	138.17	211.371
TCA-GLYOX-BYPASS	superpathway of glyoxylate bypass and TCA	211.279	14.1432	25.335	22.3124	25.5021	58.6644	45.5059	112.841	83.1935	126.992
TEICHOICACID-PWY	teichoic acid (poly-glycerol) biosynthesis	11.8746	0	2.30104	0	6.22485	3.80172	0	0	0	14.0811
THISYN-PWY	superpathway of thiamin diphosphate biosynthesis I	101.411	4.37788	3.65202	14.5701	14.0526	50.5577	23.1816	62.0568	46.3962	79.3084
THREOCAT-PWY	superpathway of L-threonine metabolism	0	0	0	0	0	0	0	0	0	0
THRESYN-PWY	superpathway of L-threonine biosynthesis	270.499	14.9514	32.5213	28.5205	35.9977	79.439	49.2411	180.75	119.441	175.454
TRNA-CHARGING-PWY	tRNA charging	231.427	12.5101	27.53	23.2924	29.9939	65.6451	44.1038	137.866	105.763	151.799
TRPSYN-PWY	L-tryptophan biosynthesis	262.885	15.1143	31.3594	26.4798	36.4727	74.1659	48.1404	162.513	113.072	168.038
TYRFUMCAT-PWY	L-tyrosine degradation I	108.118	6.67284	16.666	9.15	11.7733	30.2565	34.1354	65.4448	54.5144	61.2096
UBISYN-PWY	superpathway of ubiquinol-8 biosynthesis (prokaryotic)	171.394	8.3346	15.8369	11.0135	14.2569	37.8938	37.6255	83.5715	57.9369	76.582
UDPNAGSYN-PWY	UDP-N-acetyl-D-glucosamine biosynthesis I	266.057	13.1862	31.3136	25.5787	33.2572	73.2173	46.7958	172.601	104.676	160.274
VALDEG-PWY	L-valine degradation I	5.27055	0	0	0	0	0	2.80518	0	0.657923	4.86359
VALSYN-PWY	L-valine biosynthesis	394.426	22.3141	54.3499	38.594	57.4659	106.42	70.4744	256.361	166.224	265.761

## Sheet: Enzymes
function	description	Egg	1dph	3dph	5dph	7dph	10dph	12dph	20dph	25dph	Gut
EC:1.1.1.1	Alcohol dehydrogenase	659.113	41.58	79.2167	67.2567	89.48	178.323	141.35	428.867	231.587	403.668
EC:1.1.1.100	3-oxoacyl-[acyl-carrier-protein] reductase	1202.59	67.9667	151.767	136.28	176.1	325.34	218.75	690	488.693	852.742
EC:1.1.1.102	3-dehydrosphinganine reductase	0	0	0	0	0	0	0	0	0	0
EC:1.1.1.103	L-threonine 3-dehydrogenase	37.2833	2.86	0.833333	1.4	2.64333	17.7	10.45	17.0667	18.9333	20.1117
EC:1.1.1.105	All-trans-retinol dehydrogenase (NAD(+))	0	0	0	0	0	0	0	0	0	0
EC:1.1.1.108	Carnitine 3-dehydrogenase	37.3333	0	2	0.666667	0	2.33333	12	12.6667	15.6667	13
EC:1.1.1.11	D-arabinitol 4-dehydrogenase	8.33333	0	0	0	0	1.33333	0	0	6.33333	7.33333
EC:1.1.1.122	D-threo-aldose 1-dehydrogenase	42.3033	2.33333	6.44333	3.33333	5.11	6.44333	8.5	23.3333	6.39	20.1533
EC:1.1.1.125	2-deoxy-D-gluconate 3-dehydrogenase	22.75	4.86	5.5	6.51	9	20.1667	4.41667	12.3333	1.66667	29.9067
EC:1.1.1.130	3-dehydro-L-gulonate 2-dehydrogenase	0	0	0	0	0	0.166667	0	0	1.22333	0
EC:1.1.1.132	GDP-mannose 6-dehydrogenase	23.6667	2	5	2.33333	3.11	4.33333	9.66667	12.6667	8	11.3333
EC:1.1.1.133	dTDP-4-dehydrorhamnose reductase	252.773	10.6667	30.1633	22.5567	27.11	60.11	47	174.5	116.78	141.51
EC:1.1.1.136	UDP-N-acetylglucosamine 6-dehydrogenase	47.2767	2.33333	7.11	5.55667	5.33333	8.89	2.66667	26.3333	17.0567	31.0833
EC:1.1.1.137	Ribitol-5-phosphate 2-dehydrogenase	0	0	0	0	0	0	0	1	0	0
EC:1.1.1.14	L-iditol 2-dehydrogenase	64.8333	2	13.6667	5.66667	13	16.6667	4.66667	28.3333	25	70.9167
EC:1.1.1.140	Sorbitol-6-phosphate 2-dehydrogenase	1.53333	0	0	0	0.2	0.366667	2.53333	4.73333	2.26667	3.9
EC:1.1.1.145	3-beta-hydroxy-Delta(5)-steroid dehydrogenase	2.66667	0	0	0	1	0	0	0	0	0.5
EC:1.1.1.157	3-hydroxybutyryl-CoA dehydrogenase	217.973	15	30.4433	31.78	41.4167	74.6433	41.7	134.9	87.94	189.928
EC:1.1.1.159	7-alpha-hydroxysteroid dehydrogenase	10.8867	0.666667	0.333333	0	1	1.83333	5.33333	5.66667	2.78	2.5
EC:1.1.1.163	Cyclopentanol dehydrogenase	0	0	0	0	0	0	0.5	0	0	0
EC:1.1.1.169	2-dehydropantoate 2-reductase	232.843	9.86	19.2767	18.6267	28.9533	49.8433	36.3167	82.8	85.8667	147.623
EC:1.1.1.17	Mannitol-1-phosphate 5-dehydrogenase	6.45	2.19333	1.66667	4.84333	0.2	13.7	2.78333	4.73333	6.93333	12.6117
EC:1.1.1.170	(decarboxylating)	0	0	0	0	0	0	0	0	0	0.5
EC:1.1.1.173	L-rhamnose 1-dehydrogenase	0	0	0.666667	0	0	0	0	0	0	0
EC:1.1.1.18	Inositol 2-dehydrogenase	99.7267	6	21.3333	12	4.53	20.8667	47.2	115.067	61.1567	75.8867
EC:1.1.1.193	5-amino-6-(5-phosphoribosylamino)uracil reductase	239.39	12.86	29.3867	25.79	38.7533	67.7	42.1167	145.233	99.4933	161.898
EC:1.1.1.2	Alcohol dehydrogenase (NADP(+))	1.77667	0.333333	0.443333	0	1	0.443333	0	0	2.33333	1.27833
EC:1.1.1.202	1,3-propanediol dehydrogenase	0	0	0	0	0	0	0	0	0	0
EC:1.1.1.203	Uronate dehydrogenase	34.5267	1.66667	10.11	3.66667	2.77667	9.89	16.6667	37.6667	18.89	32.375
EC:1.1.1.205	IMP dehydrogenase	267.223	15.5267	31.0533	28.4	42.1967	77.7	44.95	175.567	117.66	197.065
EC:1.1.1.206	Tropinone reductase I	18.4433	0.333333	0.943333	0	1	1.44333	3.66667	5	3.33333	2.52833
EC:1.1.1.21	Aldehyde reductase	0	0	0	0	0	0	0	0	2.33333	0
EC:1.1.1.215	Gluconate 2-dehydrogenase	68.2	2	7.16667	3.66667	1.2	9.36667	25.2	46.4	36.2667	34.65
EC:1.1.1.216	Farnesol dehydrogenase	0	0	0	0	0	0	0	0	2.33333	0
EC:1.1.1.219	Dihydrokaempferol 4-reductase	77.5533	1.33333	4.77667	3.78	2	2.55667	13	63	31.5567	27.8333
EC:1.1.1.22	UDP-glucose 6-dehydrogenase	252.723	12.5267	30.3867	24.5667	31.42	76.2	46.95	158.9	115.103	158.282
EC:1.1.1.23	Histidinol dehydrogenase	235.89	12.86	27.3867	24.5667	31.6433	66.0333	42.1167	147.233	104.437	152.523
EC:1.1.1.243	Carveol dehydrogenase	0	0	0	0	0	0	0	0	0	0
EC:1.1.1.25	Shikimate dehydrogenase	311.08	17.86	37.4967	28.9	40.6433	96.2567	69.7833	188.567	130.997	212.218
EC:1.1.1.251	Galactitol-1-phosphate 5-dehydrogenase	0	0	0	0	0	0.333333	0	0	0	0
EC:1.1.1.26	Glyoxylate reductase	67.8033	4.66667	13.4433	9	11	20.5567	7.83333	22	22.9467	47.125
EC:1.1.1.261	sn-glycerol-1-phosphate dehydrogenase	16.6667	0	1.66667	1.66667	0.11	2	0.666667	10.3333	3.33333	15.7783
EC:1.1.1.262	4-hydroxythreonine-4-phosphate dehydrogenase	189.307	11.1933	20.3867	13.7333	23.5333	45.2	41.2833	81.4	80.9367	101.857
EC:1.1.1.264	L-idonate 5-dehydrogenase (NAD(P)(+))	15.5267	0	0	0	0.11	2	0	0	6.33333	9.20833
EC:1.1.1.267	1-deoxy-D-xylulose-5-phosphate reductoisomerase	217.087	11.86	27.2767	23.6767	31.6433	65.9233	39.2833	129.233	91.4367	143.162
EC:1.1.1.27	L-lactate dehydrogenase	19.36	2.52667	3.44333	5.34333	3.33333	13.2233	1.91667	29.8333	21.67	35.3783
EC:1.1.1.271	GDP-L-fucose synthase	64.4133	3.19333	4.55333	3.17667	6.66667	14.3333	12.25	38	27.8367	38.3033
EC:1.1.1.275	(+)-trans-carveol dehydrogenase	2.66667	0	0	0	1	0	0	0	0	0.5
EC:1.1.1.276	Serine 3-dehydrogenase (NADP(+))	20.6667	0	1.16667	0	1.66667	1.33333	4.16667	5	3.33333	4.75
EC:1.1.1.28	D-lactate dehydrogenase	121.287	6.72	13.1667	8.35333	5.4	24.7333	39.2333	83.1333	35.98	39.585
EC:1.1.1.281	GDP-4-dehydro-6-deoxy-D-mannose reductase	34.1633	0.333333	3.44333	0.666667	2	3.72333	9.33333	33	12.2233	15.3617
EC:1.1.1.282	Quinate/shikimate dehydrogenase	0	0	0	0	0	0.166667	0	0	0	0
EC:1.1.1.284	S-(hydroxymethyl)glutathione dehydrogenase	262.14	12.86	21.5	19.0667	25.8633	53.0333	51.7833	143.067	66.1567	124.653
EC:1.1.1.289	Sorbose reductase	0.443333	0	0	0	0	0	0	0	0	0
EC:1.1.1.29	Glycerate dehydrogenase	64.5	3.52667	8	4.84333	1.66667	16.3333	19.25	36.6667	27.1667	19.845
EC:1.1.1.290	4-phosphoerythronate dehydrogenase	52.7833	1.52667	2	1.84333	2.53333	13.0333	12.45	17.4	18.7667	10.1117
EC:1.1.1.291	2-hydroxymethylglutarate dehydrogenase	0	0	0	0	0	0	0	0	0	0
EC:1.1.1.292	1,5-anhydro-D-fructose reductase (1,5-anhydro-D-mannitol-forming)	13.3033	1.33333	4.66667	3	0	3.66667	10.3333	24	9.22333	13.0417
EC:1.1.1.298	3-hydroxypropionate dehydrogenase (NADP(+))	0	0	0	0	0	0	0	0	0	0
EC:1.1.1.3	Homoserine dehydrogenase	270.033	15.3867	30.9967	27.0767	35.8433	81.1767	52.0667	173.633	123.483	168.288
EC:1.1.1.30	3-hydroxybutyrate dehydrogenase	157.637	9.66667	16.5	14.3333	15.11	30.8333	31	55	47.4467	93.7083
EC:1.1.1.300	NADP-retinol dehydrogenase	0	0	0	0	0	0	0	0	0	0
EC:1.1.1.302	2,5-diamino-6-(ribosylamino)-4(3H)-pyrimidinone 5'-phosphate reductase	0	0	0	0	0	0	0	1	0	0.5
EC:1.1.1.303	Diacetyl reductase ((R)-acetoin forming)	28.4167	1.66667	1.66667	1	1.33333	4.66667	5	12.6667	9.33333	16.2083
EC:1.1.1.304	Diacetyl reductase ((S)-acetoin forming)	19.5033	0.666667	0	0	2.2	2.2	4.2	4.73333	2.26667	14.9417
EC:1.1.1.305	UDP-glucuronic acid oxidase (UDP-4-keto-hexauronic acid decarboxylating)	0.866667	0	0	0	0.2	0.366667	2.53333	4.73333	2.26667	1.4
EC:1.1.1.306	S-(hydroxymethyl)mycothiol dehydrogenase	12.8333	1.33333	1.66667	2.16667	6.22	4.33333	1.66667	12.3333	2.66667	16.75
EC:1.1.1.307	D-xylose reductase	0	0	0	0	0	0	0	0	0	0
EC:1.1.1.308	Sulfopropanediol 3-dehydrogenase	22.3333	0	0.333333	0	1	1.66667	2.33333	1	2.66667	6.945
EC:1.1.1.31	3-hydroxyisobutyrate dehydrogenase	332.163	22.2467	40.7767	28.1967	42.11	89.39	79.25	164.667	115.17	176.593
EC:1.1.1.310	(S)-sulfolactate dehydrogenase	5.11	0.333333	0.443333	0	0	0.89	1.33333	0	2.22333	4.16667
EC:1.1.1.312	2-hydroxy-4-carboxymuconate semialdehyde hemiacetal dehydrogenase	0	0	0	0	0	0	0	0	1.33333	0
EC:1.1.1.313	Sulfoacetaldehyde reductase	0	0	0	0	0	0	0	0	0	0
EC:1.1.1.316	L-galactose 1-dehydrogenase	0	0	0	0	0	0	0	0	0	0.221667
EC:1.1.1.320	Benzil reductase ((S)-benzoin forming)	0	0	0	0	0	0.5	0	0	0.833333	0
EC:1.1.1.328	Nicotine blue oxidoreductase	24.6667	0	1.66667	4	6.11	3.66667	1.66667	11.6667	2.66667	21.6667
EC:1.1.1.333	Decaprenylphospho-beta-D-erythro-pentofuranosid-2-ulose 2-reductase	3.16667	0	0	0.5	1.11	0	1	15.6667	0	3.41667
EC:1.1.1.335	UDP-N-acetyl-2-amino-2-deoxyglucuronate dehydrogenase	3.33333	0	0	0	0.666667	0	0	0	13.0567	1.33333
EC:1.1.1.336	UDP-N-acetyl-D-mannosamine dehydrogenase	25.8667	2.33333	2.33333	8	3.2	8.03333	3.03333	31.4	9.6	22.4
EC:1.1.1.338	(2R)-3-sulfolactate dehydrogenase (NADP(+))	9.33333	0	0	0	0	0	2.33333	0	1.33333	2.5
EC:1.1.1.339	dTDP-6-deoxy-L-talose 4-dehydrogenase (NAD(+))	8	0	1.66667	0.666667	0	0.666667	4	11.6667	6	4.5
EC:1.1.1.34	Hydroxymethylglutaryl-CoA reductase (NADPH)	1.91667	0.193333	0	0.176667	0	0	0.25	0	0	0.378333
EC:1.1.1.343	Phosphogluconate dehydrogenase (NAD(+)-dependent, decarboxylating)	176.863	9.52667	21.9433	16.1233	26.8633	51.9233	29.45	130.733	82.2167	131.182
EC:1.1.1.346	2,5-didehydrogluconate reductase (2-dehydro-L-gulonate-forming)	95.87	4	7	3.5	8.06667	17.0667	31.7333	60.8	28.59	39.5917
EC:1.1.1.35	3-hydroxyacyl-CoA dehydrogenase	349.397	18.0533	38.8867	25.19	44.8433	92.0667	68.9	139.8	105.203	176.335
EC:1.1.1.350	Ureidoglycolate dehydrogenase (NAD(+))	0	0	0	0	0	0.166667	0	0	0	0
EC:1.1.1.36	Acetoacetyl-CoA reductase	102.917	7.52667	14.6667	8.84333	9	32	30.4167	67	45.5	61.295
EC:1.1.1.363	Glucose-6-phosphate dehydrogenase (NAD(P)(+))	277.863	12.1933	29.9433	19.79	34.0867	63.59	51.1167	168.733	89.27	156.32
EC:1.1.1.367	UDP-2-acetamido-2,6-beta-L-arabino-hexul-4-ose reductase	0	0	0	0	0	0	0	0	1	0.833333
EC:1.1.1.369	D-chiro-inositol 1-dehydrogenase	99.7267	6	21.3333	12	4.53	20.8667	47.2	115.067	61.1567	75.8867
EC:1.1.1.37	Malate dehydrogenase	183.447	11.5267	24.72	21.5667	32.31	61.3667	31.45	111.067	83.27	136.148
EC:1.1.1.371	Scyllo-inositol 2-dehydrogenase (NADP(+))	0	0	0	0	0	0	0	0	0	0.111667
EC:1.1.1.373	Sulfolactaldehyde 3-reductase	0.666667	0	0	0	0	0.166667	0	0	1	0
EC:1.1.1.374	UDP-N-acetylglucosamine 3-dehydrogenase	0	0	0	0	0	0	0	0	0	0.5
EC:1.1.1.376	L-arabinose 1-dehydrogenase (NAD(P)(+))	1.11	0	0.666667	0	0	0	1	0	0.556667	0.166667
EC:1.1.1.377	L-rhamnose 1-dehydrogenase (NADP(+))	0	0	0.666667	0	0	0	0	0	0	0
EC:1.1.1.378	L-rhamnose 1-dehydrogenase (NAD(P)(+))	0	0	0.666667	0	0	0	0	0	0	0
EC:1.1.1.38	Malate dehydrogenase (oxaloacetate-decarboxylating)	99.2833	7.52667	8.33333	13.4	21.7533	50.2	12.45	103.233	34.3233	91.5283
EC:1.1.1.380	L-gulonate 5-dehydrogenase	0.866667	0	0	0	0.2	0.366667	2.53333	4.73333	2.26667	1.4
EC:1.1.1.381	3-hydroxy acid dehydrogenase	11.9767	0	0	0.223333	0.2	0.366667	2.53333	4.73333	8.6	6.23333
EC:1.1.1.39	Malate dehydrogenase (decarboxylating)	0	0	0	0	0	0	0	0	0	0
EC:1.1.1.4	(R,R)-butanediol dehydrogenase	28.4167	1.66667	1.66667	1	1.33333	4.66667	5	12.6667	9.33333	16.2083
EC:1.1.1.40	Malate dehydrogenase (oxaloacetate-decarboxylating) (NADP(+))	161.417	13.86	21.9433	14.7333	20.2	48.9767	43.6167	74.4	81.8267	93.2733
EC:1.1.1.41	Isocitrate dehydrogenase (NAD(+))	24.4967	0.666667	6.72	1.89	2.33333	11.1133	6.33333	5	10.1133	18.2217
EC:1.1.1.42	Isocitrate dehydrogenase (NADP(+))	235.697	14.1933	28.0533	24.5667	28.31	61.8667	56.2833	164.733	123.27	160.398
EC:1.1.1.43	Phosphogluconate 2-dehydrogenase	22.3333	1.33333	6.66667	3.66667	0	6	14.6667	36.6667	15	16.1667
EC:1.1.1.44	Phosphogluconate dehydrogenase (NADP(+)-dependent, decarboxylating)	176.863	9.52667	21.9433	16.1233	26.8633	51.9233	29.45	130.733	82.2167	131.182
EC:1.1.1.47	Glucose 1-dehydrogenase (NAD(P)(+))	36.22	0.333333	1.66667	2.66667	1.44333	4	8.33333	31.3333	21.78	19.7217
EC:1.1.1.48	D-galactose 1-dehydrogenase	4.52667	2	3.66667	1.66667	5.33333	5.33333	1.5	0	0.556667	6.375
EC:1.1.1.49	Glucose-6-phosphate dehydrogenase (NADP(+))	277.863	12.1933	29.9433	19.79	34.0867	63.59	51.1167	168.733	89.27	156.32
EC:1.1.1.51	3(or 17)-beta-hydroxysteroid dehydrogenase	1.66667	0	0	0	0	0	0	0	0	1.83333
EC:1.1.1.53	3-alpha(or 20-beta)-hydroxysteroid dehydrogenase	33.3333	4	2	4	14.11	12.3333	4	18.3333	0.333333	34.8333
EC:1.1.1.56	Ribitol 2-dehydrogenase	5.11	0	1.66667	0	0	0	1	0	0.556667	3.5
EC:1.1.1.57	Fructuronate reductase	24.2267	2.19333	4	3.51	8.2	5.03333	6.61667	13.0667	4.15667	16.945
EC:1.1.1.58	Tagaturonate reductase	16.86	1.66667	1.11	1.33333	4.66667	4.61	1	1.66667	11.0567	15.2867
EC:1.1.1.6	Glycerol dehydrogenase	29.7833	1.19333	1.66667	0.676667	0.2	5.7	8.11667	26.7333	7.15667	12.8617
EC:1.1.1.60	2-hydroxy-3-oxopropionate reductase	120.2	7.66667	18.3333	13.3333	11.31	32.2	31.5333	88.7333	47.1	77.2333
EC:1.1.1.61	4-hydroxybutyrate dehydrogenase	1.33333	0	0	0	0	0.166667	0	0	1	0
EC:1.1.1.65	Pyridoxine 4-dehydrogenase	0	0	0	0	0	0	0	0	0	0
EC:1.1.1.67	Mannitol 2-dehydrogenase	46.1933	2	8.33333	3.66667	0	6	21	37.6667	18	21.875
EC:1.1.1.69	Gluconate 5-dehydrogenase	31.17	3.66667	4.11	3	8.08667	17.2567	7.2	10.7333	20.88	30.1583
EC:1.1.1.76	(S,S)-butanediol dehydrogenase	19.5033	0.666667	0	0	2.2	2.2	4.2	4.73333	2.26667	14.9417
EC:1.1.1.77	Lactaldehyde reductase	0.666667	0	0	0	0	0.166667	0	0	1.33333	2.33333
EC:1.1.1.79	Glyoxylate reductase (NADP(+))	84.03	5	10.11	5.33333	8.2	17.4767	22.8667	42.4	40.1567	58.1783
EC:1.1.1.8	Glycerol-3-phosphate dehydrogenase (NAD(+))	1.66667	0	0	0	0	0	0	0	0	0
EC:1.1.1.81	Hydroxypyruvate reductase	171.443	10.6667	23.8867	11.5567	18.2	37.3667	47.8667	101.4	74.1033	120.525
EC:1.1.1.82	Malate dehydrogenase (NADP(+))	0	0	0	0	0	0	0	0	0	0
EC:1.1.1.83	D-malate dehydrogenase (decarboxylating)	85.1667	3.33333	10	6	7.33333	16.5	16	43.3333	31.3333	53.9717
EC:1.1.1.85	3-isopropylmalate dehydrogenase	241.14	12.86	27.3867	24.5667	30.9767	64.3667	41.95	152.9	104.77	151.26
EC:1.1.1.86	Ketol-acid reductoisomerase (NADP(+))	228.807	12.86	26.72	24.3433	32.6433	65.3667	40.95	152.233	103.77	146.482
EC:1.1.1.87	Homoisocitrate dehydrogenase	1	0	0	0	0	0	0	5.66667	1.16667	2.16667
EC:1.1.1.88	Hydroxymethylglutaryl-CoA reductase	20.7767	0.333333	1.44333	0.89	1	2.77667	2	23	18	12.7783
EC:1.1.1.9	D-xylulose reductase	4	0	1.66667	0	0	1.33333	0	0	0	9.16667
EC:1.1.1.90	Aryl-alcohol dehydrogenase	7.33333	1.33333	0	1.33333	3.44333	4	0.666667	6.33333	0	9.16667
EC:1.1.1.91	Aryl-alcohol dehydrogenase (NADP(+))	4.66667	0	0	0	0	0	1	0	0	1.66667
EC:1.1.1.93	Tartrate dehydrogenase	85.1667	3.33333	10	6	7.33333	16.5	16	43.3333	31.3333	53.9717
EC:1.1.1.94	Glycerol-3-phosphate dehydrogenase (NAD(P)(+))	227.557	12.86	27.72	23.4567	32.31	64.5333	39.95	141.233	96.3267	154.398
EC:1.1.1.95	Phosphoglycerate dehydrogenase	325.05	20.5267	44.6033	33.1233	50.8633	99.7567	49.95	181.567	157.11	254.288
EC:1.1.2.3	L-lactate dehydrogenase (cytochrome)	94.5867	6.86	10.6667	4.84333	15.5333	18.0333	25.95	42.7333	25.49	49.4583
EC:1.1.2.4	D-lactate dehydrogenase (cytochrome)	45.6367	6.33333	9	7	8.66667	15.6667	12.6667	25	21.5567	52.4583
EC:1.1.2.6	Polyvinyl alcohol dehydrogenase (cytochrome)	0	0	0	0	0	0	0	0	0	0.5
EC:1.1.2.7	Methanol dehydrogenase (cytochrome c)	6	0	0	0	0	0	0	0	0	2.66667
EC:1.1.2.8	Alcohol dehydrogenase (cytochrome c)	67.4433	2	15.3333	4.33333	5.33333	16.3333	30.3333	49.3333	24.3333	35.8333
EC:1.1.3.15	(S)-2-hydroxy-acid oxidase	200.47	9.33333	25.11	15.5567	32.22	46.0567	35	140.333	70.5033	140.458
EC:1.1.3.17	Choline oxidase	0	0	0	0	0	0	0	0	0	0
EC:1.1.3.21	Glycerol-3-phosphate oxidase	0	0	0	0	0	0	0	0	0	0
EC:1.1.3.37	D-arabinono-1,4-lactone oxidase	4.66667	0	0	0	0	0	0	0	0	1.66667
EC:1.1.3.41	Alditol oxidase	9.33333	0	0	1.66667	2.77667	0	0	5.33333	1.22333	5.5
EC:1.1.3.45	Aclacinomycin-N oxidase	0	0	0	0	0	0	0	0	0	0
EC:1.1.3.46	4-hydroxymandelate oxidase	20.6667	0	2.66667	3.55667	1.66667	2.66667	0	5.33333	0	15.8333
EC:1.1.3.47	5-(hydroxymethyl)furfural oxidase	8.33333	0	0	0	0	0	0	0	6.33333	5.33333
EC:1.1.3.48	3-deoxy-alpha-D-manno-octulosonate 8-oxidase	1.77667	0.333333	1.11	0	1	1.11	0	0	2.33333	1.945
EC:1.1.3.6	Cholesterol oxidase	54	0	4	4.22333	7.22	3.33333	8.33333	56.6667	8.66667	34.8333
EC:1.1.3.8	L-gulonolactone oxidase	14.3333	0	0	2.66667	0	0	0	11.3333	0	6.5
EC:1.1.5.2	Quinoprotein glucose dehydrogenase (PQQ, quinone)	93.8867	5.33333	18.22	5.33333	8.86667	21.0333	35.5333	52.7333	35.38	46.8033
EC:1.1.5.3	Glycerol-3-phosphate dehydrogenase	289.1	19.5267	30.7767	31.6233	37.13	106.357	62.2167	199.767	106.46	191.283
EC:1.1.5.4	Malate dehydrogenase (quinone)	120.92	5.33333	11.11	10.1667	11.2	19.1433	31.5333	60.4	41.3233	48.595
EC:1.1.5.6	Formate dehydrogenase-N	0	0	0	0	0	0.333333	0	0.666667	0	0
EC:1.1.5.8	Quinate dehydrogenase (quinone)	18.2	1.33333	5.33333	3	0.2	7.2	14.5333	30.7333	11.6	14.0667
EC:1.1.9.1	Alcohol dehydrogenase (azurin)	11.6667	0.666667	0.333333	0	0.333333	3	1.33333	1	0.333333	5.16667
EC:1.1.98.2	Glucose-6-phosphate dehydrogenase (coenzyme-F420)	8.66667	0	0	0	1	0	1	6.33333	0	3.33333
EC:1.1.98.3	Decaprenylphospho-beta-D-ribofuranose 2-dehydrogenase	3.16667	0	0	0.5	1.11	0	1	15.6667	0	2.25
EC:1.1.99.1	Choline dehydrogenase	223.28	7.52667	21.8333	10.0667	16.0867	31.5333	61.1167	109.733	81.6033	104.195
EC:1.1.99.2	L-2-hydroxyglutarate dehydrogenase	8.16667	0	0	1	1.33333	0.833333	0	11.3333	0	3.75
EC:1.1.99.21	D-sorbitol dehydrogenase (acceptor)	10.3333	0	1.66667	0.666667	0	2.66667	5	11.6667	7.33333	7.33333
EC:1.1.99.24	Hydroxyacid-oxoacid transhydrogenase	3.16667	0	0	0	1.33333	0.833333	0	0	0	1.41667
EC:1.1.99.28	Glucose-fructose oxidoreductase	1.77667	0.333333	1.61	0	2.33333	1.77667	0	0	1.22333	2.08333
EC:1.1.99.3	Gluconate 2-dehydrogenase (acceptor)	35.23	3.33333	9.33333	6.66667	0.4	13.0667	23.7333	56.8	26.5333	33.8833
EC:1.1.99.31	(S)-mandelate dehydrogenase	0	0	0	0	0	2.66667	0	0	0	6.5
EC:1.10.2.2	Quinol--cytochrome-c reductase	117.22	6.86	12.5	6.51	10.6667	26.1667	27.75	42.6667	35.2233	43.92
EC:1.10.3.11	Ubiquinol oxidase (non-electrogenic)	1.33333	0	0	0	0	0	0	0	0	0.833333
EC:1.10.3.12	Menaquinol oxidase (H(+)-transporting)	30.6667	14.6667	8	24	18.6667	38.6667	0	0	9.33333	90.6667
EC:1.10.3.3	L-ascorbate oxidase	24.6667	0	0	0	1	0	0	0	0	3.16667
EC:1.10.9.1	Plastoquinol--plastocyanin reductase	29.3333	1	0	0	0.666667	1	2.66667	19.6667	3	8.27833
EC:1.11.1.1	NADH peroxidase	0	0	0	0	0	0	0	0	0	0
EC:1.11.1.10	Chloride peroxidase	90.97	3.33333	16.1667	7.66667	7.33333	16.6667	29.8333	66	31.3333	43.125
EC:1.11.1.15	Peroxiredoxin	577.337	27.9133	58.4367	56.0933	62.5967	143.043	110.683	338.033	279.813	357.165
EC:1.11.1.19	Dye decolorizing peroxidase	4.66667	1.33333	0	2.16667	0.11	1.66667	0.666667	6	0	5.91667
EC:1.11.1.21	Catalase peroxidase	106.977	5.72	7.94333	5.35333	15.31	38.1433	21.3667	59.4	38.99	49.3517
EC:1.11.1.5	Cytochrome-c peroxidase	119.077	13.58	26.83	16.9433	14.3333	57.7233	52.75	90	78.0033	108.33
EC:1.11.1.6	Catalase	228.363	20.3867	39.61	32.41	34.0867	60.31	72.7	163.4	113.713	180.933
EC:1.11.1.9	Glutathione peroxidase	251.003	12.1933	26.11	20.0667	27.6433	57.09	72.2833	128.067	103.66	138.933
EC:1.11.2.4	Fatty-acid peroxygenase	7.66667	1.33333	0	3	2.33333	2.66667	0	5.33333	0	10.6667
EC:1.12.1.2	Hydrogen dehydrogenase	8	0	1.33333	0	1.33333	0	0	30.6667	15.3333	9.66667
EC:1.12.1.3	Hydrogen dehydrogenase (NADP(+))	27	0	2.66667	2.33333	4	2.33333	0	73.6667	33.3333	14.6667
EC:1.12.2.1	Cytochrome-c3 hydrogenase	0	0	0	0	0	0	0	0	0	0.666667
EC:1.12.5.1	Hydrogen:quinone oxidoreductase	0.666667	2.66667	0	2	0	20.6667	0	0	0	0
EC:1.12.7.2	Ferredoxin hydrogenase	0.666667	0	0	0	0	0	0	0	0	1
EC:1.12.98.1	Coenzyme F420 hydrogenase	23	1	0	0	0	2	2.66667	29.6667	3	5.83333
EC:1.12.99.6	Hydrogenase (acceptor)	26.6667	0	0	0	4.88667	3	1.33333	18	9.5	8.72333
EC:1.13.11.1	Catechol 1,2-dioxygenase	46	2	2.66667	0.666667	0.11	11.6667	12.3333	19.6667	16.3333	23.1667
EC:1.13.11.11	Tryptophan 2,3-dioxygenase	73.7767	7.33333	15.2767	11.89	16.4433	24.61	18	42	38.7233	71.25
EC:1.13.11.14	2,3-dihydroxybenzoate 3,4-dioxygenase	3	0	0.333333	0	0	1.66667	4	1	0.333333	1
EC:1.13.11.15	3,4-dihydroxyphenylacetate 2,3-dioxygenase	8	0	1.66667	0.666667	0	0.833333	4	12	6	4.5
EC:1.13.11.16	3-carboxyethylcatechol 2,3-dioxygenase	2.66667	0	0	0	1	1.5	1	0	0	4.16667
EC:1.13.11.2	Catechol 2,3-dioxygenase	79.08	12	8.11	13.3333	26.6667	33.7767	6.66667	29.6667	7.11333	84.515
EC:1.13.11.20	Cysteine dioxygenase	0.666667	0	0	0.666667	0	0	0	0	0	0.333333
EC:1.13.11.25	dioxygenase	12.3333	0	2	0	6	4.33333	2.33333	12	0.333333	10.5
EC:1.13.11.27	4-hydroxyphenylpyruvate dioxygenase	165.22	11.86	21.3867	11.4	20.5533	40.1667	40.4167	92.6667	72.28	96.67
EC:1.13.11.3	Protocatechuate 3,4-dioxygenase	118.247	7.19333	11.4433	10.1767	16.8867	27.5567	30.5833	48	40.2267	69.1567
EC:1.13.11.33	Arachidonate 15-lipoxygenase	0	0	0	0	0	1.33333	0	0	0	3.83333
EC:1.13.11.37	Hydroxyquinol 1,2-dioxygenase	7.66667	0	0.333333	0	0	3	1.33333	1	0.333333	6.33333
EC:1.13.11.4	Gentisate 1,2-dioxygenase	9.66667	1.33333	0.666667	1.33333	2.66667	7.33333	2.66667	2.33333	1.33333	14.5
EC:1.13.11.41	2,4'-dihydroxyacetophenone dioxygenase	0	0	0	0	0	0	0	0	0	0
EC:1.13.11.46	4-hydroxymandelate synthase	0	0	0	0	0	0	0	0	0	0
EC:1.13.11.49	Chlorite O(2)-lyase	56.11	4	7.77667	10.0567	15.7767	26.39	4.33333	40	19.0567	60.695
EC:1.13.11.5	Homogentisate 1,2-dioxygenase	103.027	6.52667	15.9433	9.06667	17.4433	30.2767	29.0833	54	46.39	67.9617
EC:1.13.11.52	Indoleamine 2,3-dioxygenase	1.66667	0	0	0	0	0	0.5	0	0	0.333333
EC:1.13.11.53	Acireductone dioxygenase (Ni(2+)-requiring)	68.9767	0.666667	4.5	5	1.2	6.53333	17.0333	27.0667	18.2667	21.9833
EC:1.13.11.54	Acireductone dioxygenase (Fe(2+)-requiring)	68.9767	0.666667	4.5	5	1.2	6.53333	17.0333	27.0667	18.2667	21.9833
EC:1.13.11.57	Gallate dioxygenase	3	0	0.333333	0	0	1.66667	1.33333	1	0.333333	1
EC:1.13.11.6	3-hydroxyanthranilate 3,4-dioxygenase	25.5267	0.333333	1.61	1.66667	1	1.44333	5.33333	6.33333	14.39	7.73667
EC:1.13.11.75	All-trans-8'-apo-beta-carotenal 15,15'-oxygenase	24	1	0	0	0	1	2.66667	19.6667	3	9.16667
EC:1.13.11.79	5,6-dimethylbenzimidazole synthase	50.97	2.66667	6.66667	2.33333	11.6667	9	13.1667	23.6667	14.89	34.125
EC:1.13.11.8	Protocatechuate 4,5-dioxygenase	8.66667	0	1	1.66667	0	0	2.33333	5.33333	2.66667	3.83333
EC:1.13.11.80	(3,5-dihydroxyphenyl)acetyl-CoA 1,2-dioxygenase	4.66667	0	0	0	0	0	0	0	0	2.5
EC:1.13.11.9	2,5-dihydroxypyridine 5,6-dioxygenase	0	0	0	0	0	1.33333	0	0	0	2.83333
EC:1.13.12.16	Nitronate monooxygenase	244.053	10.5267	22.5	19.6233	21.8867	45.1667	55.0833	97.3333	82.1133	136.032
EC:1.13.12.3	Tryptophan 2-monooxygenase	11	0	2	0.666667	0.11	2.33333	6	12.6667	6.33333	5.5
EC:1.13.12.4	Lactate 2-monooxygenase	2.66667	0	0.666667	0	5	1	0	0	1.22333	1.83333
EC:1.13.99.1	Inositol oxygenase	0	0.666667	0	0	0	0	0	0	1.22333	0.445
EC:1.14.11.1	Gamma-butyrobetaine dioxygenase	13.3333	0	2	0.666667	0	2.33333	6.33333	12.6667	6.33333	5.5
EC:1.14.11.16	Peptide-aspartate beta-dioxygenase	0	0	0	0	0	0	0	0	0	0
EC:1.14.11.17	Taurine dioxygenase	88.9767	1.33333	13	5	6.42	25.7	36.3667	83.7333	41.9333	63.7333
EC:1.14.11.18	Phytanoyl-CoA dioxygenase	19.6667	1.33333	4.66667	3	0	4.33333	9.33333	24	15	16.5
EC:1.14.11.2	Procollagen-proline dioxygenase	11	2	3	4.33333	7.66667	12	1	0	1.33333	19.6667
EC:1.14.11.33	DNA oxidative demethylase	58.17	3.33333	9.66667	5.83333	5.97667	10.7	21.2	41.4	19.1567	31.4417
EC:1.14.11.39	L-asparagine oxygenase	0	0	0	0	0	0	0.666667	1	0	0
EC:1.14.11.47	50S ribosomal protein L16 3-hydroxylase	83.5333	2.66667	8.5	4.66667	2.86667	20.5333	25.2	47.7333	34.6	31.9833
EC:1.14.12.1	Anthranilate 1,2-dioxygenase (deaminating, decarboxylating)	16.6667	0	0	0	0	1.33333	0	0	12.6667	11.8333
EC:1.14.12.10	Benzoate 1,2-dioxygenase	49.3333	0	4	1.33333	0	6	19.3333	25.3333	16	11
EC:1.14.12.15	Terephthalate 1,2-dioxygenase	0	0	0	0	0	0	0	0	0	0
EC:1.14.12.17	Nitric oxide dioxygenase	86.7267	10.1933	11.6667	11.8433	7.64333	29.7	24.45	46.7333	32.2667	56.7783
EC:1.14.12.18	Biphenyl 2,3-dioxygenase	0	0	0	0	0	0	0	0	0	0
EC:1.14.12.19	3-phenylpropanoate dioxygenase	0	0	0	0	0	0.333333	0	0	0	0
EC:1.14.13.1	Salicylate 1-monooxygenase	21.5267	4	3	3	7	9.33333	5.66667	10.3333	2.89	25.9583
EC:1.14.13.10	2,6-dihydroxypyridine 3-monooxygenase	3.16667	0	0	0	2.33333	0.833333	0	0	0	1.91667
EC:1.14.13.100	25/26-hydroxycholesterol 7-alpha-hydroxylase	0	0	0	0	0	0	0	0	0	0.5
EC:1.14.13.106	Epi-isozizaene 5-monooxygenase	0	0	0	0	0.11	0	0	0	0	0
EC:1.14.13.107	Limonene 1,2-monooxygenase	5.33333	0	0	0	2	0	0.666667	1	0	2.66667
EC:1.14.13.111	Methanesulfonate monooxygenase	0	0	0	0	0	0	0	0	1	0
EC:1.14.13.113	FAD-dependent urate hydroxylase	0	0	0	0	0	0	0	5.33333	0	0
EC:1.14.13.114	6-hydroxynicotinate 3-monooxygenase	0	0	0	0	0	0	0	0	0	0
EC:1.14.13.127	3-(3-hydroxy-phenyl)propanoic acid hydroxylase	56.6667	2.66667	6.66667	4.66667	8.22	17.1667	14.3333	35.3333	24	51
EC:1.14.13.129	Beta-carotene 3-hydroxylase	3.77667	1	2.11	0	3.66667	4.11	1.16667	11.3333	12.39	6.445
EC:1.14.13.133	Pentalenene oxygenase	0	0	0	0	0.11	0	0.666667	0	0	0
EC:1.14.13.141	Cholest-4-en-3-one 26-monooxygenase	13	0	1	0	4.77667	2.66667	3.66667	12	0	10.1667
EC:1.14.13.142	3-ketosteroid 9-alpha-monooxygenase	28.6667	0	1.66667	0	7.66667	6	7.66667	25	0.666667	15.6667
EC:1.14.13.148	Trimethylamine monooxygenase	3	0	0	0	0	0	0	0	0	0.666667
EC:1.14.13.149	Phenylacetyl-CoA 1,2-epoxidase	93.7333	5.33333	17.3333	10.6667	18.62	29.4	33.7333	80.8	52.98	83.9667
EC:1.14.13.151	Linalool 8-monooxygenase	0	0	0	0	0	0	0	0	0	0
EC:1.14.13.165	Nitric-oxide synthase (NAD(P)H)	14.3333	2.33333	2	6.33333	2.33333	7	0	10	2.33333	21.8333
EC:1.14.13.172	Salicylate 5-hydroxylase	0	0	0	0	0	2.66667	0	0	0	5.66667
EC:1.14.13.2	4-hydroxybenzoate 3-monooxygenase	57.5267	3.33333	6	4	9.11	12	13.6667	28.3333	17.5567	33.9583
EC:1.14.13.20	2,4-dichlorophenol 6-monooxygenase	4.66667	0	0	0	0.11	0	0	0	0	1.66667
EC:1.14.13.22	Cyclohexanone monooxygenase	37.3333	0	1	0	5.66667	2.66667	1.5	1	0	10.5
EC:1.14.13.40	Anthraniloyl-CoA monooxygenase	51	6	17	10.89	8.44333	15.3333	31	77.6667	26.6667	50.5
EC:1.14.13.50	Pentachlorophenol monooxygenase	0	0	0	0	0	0	0	4.66667	0	0
EC:1.14.13.59	L-lysine N(6)-monooxygenase (NADPH)	9.33333	0	0	1.66667	0.22	0	1.33333	5.33333	0	6.33333
EC:1.14.13.7	Phenol 2-monooxygenase	3.66667	1.33333	0	0	0	3.33333	0	0	0	3
EC:1.14.13.70	Sterol 14-alpha-demethylase	2.66667	0	0	0	1	0	1	1	0	2.16667
EC:1.14.13.72	Methylsterol monooxygenase	0	0	0	0	0	0	0	0	0	0
EC:1.14.13.81	Magnesium-protoporphyrin IX monomethyl ester (oxidative) cyclase	24.3333	1.66667	0	0	0	1	2.66667	19.6667	4.33333	4.33333
EC:1.14.13.82	Vanillate monooxygenase	86.7767	0	10.3333	3.66667	3.66667	15	26	43.6667	37.6667	50.3333
EC:1.14.13.83	Precorrin-3B synthase	37.8033	2.66667	6.66667	2.33333	11.3333	9	10.3333	24.3333	15.89	27.625
EC:1.14.13.84	4-hydroxyacetophenone monooxygenase	12	0	0	0	1	0	1	0	0	4.16667
EC:1.14.13.9	Kynurenine 3-monooxygenase	34.4433	1.66667	6.27667	4.66667	1	5.77667	13.6667	30.3333	24.39	18.695
EC:1.14.13.92	Phenylacetone monooxygenase	0	0	0	0	0	0	0	0	0	0
EC:1.14.14.1	Unspecific monooxygenase	2.33333	0	0	0	0.33	1.33333	3.33333	5.33333	1.33333	3.77833
EC:1.14.14.12	3-hydroxy-9,10-secoandrosta-1,3,5(10)-triene-9,17-dione monooxygenase	15.3333	1.33333	2	1.33333	9.33333	7	2.33333	12	0.333333	18.6667
EC:1.14.14.5	Alkanesulfonate monooxygenase	107.617	2.66667	10.6667	8.33333	13.1767	29.9	34.7333	105.467	36.2	75.3
EC:1.14.14.8	Anthranilate 3-monooxygenase (FAD)	0	0	0	0	0	0	1	0	0	0
EC:1.14.14.9	4-hydroxyphenylacetate 3-monooxygenase	13.0333	1.66667	1	1.66667	3.86667	5.2	3.53333	9.4	4.6	17.15
EC:1.14.15.11	Pentalenic acid synthase	0	0	0	0	0.11	0	0.666667	0	0	0
EC:1.14.15.13	Pulcherriminic acid synthase	0	0	0	0	0.11	0	0.666667	5.33333	0	0
EC:1.14.15.3	Alkane 1-monooxygenase	51	1.33333	1.66667	0	5.33333	4.66667	6.83333	2	13.5	11.8333
EC:1.14.15.7	Choline monooxygenase	14.3333	0	0.333333	0	0	2.33333	1.33333	1	6.66667	7.88833
EC:1.14.15.9	Spheroidene monooxygenase	0	0.666667	0	0	0	0	0	0	1.33333	0
EC:1.14.16.1	Phenylalanine 4-monooxygenase	55.6933	2.52667	4.61	2.51	6	17.9433	14.0833	19	24.8333	22.295
EC:1.14.16.2	Tyrosine 3-monooxygenase	0	0	0	0.666667	0	0	0	0	0	0.333333
EC:1.14.18.1	Tyrosinase	0	0	0	0	0.22	0	0.666667	5.33333	0	0
EC:1.14.18.3	Methane monooxygenase (particulate)	0	0	0	0	0	0	0	0	0	0
EC:1.14.19.1	Stearoyl-CoA 9-desaturase	178.47	8.86	18.3867	12.29	6.77667	38.28	36.5833	136.333	50.56	82.1817
EC:1.14.19.2	Stearoyl-[acyl-carrier-protein] 9-desaturase	13.11	1	0.443333	0	4.77667	0.443333	2.66667	8.66667	10.1667	9.72333
EC:1.14.19.20	Delta(7)-sterol 5(6)-desaturase	0	0	0.5	0	0	0.333333	0	0	0	1.08333
EC:1.14.19.3	Acyl-CoA 6-desaturase	54.4767	1.66667	9.61	4.66667	13.31	9.97667	20.8667	44.7333	32.66	42.65
EC:1.14.19.8	Pentalenolactone synthase	0	0	0	0	0	0	0	0	0	0
EC:1.14.19.9	Tryptophan 7-halogenase	6	0	6.33333	1.66667	9.33333	13.3333	2.5	0	1.33333	10
EC:1.14.99.1	Prostaglandin-endoperoxide synthase	4.66667	0	0	0	0	0	0	0	0	1.66667
EC:1.14.99.29	Deoxyhypusine monooxygenase	0	0	0	0	0	0	0	0	0	0
EC:1.14.99.39	Ammonia monooxygenase	0	0	0	0	0	0	0	0	0	0
EC:1.14.99.44	Diapolycopene oxygenase	4.33333	1.33333	0	1.33333	2.33333	2.66667	0	0	0	6.83333
EC:1.14.99.46	Pyrimidine monooxygenase	3	0	0	0	1	2.83333	0.5	0.333333	0	2.83333
EC:1.14.99.48	Heme oxygenase (staphylobilin-producing)	12.3333	3.33333	0.333333	4	4.66667	9	0	0	9.33333	15.8333
EC:1.14.99.50	Gamma-glutamyl hercynylcysteine S-oxide synthase	48	0	1.33333	3.33333	4.77667	7	1.66667	22	2.66667	18.3333
EC:1.15.1.1	Superoxide dismutase	391.947	21.2467	41.6067	34.7	48.62	105.733	76.4833	231.967	162.597	228.2
EC:1.15.1.2	Superoxide reductase	2.75	0	1	0	0	1.33333	0	8.16667	1	7.33333
EC:1.16.1.1	Mercury(II) reductase	52	0	0	0.5	1.66667	0.166667	8.33333	10	6.66667	2.25
EC:1.16.1.3	Aquacobalamin reductase	1.11667	1.52667	0	1.17667	0.866667	10.7	2.78333	4.73333	2.26667	1.445
EC:1.16.1.9	Ferric-chelate reductase (NADPH)	0	0	0	0	0	0.166667	0	0.333333	0	0
EC:1.16.3.1	Ferroxidase	278.863	9.52667	27.4433	15.7333	18.6433	50.59	70.6167	164.4	93.2133	116.07
EC:1.16.3.2	Bacterial non-heme ferritin	22.95	2.19333	2.33333	1.84333	2.86667	14.0333	3.45	29.7333	40.7133	21.245
EC:1.16.8.1	Cob(II)yrinic acid a,c-diamide reductase	0.416667	0	0	0	0	0	1.33333	0	0	0.0416667
EC:1.17.1.1	CDP-4-dehydro-6-deoxyglucose reductase	70.3333	1.33333	8.33333	3.66667	4.33333	11.1667	22.1667	38.6667	30.6667	29.6667
EC:1.17.1.2	4-hydroxy-3-methylbut-2-enyl diphosphate reductase	227.447	11.86	27.2767	23.6767	33.31	65.9233	42.7833	133.9	96.3267	149.87
EC:1.17.1.4	Xanthine dehydrogenase	294.827	19.3333	59.5533	23.5567	42.44	58.22	98.6667	201.667	117.113	202.142
EC:1.17.1.8	4-hydroxy-tetrahydrodipicolinate reductase	241.89	14.86	32.3867	25.5667	41.6433	72.7	42.6167	144.567	103.66	168.732
EC:1.17.2.1	Nicotinate dehydrogenase (cytochrome)	5.53333	0	1.33333	0	0.866667	4.2	3.53333	4.4	2.26667	11.0667
EC:1.17.4.1	Ribonucleoside-diphosphate reductase	532.233	31.0533	51.7167	52.3567	60.4633	142.243	94.6333	280.1	200.577	306.672
EC:1.17.4.2	Ribonucleoside-triphosphate reductase	29.0333	2.86	7.66667	4.84333	0.866667	17.3667	16.1167	53.2333	38.6567	29.745
EC:1.17.5.1	Phenylacetyl-CoA dehydrogenase	0	0	0	0	0	0	0	0	0	0
EC:1.17.7.1	(E)-4-hydroxy-3-methylbut-2-enyl-diphosphate synthase (ferredoxin)	218.613	11.86	27.2767	23.6767	31.7533	65.9233	42.2833	129.233	91.9933	144.203
EC:1.17.7.3	(E)-4-hydroxy-3-methylbut-2-enyl-diphosphate synthase (flavodoxin)	218.613	11.86	27.2767	23.6767	31.7533	65.9233	42.2833	129.233	91.9933	144.203
EC:1.17.99.1	4-methylphenol dehydrogenase (hydroxylating)	3	0	0.333333	0	0	1.66667	1.33333	1	0.333333	1
EC:1.17.99.6	Epoxyqueuosine reductase	177.39	11.5267	19.72	15.7333	21.8667	47.7	39.95	89.9	78.9367	104.565
EC:1.18.1.1	Rubredoxin--NAD(+) reductase	46.7767	0	2.33333	0.666667	1	4	11	13.6667	12	6.5
EC:1.18.1.2	Ferredoxin--NADP(+) reductase	243.03	8.19333	22.2767	17.2333	29.42	56.7567	52.95	157.567	82.0467	131.987
EC:1.18.1.3	Ferredoxin--NAD(+) reductase	76.56	0.666667	4	1.66667	13.8667	17.2	10.3667	36.7333	14.1567	41.275
EC:1.18.1.7	specific)	0	0	0	0	0	0	1.33333	0	0	0.833333
EC:1.18.6.1	Nitrogenase	8	0	5	0	0	1	0	6.16667	2.44667	9.5
EC:1.2.1.10	Acetaldehyde dehydrogenase (acetylating)	72.95	5.86	7.33333	10.8433	14.31	28.8667	7.95	45.5667	20.9333	66.7783
EC:1.2.1.11	Aspartate-semialdehyde dehydrogenase	256.973	15.0533	30.0533	28.0767	32.7533	79.0333	46.5333	169.233	113.993	168.693
EC:1.2.1.12	Glyceraldehyde-3-phosphate dehydrogenase (phosphorylating)	378.553	22.2467	40.6067	36.0867	42.1967	98.0867	69.45	233.733	153.66	210.878
EC:1.2.1.16	Succinate-semialdehyde dehydrogenase (NAD(P)(+))	395.423	20.3867	36.4967	26.0767	54.5967	100.877	79.2667	184.867	109.917	226.347
EC:1.2.1.18	Malonate-semialdehyde dehydrogenase (acetylating)	283.393	16.0533	33.1667	21.91	20.6433	64.3667	76.8667	171.4	93.1567	152.198
EC:1.2.1.19	Aminobutyraldehyde dehydrogenase	35.95	0	4.33333	1.33333	0.2	6.7	14.5333	31.0667	15.2667	16.775
EC:1.2.1.2	Formate dehydrogenase	385.793	20.0533	39.4433	27.6867	46.4867	96.6567	73.7667	187.033	116.357	205.775
EC:1.2.1.20	Glutarate-semialdehyde dehydrogenase	358.223	20.3867	34.4967	25.41	54.3967	98.1767	67.7333	162.467	91.65	214.28
EC:1.2.1.21	Glycolaldehyde dehydrogenase	12.7767	0	3.66667	0.666667	0	2.5	5.33333	13	6.33333	7
EC:1.2.1.22	Lactaldehyde dehydrogenase	12.7767	0	3.66667	0.666667	0	2.5	5.33333	13	6.33333	7
EC:1.2.1.24	Succinate-semialdehyde dehydrogenase (NAD(+))	20	0	0.333333	0	0	1.83333	5	6.33333	3.66667	1.66667
EC:1.2.1.27	Methylmalonate-semialdehyde dehydrogenase (CoA acylating)	283.393	16.0533	33.1667	21.91	20.6433	64.3667	76.8667	171.4	93.1567	152.198
EC:1.2.1.28	Benzaldehyde dehydrogenase (NAD(+))	14.3333	0	1.66667	2.33333	2.77667	2.33333	4	22	6	11.1667
EC:1.2.1.3	Aldehyde dehydrogenase (NAD(+))	423.74	34	61.2733	51.67	83.2167	132.333	91.5	228	156.677	346.598
EC:1.2.1.32	Aminomuconate-semialdehyde dehydrogenase	9.33333	0	1	2.33333	0	2.33333	3.33333	1	10.7233	5
EC:1.2.1.38	N-acetyl-gamma-glutamyl-phosphate reductase	238.307	12.86	29.0533	24.79	31.31	66.0333	45.45	147.567	105.437	155.398
EC:1.2.1.39	Phenylacetaldehyde dehydrogenase	60.2	0	4.66667	2.33333	0.2	8.36667	20.2	48.7333	23.6	21.4
EC:1.2.1.4	Aldehyde dehydrogenase (NADP(+))	89.2767	3.86	11.11	5.51	5.77667	24.2233	31.4167	55	46.5033	46.225
EC:1.2.1.41	Glutamate-5-semialdehyde dehydrogenase	235.973	13.86	25.0533	22.5667	28.9767	64.2	43.95	156.567	87.27	136.232
EC:1.2.1.43	Formate dehydrogenase (NADP(+))	17.5	0	5.33333	3.33333	1.33333	3.5	0	21.5	9.33333	12.4167
EC:1.2.1.46	Formaldehyde dehydrogenase	37.86	1.33333	2	0.666667	0.11	5	10.3333	22.6667	14.3333	15.5417
EC:1.2.1.5	Aldehyde dehydrogenase (NAD(P)(+))	0	0	0	0	0	0	0	0	0	0
EC:1.2.1.54	Gamma-guanidinobutyraldehyde dehydrogenase	67.6667	1.33333	7.66667	3.66667	1	11	23	39.6667	21.3333	22.5
EC:1.2.1.59	Glyceraldehyde-3-phosphate dehydrogenase (NAD(P)(+)) (phosphorylating)	21.3333	1	0	0	0	1	2.66667	20.6667	3	4.83333
EC:1.2.1.60	5-carboxymethyl-2-hydroxymuconic-semialdehyde dehydrogenase	24.81	1.33333	1.66667	0.666667	1.53333	4.86667	8.53333	16.4	10.1567	15.9833
EC:1.2.1.68	Coniferyl-aldehyde dehydrogenase	87.8867	5.19333	12.2767	6.51	6.33333	27.61	29.4167	45.6667	25.2233	28.115
EC:1.2.1.70	Glutamyl-tRNA reductase	203.003	9.52667	20.72	19.5667	24.6433	58.7	37.7833	130.9	91.4933	132.057
EC:1.2.1.71	Succinylglutamate-semialdehyde dehydrogenase	69.7833	2.86	7.66667	4.84333	4.53333	19.0333	22.2833	41.4	28.9333	23.7783
EC:1.2.1.72	Erythrose-4-phosphate dehydrogenase	44.45	1.52667	2	1.84333	1.86667	13.0333	12.45	17.4	13.9333	7.27833
EC:1.2.1.75	Malonyl CoA reductase (malonate semialdehyde-forming)	0	0	0	0	0	0	0	0	0	0
EC:1.2.1.76	Succinate-semialdehyde dehydrogenase (acetylating)	0	0	0	0	0	0	0	0	0	0
EC:1.2.1.77	3,4-dehydroadipyl-CoA semialdehyde dehydrogenase (NADP(+))	0	0	0	0	0	1.33333	0	0	0	2.83333
EC:1.2.1.79	Succinate-semialdehyde dehydrogenase (NADP(+))	358.223	20.3867	34.4967	25.41	54.3967	98.1767	67.7333	162.467	91.65	214.28
EC:1.2.1.8	Betaine-aldehyde dehydrogenase	210.81	2.19333	11.3333	5.51	21.0833	26.8667	32.1167	88.7333	42.1567	93.4033
EC:1.2.1.80	Long-chain acyl-[acyl-carrier-protein] reductase	21.3333	1	0	0	0	1	2.66667	19.6667	3	4.33333
EC:1.2.1.81	Sulfoacetaldehyde dehydrogenase (acylating)	0	0	0	0	0	1.33333	0	0	1	2.83333
EC:1.2.1.85	2-hydroxymuconate-6-semialdehyde dehydrogenase	9.33333	0	1	2.33333	0	2.33333	3.33333	1	10.7233	5
EC:1.2.1.87	Propanal dehydrogenase (CoA-propanoylating)	9.33333	0	0.333333	0	0	2.66667	1.33333	3	2.33333	5.33333
EC:1.2.1.88	L-glutamate gamma-semialdehyde dehydrogenase	221.417	12.86	21.3867	17.7333	26.6433	49.2	41.6167	104.733	76.9367	132.682
EC:1.2.1.9	Glyceraldehyde-3-phosphate dehydrogenase (NADP(+))	29.2767	0.333333	4.11	3	2.33333	4.27667	9.33333	25.3333	14.5567	19.8617
EC:1.2.1.90	Glyceraldehyde-3-phosphate dehydrogenase (NAD(P)(+))	0	0	0	0	0	0	0	0	0	0.5
EC:1.2.1.91	3-oxo-5,6-dehydrosuberyl-CoA semialdehyde dehydrogenase	21.8667	2.66667	6.66667	3.22333	3.2	11.0333	16.2	34.4	14.9333	24.7333
EC:1.2.3.3	Pyruvate oxidase	7	1.33333	0	2	3	3.33333	0	1	0	7.5
EC:1.2.4.1	Pyruvate dehydrogenase (acetyl-transferring)	626.663	42.9133	66.6067	59.7	90.6367	161.867	96.6167	324.4	212.44	412.813
EC:1.2.4.2	Oxoglutarate dehydrogenase (succinyl-transferring)	177.64	11.86	22.0533	16.0667	26.9767	55.7	33.7833	85.0667	68.9367	114.765
EC:1.2.4.4	3-methyl-2-oxobutanoate dehydrogenase (2-methylpropanoyl-transferring)	184.217	9.66667	28.2767	23.67	30	48.11	24.3333	50.3333	60.1733	120.055
EC:1.2.5.1	Pyruvate dehydrogenase (quinone)	52.1167	5.33333	4.66667	6.05667	13.31	13.0333	8.53333	24.0667	12.6	44.8583
EC:1.2.7.1	Pyruvate synthase	60.6167	1.33333	3	6.33333	9.86667	28.3667	8.2	79.4	32.99	63.5333
EC:1.2.7.11	2-oxoacid oxidoreductase (ferredoxin)	218.22	5.33333	32.8867	32.6667	47.5533	69.1133	17	185.333	127.893	199.1
EC:1.2.7.3	2-oxoglutarate synthase	257.053	5.33333	37.5533	34.6667	53.5533	75.4467	18	242.667	155.56	224.7
EC:1.2.7.4	Carbon-monoxide dehydrogenase (ferredoxin)	1.33333	0	0	0	0	0	0	6.16667	0	1.33333
EC:1.2.7.5	Aldehyde ferredoxin oxidoreductase	39.5	0	6.66667	4.66667	1.33333	3.5	0	51.6667	20.5	19.5833
EC:1.2.7.7	3-methyl-2-oxobutanoate dehydrogenase (ferredoxin)	0	0	0	0	0	0	0	0	0	0.333333
EC:1.2.7.8	Indolepyruvate ferredoxin oxidoreductase	105.667	6	18.8333	8.66667	7	27.8333	35.1667	69.3333	55	92.8333
EC:1.2.98.1	Formaldehyde dismutase	5	0	0	0	0	2.66667	0	1	0	2
EC:1.2.99.2	Carbon-monoxide dehydrogenase (acceptor)	320.167	12	38.3333	25.2233	73.5533	67.1667	26.3333	187.667	85.6667	248.167
EC:1.2.99.5	Formylmethanofuran dehydrogenase	42.4967	1	2.33	0	3	12.67	5	6.16667	28.0033	27.0833
EC:1.2.99.7	Aldehyde dehydrogenase (FAD-independent)	0	0	0	0	0	0	0	0	0	0.333333
EC:1.20.1.1	Phosphonate dehydrogenase	0	0	0	0	0	0	0	0	0	0
EC:1.20.4.1	Arsenate reductase (glutaredoxin)	335.943	22.86	40.6067	35.18	44.6433	92.2533	70.2833	180.4	155.047	219.238
EC:1.20.4.3	Mycoredoxin	15.8333	1.33333	2.33333	2.16667	6.11	4.33333	1.66667	34	8.83333	17.5833
EC:1.21.4.1	D-proline reductase (dithiol)	1.66667	0	5	0	0	6	0	0	0	12.3333
EC:1.21.4.2	Glycine reductase	0	0	4	0	0	4	0	0	0	10.3333
EC:1.21.4.4	Betaine reductase	0	0	2	0	0	2	0	0	0	5
EC:1.21.98.1	Cyclic dehypoxanthinyl futalosine synthase	13.61	1	2.77667	3.66667	3.11	9.55667	3.33333	5.33333	9.22333	19.0833
EC:1.3.1.1	Dihydrouracil dehydrogenase (NAD(+))	38.97	4	8.66667	5.89	2.33333	12.3333	18	36.6667	16.89	35.375
EC:1.3.1.10	Enoyl-[acyl-carrier-protein] reductase (NADPH, Si-specific)	220.91	17.6667	32.9967	21.89	37.11	56.11	49	127	94.7267	152.44
EC:1.3.1.101	2,3-bis-O-geranylgeranyl-sn-glycerol 1-phosphate reductase (NAD(P)H)	0	0	0	0	0.666667	0	0	1	0	0
EC:1.3.1.104	Enoyl-[acyl-carrier-protein] reductase	0	0.666667	1.66667	3	0	3	0	0	0	7.33333
EC:1.3.1.106	Cobalt-precorrin-6A reductase	79.8033	6	7.66667	4.66667	13.7767	16	13.5	52.1667	30.4467	54.9583
EC:1.3.1.12	Prephenate dehydrogenase	169.723	11.1933	25.3867	23.2333	30.0867	60.3667	28.6167	118.9	87.4933	137.223
EC:1.3.1.13	Prephenate dehydrogenase (NADP(+))	0	0.666667	0	0	0	0	0	0	0	0
EC:1.3.1.14	Dihydroorotate dehydrogenase (NAD(+))	84.5267	3.33333	11.7767	14.3333	10.3333	33.5567	2.66667	69.8333	39.4467	75.05
EC:1.3.1.21	7-dehydrocholesterol reductase	0	0	0	0	0	0	0	0	0	0
EC:1.3.1.22	3-oxo-5-alpha-steroid 4-dehydrogenase (NADP(+))	0	0	0	0	0	0	0	0	2.16667	0.833333
EC:1.3.1.24	Biliverdin reductase	21.3333	1	0	0	0	1	2.66667	19.6667	3	4.33333
EC:1.3.1.25	1,6-dihydroxycyclohexa-2,4-diene-1-carboxylate dehydrogenase	24.6667	0	2	0.666667	0	3	9.66667	12.6667	8	5.5
EC:1.3.1.28	2,3-dihydro-2,3-dihydroxybenzoate dehydrogenase	22.31	1.33333	0	1.33333	2.53333	3.03333	7.2	14.4	6.15667	9.06667
EC:1.3.1.31	2-enoate reductase	3	0	0	0	0	1	0	2	1.33333	3
EC:1.3.1.32	Maleylacetate reductase	3	0	0.333333	0	0	1.66667	1.33333	1	0.333333	1
EC:1.3.1.33	Protochlorophyllide reductase	21.3333	1	0	0	0	1	2.66667	19.6667	3	4.33333
EC:1.3.1.34	2,4-dienoyl-CoA reductase (NADPH)	108.283	3.52667	8.83333	6.17667	8.97667	21.0333	28.1167	57.4	34.1	29.8617
EC:1.3.1.43	Arogenate dehydrogenase	27.6367	3.33333	4	1.66667	6.33333	5	3.83333	0	2.89	14.125
EC:1.3.1.44	Trans-2-enoyl-CoA reductase (NAD(+))	19.8667	3.05333	0.5	2.35333	0.866667	22.8667	6.7	9.4	10.7667	10.9067
EC:1.3.1.45	2'-hydroxyisoflavone reductase	5	0	0.5	0	0	1	0	0	0	1.41667
EC:1.3.1.49	Cis-3,4-dihydrophenanthrene-3,4-diol dehydrogenase	0	0	0	0	0	0	0.5	0	0	0
EC:1.3.1.53	(3S,4R)-3,4-dihydroxycyclohexa-1,5-diene-1,4-dicarboxylate dehydrogenase	0	0	0	0	0	0	0	0	0	0
EC:1.3.1.54	Precorrin-6A reductase	79.8033	6	7.66667	4.66667	13.7767	16	13.5	52.1667	30.4467	54.9583
EC:1.3.1.70	Delta(14)-sterol reductase	0	0	0	0	0	0	0	0	0	0.5
EC:1.3.1.72	Delta(24)-sterol reductase	0	0	0	0	0	0	0	0	0	0.5
EC:1.3.1.74	2-alkenal reductase (NAD(P)(+))	23.5	2	8.33333	5	4.33333	6	0	26.6667	11.6667	15.4167
EC:1.3.1.75	Divinyl chlorophyllide a 8-vinyl-reductase	0	0	0	0	0	0	0	0	0	0
EC:1.3.1.76	Precorrin-2 dehydrogenase	133.173	12.5267	16.0533	15.4	26.8433	54.5667	25.4833	65.3	61.9267	99.4983
EC:1.3.1.78	Arogenate dehydrogenase (NADP(+))	21.3333	1	0	0	0	1	2.66667	20.6667	3	4.33333
EC:1.3.1.83	Geranylgeranyl diphosphate reductase	25.3333	1.66667	0	0	0	1	2.66667	25.3333	5.5	4.33333
EC:1.3.1.84	Acrylyl-CoA reductase (NADPH)	0	0	0	0	0	0	0	0	0	0
EC:1.3.1.85	Crotonyl-CoA carboxylase/reductase	18.6667	0.666667	0	1.33333	1.66667	1.66667	1	0	1.33333	8.41667
EC:1.3.1.86	Crotonyl-CoA reductase	9.66667	0	1.66667	1.66667	5.11	2.66667	1.33333	15.3333	2.66667	13.5
EC:1.3.1.87	3-(cis-5,6-dihydroxycyclohexa-1,3-dien-1-yl)propanoate dehydrogenase	0	0	0	0	0	0.166667	0	0	0	0
EC:1.3.1.9	Enoyl-[acyl-carrier-protein] reductase (NADH)	296.163	24.72	42.94	35.5767	50.6433	103.253	59.8667	159.567	125.273	216.875
EC:1.3.1.93	Very-long-chain enoyl-CoA reductase	0	0	0	0	0	0	0	0	0	0
EC:1.3.1.98	UDP-N-acetylmuramate dehydrogenase	236.057	12.86	26.3867	23.5667	31.9767	65.3667	41.6167	150.567	96.2167	154.648
EC:1.3.3.11	Pyrroloquinoline-quinone synthase	73.4433	0.666667	4	1.55667	3	8.33333	15	30	24.3333	25.8333
EC:1.3.3.14	Aclacinomycin-A oxidase	0	0	0	0	0	0	0	0	0	0
EC:1.3.3.3	Coproporphyrinogen oxidase	145.197	8.86	14.2767	6.51	13.2	29.4767	32.6167	68.4	55.5467	62.6533
EC:1.3.3.4	Protoporphyrinogen oxidase	51.2767	5.66667	6.44333	10.0567	14.4433	23.7233	4.33333	36.6667	24.39	64.2167
EC:1.3.3.5	Bilirubin oxidase	0	0	0	0	0	0	0	0	0	0
EC:1.3.3.6	Acyl-CoA oxidase	17.5	1.33333	1.66667	2.16667	6.11	5	1	12.3333	2.66667	19.75
EC:1.3.4.1	Fumarate reductase (CoM/CoB)	0	0	0	0	0	0	0	0	0	0
EC:1.3.5.1	Succinate dehydrogenase (quinone)	498.56	25.72	54.7733	49.1333	67.7267	131.4	87.9	324.467	216.207	320.963
EC:1.3.5.2	Dihydroorotate dehydrogenase (quinone)	162.53	9.52667	15.9433	10.2333	21.31	36.1433	34.2833	87.0667	68.7133	84.9317
EC:1.3.5.3	Protoporphyrinogen IX dehydrogenase (menaquinone)	14.95	1.52667	0.666667	2.51	1.53333	11.0333	2.78333	20.0667	9.93333	5.52833
EC:1.3.5.4	Fumarate reductase (quinol)	516.127	32.1067	59.44	56.1533	79.1267	159.8	93.4667	334.267	229.073	354.103
EC:1.3.5.5	15-cis-phytoene desaturase	21.3333	1	0	0	0	1	2.66667	19.6667	3	4.33333
EC:1.3.5.6	9,9'-di-cis-zeta-carotene desaturase	0	0	0	0	0	0	2.66667	19.6667	5.33333	0.445
EC:1.3.7.11	2,3-bis-O-geranylgeranyl-sn-glycero-phospholipid reductase	0	0	0	0	0.666667	0	0	1	0	0
EC:1.3.7.5	Phycocyanobilin:ferredoxin oxidoreductase	21.3333	1	0	0	0	1	2.66667	19.6667	3	4.33333
EC:1.3.7.7	Ferredoxin:protochlorophyllide reductase (ATP-dependent)	35.6667	3	0	0	0	3	8	70.3333	15.3333	6.33333
EC:1.3.7.9	4-hydroxybenzoyl-CoA reductase	0	0	0	0	0	0	0	0	0	0.5
EC:1.3.8.1	Short-chain acyl-CoA dehydrogenase	104	4.66667	23.3333	9.44667	16.6667	24.3333	32.3333	72.6667	41.7233	77.6667
EC:1.3.8.12	(2S)-methylsuccinyl-CoA dehydrogenase	12.6667	0.666667	0	0.666667	1.66667	1.66667	1	10	1.33333	6.25
EC:1.3.8.2	4,4'-diapophytoene desaturase (4,4'-diapolycopene-forming)	1.33333	0	0	0	0	0	0	0	0	0
EC:1.3.8.4	Isovaleryl-CoA dehydrogenase	103.36	6.38667	11.1667	6.91	9.33333	25.1667	27	41.6667	33.2233	43.1317
EC:1.3.8.6	Glutaryl-CoA dehydrogenase (ETF)	154.58	11.3333	15.3867	8.89	19.11	30.72	30.1667	69.3333	54.3367	90.0983
EC:1.3.8.7	Medium-chain acyl-CoA dehydrogenase	445.693	15.6667	39.6667	35.2267	79.8867	102.333	66.1667	204	83.2233	279.042
EC:1.3.8.8	Long-chain-acyl-CoA dehydrogenase	7.33333	0	1.66667	0	6	2.66667	2.5	1	0	9.16667
EC:1.3.98.1	Dihydroorotate oxidase (fumarate)	23.5	0	2	0.666667	1.33333	4	2.66667	24.6667	19.8333	16.8333
EC:1.3.99.12	2-methylacyl-CoA dehydrogenase	0	0	0.666667	0	0.11	0	0	0	2.33333	0.833333
EC:1.3.99.16	Isoquinoline 1-oxidoreductase	309.33	7.33333	42.5533	15.78	27.3333	56.5533	78.5	174.333	128.34	141.613
EC:1.3.99.22	Coproporphyrinogen dehydrogenase	409.98	29.2467	55.44	45.5867	51.0433	123.767	101.683	282.867	193.92	265.963
EC:1.3.99.23	All-trans-retinol 13,14-reductase	2.66667	0	0	0	0	0	0	0	1.22333	4
EC:1.3.99.26	All-trans-zeta-carotene desaturase	52.0533	6.66667	6.22	7.33333	14.7767	14.1667	2.83333	38.6667	29.9467	48.195
EC:1.3.99.27	1-hydroxycarotenoid 3,4-desaturase	3	0.666667	0	0	0	0	0	0	1.33333	0.5
EC:1.3.99.28	Phytoene desaturase (neurosporene-forming)	52.0533	6.66667	6.22	7.33333	14.7767	14.1667	2.83333	38.6667	29.9467	48.195
EC:1.3.99.29	Phytoene desaturase (zeta-carotene-forming)	52.0533	6.66667	6.22	7.33333	14.7767	14.1667	2.83333	38.6667	29.9467	48.195
EC:1.3.99.31	Phytoene desaturase (lycopene-forming)	52.0533	6.66667	6.22	7.33333	14.7767	14.1667	2.83333	38.6667	29.9467	48.195
EC:1.3.99.32	Glutaryl-CoA dehydrogenase (acceptor)	0	0	1.33333	0	0.666667	1.33333	1	0	0	2.16667
EC:1.3.99.33	Urocanate reductase	0	0	0	0	0	0	0	0	0	0
EC:1.3.99.35	Chlorophyllide a reductase	10	2	0	0	0	0	0	5.66667	5.16667	0
EC:1.3.99.4	3-oxosteroid 1-dehydrogenase	7.83333	0	0.333333	0	1.66667	1.66667	2.33333	19.3333	0.333333	3
EC:1.3.99.5	3-oxo-5-alpha-steroid 4-dehydrogenase (acceptor)	10.5	0	0.333333	0	2	1.66667	1.33333	5.66667	0.333333	3.5
EC:1.3.99.8	2-furoyl-CoA dehydrogenase	15.6667	0	1	0	0	5	4	3	1	4.66667
EC:1.4.1.1	Alanine dehydrogenase	170.553	12.1933	15.3867	16.7333	30.7767	66.3333	16.75	103.5	70.0033	118.17
EC:1.4.1.11	L-erythro-3,5-diaminohexanoate dehydrogenase	9.66667	0	1	1.89	1.66667	2.66667	0	5.33333	0	10.3333
EC:1.4.1.13	Glutamate synthase (NADPH)	449.057	31.44	53.9967	47.71	61.0633	151.123	100.233	282.967	191.097	296.055
EC:1.4.1.14	Glutamate synthase (NADH)	449.057	31.44	53.9967	47.71	61.0633	151.123	100.233	282.967	191.097	296.055
EC:1.4.1.16	Diaminopimelate dehydrogenase	3.58333	1.66667	0	1.66667	2.33333	4	0	0	5.72333	10.4667
EC:1.4.1.18	Lysine 6-dehydrogenase	4.66667	1.66667	0	2.33333	2.33333	4	0	0	2.33333	7.5
EC:1.4.1.2	Glutamate dehydrogenase	154.61	9.86	17.1667	13.51	21.4433	39.5	27.9167	67.3333	36.2233	82.42
EC:1.4.1.20	Phenylalanine dehydrogenase	0	0	0.666667	0	0	0	0	0	0	2.33333
EC:1.4.1.21	Aspartate dehydrogenase	9.95	1.33333	0.333333	1.33333	2.53333	5.86667	7.53333	6.73333	2.6	13.775
EC:1.4.1.23	Valine dehydrogenase (NAD(+))	9.66667	0	1	1.66667	1.77667	2.66667	0.666667	5.33333	0	11.5
EC:1.4.1.24	3-dehydroquinate synthase II	0	0	0	0	0	0	0	1	0	0
EC:1.4.1.3	Glutamate dehydrogenase (NAD(P)(+))	93.22	4.33333	13.22	8.55667	7.77667	22.1667	12.6667	70.6667	43.4467	60.6117
EC:1.4.1.4	Glutamate dehydrogenase (NADP(+))	85.42	10.3333	9.77667	12.5	8.86667	34.4767	25.2	60.7333	49.6567	66.715
EC:1.4.1.9	Leucine dehydrogenase	105.943	3.33333	5.94333	6.89	8.66667	15.11	16.8333	23	31.8333	47.5283
EC:1.4.3.10	Putrescine oxidase	0	1.33333	0	0	0	1.66667	0	5.33333	0	2.33333
EC:1.4.3.16	L-aspartate oxidase	191.947	7.86	24.7767	20.4	23.9767	58.4233	34.95	126.567	82.0467	132.453
EC:1.4.3.19	Glycine oxidase	89.58	5	11.11	10.7233	12.7767	27.7233	16.3333	37.6667	34.4467	62.375
EC:1.4.3.20	L-lysine 6-oxidase	0	0	0	0	0	0	0	0	0	0
EC:1.4.3.21	Primary-amine oxidase	23	1.33333	0.333333	0	2.11	3.5	3	7.66667	0.333333	11
EC:1.4.3.3	D-amino-acid oxidase	14.3333	0	1	1.66667	1.77667	3.66667	0.666667	10	0	10.5
EC:1.4.3.4	Monoamine oxidase	66.6667	3.33333	11.3333	10.3333	10.7767	14.3333	20.1667	74	19.7233	47.5
EC:1.4.3.5	Pyridoxal 5'-phosphate synthase	185.64	9.19333	19.3867	9.73333	22.0867	38.3667	39.95	108.067	66.6033	93.1817
EC:1.4.4.2	Glycine dehydrogenase (aminomethyl-transferring)	332.917	18.86	43.4967	39.5667	47.9767	106.423	56.6167	212.067	134.66	224.098
EC:1.4.7.1	Glutamate synthase (ferredoxin)	60.0533	2.33333	5.55333	3.33333	5.66667	17.8333	2.66667	48.6667	15.2233	31.695
EC:1.4.9.1	Methylamine dehydrogenase (amicyanin)	8	0	0.666667	0	0	4	2.66667	2	0.666667	4.66667
EC:1.4.99.5	Glycine dehydrogenase (cyanide-forming)	24	0	5	2	0	2	12	35	18	13.5
EC:1.4.99.6	D-arginine dehydrogenase	33.3333	0.666667	3	0.666667	3.66667	6	11.5	12.6667	8	15.8333
EC:1.5.1.1	(NAD(P)H)	8.77667	0	0	0	0	0	0	0	6.33333	4.5
EC:1.5.1.10	Saccharopine dehydrogenase (NADP(+), L-glutamate-forming)	4.33333	0	0.666667	0	0	1.33333	1	0	4.89	0
EC:1.5.1.2	Pyrroline-5-carboxylate reductase	258.917	15.1933	32.1633	29.5667	35.9767	73.81	46.6167	162.9	111.66	175.26
EC:1.5.1.20	Methylenetetrahydrofolate reductase (NAD(P)H)	229.193	11.1933	18.0533	15.01	27.0867	57.7	45.2833	139.9	90.4367	125.482
EC:1.5.1.21	1-piperideine-2-carboxylate/1-pyrroline-2-carboxylate reductase (NADPH)	14	0	2	0.666667	0	2.33333	5.33333	12.6667	7.33333	5.5
EC:1.5.1.24	N(5)-(carboxyethyl)ornithine synthase	0	0	0	0	0	0	0	0	0	0
EC:1.5.1.25	Thiomorpholine-carboxylate dehydrogenase	4.66667	0	0	0	0	0	0	0	0	1.66667
EC:1.5.1.28	Opine dehydrogenase	14.6667	1.33333	1	1.66667	0	14.6667	2.66667	16.3333	5.33333	9.66667
EC:1.5.1.3	Dihydrofolate reductase	169.037	10.86	21.61	13.9	24.4	49.01	44.8167	90.1333	90.2033	106.493
EC:1.5.1.33	Pteridine reductase	58.61	1	3.94333	0.89	2.66667	7.05667	6.33333	26	15.0567	15.3333
EC:1.5.1.34	6,7-dihydropteridine reductase	0.5	1.72	0	1.35333	0	10.5	0.5	0.333333	0	0.09
EC:1.5.1.36	Flavin reductase (NADH)	5.2	0	0.333333	0	0.2	2.03333	3.86667	5.73333	2.6	2.4
EC:1.5.1.38	FMN reductase (NADPH)	144.783	9	20.3333	17	20.1967	35.0333	45.7	117.067	56.6	112.775
EC:1.5.1.39	FMN reductase (NAD(P)H)	0.916667	0	0	0	0	0	0	0	1.83333	2.46667
EC:1.5.1.41	Riboflavin reductase (NAD(P)H)	1.11667	1.52667	0	1.17667	0.866667	10.7	2.78333	4.73333	2.26667	1.445
EC:1.5.1.43	Carboxynorspermidine synthase	0.25	1.52667	0	1.17667	0	10.3333	0.25	0	0	0.045
EC:1.5.1.45	FAD reductase (NAD(P)H)	3	1.33333	0	1.33333	2.33333	2.66667	0	0	0	6.83333
EC:1.5.1.47	Dihydromethanopterin reductase (NAD(P)(+))	3	0	0	0	0	0	0	0	0	1.33333
EC:1.5.1.49	1-pyrroline-2-carboxylate reductase (NAD(P)H)	0.25	0.193333	0	0.176667	0	0	0.25	0	0	0.045
EC:1.5.1.5	Methylenetetrahydrofolate dehydrogenase (NADP(+))	247.443	14.1933	29.0533	27.2333	32.7533	80.7	46.45	154.233	106.327	160.148
EC:1.5.1.7	Saccharopine dehydrogenase (NAD(+), L-lysine-forming)	10.25	2	0	1.33333	2.33333	3.66667	1	1	6.16667	10.8
EC:1.5.1.9	Saccharopine dehydrogenase (NAD(+), L-glutamate-forming)	6.44333	0.333333	0.443333	1.66667	1	0.443333	0	0	0	4.61167
EC:1.5.3.1	Sarcosine oxidase	353.91	20.3333	35.4433	14.78	32.7733	62.0567	91	170	121.007	184.208
EC:1.5.3.19	4-methylaminobutanoate oxidase (formaldehyde-forming)	11.6667	0	0	0	0	0	2	0	2.33333	3.33333
EC:1.5.3.7	L-pipecolate oxidase	0	0	0	0	0	0	0	0	0	2.16667
EC:1.5.5.1	Electron-transferring-flavoprotein dehydrogenase	123.58	7.05333	12.5	7.68667	10.6667	26.1667	27	54	35.2233	46.465
EC:1.5.5.2	Proline dehydrogenase	167.473	9.52667	13.2767	7.84333	14.5333	34.4233	33.6167	75.7333	43.7133	68.57
EC:1.5.8.1	Dimethylamine dehydrogenase	0.0833333	0	0	0	0	0	0	0	0	0.0416667
EC:1.5.8.2	Trimethylamine dehydrogenase	0.0833333	0	0	0	0	0	0	0	0	0.0416667
EC:1.5.8.4	Dimethylglycine dehydrogenase	12.3333	0.666667	0	0	0	0	6.66667	0	8.66667	0
EC:1.5.98.1	Methylenetetrahydromethanopterin dehydrogenase	0	0	0	0	0	0	0	0	0	0
EC:1.5.98.2	5,10-methylenetetrahydromethanopterin reductase	25	0	0.666667	2.33333	0	0	0	15.3333	5	14.5
EC:1.5.99.14	6-hydroxypseudooxynicotine dehydrogenase	4.66667	0	0	0	0	0	0	0	0	1.66667
EC:1.5.99.6	Spermidine dehydrogenase	0	0	0	0	0	0	0	0	0	0
EC:1.6.1.1	NAD(P)(+) transhydrogenase (Si-specific)	64.3933	1.86	3.44333	3.73333	3.97667	17.2567	16.1167	18.4	18.49	20.4167
EC:1.6.1.2	NAD(P)(+) transhydrogenase (Re/Si-specific)	479.643	20.3867	52.1667	26.6867	62.0667	107.9	97.7333	247.133	127.537	237.432
EC:1.6.2.4	NADPH--hemoprotein reductase	0	0	0	0	0.11	1.33333	0	5.33333	0	3.77833
EC:1.6.3.3	NADH oxidase (H(2)O(2)-forming)	4.66667	0	0	0	0	0	0	1	0	1.66667
EC:1.6.5.2	NAD(P)H dehydrogenase (quinone)	299.953	18.1933	34.9433	27.29	24.9533	69.3433	82.4833	165.8	109.037	157.72
EC:1.6.5.3	NADH:ubiquinone reductase (H(+)-translocating)	2270.7	73.3333	257.1	173.9	286.433	452.9	407.667	1508.33	896.7	1311.25
EC:1.6.5.5	NADPH:quinone reductase	338.057	18.86	38.0533	27.07	48.9733	77.5333	69.45	199.733	106.103	231.195
EC:1.6.99.1	NADPH dehydrogenase	0.666667	1	2	3.33333	0	4.33333	0	0	3.33333	9.33333
EC:1.6.99.3	NADH dehydrogenase	440.053	21.86	43.0533	41.79	54.64	100.2	69.95	244.733	155.327	264.357
EC:1.7.1.13	PreQ(1) synthase	164.447	8.52667	17.9433	14.1767	16.8667	40.2567	38.2833	85.0667	70.1033	88.62
EC:1.7.1.15	Nitrite reductase (NADH)	279.063	13.7733	41.6633	23.3733	31.2867	87.9033	85.0667	188.8	116.817	164.118
EC:1.7.1.7	GMP reductase	5.45	3.19333	1	2.84333	3.53333	16.0333	2.78333	5.73333	5.93333	14.945
EC:1.7.2.1	Nitrite reductase (NO-forming)	36.86	1.33333	7.5	3.66667	3	8.33333	15.3333	44.6667	20.4467	23.2083
EC:1.7.2.2	Nitrite reductase (cytochrome; ammonia-forming)	3.5	0.193333	0.666667	0.176667	0.666667	0.166667	0.25	0	2.66667	1.37833
EC:1.7.2.3	Trimethylamine-N-oxide reductase (cytochrome c)	1.16667	4.38667	0	3.35333	0	31.3333	0.5	0	0	0.09
EC:1.7.2.4	Nitrous-oxide reductase	38.11	0	1.66667	0.666667	3	2	5	11.6667	7.78	11.1667
EC:1.7.2.5	Nitric-oxide reductase (cytochrome c)	28.5267	1.33333	6.83333	4.33333	0	7	15.3333	37.6667	19.89	19.57
EC:1.7.3.3	Factor independent urate hydroxylase	9.33333	1.33333	0	0	0.11	2.66667	1.66667	10	2.66667	6.16667
EC:1.7.7.1	Ferredoxin--nitrite reductase	35.3333	1	0	0.666667	1	2	2.66667	19.6667	3	8.695
EC:1.7.7.2	Ferredoxin--nitrate reductase	30.6667	1	0.666667	0	1.33333	1.66667	2.66667	19.6667	4.22333	8
EC:1.7.99.1	Hydroxylamine reductase	42.8667	2.52667	2.66667	2.51	0.2	14.3667	6.78333	27.9	18.7667	22.0783
EC:1.7.99.4	Nitrate reductase	325.29	16.72	41.61	24.3533	39.5967	84.8233	99.7667	207.533	101.36	183.665
EC:1.8.1.14	CoA-disulfide reductase	1.33333	0	0	0	0	0	0	0	0	0
EC:1.8.1.15	Mycothione reductase	10.5	1.33333	0	0.5	1	5.33333	1	8.33333	2	9.25
EC:1.8.1.2	Assimilatory sulfite reductase (NADPH)	245.98	13.0533	28.8333	19.5767	19.0667	63.2333	75.4	148.8	93.1467	113.46
EC:1.8.1.4	Dihydrolipoyl dehydrogenase	452.64	31.86	59.55	50.7333	67.6167	138.343	88.9833	286.967	201.32	321.222
EC:1.8.1.7	Glutathione-disulfide reductase	113.64	7.19333	8.72	3.51	12.2	23.5867	23.6167	43.0667	23.1567	33.5433
EC:1.8.1.8	Protein-disulfide reductase	192.507	10.0533	23.33	13.8	14.4	64.51	53.9	100.467	84.6467	94.955
EC:1.8.1.9	Thioredoxin-disulfide reductase	409.19	32.1933	66.55	55.9	84.0867	125.863	81.95	270.4	208.163	336.442
EC:1.8.2.1	Sulfite dehydrogenase	11.3333	1.33333	4.66667	3	0	3.66667	9.33333	24	8.66667	10.6667
EC:1.8.2.2	Thiosulfate dehydrogenase	33.8033	1.86	5.11	3.17667	2.33333	4.77667	14.25	29	14.89	13.6567
EC:1.8.2.3	Sulfide-cytochrome-c reductase (flavocytochrome c)	0	0	0	0	0	0	0	0	0	0
EC:1.8.3.1	Sulfite oxidase	7.66667	0	0	0	0.666667	0.666667	1	0	0	1.66667
EC:1.8.4.11	Peptide-methionine (S)-S-oxide reductase	302.5	23.9133	34.83	33.92	44.31	97.1433	63.95	183.567	126.993	197.545
EC:1.8.4.12	Peptide-methionine (R)-S-oxide reductase	270.417	14.72	25.83	21.41	34.31	67.9767	50.7	133.9	115.383	153.833
EC:1.8.4.8	Phosphoadenylyl-sulfate reductase (thioredoxin)	164.64	9.19333	16.3867	13.2333	18.6433	46.8667	36.45	105.733	67.9367	105.898
EC:1.8.5.2	Thiosulfate dehydrogenase (quinone)	24.6667	0	1	4.22333	3.22	2.83333	0.666667	17.6667	12.0567	18.0833
EC:1.8.5.3	Dimethylsulfoxide reductase	2.58333	1.52667	0	1.17667	0	11.5	0.25	2	1.33333	3.045
EC:1.8.7.1	Assimilatory sulfite reductase (ferredoxin)	38.8867	3.66667	3.55333	2.16667	8.11	10.6667	6.66667	43.3333	20.6133	28.7783
EC:1.8.7.2	Ferredoxin:thioredoxin reductase	21.3333	1	0	0	0	1	2.66667	19.6667	3	4.33333
EC:1.8.98.1	CoB--CoM heterodisulfide reductase	0	0	0	0	0	0	0	25.5	0	5.33333
EC:1.8.99.2	Adenylyl-sulfate reductase	7.33333	0	0	0	0	0	0	0	0	2
EC:1.8.99.3	Hydrogensulfite reductase	0	0	0	0	0	0	0	0	0	0.666667
EC:1.8.99.5	Dissimilatory sulfite reductase	0	0	0	0	0	0	0	0	0	0.666667
EC:1.9.3.1	Cytochrome-c oxidase	979.037	72.44	134.653	100.66	153.55	295.613	191.833	543	411.74	624.378
EC:1.97.1.4	[Formate-C-acetyltransferase]-activating enzyme	153.9	9.91333	18	19.7533	10.7333	63.7333	22.8167	133.3	82.48	130.59
EC:1.97.1.9	Selenate reductase	0.666667	0	0	0	0	0.5	0	0.333333	0	0
EC:2.1.1.10	Homocysteine S-methyltransferase	33.7	2.33333	6.33333	6.89	7.64333	9.7	4.2	24.7333	17.8233	42.4
EC:2.1.1.103	Phosphoethanolamine N-methyltransferase	0	0	0	0	0	0	0	0	0	0.111667
EC:2.1.1.104	Caffeoyl-CoA O-methyltransferase	16.6667	0	0	3.33333	0.11	0	0.666667	5.33333	0	13.6667
EC:2.1.1.107	Uroporphyrinogen-III C-methyltransferase	409.15	27.7733	51.22	40.2633	51.4867	131.1	99.4333	271.367	169.973	259.963
EC:2.1.1.11	Magnesium protoporphyrin IX methyltransferase	24.3333	1.66667	0	0	0	1	2.66667	19.6667	4.33333	4.33333
EC:2.1.1.113	Site-specific DNA-methyltransferase (cytosine-N(4)-specific)	0	0	1.66667	0	0	0	0	0	0	1.5
EC:2.1.1.13	Methionine synthase	268.25	13.1933	31.9967	25.7333	36.31	67.9767	50.2833	168.567	137.16	169.677
EC:2.1.1.130	Precorrin-2 C(20)-methyltransferase	63.6367	5	6.66667	4.66667	16.4433	15	13.5	53.1667	30.4467	52.9583
EC:2.1.1.131	Precorrin-3B C(17)-methyltransferase	89.9133	7.33333	7.66667	6	16.11	18.6667	15.1667	56.8333	30.17	63.625
EC:2.1.1.132	Precorrin-6B C(5,15)-methyltransferase (decarboxylating)	82.1367	6	6.66667	4.66667	14.8867	16	14.1667	51.6667	25.7233	53.9033
EC:2.1.1.133	Precorrin-4 C(11)-methyltransferase	85.97	6	7.66667	4.66667	16.4433	17	13.5	58.8333	32.9467	59.2917
EC:2.1.1.14	5-methyltetrahydropteroyltriglutamate--homocysteine S-methyltransferase	187.927	12.0533	22.8333	19.1867	11.8433	53.9	49.2333	119.133	59.09	105.905
EC:2.1.1.144	Trans-aconitate 2-methyltransferase	40.1933	1.33333	5.33333	2.55667	6.11	9.16667	8	24.6667	9.55667	33.375
EC:2.1.1.148	Thymidylate synthase (FAD)	55.2767	2.33333	4.66667	4.83333	3.44333	7.66667	4.33333	36.8333	11.3333	30.605
EC:2.1.1.151	Cobalt-factor II C(20)-methyltransferase	55.47	5	5	4.66667	10.4433	12.3333	11.8333	41.5	27.78	42.2917
EC:2.1.1.152	Precorrin-6A synthase (deacetylating)	33.5	0.666667	3.66667	0.666667	6.77667	7.33333	7.83333	21	9.66667	22.4167
EC:2.1.1.163	Demethylmenaquinone methyltransferase	300.557	13.86	28.0533	23.5667	34.6433	65.7	43.7833	193.233	114.77	163.232
EC:2.1.1.166	23S rRNA (uridine(2552)-2'-O)-methyltransferase	120.92	6.86	13.1667	6.73333	10.8667	26.5333	29.2833	48.4	37.49	53.9867
EC:2.1.1.17	Phosphatidylethanolamine N-methyltransferase	16.97	5.33333	7.33333	3.33333	9.33333	6.66667	4.33333	0	0.556667	19.0417
EC:2.1.1.170	16S rRNA (guanine(527)-N(7))-methyltransferase	233.447	12.5267	27.61	24.5667	30.9767	61.81	41.6167	150.567	92.77	152.51
EC:2.1.1.171	16S rRNA (guanine(966)-N(2))-methyltransferase	110.42	6.86	9.5	4.01	16.9767	30.0333	21.1167	47.7333	29.49	56.0983
EC:2.1.1.172	16S rRNA (guanine(1207)-N(2))-methyltransferase	126.87	9.38667	9.5	11.1867	9.17667	41.0667	32.9	42.4667	38.98	43.82
EC:2.1.1.173	23S rRNA (guanine(2445)-N(2))-methyltransferase	65.45	1.52667	3.83333	1.84333	1.86667	15.0333	16.1167	22.4	17.2667	12.8617
EC:2.1.1.174	23S rRNA (guanine(1835)-N(2))-methyltransferase	0	0	0	0	0.666667	0.166667	0	0.333333	0	0
EC:2.1.1.176	16S rRNA (cytosine(967)-C(5))-methyltransferase	253.167	17.1933	30.9433	22.5667	37.9767	67.4767	51.95	139.9	103.993	171.252
EC:2.1.1.177	23S rRNA (pseudouridine(1915)-N(3))-methyltransferase	157.28	10.1933	18.61	15.0667	22.2	45.31	34.6167	69.5667	73.38	97.065
EC:2.1.1.178	16S rRNA (cytosine(1407)-C(5))-methyltransferase	3.11667	1.52667	0.666667	1.17667	0.866667	10.7	2.78333	20.0667	7.26667	2.27833
EC:2.1.1.179	16S rRNA (guanine(1405)-N(7))-methyltransferase	4	0	1.33333	0	0	0	0	21.3333	0	1.66667
EC:2.1.1.181	23S rRNA (adenine(1618)-N(6))-methyltransferase	44.45	2.19333	2	1.84333	1.86667	13.7	13.1167	17.4	20.1	8.77833
EC:2.1.1.182	16S rRNA (adenine(1518)-N(6)/adenine(1519)-N(6))-dimethyltransferase	236.723	12.86	28.3867	24.5667	32.6433	67.0333	41.1167	152.233	105.66	155.315
EC:2.1.1.184	23S rRNA (adenine(2085)-N(6))-dimethyltransferase	4.66667	0	0	1.66667	0	0	0	4.66667	1.33333	4.16667
EC:2.1.1.185	23S rRNA (guanosine(2251)-2'-O)-methyltransferase	231.863	12.5267	25.61	23.5667	31.6433	61.4767	39.95	155.9	103.437	149.432
EC:2.1.1.186	23S rRNA (cytidine(2498)-2'-O)-methyltransferase	66.95	1.52667	2.5	1.84333	1.86667	14.5333	17.7833	22.4	13.6	12.5283
EC:2.1.1.187	23S rRNA (guanine(745)-N(1))-methyltransferase	60.6167	4.52667	2	5.67667	4.31	20.0333	14.1167	31.4	18.2667	29.0283
EC:2.1.1.189	23S rRNA (uracil(747)-C(5))-methyltransferase	5.86667	2.66667	1.66667	1	5.2	15.0333	2.53333	6.06667	2.26667	11.2333
EC:2.1.1.190	23S rRNA (uracil(1939)-C(5))-methyltransferase	211.28	11.86	24.61	24.6233	22.2	54.1433	39.45	127.233	93.27	129.815
EC:2.1.1.191	23S rRNA (cytosine(1962)-C(5))-methyltransferase	208.697	10.0533	24.72	21.3567	17.8667	66.98	54.8667	139.067	94.1067	121.582
EC:2.1.1.192	23S rRNA (adenine(2503)-C(2))-methyltransferase	262.057	14.1933	31.72	26.79	33.6433	72.0333	55.2833	175.233	117.327	174.76
EC:2.1.1.193	16S rRNA (uracil(1498)-N(3))-methyltransferase	205.723	12.86	22.3867	19.5667	29.9767	58.3667	41.6167	139.233	96.4367	140.315
EC:2.1.1.195	Cobalt-precorrin-5B (C(1))-methyltransferase	62.1367	3.33333	4.66667	3	5	10	9.66667	49.8333	25.6133	36.875
EC:2.1.1.196	Cobalt-precorrin-6B (C(15))-methyltransferase (decarboxylating)	22	1	1	0	0	2	2.66667	19.6667	4.22333	7.33333
EC:2.1.1.197	Malonyl-[acyl-carrier protein] O-methyltransferase	92.3367	3.52667	8.5	4.84333	3.2	20.5333	25.45	47.4	36.7667	30.75
EC:2.1.1.198	16S rRNA (cytidine(1402)-2'-O)-methyltransferase	263.89	14.86	34.0533	27.5667	35.6433	69.0867	49.95	192.9	142.993	181.51
EC:2.1.1.199	16S rRNA (cytosine(1402)-N(4))-methyltransferase	238.833	13.1933	28.83	24.5667	32.6433	67.9233	41.6167	151.233	107.883	156.315
EC:2.1.1.200	tRNA (cytidine(32)/uridine(32)-2'-O)-methyltransferase	65.7833	2.19333	3.83333	1.84333	1.86667	15.0333	16.1167	22.4	20.9333	8.52833
EC:2.1.1.201	2-methoxy-6-polyprenyl-1,4-benzoquinol methylase	300.557	13.86	28.0533	23.5667	34.6433	65.7	43.7833	193.233	114.77	163.232
EC:2.1.1.206	tRNA (cytidine(56)-2'-O)-methyltransferase	0	0	0	0	0	0	0	1	0	0.5
EC:2.1.1.207	tRNA (cytidine(34)-2'-O)-methyltransferase	155.92	11.1933	17.61	17.2333	17.5333	43.7567	38.2833	81.5667	61.9367	85.82
EC:2.1.1.210	Demethylspheroidene O-methyltransferase	3	0.666667	0	0	0	0	0	0	1.33333	0
EC:2.1.1.213	tRNA (guanine(10)-N(2))-dimethyltransferase	0	0	0	0	0	0	0	1	0	0.5
EC:2.1.1.215	tRNA (guanine(26)-N(2)/guanine(27)-N(2))-dimethyltransferase	0	0	0	0	0	0	0	1	0	0.5
EC:2.1.1.216	tRNA (guanine(26)-N(2))-dimethyltransferase	0	0	0	0	0	0	0	1	0	0.5
EC:2.1.1.217	tRNA (adenine(22)-N(1))-methyltransferase	23.1667	3.66667	5	7	4	21	5.33333	19.8333	15.5567	28.3333
EC:2.1.1.219	tRNA (adenine(57)-N(1)/adenine(58)-N(1))-methyltransferase	21.8333	1.33333	2.33333	2.83333	6.11	5.33333	1.66667	40.6667	9.66667	28.4167
EC:2.1.1.220	tRNA (adenine(58)-N(1))-methyltransferase	21.8333	1.33333	2.33333	2.83333	6.11	5.33333	1.66667	40.6667	9.66667	28.4167
EC:2.1.1.222	2-polyprenyl-6-hydroxyphenol methylase	137.42	6.86	12.5	8.17667	11.8667	28.5333	32.95	57.7333	42.1567	53.0983
EC:2.1.1.223	tRNA(1)(Val) (adenine(37)-N(6))-methyltransferase	5.47667	2.52667	2.11	1.17667	3.2	13.4767	3.45	6.06667	19.49	12.3567
EC:2.1.1.226	23S rRNA (cytidine(1920)-2'-O)-methyltransferase	122.803	7.33333	18	19.0567	26.11	40.1667	13.5	98.5	51.6133	110.292
EC:2.1.1.227	16S rRNA (cytidine(1409)-2'-O)-methyltransferase	122.803	7.33333	18	19.0567	26.11	40.1667	13.5	98.5	51.6133	110.292
EC:2.1.1.228	tRNA (guanine(37)-N(1))-methyltransferase	236.723	12.86	28.3867	24.5667	32.6433	67.0333	41.6167	152.233	105.66	154.815
EC:2.1.1.242	16S rRNA (guanine(1516)-N(2))-methyltransferase	48.2	1.52667	3.33333	1.84333	1.86667	14.0333	12.45	17.4	14.9333	7.65333
EC:2.1.1.245	Co-methyltransferase	0	0	0	0	0	0	0	6.16667	0	1.16667
EC:2.1.1.246	methyltransferase	0	0	0	0	0	0	0	0	0	0.333333
EC:2.1.1.250	[Trimethylamine--corrinoid protein] Co-methyltransferase	7	0.666667	0	0	0	0	5.66667	0	7.33333	7.16667
EC:2.1.1.254	Erythromycin 3''-O-methyltransferase	0	0	0	0	0	0	0	0	0	0
EC:2.1.1.255	Geranyl diphosphate 2-C-methyltransferase	0	0	0	0	0.11	0	0	5.33333	0	0
EC:2.1.1.256	tRNA (guanine(6)-N(2))-methyltransferase	0	0	0	0	0	0	0	0	0	0
EC:2.1.1.257	tRNA (pseudouridine(54)-N(1))-methyltransferase	0.25	1.52667	0	1.17667	0	11	0.25	1	0	0.045
EC:2.1.1.258	Co-methyltransferase	0	0	0	0	0	0	0	6.16667	0	0.666667
EC:2.1.1.260	rRNA small subunit pseudouridine methyltransferase Nep1	0	0	0	0	0	0	0	0	0	0.5
EC:2.1.1.264	23S rRNA (guanine(2069)-N(7))-methyltransferase	65.45	1.52667	3.83333	1.84333	1.86667	15.0333	16.1167	22.4	17.2667	12.8617
EC:2.1.1.265	Tellurite methyltransferase	0.866667	0	0	0	0.2	0.366667	2.53333	5.73333	2.26667	1.4
EC:2.1.1.266	23S rRNA (adenine(2030)-N(6))-methyltransferase	101.92	6.19333	11.5	6.51	8.2	25.0333	29.2833	47.4	35.49	45.4867
EC:2.1.1.268	tRNA(Thr) (cytosine(32)-N(3))-methyltransferase	0.666667	0	0	0	0	0	0	0	0	0
EC:2.1.1.269	Dimethylsulfoniopropionate demethylase	3.66667	0	0	0	0	0	0	0	1.33333	0
EC:2.1.1.271	Cobalt-precorrin-4 methyltransferase	85.97	6	7.66667	4.66667	16.4433	17	13.5	58.8333	32.9467	59.2917
EC:2.1.1.289	Cobalt-precorrin-7 (C(5))-methyltransferase	0.666667	0	1	0	0	1	0	0	1.22333	3.66667
EC:2.1.1.294	3-phospho-methyltransferase	3	0	0.333333	0	0	1.83333	1.33333	1	0.333333	1.33333
EC:2.1.1.295	2-methyl-6-phytyl-1,4-hydroquinone methyltransferase	26	1	0	0	0	1	2.66667	19.6667	3	6
EC:2.1.1.297	Peptide chain release factor N(5)-glutamine methyltransferase	255.39	12.86	31.72	26.9	43.53	69.7	44.95	169.567	109.66	180.315
EC:2.1.1.298	Ribosomal protein L3 N(5)-glutamine methyltransferase	88.7833	3.52667	8.5	4.84333	5.53333	20.5333	25.45	47.4	34.6	32.8617
EC:2.1.1.33	tRNA (guanine(46)-N(7))-methyltransferase	178.833	13.1933	20.1633	18.9	25.6433	55.4233	40.6167	102.9	87.7167	123.398
EC:2.1.1.34	tRNA (guanosine(18)-2'-O)-methyltransferase	41.5033	2.19333	1.55333	1.4	7.2	13.7533	3.45	4.73333	17.3233	19.9183
EC:2.1.1.35	tRNA (uracil(54)-C(5))-methyltransferase	28.45	1.52667	2.66667	2.51	0.866667	13.0333	12.45	17.4	18.6	9.27833
EC:2.1.1.37	DNA (cytosine-5-)-methyltransferase	146.087	9	17.61	11	9.42	24.7567	40.7	133.9	56.8233	72.6467
EC:2.1.1.43	Histone-lysine N-methyltransferase	0	0	0	0	0	0	0	0	0	0
EC:2.1.1.44	L-histidine N(alpha)-methyltransferase	27.3333	0	3	3.33333	8.44333	7	1.66667	23	2.66667	21.6667
EC:2.1.1.45	Thymidylate synthase	145.837	10.1933	18.9433	12.5667	22.8667	48.6433	32.6167	82.7333	72.6033	101.46
EC:2.1.1.5	Betaine--homocysteine S-methyltransferase	3	0	0	0	0	0	0	0	0	0
EC:2.1.1.6	Catechol O-methyltransferase	2.66667	0	0	0	1	0	0	0	0	0.5
EC:2.1.1.61	tRNA (5-methylaminomethyl-2-thiouridylate)-methyltransferase	71.7833	2.86	8	5.51	2.86667	18.8667	21.7833	42.4	32.2667	31.445
EC:2.1.1.63	Methylated-DNA--[protein]-cysteine S-methyltransferase	360.753	21.86	48.0533	38.0133	42.1733	101.4	89.15	245.967	158.82	233.02
EC:2.1.1.64	3-demethylubiquinol 3-O-methyltransferase	137.42	6.86	12.5	8.17667	11.8667	28.5333	32.95	57.7333	42.1567	53.0983
EC:2.1.1.67	Thiopurine S-methyltransferase	45.36	1.86	2.94333	1.84333	2.66667	13.4433	9.91667	12.6667	11.6667	8.74
EC:2.1.1.71	Phosphatidyl-N-methylethanolamine N-methyltransferase	16.97	5.33333	7.33333	3.33333	9.33333	6.66667	4.33333	0	0.556667	19.0417
EC:2.1.1.72	Site-specific DNA-methyltransferase (adenine-specific)	545.217	33.2467	69.0467	62.76	74.1767	171.847	100.65	418.3	243.38	380.553
EC:2.1.1.74	(FADH(2)-oxidizing)	50.36	5.66667	9.33333	8.55667	12.6667	16.3333	7.5	44.5	21.4467	51.2917
EC:2.1.1.77	Protein-L-isoaspartate(D-aspartate) O-methyltransferase	258.39	17.5267	39.8867	24.0667	36.9767	61.2	51.6167	126.4	98.4933	152.697
EC:2.1.1.79	Cyclopropane-fatty-acyl-phospholipid synthase	294.87	14.1933	37	21.79	46.9533	64.7333	75.65	147.467	83.48	156.678
EC:2.1.1.80	Protein-glutamate O-methyltransferase	394.5	23.1933	51.94	38.96	44.2	88.7	101.117	260.233	161.11	232.25
EC:2.1.1.86	Tetrahydromethanopterin S-methyltransferase	0	0	0	0	0	0	0	0	0	0
EC:2.1.1.95	Tocopherol O-methyltransferase	0	0	1.66667	0	0	0	2.66667	19.6667	3	1.83333
EC:2.1.1.98	Diphthine synthase	0	0	0	0	0	0	0	1	0	0.5
EC:2.1.2.1	Glycine hydroxymethyltransferase	328.973	15.72	33.0533	29.41	33.8633	84.7	70.8667	199.233	138.327	188.027
EC:2.1.2.10	Aminomethyltransferase	262.057	12.86	30.72	25.2333	33.9767	72.3667	52.2833	157.9	107.937	165.348
EC:2.1.2.11	3-methyl-2-oxobutanoate hydroxymethyltransferase	222.447	10.86	23.3867	20.5667	27.9767	61.3667	40.6167	132.9	98.4367	137.148
EC:2.1.2.13	UDP-4-amino-4-deoxy-L-arabinose formyltransferase	0.866667	0	0	0	0.2	0.366667	2.53333	4.73333	2.26667	1.4
EC:2.1.2.2	Phosphoribosylglycinamide formyltransferase	317.673	17.72	37.22	28.91	41.51	89.4	68.5667	185.3	133.65	190.927
EC:2.1.2.3	Phosphoribosylaminoimidazolecarboxamide formyltransferase	239.64	12.86	27.72	24.5667	32.6433	67.0333	41.6167	136.9	101.993	157.115
EC:2.1.2.5	Glutamate formimidoyltransferase	30.4167	0	2.66667	3	3	2	1	36.6667	12.3333	19.6667
EC:2.1.2.9	Methionyl-tRNA formyltransferase	264.223	16.1933	36.0533	29.2333	38.0867	73.7	50.95	180.9	125.217	181.565
EC:2.1.3.1	Methylmalonyl-CoA carboxytransferase	9.33333	0	0	0	0	4	0	8	8	12.1117
EC:2.1.3.11	N-succinylornithine carbamoyltransferase	2.77667	1	1.11	0	2.33333	1.77667	0	1.33333	17.2233	6.41167
EC:2.1.3.2	Aspartate carbamoyltransferase	245.057	12.86	28.3867	24.5667	32.6433	68.3667	41.6167	152.233	111.993	164.815
EC:2.1.3.3	Ornithine carbamoyltransferase	221.697	9.86	21.11	21.5667	29.31	60.4233	37.6167	132.567	77.2133	127.987
EC:2.1.3.6	Putrescine carbamoyltransferase	2	0	0.666667	0	0	0	0	15.3333	5	1.16667
EC:2.1.3.7	3-hydroxymethylcephem carbamoyltransferase	0	0	0	0	0	0	0	0	0	0
EC:2.1.3.9	N-acetylornithine carbamoyltransferase	24.3333	0.666667	1.83333	1.55667	0	1	3.66667	20.3333	8.33333	5.58333
EC:2.1.4.1	Glycine amidinotransferase	8.33333	0	0	0	0	1	0	2	1.33333	3
EC:2.10.1.1	Molybdopterin molybdotransferase	329.557	19.72	36.0533	32.0767	41.7533	87.2	62.2	221.9	128.603	188.143
EC:2.2.1.1	Transketolase	366.767	16.0533	38.83	35.6333	48.35	106.41	63.3	251.933	180.407	259.047
EC:2.2.1.10	2-amino-3,7-dideoxy-D-threo-hept-6-ulosonate synthase	0	0	0	0	0	0	0	1	1	0
EC:2.2.1.2	Transaldolase	286.95	14.86	34.1633	29.1233	34.62	72.6767	56.65	199.3	119.76	181.415
EC:2.2.1.6	Acetolactate synthase	837.367	44.1067	88.2167	73.4867	104.483	206.323	169.933	485.7	296.697	484.703
EC:2.2.1.7	1-deoxy-D-xylulose-5-phosphate synthase	213.39	12.86	21.72	21.01	32.0867	61.3667	41.2833	124.567	95.27	139.282
EC:2.2.1.9	synthase	81.9767	6.52667	6.11	8.23333	15.8667	32.31	7.11667	62.4	34.3233	62.5233
EC:2.3.1.1	Amino-acid N-acetyltransferase	290.89	15.72	40.22	32.1867	35.0867	94.1467	67.0333	209.567	132.993	188.032
EC:2.3.1.101	Formylmethanofuran--tetrahydromethanopterin N-formyltransferase	13.61	0.333333	0.776667	0	1	4.22333	1.66667	0	8.55667	8.13833
EC:2.3.1.102	N(6)-hydroxylysine O-acetyltransferase	0	0	0	0	0	0	0	0	0	0
EC:2.3.1.109	Arginine N-succinyltransferase	182.45	4.19333	19.3333	10.0667	6.86667	31.3667	53.2833	104.4	68.6	60.445
EC:2.3.1.117	2,3,4,5-tetrahydropyridine-2,6-dicarboxylate N-succinyltransferase	147.03	9.19333	17.61	10.0667	19.31	35.6433	31.6167	74.0667	57.88	87.5983
EC:2.3.1.118	N-hydroxyarylamine O-acetyltransferase	49.0267	0.526667	3.77667	0.843333	1.22	4.39	10.9167	28	18.2233	16.3783
EC:2.3.1.12	Dihydrolipoyllysine-residue acetyltransferase	332.47	22.72	35.6633	27.8	38.0867	97.7567	69.3667	155.733	118.607	191.157
EC:2.3.1.122	Trehalose O-mycolyltransferase	13.8333	0	0	0.5	5	0	2	1	0	5.08333
EC:2.3.1.128	Ribosomal-protein-alanine N-acetyltransferase	352.393	37.2467	53.83	64.31	64.95	146.123	75.65	268.967	162.54	324.005
EC:2.3.1.129	Acyl-[acyl-carrier-protein]--UDP-N-acetylglucosamine O-acyltransferase	157.64	9.19333	14.72	11.8433	14.5333	39.5333	38.45	75.4	79.9933	76.3933
EC:2.3.1.15	Glycerol-3-phosphate 1-O-acyltransferase	469.343	27.2467	53.72	50.9767	52.9333	129.547	86.35	263.2	186.03	276.28
EC:2.3.1.157	Glucosamine-1-phosphate N-acetyltransferase	245.863	13.1933	27.2767	22.2333	30.31	72.9233	45.1167	155.9	91.77	141.57
EC:2.3.1.16	Acetyl-CoA C-acyltransferase	252.313	13.3867	38.0533	30.1333	36.3967	83.4	59.9	180.467	100.203	174.072
EC:2.3.1.168	Dihydrolipoyllysine-residue (2-methylpropanoyl)transferase	49.1933	4.33333	8	7.66667	9.66667	14	7.33333	12.6667	13.89	30.985
EC:2.3.1.169	CO-methylating acetyl-CoA synthase	0	0	0	0	0	0	0	0	0	0.333333
EC:2.3.1.174	3-oxoadipyl-CoA thiolase	24.3333	0	2.66667	0.666667	0	3.16667	9.66667	13	8	7.83333
EC:2.3.1.178	Diaminobutyrate acetyltransferase	27.25	2.19333	0	1.17667	1.11	10.3333	4.25	5.66667	3.66667	3.71167
EC:2.3.1.179	Beta-ketoacyl-[acyl-carrier-protein] synthase II	349.167	21.0533	43.6033	31.2467	52.17	118.017	80.9	219.3	143.323	228.538
EC:2.3.1.18	Galactoside O-acetyltransferase	0.916667	0.193333	0	0.176667	0	0.166667	0.25	0	0	0.045
EC:2.3.1.180	Beta-ketoacyl-[acyl-carrier-protein] synthase III	294.113	23.0533	34.8833	34.0267	44.39	111.01	66.9	213.633	156.487	239.663
EC:2.3.1.181	Lipoyl(octanoyl) transferase	204.807	10.5267	24.0533	14.9	23.9767	46.7	39.95	109.067	76.6033	113.182
EC:2.3.1.182	(R)-citramalate synthase	1	0.666667	0	0.666667	0	0	0	1.33333	4.83333	0.966667
EC:2.3.1.183	Phosphinothricin acetyltransferase	200.03	13.3333	23.1667	22.1667	24.6433	55.3667	47.7	141.733	100.66	139.122
EC:2.3.1.184	Acyl-homoserine-lactone synthase	1.11667	0.193333	0	0.176667	0.2	0.2	3.78333	4.4	3.6	1.445
EC:2.3.1.187	Acetyl-S-ACP:malonate ACP transferase	64	2.66667	6.66667	5	2.33333	8.66667	22.6667	42	26.3333	28.1667
EC:2.3.1.189	Mycothiol synthase	12.8333	1.33333	1.66667	2.16667	6.11	4.33333	1.66667	22.3333	2.66667	19.9167
EC:2.3.1.19	Phosphate butyryltransferase	14.4167	2.66667	7.66667	6	0	8.33333	9.83333	24	13.6667	22.6667
EC:2.3.1.191	UDP-3-O-(3-hydroxymyristoyl)glucosamine N-acyltransferase	160.167	9.52667	17.1633	12.51	17.5333	41.9767	40.1167	75.4	88.9933	86.26
EC:2.3.1.193	tRNA(Met) cytidine acetyltransferase	21.7833	1.52667	0	1.17667	1.86667	10.7	2.78333	4.73333	5.93333	1.445
EC:2.3.1.20	Diacylglycerol O-acyltransferase	23.8333	0	5	0.5	17.3333	5.33333	2	1	0	27.0833
EC:2.3.1.200	Lipoyl amidotransferase	0	0	0	0	0	0	0	0	0	0
EC:2.3.1.201	UDP-2-acetamido-3-amino-2,3-dideoxy-glucuronate N-acetyltransferase	4	0	0	0.223333	0.666667	0.666667	0.666667	0	14.39	5.83333
EC:2.3.1.202	UDP-4-amino-4,6-dideoxy-N-acetyl-beta-L-altrosamine N-acetyltransferase	0.666667	0	0	0	0	0	0	0	0	0
EC:2.3.1.204	Octanoyl-[GcvH]:protein N-octanoyltransferase	7.66667	2.33333	2	5.33333	2.33333	7	0	0	7	16.3333
EC:2.3.1.207	Beta-ketodecanoyl-[acyl-carrier-protein] synthase	58.6667	1.33333	6.66667	3.66667	1.66667	6.33333	21.3333	36.6667	21.6667	16.8333
EC:2.3.1.210	dTDP-4-amino-4,6-dideoxy-D-galactose acyltransferase	0.866667	0	0	0	0.2	0.366667	2.53333	4.73333	2.26667	1.4
EC:2.3.1.223	3-oxo-5,6-didehydrosuberyl-CoA thiolase	1.66667	0	0.666667	0	0	0.166667	0	0.333333	0	2.33333
EC:2.3.1.228	Isovaleryl-homoserine lactone synthase	8	2	4	1.66667	3	2	2	0	0	5
EC:2.3.1.229	4-coumaroyl-homoserine lactone synthase	8	2	4	1.66667	3	2	2	0	0	5
EC:2.3.1.233	1,3,6,8-tetrahydroxynaphthalene synthase	0	0	0	0	0.11	0	1.33333	0	0	0
EC:2.3.1.234	N(6)-L-threonylcarbamoyladenine synthase	239.39	12.86	28.3867	25.2333	32.6433	67.3667	42.7833	155.4	111.55	156.815
EC:2.3.1.235	Tetracenomycin F2 synthase	0	0	0	0	0.11	0	0	0	0	0
EC:2.3.1.241	Kdo(2)-lipid IV(A) lauroyltransferase	265.5	11.2467	30.5533	22.81	21.9767	63.3667	61.6167	135.067	118.273	118.517
EC:2.3.1.242	Kdo(2)-lipid IV(A) palmitoleoyltransferase	0.866667	0	0	0	0.2	0.366667	2.53333	4.73333	2.26667	1.4
EC:2.3.1.243	Lauroyl-Kdo(2)-lipid IV(A) myristoyltransferase	1.11667	1.52667	0	1.17667	0.2	10.7	2.78333	4.73333	2.26667	1.445
EC:2.3.1.28	Chloramphenicol O-acetyltransferase	3.03333	3.05333	0	2.35333	0.2	21.5333	3.03333	4.73333	11.9333	5.32333
EC:2.3.1.29	Glycine C-acetyltransferase	94.6967	8.86	12.83	12.0667	12.31	37.81	22.1167	75.7333	75.27	84.835
EC:2.3.1.30	Serine O-acetyltransferase	288.973	17.86	41.22	30.1233	28.2	75.2	69.6167	216.233	137.603	171.865
EC:2.3.1.31	Homoserine O-acetyltransferase	168.72	7	15.4433	7.5	18	28.11	30	71.6667	50.39	75.8067
EC:2.3.1.35	Glutamate N-acetyltransferase	191.413	9.66667	23.7767	21.1667	27.4433	51.7233	35.1667	130.5	77.78	128.125
EC:2.3.1.37	5-aminolevulinate synthase	26.97	4	4	1.66667	8	6	3.83333	0	4.22333	14.7917
EC:2.3.1.39	[Acyl-carrier-protein] S-malonyltransferase	306.39	15.5267	34.3867	29.29	37.42	78.0333	66.1167	177.9	126.993	186.927
EC:2.3.1.4	Glucosamine-phosphate N-acetyltransferase	0	0	0	0	0	0	0	0	0	0
EC:2.3.1.40	Acyl-[acyl-carrier-protein]--phospholipid O-acyltransferase	7.81	2.33333	3.77667	1.66667	4.2	8.59	5.53333	4.73333	4.49	10.8167
EC:2.3.1.41	Beta-ketoacyl-[acyl-carrier-protein] synthase I	147.98	8.38667	11.8867	6.24333	11.4	38.7867	35.2333	57.4667	44.3167	49.6717
EC:2.3.1.46	Homoserine O-succinyltransferase	14.6433	5.19333	2	5.84333	3.53333	18.8667	6.11667	11.9	13.3233	23.4533
EC:2.3.1.47	8-amino-7-oxononanoate synthase	199.75	7.19333	19.3867	13.0667	13.9767	39.0333	49.1167	134.067	72.27	93.1817
EC:2.3.1.48	Histone acetyltransferase	6.33333	0	0.666667	0.666667	0	0	0	16.3333	5	4.33333
EC:2.3.1.5	Arylamine N-acetyltransferase	0	0	0	0	0	0	0	1	0	0
EC:2.3.1.50	Serine C-palmitoyltransferase	0.443333	0	0	0	0	0	0	0	0	0
EC:2.3.1.51	1-acylglycerol-3-phosphate O-acyltransferase	427.97	24.86	51.83	41.9033	57.3067	110.643	74.7833	271.9	180.773	279.497
EC:2.3.1.54	Formate C-acetyltransferase	37.45	6.05333	5	5.68667	3.2	25.8667	3.03333	19.2333	12.9333	31.9567
EC:2.3.1.57	Diamine N-acetyltransferase	33.56	7.19333	7.11	12.51	8.31	18.1433	12.7833	40.4	29.9333	52.8983
EC:2.3.1.59	Gentamicin 2'-N-acetyltransferase	7.33333	0	0	0	1.11	0	0	5.33333	0	2.16667
EC:2.3.1.60	Gentamicin 3'-N-acetyltransferase	0	0	0	0	0	0	0	0	0	0
EC:2.3.1.61	Dihydrolipoyllysine-residue succinyltransferase	190.917	13.5267	24.4967	17.2333	33.31	61.81	36.45	103.733	95.8267	139.96
EC:2.3.1.7	Carnitine O-acetyltransferase	0	0	0	0	0	0	0	0	0	0
EC:2.3.1.79	Maltose O-acetyltransferase	28.67	5.05333	3.55333	7.74333	6.86667	26.7	7.7	11.0667	17.5467	29.485
EC:2.3.1.8	Phosphate acetyltransferase	134.283	9.86	19.3333	18.3433	11.9767	35.3667	37.45	86.5667	62.4333	88.9533
EC:2.3.1.81	Aminoglycoside N(3')-acetyltransferase	8.44333	0	0.666667	1.66667	0.11	0	0.666667	26	5	9.16667
EC:2.3.1.82	Aminoglycoside 6'-N-acetyltransferase	39.3333	3.66667	5.33333	6.33333	11	10.3333	6	6	6.89	37.5
EC:2.3.1.88	Peptide alpha-N-acetyltransferase	0	0	0	0	0	0	0	0	0	0
EC:2.3.1.89	Tetrahydrodipicolinate N-acetyltransferase	7	2.33333	3	5.33333	2.33333	8	0	0	2.33333	18.5
EC:2.3.1.9	Acetyl-CoA C-acetyltransferase	871.077	42.58	103.663	77.09	130.103	202.443	151.083	467.5	277.12	503.275
EC:2.3.2.10	UDP-N-acetylmuramoylpentapeptide-lysine N(6)-alanyltransferase	0	0	0	0	0	0	0	0	0	0
EC:2.3.2.13	Protein-glutamine gamma-glutamyltransferase	1	0	0.666667	0	0	0	0	0	0	5.83333
EC:2.3.2.16	Lipid II:glycine glycyltransferase	1.33333	0	0	0	0	0	0	0	0	0.333333
EC:2.3.2.17	glycyltransferase	1.33333	0	0	0	0	0	0	0	0	0
EC:2.3.2.18	glycyltransferase	1.33333	0	0	0	0	0	0	0	0	0
EC:2.3.2.2	Gamma-glutamyltransferase	356.42	21.5267	44.9967	28.5133	52.2867	87.9567	60.8167	162.133	128.093	229.873
EC:2.3.2.21	Cyclo(L-tyrosyl-L-tyrosyl) synthase	0	0	0	0	0	0	0.666667	0	0	0
EC:2.3.2.27	RING-type E3 ubiquitin transferase	0	0	0	0	0	0	0	0	0	0
EC:2.3.2.3	Lysyltransferase	81.3033	0	4.66667	0.89	1.66667	4	15.3333	17.6667	18.2233	17.375
EC:2.3.2.5	Glutaminyl-peptide cyclotransferase	13.11	1.66667	5.11	3	1	4.11	9.33333	24	8.66667	11.945
EC:2.3.2.6	Leucyltransferase	160.14	9.19333	17.0533	9.06667	18.8667	37.8667	32.95	85.0667	54.7133	79.3983
EC:2.3.2.8	Arginyltransferase	107.553	6.19333	13.1667	9.06667	10	26.1667	26.75	44	36.4467	44.975
EC:2.3.3.1	Citrate (Si)-synthase	313.39	20.1933	43.22	35.8467	50.64	92.3667	55.95	218.9	127.27	234.578
EC:2.3.3.10	Hydroxymethylglutaryl-CoA synthase	26.3333	0.666667	2.33333	1.55667	0	0.666667	4	34.6667	12.8333	16.1667
EC:2.3.3.13	2-isopropylmalate synthase	409.477	20.1933	45.83	41.9	53.62	103.957	74.15	290.467	168.983	258.923
EC:2.3.3.14	Homocitrate synthase	2.66667	0	2.66667	0	0	1	0	0	1	7.16667
EC:2.3.3.15	Sulfoacetaldehyde acetyltransferase	16.75	1.33333	4.66667	3	0	5	10.3333	24	11	13.5417
EC:2.3.3.5	2-methylcitrate synthase	89.9167	4.19333	8.5	5.34333	1.66667	22	22.9167	42.6667	31	31.3783
EC:2.3.3.8	ATP citrate synthase	0	0	0	0	0	0	0	0	0	1
EC:2.3.3.9	Malate synthase	152.727	11.3867	15.1667	14.41	15.7533	39.5333	35.5333	72.0667	53.1567	81.865
EC:2.4.1.1	Glycogen phosphorylase	207.287	7.86	15.4433	13.9	22.8433	53.6233	29.3167	141.467	82.3133	124.062
EC:2.4.1.10	Levansucrase	8.44333	0	1.66667	0.666667	0.333333	0.666667	4	11.6667	6	4.83333
EC:2.4.1.11	Glycogen(starch) synthase	23.3333	0	0.666667	4.33333	1	0	1	23.6667	2.66667	12.8333
EC:2.4.1.117	Dolichyl-phosphate beta-glucosyltransferase	0	0	0	0	0.11	0	0	0	0	2.16667
EC:2.4.1.12	Cellulose synthase (UDP-forming)	46.6433	9	6.33333	5.33333	6.31	31.0333	8.53333	30.7333	12.49	30.2333
EC:2.4.1.129	Peptidoglycan glycosyltransferase	115.617	6.19333	9.83333	8.84333	16.6433	41.8667	18.7833	76.2333	29.2667	63.6117
EC:2.4.1.13	Sucrose synthase	0	0	0	0	0	0	0	0	0	0
EC:2.4.1.14	Sucrose-phosphate synthase	4.16667	1.33333	0.333333	1	1.66667	14.3333	1.66667	0	0	2.08333
EC:2.4.1.144	Beta-1,4-mannosyl-glycoprotein 4-beta-N-acetylglucosaminyltransferase	1	0	0	0	0	0	0	0	0	0
EC:2.4.1.15	Alpha,alpha-trehalose-phosphate synthase (UDP-forming)	118.17	6.33333	15.61	10.39	19.31	24.9767	17.2	80.7333	47.6567	94.6633
EC:2.4.1.161	Oligosaccharide 4-alpha-D-glucosyltransferase	0	0	0	0	0	0	0	0	0	0
EC:2.4.1.173	Sterol 3-beta-glucosyltransferase	5.66667	0	0	0	0	0	0	5.66667	1.16667	2.33333
EC:2.4.1.18	1,4-alpha-glucan branching enzyme	221.473	11.1933	20.9967	17.9	29.0867	61.7567	33.1167	129.067	77.9367	144.44
EC:2.4.1.180	Lipopolysaccharide N-acetylmannosaminouronosyltransferase	0.866667	0	0	0	0.2	0.366667	2.53333	4.73333	2.26667	1.4
EC:2.4.1.182	Lipid-A-disaccharide synthase	178.39	10.1933	16.0533	11.8433	15.2	40.2	42.1167	95.0667	80.8267	82.1483
EC:2.4.1.187	mannosaminyltransferase	56.8333	2.33333	4	8.66667	8.66667	19.8333	4.83333	61.1667	21.7233	45.0833
EC:2.4.1.19	Cyclomaltodextrin glucanotransferase	0	0	0.5	0	0	0.333333	0	0	0	0.583333
EC:2.4.1.20	Cellobiose phosphorylase	0.333333	0	0	0	0	0	0	5.33333	0	3.46667
EC:2.4.1.208	Diglucosyl diacylglycerol synthase (1,2-linking)	0	0	0	0	0	0	0	0	0	0
EC:2.4.1.21	Starch synthase	186.64	12.86	22.9967	19.4567	27.31	50.1433	27.7833	99.9	79.88	130.385
EC:2.4.1.211	1,3-beta-galactosyl-N-acetylhexosamine phosphorylase	2.33333	0	0	0	0	1	0	1.66667	1.33333	3.5
EC:2.4.1.212	Hyaluronan synthase	4.66667	0	0	0.223333	0	0	0	0	0	4
EC:2.4.1.213	Glucosylglycerol-phosphate synthase	0	0.666667	0	0	0	0	0	0	0	0
EC:2.4.1.217	Mannosyl-3-phosphoglycerate synthase	0	0	0	0	0	0	0	0	0	0.5
EC:2.4.1.227	acetylglucosaminyltransferase	235.613	12.5267	25.9433	23.5667	32.6433	66.1433	42.2833	156.567	103.437	153.982
EC:2.4.1.230	Kojibiose phosphorylase	0	0	0	0	0	0	0	0	0	0.333333
EC:2.4.1.245	Alpha,alpha-trehalose synthase	18.5	0	1.33333	1.66667	4	7.83333	0	12	0	10.75
EC:2.4.1.246	Mannosylfructose-phosphate synthase	0.666667	0	0	0	0	0	0	0	0	0
EC:2.4.1.247	Beta-D-galactosyl-(1->4)-L-rhamnose phosphorylase	0.666667	0	0	0	0	0	0	0	0	0
EC:2.4.1.25	4-alpha-glucanotransferase	135.477	3.52667	6.77667	6.23333	9.64333	25.4233	26.1167	87.5667	47.1567	64.9117
EC:2.4.1.250	D-inositol-3-phosphate glycosyltransferase	35.3333	1.33333	7	5.5	7.44333	7.83333	1.66667	43.3333	13.1667	31.3333
EC:2.4.1.266	Glucosyl-3-phosphoglycerate synthase	43.5	0	1.66667	2.16667	7.11	3.66667	2.66667	16.3333	7.66667	20.25
EC:2.4.1.276	Zeaxanthin glucosyltransferase	0	0	0	0	0	0	0	0	0	0
EC:2.4.1.279	Nigerose phosphorylase	0	0	0	0	0	0	0	0	0	0.333333
EC:2.4.1.280	N,N'-diacetylchitobiose phosphorylase	0.25	1.52667	0	1.17667	0	10.3333	0.25	0	0	0.378333
EC:2.4.1.281	4-O-beta-D-mannosyl-D-glucose phosphorylase	0.666667	0	0	0	1.33333	1	0	0	4	1.83333
EC:2.4.1.287	galactofuranosyltransferase	8.16667	0	1.66667	0.5	6	2.66667	1	5.66667	0	9.41667
EC:2.4.1.288	decaprenol beta-1,5/1,6-galactofuranosyltransferase	8.66667	1.33333	1.66667	0.5	6	3.33333	1	5.66667	0	12.9167
EC:2.4.1.289	N-acetylglucosaminyl-diphospho-decaprenol L-rhamnosyltransferase	3.16667	0	0	0.5	1	0	1	5.66667	0	1.91667
EC:2.4.1.291	4-alpha-N-acetylgalactosaminyltransferase	0	0	0	0	0	0	0	0	0.666667	1.83333
EC:2.4.1.310	Vancomycin aglycone glucosyltransferase	0	0	0	0	0	0	0	0	0	0
EC:2.4.1.315	Diglucosyl diacylglycerol synthase (1,6-linking)	23.3333	1.33333	5.66667	3.66667	1.66667	8	9.33333	35.8333	16.7233	25.3333
EC:2.4.1.319	Beta-1,4-mannooligosaccharide phosphorylase	0.666667	0	0	0	0	0.333333	0	0	2.16667	1.5
EC:2.4.1.320	1,4-beta-mannosyl-N-acetylglucosamine phosphorylase	0.666667	0	0	0	0	0.333333	0	0	2.16667	1.5
EC:2.4.1.325	TDP-N-acetylfucosamine:lipid II N-acetylfucosaminyltransferase	0.866667	0	0	0	0.2	0.366667	2.53333	4.73333	2.26667	1.4
EC:2.4.1.4	Amylosucrase	19.3333	1.33333	4.66667	3	0.666667	6.33333	9.83333	31.6667	11.1667	17.5
EC:2.4.1.44	Lipopolysaccharide 3-alpha-galactosyltransferase	0	0	0	0	0	0.333333	0	0	0	0
EC:2.4.1.46	Monogalactosyldiacylglycerol synthase	6.33333	0	1.33333	1.33333	0	0	0	15.3333	5	2.5
EC:2.4.1.5	Dextransucrase	0	0	0	0	0	0	0	0	0	0
EC:2.4.1.52	Poly(glycerol-phosphate) alpha-glucosyltransferase	2.66667	0	0	0	0	0	0	0	0	0
EC:2.4.1.57	Phosphatidylinositol alpha-mannosyltransferase	44.6667	0	6	6.5	5.11	10.5	1.66667	34.3333	11.3333	25.6667
EC:2.4.1.58	Lipopolysaccharide glucosyltransferase I	0	0	0	0	0	0.333333	0	0	0	0
EC:2.4.1.60	Abequosyltransferase	0	0	0	0	0	0	0.5	0	0	0
EC:2.4.1.64	Alpha,alpha-trehalose phosphorylase	26.8333	0	1.66667	4.33333	5.11	3.66667	1	25.6667	2	21.8333
EC:2.4.1.7	Sucrose phosphorylase	29	0	0	0	1	0.166667	1	1	5	3.33333
EC:2.4.1.8	Maltose phosphorylase	2.77667	0.333333	1.44333	0	1	1.44333	0	0	4.55667	8.77833
EC:2.4.1.80	Ceramide glucosyltransferase	18.7767	0	0.666667	0.223333	0.333333	0	0.5	0	11	9.945
EC:2.4.1.83	Dolichyl-phosphate beta-D-mannosyltransferase	177.02	4.33333	22.3833	15.6133	30.8867	53.17	32.5	206.5	90.23	129.912
EC:2.4.2.1	Purine-nucleoside phosphorylase	127.557	11.3867	17.44	19.5767	28.6433	65.2	18.0333	79.2333	66.1033	127.93
EC:2.4.2.10	Orotate phosphoribosyltransferase	243.89	12.86	29.0533	25.2333	33.9767	67.8667	41.6167	153.233	105.66	162.732
EC:2.4.2.12	Nicotinamide phosphoribosyltransferase	16.3333	0	0	0	0	1.33333	3.66667	6.33333	4.55667	4.16667
EC:2.4.2.14	Amidophosphoribosyltransferase	227.723	12.86	27.72	23.9	32.6433	67.0333	42.1167	136.9	98.4933	154.948
EC:2.4.2.17	ATP phosphoribosyltransferase	235.807	12.86	27.3867	24.5667	31.6433	66.0333	42.1167	151.233	103.437	150.148
EC:2.4.2.18	Anthranilate phosphoribosyltransferase	239.473	14.1933	27.3867	24.2333	34.9767	66.7	40.95	150.233	103.103	154.482
EC:2.4.2.19	Nicotinate-nucleotide diphosphorylase (carboxylating)	219.113	10.86	27.72	22.5667	30.31	62.7	40.6167	133.9	95.2133	142.648
EC:2.4.2.2	Pyrimidine-nucleoside phosphorylase	34.9433	2.66667	6.44333	7.33333	6.33333	13.89	2.66667	27.8333	17.5567	40.75
EC:2.4.2.21	Nicotinate-nucleotide--dimethylbenzimidazole phosphoribosyltransferase	119.72	7.52667	14.6667	14.01	21.8867	39.1667	25.4167	99.1667	51.06	89.8867
EC:2.4.2.22	Xanthine phosphoribosyltransferase	55.67	7.19333	8.66667	9.51	8.53333	24.7	15.7833	39.9	28.7133	45.37
EC:2.4.2.28	S-methyl-5'-thioadenosine phosphorylase	106.777	3.66667	15	9.89	19.4433	21.6667	6.83333	83.8333	26.7233	72.1667
EC:2.4.2.29	tRNA-guanine(34) transglycosylase	232.943	12.86	27.3867	22.9	27.5333	64.3667	42.95	156.233	105.273	139.982
EC:2.4.2.3	Uridine phosphorylase	6.72667	4.05333	2.77667	2.35333	2.53333	23.1433	3.7	11.7333	21.88	12.735
EC:2.4.2.37	NAD(+)--dinitrogen-reductase ADP-D-ribosyltransferase	0	0	0	0	0	0	0	0	0	0
EC:2.4.2.4	Thymidine phosphorylase	55.7833	7.52667	10.6667	7.51	13.31	25.5333	17.6167	48.4	21.9333	54.2233
EC:2.4.2.43	Lipid IV(A) 4-amino-4-deoxy-L-arabinosyltransferase	2.64333	0.333333	0.443333	0	1.2	0.81	2.53333	4.73333	2.26667	2.67833
EC:2.4.2.44	S-methyl-5'-thioinosine phosphorylase	55	0.666667	0.833333	0	1	3.66667	9.33333	6	9	2.58333
EC:2.4.2.45	Decaprenyl-phosphate phosphoribosyltransferase	3.16667	0	0	0.5	1	0	1	15.6667	0	2.25
EC:2.4.2.46	Galactan 5-O-arabinofuranosyltransferase	3.16667	0	0	0.5	1	0	1	1	0	1.91667
EC:2.4.2.47	Arabinofuranan 3-O-arabinosyltransferase	4.83333	0	0	0.5	1	1	1	1	0	2.58333
EC:2.4.2.48	tRNA-guanine(15) transglycosylase	0	0	0	0	0	0	0	1	0	0.5
EC:2.4.2.52	Triphosphoribosyl-dephospho-CoA synthase	71.81	3	7.44333	5	4.53333	14.2567	26.8667	46.7333	33.1567	34.8167
EC:2.4.2.53	Undecaprenyl-phosphate 4-deoxy-4-formamido-L-arabinose transferase	21.2	1.33333	4.66667	3	0.2	4.53333	11.8667	28.7333	17.2667	17.4
EC:2.4.2.54	Beta-ribofuranosylhydroxybenzene 5'-phosphate synthase	0	0	0	0	0	0	0	0	0	0.5
EC:2.4.2.57	AMP phosphorylase	0	0	0	0	0	0	0	1	0	0
EC:2.4.2.6	Nucleoside deoxyribosyltransferase	0	0	0	0	0	0	0	0	0	0
EC:2.4.2.7	Adenine phosphoribosyltransferase	217.75	10.1933	21.0533	22.2333	28.6433	59.0333	32.2833	122.233	85.4933	136.69
EC:2.4.2.8	Hypoxanthine phosphoribosyltransferase	215.003	11.5267	28.61	26.2333	29.9767	74.4233	38.45	145.9	100.493	149.037
EC:2.4.2.9	Uracil phosphoribosyltransferase	350.443	20.1933	42.2733	35.7333	46.7533	93.7533	66.7833	238.4	175.273	244.067
EC:2.4.99.12	Lipid IV(A) 3-deoxy-D-manno-octulosonic acid transferase	142.057	8.86	17.0533	12.51	14.2	40.5333	34.45	56.7333	76.4933	73.9817
EC:2.4.99.13	(Kdo)-lipid IV(A) 3-deoxy-D-manno-octulosonic acid transferase	142.057	8.86	17.0533	12.51	14.2	40.5333	34.45	56.7333	76.4933	73.9817
EC:2.4.99.14	(Kdo)(2)-lipid IV(A) (2-8) 3-deoxy-D-manno-octulosonic acid transferase	142.057	8.86	17.0533	12.51	14.2	40.5333	34.45	56.7333	76.4933	73.9817
EC:2.4.99.15	(Kdo)(3)-lipid IV(A) (2-4) 3-deoxy-D-manno-octulosonic acid transferase	142.057	8.86	17.0533	12.51	14.2	40.5333	34.45	56.7333	76.4933	73.9817
EC:2.4.99.16	Starch synthase (maltosyl-transferring)	61.3333	1.33333	3.66667	2.83333	7.55333	11.8333	11.3333	28	21.39	40.6667
EC:2.4.99.17	S-adenosylmethionine:tRNA ribosyltransferase-isomerase	216.14	11.5267	27.3867	21.6233	27.9767	63.0333	40.6167	126.9	110.717	139.698
EC:2.4.99.18	Dolichyl-diphosphooligosaccharide--protein glycotransferase	0	0	0	0	0	0	0	1	0	0.5
EC:2.5.1.1	Dimethylallyltranstransferase	253.223	14.86	26.3867	26.9	35.0833	69.3667	44.6167	173.9	110.993	164.648
EC:2.5.1.10	(2E,6E)-farnesyl diphosphate synthase	253.223	14.86	26.3867	26.9	35.0833	69.3667	44.6167	173.9	110.993	164.648
EC:2.5.1.101	N,N'-diacetyllegionaminate synthase	0	0	1.33333	0	0.666667	1.33333	1	0	3.55667	4.16667
EC:2.5.1.105	5'-phosphate synthase	2.5	0	0	0	0.666667	0.666667	0	2.33333	3.66667	5.16667
EC:2.5.1.108	2-(3-amino-3-carboxypropyl)histidine synthase	0	0	0	0	0	0	0	1	0	0.5
EC:2.5.1.114	tRNA(Phe) (4-demethylwyosine(37)-C(7)) aminocarboxypropyltransferase	0	0	0	0	0	0	0	1	0	0
EC:2.5.1.115	Homogentisate phytyltransferase	4.66667	0	0	0	0	0	2.66667	19.6667	3	2
EC:2.5.1.116	Homogentisate geranylgeranyltransferase	4.66667	0	0	0	0	0	2.66667	19.6667	3	2
EC:2.5.1.120	Aminodeoxyfutalosine synthase	13.61	1	2.77667	3	3.11	9.55667	3.33333	5.33333	9.22333	19.0833
EC:2.5.1.15	Dihydropteroate synthase	268.557	12.86	30.3867	26.7333	41.42	75.5333	43.2833	186.567	111.993	173.065
EC:2.5.1.16	Spermidine synthase	175.253	7.66667	20.2767	16.4467	14.9767	29.09	43.8667	97.5667	62.38	97.0117
EC:2.5.1.17	Cob(I)yrinic acid a,c-diamide adenosyltransferase	323.61	19.1933	39.72	32.0667	51.42	96.3667	71.45	253.067	151.163	218.473
EC:2.5.1.18	Glutathione transferase	938.267	47.5267	110.5	59.41	79.6667	162	245.083	499	281.56	424.587
EC:2.5.1.19	3-phosphoshikimate 1-carboxyvinyltransferase	241.39	12.86	28.3867	24.5667	31.7533	67.0333	42.7833	157.567	105.66	154.982
EC:2.5.1.21	Squalene synthase	34.3333	2.66667	0	1.66667	2.33333	5	2.66667	19.6667	11.6667	17.2217
EC:2.5.1.26	Alkylglycerone-phosphate synthase	62.1667	1.33333	6.33333	6.11333	4.44333	6.33333	10.3333	52.3333	11.3333	29.6667
EC:2.5.1.29	Geranylgeranyl diphosphate synthase	180.803	8	15.8867	21.0567	25.2167	45.1667	25	139.167	85.17	124.828
EC:2.5.1.3	Thiamine-phosphate diphosphorylase	284.39	15.3867	31.61	28.3	35.31	80.09	46.3667	149.567	110.493	188.223
EC:2.5.1.30	Heptaprenyl diphosphate synthase	71.3333	6	11.3333	15.8333	18.11	30.8333	1.66667	58.5	33.8333	86
EC:2.5.1.31	diphosphate specific)	238.723	12.86	28.3867	24.5667	31.6433	67.0333	41.6167	157.4	106.66	154.815
EC:2.5.1.32	15-cis-phytoene synthase	160.08	8.66667	18.11	12.6667	20.8867	34.2233	19.8333	108.667	52.28	98.4583
EC:2.5.1.39	4-hydroxybenzoate polyprenyltransferase	174.527	9.86	18.2733	12.0667	20.8633	44.8667	42.95	93.2333	75.66	97.0433
EC:2.5.1.41	Phosphoglycerol geranylgeranyltransferase	0	0	0	0	0	0	0	1	0	0.5
EC:2.5.1.42	Geranylgeranylglycerol-phosphate geranylgeranyltransferase	0	0	0	0	0.666667	0	0	1	0	0.5
EC:2.5.1.44	Homospermidine synthase	8.19333	2.66667	4.66667	1.66667	4.66667	2.66667	2.33333	0	0.556667	10.7917
EC:2.5.1.46	Deoxyhypusine synthase	49.0533	2.33333	6.22	1.78	7.33333	12.3333	5.83333	27.6667	21.1133	30.195
EC:2.5.1.47	Cysteine synthase	436.927	23.3867	59.22	46.3567	59.9267	118.433	88.9333	282.367	162.693	279.84
EC:2.5.1.48	Cystathionine gamma-synthase	106.893	9.52667	13.9433	12.79	25.31	41.2567	16.7833	62.7333	31.1567	92.4183
EC:2.5.1.49	O-acetylhomoserine aminocarboxypropyltransferase	185.553	17.5267	22.7767	24.6767	24.6667	59.7767	45.25	124.167	92.9467	139.215
EC:2.5.1.54	3-deoxy-7-phosphoheptulonate synthase	418.207	20.2467	37.22	34.92	37.3767	128.38	91.85	263.367	147.917	217.265
EC:2.5.1.55	3-deoxy-8-phosphooctulonate synthase	141.39	8.19333	16.3867	11.8433	15.5333	38.2	31.45	55.7333	74.8267	74.1483
EC:2.5.1.56	N-acetylneuraminate synthase	63.4433	1.66667	5.44333	6.66667	9.77667	7.11	5.66667	49	28.0567	32.2783
EC:2.5.1.57	N-acylneuraminate-9-phosphate synthase	4.66667	0	0	0	0	0	0	0	0	1.66667
EC:2.5.1.6	Methionine adenosyltransferase	237.223	12.86	28.3867	24.5667	32.6433	67.0333	41.6167	156.9	105.66	156.815
EC:2.5.1.60	Protein geranylgeranyltransferase type II	1.61	0.333333	0.776667	0	1	4.22333	1.66667	0	2.22333	1.97167
EC:2.5.1.61	Hydroxymethylbilane synthase	229.14	12.1933	25.72	21.2333	34.0867	66.5333	42.2833	137.233	86.3267	148.098
EC:2.5.1.62	Chlorophyll synthase	25.3333	1.66667	0	0	0	1	2.66667	25.3333	5.5	4.83333
EC:2.5.1.68	(2Z,6E)-farnesyl diphosphate synthase	15.1667	1.33333	1.66667	2.16667	6.11	5.33333	1.66667	19.6667	4.66667	20.5833
EC:2.5.1.7	UDP-N-acetylglucosamine 1-carboxyvinyltransferase	252.28	16.1933	27.61	30.5667	35.7533	72.81	41.95	163.733	111.437	184.732
EC:2.5.1.72	Quinolinate synthase	199.337	8.52667	24.7767	20.9	25.31	59.2567	36.2833	127.567	81.0467	133.953
EC:2.5.1.73	O-phospho-L-seryl-tRNA:Cys-tRNA synthase	0	0	0	0	0	0	0	0	0	0
EC:2.5.1.74	1,4-dihydroxy-2-naphthoate polyprenyltransferase	132.643	7.19333	13.4433	12.9	18.8667	36.31	7.11667	110.4	71.5467	78.0233
EC:2.5.1.75	tRNA dimethylallyltransferase	238.64	12.86	28.3867	24.5667	33.31	67.0333	41.6167	152.567	110.493	156.782
EC:2.5.1.76	Cysteate synthase	0	0	0	0	0	0	0	0	2.66667	0
EC:2.5.1.77	7,8-didemethyl-8-hydroxy-5-deazariboflavin synthase	42.6667	2	0	0	0	2	5.33333	39.3333	6	8.66667
EC:2.5.1.78	6,7-dimethyl-8-ribityllumazine synthase	241.083	12.86	29.72	24.5667	32.6433	70.7	50.2833	142.9	107.717	157.857
EC:2.5.1.84	All-trans-nonaprenyl-diphosphate synthase (geranyl-diphosphate specific)	21.3333	1	0	0	0	1	2.66667	19.6667	3	4.66667
EC:2.5.1.85	specific)	21.3333	1	0	0	0	1	2.66667	19.6667	3	4.66667
EC:2.5.1.86	Trans,polycis-decaprenyl diphosphate synthase	2.66667	0	0	0	1	0	0	0	0	0.5
EC:2.5.1.89	diphosphate specific)	0	0	0	0	0	0	0	1	0	0.5
EC:2.5.1.9	Riboflavin synthase	225.473	14.3867	27.72	25.0767	32.6433	77.0333	41.8667	130.233	95.16	146.193
EC:2.5.1.90	All-trans-octaprenyl-diphosphate synthase	169.723	8.19333	22.3867	16.4	18.2	42.7	32.6167	88.0667	84.1033	94.7317
EC:2.5.1.96	4,4'-diapophytoene synthase	1.33333	0	0	0	0	0	0	0	0	0
EC:2.5.1.97	Pseudaminic acid synthase	1.33333	0	0	0	0	0	0	0	0	0.333333
EC:2.6.1.1	Aspartate transaminase	189.33	13.1933	21.8833	17.7333	30.8667	61.7567	24.7833	52.2333	78.05	133.685
EC:2.6.1.102	GDP-perosamine synthase	22.4433	0	0.333333	2.66667	0.666667	3	3	17.6667	0.89	14.5
EC:2.6.1.103	(S)-3,5-dihydroxyphenylglycine transaminase	8	0	1.66667	0.666667	0	0.666667	4	11.6667	6	5
EC:2.6.1.105	Lysine--8-amino-7-oxononanoate transaminase	0	0	0	0	0	0	0	0	0	0
EC:2.6.1.106	dTDP-3-amino-3,4,6-trideoxy-alpha-D-glucose transaminase	0	0	0	0	0	0	0	0	0	0
EC:2.6.1.109	8-amino-3,8-dideoxy-alpha-D-manno-octulosonate transaminase	0	0	0.666667	0	0	0.666667	0	0	0	1.5
EC:2.6.1.11	Acetylornithine transaminase	249.473	12.86	28.72	24.5667	30.6433	64.0867	45.95	149.567	105.88	156.927
EC:2.6.1.13	Ornithine aminotransferase	39.3033	2.66667	7.11	7.66667	8.99667	11.4433	3	28	27.6133	41.6533
EC:2.6.1.16	Glutamine--fructose-6-phosphate transaminase (isomerizing)	324.61	16.1933	42.5533	33.5667	44.1967	77.7	59.7833	238.9	145.717	213.365
EC:2.6.1.17	Succinyldiaminopimelate transaminase	263.587	8.86	31.5	21.7333	25.31	57.2	60.95	155.233	83.99	133.987
EC:2.6.1.18	Beta-alanine--pyruvate transaminase	85.97	5.33333	11.8333	5.33333	6.33333	15.8333	25	42.6667	32.89	48.7083
EC:2.6.1.19	4-aminobutyrate--2-oxoglutarate transaminase	165.143	2.05333	12.11	8.8	16.0867	19.7567	27.2	127.4	54.1567	77.045
EC:2.6.1.2	Alanine transaminase	89.45	4.19333	10.1667	5.34333	9.75333	24.3667	27.1167	56.7333	33.6	42.2783
EC:2.6.1.21	D-amino-acid transaminase	43.4433	5.66667	6.33333	7	10.3333	15.8333	4.83333	1	21.3367	42.2783
EC:2.6.1.22	(S)-3-amino-2-methylpropionate transaminase	62.4167	1.52667	3.66667	3.4	9.77667	9.5	6.75	30	11.5	32.2667
EC:2.6.1.36	L-lysine 6-transaminase	12.1667	0.666667	0	0	3	0	0	0	0	4.25
EC:2.6.1.37	2-aminoethylphosphonate--pyruvate transaminase	17.2833	1.52667	0.666667	1.4	0.2	13.8667	5.45	6.73333	11.4333	9.61167
EC:2.6.1.42	Branched-chain-amino-acid transaminase	327.36	18.1933	45.94	32.1233	52.7533	98.8667	52.2833	220.9	153.773	232.552
EC:2.6.1.44	Alanine--glyoxylate transaminase	24.1933	4.52667	2.11	2.84333	5	19.0567	4.25	4.66667	5.55667	16.8783
EC:2.6.1.45	Serine--glyoxylate transaminase	24.1933	4.52667	2.11	2.84333	5	19.0567	4.25	4.66667	5.55667	16.8783
EC:2.6.1.48	5-aminovalerate transaminase	22.6667	0	2	0.666667	0	2.33333	9.66667	12.6667	8	5.5
EC:2.6.1.51	Serine--pyruvate transaminase	24.1933	4.52667	2.11	2.84333	5	19.0567	4.25	4.66667	5.55667	16.8783
EC:2.6.1.52	Phosphoserine transaminase	167.613	11.5267	21.61	17.2333	24.9767	45.6433	39.45	95.4	75.9933	118.065
EC:2.6.1.55	Taurine--2-oxoglutarate transaminase	11.6667	1.33333	2.33333	0.89	5.77667	3	1.66667	22.3333	5	19
EC:2.6.1.57	Aromatic-amino-acid transaminase	103.45	5.52667	13.1667	7.4	7.86667	27.3667	36.1167	60.0667	51.8233	48.0283
EC:2.6.1.59	dTDP-4-amino-4,6-dideoxygalactose transaminase	22.2	1	0.666667	0	0.2	1.36667	2.53333	6.06667	3.49	5.4
EC:2.6.1.62	Adenosylmethionine--8-amino-7-oxononanoate transaminase	138.64	4.86	14.0533	10.5667	8.97667	33.5333	32.2833	80.0667	62.8267	68.1267
EC:2.6.1.64	Glutamine--phenylpyruvate transaminase	0	0	0	0	0	0	0	0	0	2.16667
EC:2.6.1.66	Valine--pyruvate transaminase	133.4	6.72	10.1667	6.52	10.9533	36.0667	32.5667	81.1333	38.8667	48.0567
EC:2.6.1.7	Kynurenine--oxoglutarate transaminase	0	0	0	0	0	0	0	0	0	2.16667
EC:2.6.1.76	Diaminobutyrate--2-oxoglutarate transaminase	73.0333	5.05333	3.66667	4.68667	1.42	34.2	20.7	35.7333	19.9333	21.6567
EC:2.6.1.77	Taurine--pyruvate aminotransferase	2.33333	0	0	0	0	0	1	0	1.33333	0
EC:2.6.1.78	Aspartate--prephenate aminotransferase	0	0	0	0	0	0	0	0	0	1.83333
EC:2.6.1.79	Glutamate--prephenate aminotransferase	0	0	0	0	0	0	0	0	0	1.83333
EC:2.6.1.81	Succinylornithine transaminase	12.2	1.33333	4.66667	3	0.2	4.03333	11.8667	28.7333	10.9333	12.0667
EC:2.6.1.82	Putrescine aminotransferase	4.27667	0	0	0	1.77667	0.166667	1.66667	6.5	1.55667	2.33333
EC:2.6.1.83	LL-diaminopimelate aminotransferase	67.9433	1.33333	7.44333	6.66667	7	18.2233	11.6667	87.3333	32.28	39.2167
EC:2.6.1.84	Arginine--pyruvate transaminase	20.3333	0	2.33333	0.666667	0	4	9	13.6667	8	9.5
EC:2.6.1.85	Aminodeoxychorismate synthase	222.23	20.0533	28.8867	29.7433	43.0633	84.9	42.0667	142.3	99.37	179.372
EC:2.6.1.86	2-amino-4-deoxychorismate synthase	9.66667	0	1.66667	1.66667	5.11	2.66667	0.666667	5.33333	0	11.3333
EC:2.6.1.87	UDP-4-amino-4-deoxy-L-arabinose aminotransferase	0.866667	0	0	0	0.2	0.366667	2.53333	4.73333	2.26667	1.4
EC:2.6.1.9	Histidinol-phosphate transaminase	375.637	18.1933	45.5533	36.0667	42.9733	91.5333	84.6167	255.233	166.107	231.065
EC:2.6.1.92	UDP-4-amino-4,6-dideoxy-N-acetyl-beta-L-altrosamine transaminase	0.666667	0	0	0	0	0	0	0	0	0
EC:2.6.1.96	4-aminobutyrate--pyruvate transaminase	15.36	0	0	0	2.33333	2.16667	3.83333	0	1.55667	9.04167
EC:2.6.1.97	Archaeosine synthase	0	0	0	0	0	0	0	1	0	0
EC:2.6.1.98	UDP-2-acetamido-2-deoxy-ribo-hexuluronate aminotransferase	0	0	0	0	0	0	0	0	1.33333	0
EC:2.6.99.2	Pyridoxine 5'-phosphate synthase	174.807	10.5267	21.72	15.0667	17.8667	43.8667	49.2833	99.4	82.9367	93.1817
EC:2.7.1.1	Hexokinase	0.5	0	0	0	0	0	0	0	0	0.666667
EC:2.7.1.100	S-methyl-5-thioribose kinase	5.31	0.666667	2	3.66667	0.2	3.2	3.86667	4.73333	6.93333	13.0667
EC:2.7.1.107	Diacylglycerol kinase (ATP)	158.28	10.3867	15.72	13.3533	16.31	42.2	41.7	113.9	75.77	94.865
EC:2.7.1.11	6-phosphofructokinase	237.64	13.5267	29.6067	25.9	36.1967	71.7	37.1167	200.733	121.717	174.358
EC:2.7.1.113	Deoxyguanosine kinase	4.33333	2.33333	2	4.66667	2.33333	7	0	0	2.33333	14.5
EC:2.7.1.119	Hygromycin-B 7''-O-kinase	0	0	0	0	0	0	0	0	0	0
[truncated: 1,159 more rows]
